# Supplementary material for: The pregnant myometrium is epigenetically activated at contractility-driving gene loci prior to the onset of labor in mice
Source: PLOS journal article supplement (doi:10.1371/journal.pbio.3000710), 2020-07-15
Supplement: S1 (10.1371/journal.pbio.3000710.s001) [file journal.pbio.3000710.s001]

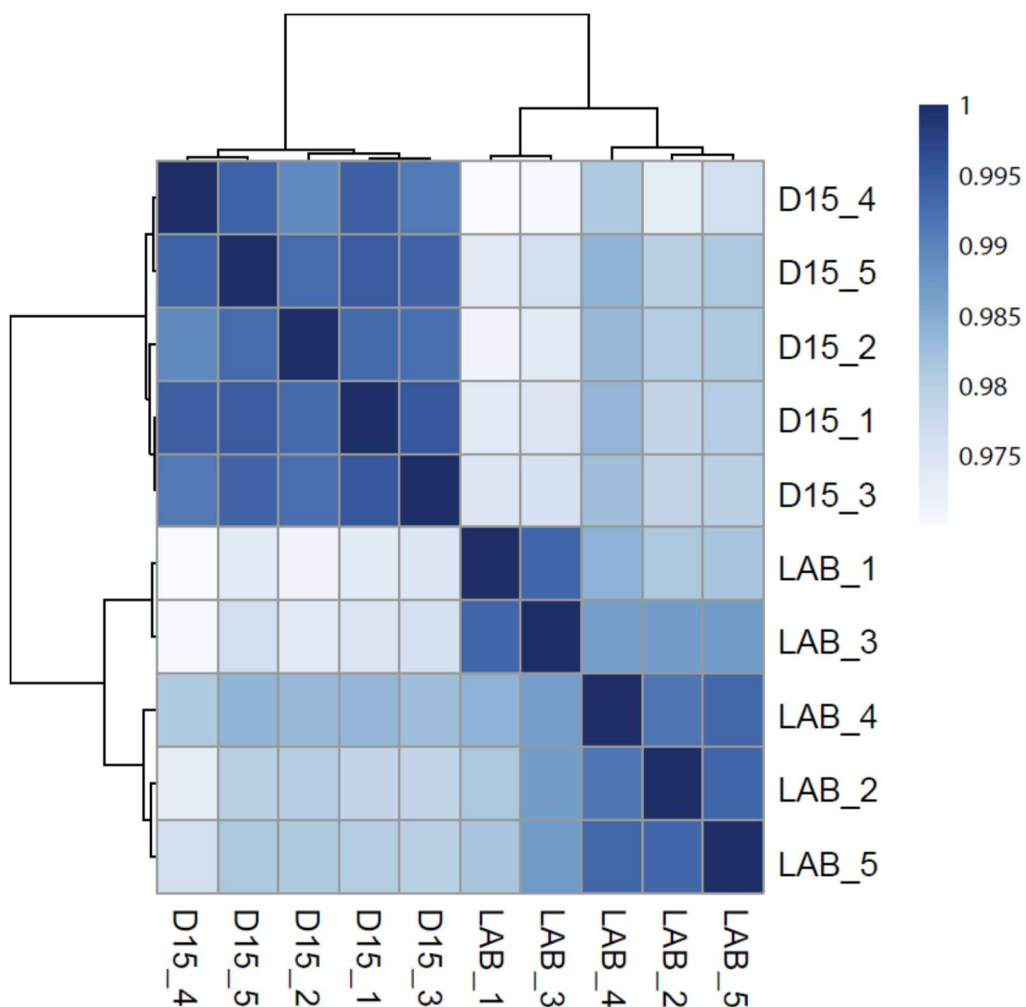

**S1 Fig. Gestational timepoint specific RNA-seq samples cluster based on gestational timepoint of sample collection.** Hierarchical clustering of RNA-seq samples from d15 and d19 when in active labour. Darker colour indicates increased correlation. Data associated with this figure can be found in S1 DATA.
