# Supplementary material for: The pregnant myometrium is epigenetically activated at contractility-driving gene loci prior to the onset of labor in mice
Source: PLoS Biol. 2020 Jul 15;18(7):e3000710. doi: 10.1371/journal.pbio.3000710 (PMC7384763; doi:10.1371/journal.pbio.3000710)
Supplement: S1 Table — d, day. (XLSX) [file pbio.3000710.s019.xlsx]

## Sheet: All genes LAB vs D15
DESeq2 mm10 exon count Labour vs. D15 RNA-seq (n=5)
Highlighted significance: -2 => log2FC >= 2, padj < 0.01
geneid	gene_name	baseMean	log2FoldChange	lfcSE	stat	pvalue	padj
ENSMUSG00000030093	Wnt7a	104.555	9.04171	0.957887	9.43923	3.75528e-21	3.64168e-19
ENSMUSG00000035186	Ubd	216.709	8.99767	2.35086	3.82739	0.00012951	0.00105641
ENSMUSG00000045027	Prss22	64.5492	8.92742	0.967722	9.22519	2.83062e-20	2.51022e-18
ENSMUSG00000048992	Prss32	37.5216	8.72355	1.07526	8.113	4.93835e-16	2.71147e-14
ENSMUSG00000061144	Spink12	29.7268	8.38378	1.02107	8.21082	2.19679e-16	1.25739e-14
ENSMUSG00000050635	Sprr2f	1631.38	8.15757	0.577589	14.1235	2.72223e-45	1.70671e-42
ENSMUSG00000026220	Slc16a14	530.197	7.96837	0.511864	15.5674	1.21305e-54	1.16795e-51
ENSMUSG00000073399	Trim40	16.6261	7.55011	1.13752	6.63734	3.19394e-11	9.65307e-10
ENSMUSG00000031364	Grpr	30.6543	7.26586	1.02926	7.05933	1.67301e-12	6.05406e-11
ENSMUSG00000044165	Bcl2l15	71.181	7.20162	0.815229	8.83386	1.01121e-18	7.61489e-17
ENSMUSG00000035429	Ptprh	28.8203	7.17952	1.02002	7.03858	1.94212e-12	6.96245e-11
ENSMUSG00000079620	Muc4	3126.68	7.1525	0.542304	13.1891	1.01388e-39	4.48086e-37
ENSMUSG00000092909	Gm25732	12.3415	7.11744	3.02905	2.34973	0.0187871	0.0703155
ENSMUSG00000032758	Kap	10642.9	7.04958	0.65772	10.7182	8.36057e-27	1.34162e-24
ENSMUSG00000018907	Alox12e	207.545	6.98899	0.563984	12.3922	2.88128e-35	9.70956e-33
ENSMUSG00000042845	Wfdc12	11.2635	6.97837	0.965307	7.22917	4.85969e-13	1.88236e-11
ENSMUSG00000103385	Gm37752	10.7154	6.9188	1.10792	6.24483	4.24267e-10	1.07397e-08
ENSMUSG00000035775	Krt20	155.918	6.89634	0.731784	9.42402	4.34154e-21	4.18013e-19
ENSMUSG00000114404	Gm40915	20.4511	6.67806	0.998765	6.68632	2.28857e-11	7.04309e-10
ENSMUSG00000030155	Clec2e	79.0995	6.66904	0.554619	12.0245	2.6406e-33	7.65461e-31
ENSMUSG00000022126	Acod1	349.581	6.59019	1.4501	4.54463	5.5032e-06	6.35923e-05
ENSMUSG00000106609	Gm43181	18.9789	6.57036	1.97636	3.32447	0.000885859	0.0055851
ENSMUSG00000068536	Doxl2	12.0176	6.49231	1.14805	5.65506	1.55795e-08	3.09511e-07
ENSMUSG00000109446	Gm9195	11.9304	6.47971	0.960284	6.74771	1.50201e-11	4.70846e-10
ENSMUSG00000074445	Sprr2a3	11.7955	6.46775	1.06783	6.05693	1.38742e-09	3.25814e-08
ENSMUSG00000032226	Gcnt3	42.4813	6.45632	0.701246	9.20692	3.35622e-20	2.93767e-18
ENSMUSG00000114355	Gm40916	10.5443	6.29865	1.03202	6.10323	1.03946e-09	2.48429e-08
ENSMUSG00000042212	Sprr2d	6.49151	6.19583	1.32297	4.68328	2.82323e-06	3.51392e-05
ENSMUSG00000050092	Sprr2b	6.3972	6.17854	1.08865	5.67542	1.38347e-08	2.78128e-07
ENSMUSG00000058260	Serpina9	34.2981	6.14932	0.829792	7.41067	1.25662e-13	5.19589e-12
ENSMUSG00000056632	Dsg3	31.2369	6.00369	0.737063	8.14543	3.77926e-16	2.12704e-14
ENSMUSG00000031551	Ido1	115.861	5.98853	1.80356	3.3204	0.000898876	0.00565057
ENSMUSG00000021347	Prl7b1	30.4314	5.9418	0.863991	6.87715	6.10599e-12	2.0173e-10
ENSMUSG00000102488	Gm37920	5.49884	5.93773	1.06394	5.58087	2.39324e-08	4.58559e-07
ENSMUSG00000040264	Gbp2b	282.717	5.91277	1.53625	3.84882	0.000118686	0.000981894
ENSMUSG00000029272	Sult1e1	7.83207	5.86182	1.00919	5.80842	6.30643e-09	1.33936e-07
ENSMUSG00000022886	Prl2a1	66.2548	5.83459	0.651003	8.96246	3.17527e-19	2.56931e-17
ENSMUSG00000061259	Tmprss11d	33.3269	5.82948	0.676644	8.61527	6.97752e-18	4.75018e-16
ENSMUSG00000086324	Gm15564	686.048	5.81558	1.31282	4.42982	9.43104e-06	0.000103565
ENSMUSG00000111002	Gm47674	4.9105	5.78569	1.02792	5.62855	1.81734e-08	3.55284e-07
ENSMUSG00000059657	Stfa2l1	4.88232	5.78028	3.03341	1.90554	0.0567103	0.164587
ENSMUSG00000064246	Chil1	252.092	5.75724	1.28086	4.49482	6.96302e-06	7.8674e-05
ENSMUSG00000060188	Cxcl17	797.452	5.7127	0.261721	21.8274	1.27332e-105	1.14424e-101
ENSMUSG00000054976	Nyap2	15.4917	5.71041	0.870096	6.56296	5.27492e-11	1.54741e-09
ENSMUSG00000042064	Myo3b	123.188	5.70629	0.357471	15.9629	2.31575e-57	2.67437e-54
ENSMUSG00000113211	4921525O09Rik	4.55202	5.67227	1.06275	5.33737	9.43028e-08	1.59894e-06
ENSMUSG00000024245	Tmem178	34.318	5.64796	0.661963	8.53214	1.43661e-17	9.42324e-16
ENSMUSG00000107623	Gm10415	6.38472	5.55882	1.14518	4.85412	1.20924e-06	1.64479e-05
ENSMUSG00000115326	Gm35019	62.6838	5.51303	0.437939	12.5886	2.44047e-36	9.01269e-34
ENSMUSG00000035861	Tmprss11b	22.3082	5.50745	0.735338	7.48969	6.90387e-14	2.95901e-12
ENSMUSG00000087461	C230014O12Rik	4.00975	5.49122	1.0669	5.14687	2.6487e-07	4.12515e-06
ENSMUSG00000087677	Gm15226	13.3488	5.487	0.88039	6.23246	4.59155e-10	1.15255e-08
ENSMUSG00000021961	4930578I06Rik	3.94866	5.45596	1.10962	4.91695	8.79039e-07	1.22534e-05
ENSMUSG00000105239	Gm43091	5.53561	5.34141	1.06634	5.0091	5.46865e-07	7.92967e-06
ENSMUSG00000024365	Cyp21a1	35.9047	5.33616	0.549975	9.70256	2.94026e-22	3.13306e-20
ENSMUSG00000076846	Trav13-2	3.56172	5.32555	1.06165	5.01629	5.26785e-07	7.6807e-06
ENSMUSG00000049719	Prss46	5.30575	5.30299	1.03694	5.11406	3.15313e-07	4.82984e-06
ENSMUSG00000075316	Scn9a	3.41246	5.24729	1.1683	4.49138	7.07628e-06	7.97865e-05
ENSMUSG00000019987	Arg1	336.986	5.1555	0.621266	8.29837	1.0555e-16	6.24021e-15
ENSMUSG00000082976	Gm15056	3.14168	5.14493	3.0374	1.69386	0.0902918	0.232513
ENSMUSG00000032496	Ltf	17652	5.13909	0.359115	14.3104	1.88348e-46	1.20897e-43
ENSMUSG00000027871	Hsd3b1	10.5528	5.13113	1.31425	3.90422	9.45286e-05	0.000807221
ENSMUSG00000110887	Cbx3-ps8	43.457	5.12973	1.41369	3.62862	0.000284943	0.00208234
ENSMUSG00000026390	Marco	17.0282	5.12753	1.97971	2.59004	0.00959661	0.0412824
ENSMUSG00000058427	Cxcl2	33.7853	5.11448	1.09486	4.67136	2.99216e-06	3.69687e-05
ENSMUSG00000062310	Glrp1	6.99328	5.10929	1.05497	4.84308	1.2784e-06	1.72754e-05
ENSMUSG00000029867	Llcfc1	4.65827	5.09918	1.08392	4.70437	2.54646e-06	3.21095e-05
ENSMUSG00000039196	Orm1	37.0126	5.09891	1.92579	2.6477	0.00810419	0.0358316
ENSMUSG00000018623	Mmp7	1322.48	5.08321	0.84061	6.04704	1.47528e-09	3.44945e-08
ENSMUSG00000046203	Sprr2g	13.2537	5.06691	0.815939	6.20991	5.30147e-10	1.32213e-08
ENSMUSG00000044912	Syt16	46.7586	5.05509	0.488456	10.3491	4.22329e-25	5.86885e-23
ENSMUSG00000102029	Gm29530	2.92062	5.0262	1.09379	4.59521	4.32303e-06	5.12059e-05
ENSMUSG00000033187	BC016579	12.7423	5.00193	0.780758	6.4065	1.48897e-10	4.05877e-09
ENSMUSG00000096576	Oog1	2.7671	4.97189	1.1739	4.23536	2.28188e-05	0.000228434
ENSMUSG00000074892	B3galt5	30.984	4.96829	0.500987	9.91701	3.51119e-23	4.06259e-21
ENSMUSG00000022755	Adgrg7	49.7807	4.96174	0.580481	8.54764	1.25629e-17	8.32144e-16
ENSMUSG00000036813	Entpd8	9.21216	4.95624	0.926548	5.34915	8.8369e-08	1.50972e-06
ENSMUSG00000113593	Zp4-ps	2.79607	4.95455	1.17382	4.22088	2.43349e-05	0.00024137
ENSMUSG00000034159	2310007B03Rik	30.5045	4.95169	0.552684	8.95936	3.26577e-19	2.6203e-17
ENSMUSG00000113940	Gm40477	2.7206	4.94289	1.07494	4.59828	4.25997e-06	5.057e-05
ENSMUSG00000016349	Eef1a2	15.222	4.93055	0.692662	7.11826	1.09297e-12	4.03084e-11
ENSMUSG00000079029	Gm5662	2.65923	4.91506	1.20982	4.06265	4.85189e-05	0.000449029
ENSMUSG00000045731	Pnoc	43.8415	4.90177	0.641824	7.63725	2.21917e-14	1.00718e-12
ENSMUSG00000105806	Gm43345	2.59628	4.85721	1.08699	4.46848	7.87772e-06	8.7831e-05
ENSMUSG00000026984	Il1f6	37.2458	4.84148	0.699634	6.92002	4.51565e-12	1.52362e-10
ENSMUSG00000103187	Gm37087	3.86393	4.83498	1.10112	4.39098	1.12843e-05	0.000120816
ENSMUSG00000079597	Gm5483	2.50236	4.81681	3.04026	1.58434	0.113115	0.273422
ENSMUSG00000029417	Cxcl9	733.123	4.81258	1.3258	3.62994	0.000283491	0.00207438
ENSMUSG00000115093	Gm8047	5.76822	4.81129	1.0143	4.74345	2.10106e-06	2.7024e-05
ENSMUSG00000043592	Unc5cl	248.793	4.80678	0.33119	14.5137	9.92681e-48	6.69042e-45
ENSMUSG00000062551	Prl2c1	3.83535	4.80305	1.18381	4.05728	4.9648e-05	0.000458534
ENSMUSG00000085533	Gm12146	5.72026	4.79061	1.01302	4.72903	2.25595e-06	2.87828e-05
ENSMUSG00000110520	Gm45776	10.8861	4.76889	0.792244	6.01947	1.74988e-09	4.0286e-08
ENSMUSG00000025329	Padi1	2326.53	4.72908	0.367919	12.8536	8.21205e-38	3.25572e-35
ENSMUSG00000000983	Wfdc18	70.136	4.7181	0.553842	8.51885	1.61145e-17	1.03931e-15
ENSMUSG00000056071	S100a9	93.2497	4.71114	1.38774	3.39482	0.000686739	0.00447085
ENSMUSG00000090588	Gm9573	3.47229	4.67057	1.12951	4.13505	3.54873e-05	0.000338549
ENSMUSG00000109366	Gm44698	3.46364	4.66713	1.07074	4.3588	1.30776e-05	0.000138096
ENSMUSG00000105096	Gbp10	77.2118	4.66528	1.53291	3.04342	0.00233908	0.0127767
ENSMUSG00000028699	Tspan1	410.969	4.66243	0.179544	25.9682	1.13162e-148	3.05073e-144
ENSMUSG00000098370	Gm19541	5.21571	4.64908	1.0075	4.61446	3.94109e-06	4.72844e-05
ENSMUSG00000073821	8030451A03Rik	101.56	4.60564	0.3092	14.8953	3.53463e-50	2.80265e-47
ENSMUSG00000087470	A630031M04Rik	3.28759	4.57946	1.09896	4.16709	3.08512e-05	0.000299287
ENSMUSG00000034117	Ptgdr2	78.9509	4.57812	0.380625	12.0279	2.53481e-33	7.42783e-31
ENSMUSG00000051723	Rpl31-ps13	4.92158	4.56401	1.06338	4.292	1.77071e-05	0.000181438
ENSMUSG00000048031	Fcrl5	3.203	4.55972	1.08415	4.20581	2.60153e-05	0.000256198
ENSMUSG00000094559	Cyp2d34	2.11624	4.55625	1.20345	3.786	0.00015309	0.00122215
ENSMUSG00000026420	Il24	101.162	4.55341	0.528144	8.62153	6.60638e-18	4.52034e-16
ENSMUSG00000037578	Pkd2l1	2.09119	4.54421	1.20302	3.77733	0.000158516	0.00125875
ENSMUSG00000056054	S100a8	61.4481	4.54309	1.3813	3.28898	0.0010055	0.00621157
ENSMUSG00000022382	Wnt7b	121.625	4.53779	0.274141	16.5527	1.52989e-61	2.42614e-58
ENSMUSG00000042367	Gjb3	13.844	4.52263	0.719983	6.28158	3.35154e-10	8.62983e-09
ENSMUSG00000113909	Gm36377	18.461	4.51721	0.663588	6.80725	9.94821e-12	3.1852e-10
ENSMUSG00000040152	Thbs1	34514.1	4.51287	0.23997	18.8059	6.75038e-79	1.81983e-75
ENSMUSG00000027403	Tgm6	3.14732	4.50666	1.16166	3.87949	0.000104677	0.000880496
ENSMUSG00000083819	Gm11977	1.98277	4.49364	1.17618	3.82053	0.000133164	0.00108164
ENSMUSG00000101859	Gm29233	3.05951	4.48137	1.04978	4.26887	1.96467e-05	0.00019882
ENSMUSG00000114718	Gm47753	33.8273	4.47841	0.538586	8.31514	9.16468e-17	5.4541e-15
ENSMUSG00000097373	Gm26877	46.1489	4.4529	0.374328	11.8957	1.24565e-32	3.42669e-30
ENSMUSG00000035451	Foxa1	1.93643	4.44468	1.44938	3.06661	0.00216498	0.01197
ENSMUSG00000042250	Pglyrp4	1.92385	4.44345	1.82486	2.43495	0.0148937	0.0585563
ENSMUSG00000046049	Rp1l1	1.9536	4.43401	1.27821	3.46893	0.000522537	0.00352618
ENSMUSG00000111207	Gm8125	1.90078	4.42912	1.14617	3.86429	0.000111412	0.000929027
ENSMUSG00000049112	Oxtr	3187.89	4.41647	0.201086	21.9631	6.49552e-107	8.75564e-103
ENSMUSG00000047104	Pbp2	19.5713	4.40848	0.637137	6.9192	4.54193e-12	1.52866e-10
ENSMUSG00000053675	Tgm5	6.4262	4.40398	0.939134	4.68941	2.73994e-06	3.42766e-05
ENSMUSG00000116542	Gm17783	1.89661	4.40109	1.23622	3.56012	0.000370682	0.0026174
ENSMUSG00000032487	Ptgs2	461.574	4.39645	0.262529	16.7466	5.99988e-63	1.01094e-59
ENSMUSG00000030142	Clec4e	94.6646	4.38337	1.16297	3.76912	0.000163824	0.00129214
ENSMUSG00000100596	Gm29502	1.86436	4.38277	1.20304	3.64306	0.000269412	0.00198391
ENSMUSG00000026971	Itgb6	332.574	4.38209	0.354824	12.35	4.86928e-35	1.62063e-32
ENSMUSG00000022586	Ly6i	59.3528	4.3785	1.54126	2.84087	0.00449913	0.0220371
ENSMUSG00000029371	Cxcl5	89.3337	4.3521	1.04582	4.16143	3.16265e-05	0.000305927
ENSMUSG00000066027	Gm10436	1.80222	4.34949	1.23654	3.51747	0.000435676	0.00300855
ENSMUSG00000114697	Gm30806	2.78585	4.34694	1.12539	3.8626	0.000112188	0.000934919
ENSMUSG00000058354	Krt6a	4.20308	4.33641	1.02725	4.22137	2.42822e-05	0.000241025
ENSMUSG00000089708	5330439A09Rik	2.73344	4.31611	1.06487	4.05319	5.05236e-05	0.000465505
ENSMUSG00000095799	Gm8332	1.75241	4.31606	1.37682	3.1348	0.00171974	0.00983504
ENSMUSG00000013653	1810065E05Rik	4.13888	4.31552	1.1598	3.7209	0.000198514	0.00152864
ENSMUSG00000039269	2300002M23Rik	2.69253	4.30509	1.41141	3.05022	0.00228675	0.0125353
ENSMUSG00000098333	Gm27158	1.74556	4.29222	1.2186	3.52225	0.000427904	0.00296095
ENSMUSG00000048764	Tmprss11f	1.74	4.28908	1.25058	3.42967	0.000604307	0.00400086
ENSMUSG00000046133	C130073F10Rik	2.69673	4.27995	1.32926	3.21981	0.00128275	0.00768653
ENSMUSG00000088104	Gm22380	5.87421	4.27199	0.937112	4.55868	5.14768e-06	5.98948e-05
ENSMUSG00000044103	Il1f9	62.7394	4.26403	0.779004	5.47369	4.40767e-08	8.02881e-07
ENSMUSG00000068893	Sprr2a2	1.68135	4.25039	1.4295	2.97334	0.00294576	0.0155471
ENSMUSG00000112290	Gm33782	2.60197	4.24957	1.12537	3.77615	0.000159272	0.00126363
ENSMUSG00000050747	Trim15	194.228	4.23069	0.476885	8.87152	7.21542e-19	5.47945e-17
ENSMUSG00000094787	Ighv1-54	1.65021	4.22909	1.43468	2.94775	0.00320096	0.016685
ENSMUSG00000043164	Tmem212	7.81939	4.22261	0.900982	4.68667	2.77681e-06	3.46414e-05
ENSMUSG00000020826	Nos2	124.313	4.219	1.26324	3.33983	0.000838283	0.00531373
ENSMUSG00000104937	Gm43057	16.7669	4.20373	0.545172	7.71083	1.24998e-14	5.9016e-13
ENSMUSG00000020912	Krt12	1.63909	4.20181	1.19268	3.523	0.000426695	0.0029541
ENSMUSG00000021509	Slc25a48	96.4233	4.192	0.454399	9.22539	2.82532e-20	2.51022e-18
ENSMUSG00000105941	Gm42809	1.60846	4.18475	1.20836	3.46317	0.000533854	0.00359265
ENSMUSG00000074001	Klhl40	5.52824	4.18187	0.971141	4.30614	1.66128e-05	0.000171678
ENSMUSG00000020651	Slc26a4	842.011	4.1742	0.40941	10.1956	2.07359e-24	2.72692e-22
ENSMUSG00000094732	1500015L24Rik	2.46949	4.15845	1.19663	3.47512	0.000510621	0.00345441
ENSMUSG00000054618	Gm9951	5.38792	4.14218	1.01026	4.10012	4.12937e-05	0.000389243
ENSMUSG00000104301	Wdr49	1.53547	4.10799	1.24273	3.30562	0.000947676	0.00590168
ENSMUSG00000112837	Gm48053	2.42146	4.10521	1.11408	3.68484	0.000228847	0.00172875
ENSMUSG00000117110	AC105304.1	1.52699	4.10235	1.39975	2.93076	0.00338133	0.0174397
ENSMUSG00000021194	Chga	5.12242	4.08237	1.30964	3.11718	0.00182591	0.0103609
ENSMUSG00000053797	Krt16	1.5008	4.08064	1.76835	2.3076	0.0210215	0.0766871
ENSMUSG00000082485	Gm15693	1.49551	4.07805	1.51181	2.69746	0.00698697	0.0317214
ENSMUSG00000050108	Bpifc	56.828	4.06619	0.499722	8.13691	4.05479e-16	2.27262e-14
ENSMUSG00000111376	Gm47099	3.54191	4.05751	1.11505	3.63886	0.000273853	0.00201221
ENSMUSG00000081778	Gm6325	27.3866	4.05491	0.590605	6.8657	6.61657e-12	2.18064e-10
ENSMUSG00000007682	Dio2	7593.27	4.05431	0.261549	15.5012	3.40737e-54	3.16756e-51
ENSMUSG00000075520	Malrd1	254.499	4.05176	0.419202	9.66541	4.22936e-22	4.43655e-20
ENSMUSG00000085969	Gm15600	4.96495	4.02754	0.938117	4.29322	1.76101e-05	0.000180583
ENSMUSG00000091618	H60c	122.421	4.02331	0.392423	10.2525	1.15341e-24	1.54701e-22
ENSMUSG00000085918	Gm13032	31.3064	4.01712	0.489948	8.19907	2.42254e-16	1.38367e-14
ENSMUSG00000101581	C430002N11Rik	62.8287	4.01643	0.341313	11.7676	5.73545e-32	1.48675e-29
ENSMUSG00000056078	Lipm	6.65145	4.01609	0.812083	4.94542	7.5979e-07	1.06794e-05
ENSMUSG00000050069	Grem2	118.996	4.01304	0.342123	11.7298	8.96562e-32	2.238e-29
ENSMUSG00000026413	Pkp1	5.04489	4.00404	0.95585	4.18898	2.80206e-05	0.000273699
ENSMUSG00000103356	Gm37595	2.2526	4.00233	1.47601	2.71159	0.00669611	0.0306434
ENSMUSG00000068740	Celsr2	430.684	3.98805	0.356808	11.177	5.28492e-29	1.01047e-26
ENSMUSG00000089697	Gm15947	1.41408	3.97924	1.79483	2.21706	0.0266192	0.0918739
ENSMUSG00000105359	Rpl21-ps10	1.38713	3.97312	1.46649	2.70927	0.00674309	0.0308166
ENSMUSG00000099205	Gm27944	2.17972	3.95499	1.149	3.44211	0.000577197	0.00384594
ENSMUSG00000099364	5730419F03Rik	11.2017	3.95474	0.612187	6.46001	1.04694e-10	2.90374e-09
ENSMUSG00000037973	Itprid1	1.38273	3.94617	1.48634	2.65497	0.00793164	0.0351924
ENSMUSG00000056699	Gm5533	1.37793	3.94277	1.51886	2.59588	0.00943494	0.0406971
ENSMUSG00000106361	Gm35066	2.12097	3.93828	1.12263	3.50808	0.000451351	0.00310722
ENSMUSG00000117318	AC241601.2	1.3493	3.93405	1.8503	2.12616	0.0334896	0.109473
ENSMUSG00000056328	Myh1	2.096	3.92255	1.22226	3.20925	0.00133082	0.00792645
ENSMUSG00000109846	Gm45627	4.71069	3.91804	0.987419	3.96796	7.24913e-05	0.000639285
ENSMUSG00000104841	Gm17743	1.34484	3.91162	1.28357	3.04746	0.00230786	0.0126304
ENSMUSG00000061809	Tbpl2	1.31501	3.89065	1.26795	3.06845	0.0021517	0.0119112
ENSMUSG00000026822	Lcn2	15067.4	3.88572	0.433801	8.95739	3.32445e-19	2.65946e-17
ENSMUSG00000117019	AC165291.1	3.15253	3.87998	1.08921	3.56219	0.000367777	0.00259892
ENSMUSG00000021219	Rgs6	6.08071	3.87733	1.00192	3.86992	0.000108871	0.000908405
ENSMUSG00000098987	Gm8982	1.28702	3.86528	1.49483	2.58577	0.00971617	0.0417248
ENSMUSG00000074272	Ceacam1	2002.12	3.85933	0.221843	17.3967	8.73598e-68	1.81164e-64
ENSMUSG00000113303	4930423D22Rik	3.09426	3.8559	1.14986	3.35335	0.000798383	0.00509555
ENSMUSG00000022875	Kng1	154.317	3.84517	0.275477	13.9582	2.80438e-44	1.64355e-41
ENSMUSG00000022026	Olfm4	26.6548	3.83775	0.70642	5.43267	5.55166e-08	9.89207e-07
ENSMUSG00000021640	Naip1	1300.75	3.83613	0.634613	6.04483	1.49564e-09	3.47894e-08
ENSMUSG00000103421	Golt1a	3.04748	3.82628	1.07975	3.54366	0.000394609	0.0027596
ENSMUSG00000092284	Gm8801	1.25291	3.82372	2.26854	1.68554	0.0918835	0.235326
ENSMUSG00000098162	Gm26976	1.27381	3.8197	1.29075	2.95929	0.0030835	0.0161885
ENSMUSG00000103286	Gm5850	1.26258	3.81668	1.48722	2.56632	0.0102784	0.043637
ENSMUSG00000044938	Klhl31	7.153	3.8101	0.817111	4.6629	3.1179e-06	3.8294e-05
ENSMUSG00000044678	Ly6k	1.93555	3.80734	1.52055	2.50393	0.0122823	0.0502378
ENSMUSG00000003051	Elf3	1017.9	3.80588	0.360138	10.5678	4.20087e-26	6.39837e-24
ENSMUSG00000038651	Sycp2l	1.2517	3.805	1.34046	2.83858	0.00453154	0.0221757
ENSMUSG00000051758	4930544M13Rik	1.95392	3.80484	1.25246	3.0379	0.00238236	0.0129776
ENSMUSG00000035818	Plekhs1	309.497	3.80278	0.292086	13.0194	9.49382e-39	3.99912e-36
ENSMUSG00000029868	Trpv6	912.916	3.80269	0.286204	13.2866	2.76715e-40	1.33214e-37
ENSMUSG00000035202	Lars2	24688.7	3.79646	1.02392	3.70777	0.000209096	0.00160006
ENSMUSG00000053783	1700016K19Rik	1.92387	3.79046	1.18571	3.19678	0.00138972	0.00820892
ENSMUSG00000107768	Gm44275	31.4189	3.78644	0.506486	7.47589	7.66839e-14	3.2505e-12
ENSMUSG00000086203	Gm13985	1.2221	3.78145	1.43733	2.63088	0.00851638	0.0373504
ENSMUSG00000031131	Vgll1	1.21469	3.77519	1.57897	2.39092	0.0168061	0.0645867
ENSMUSG00000114784	Gm47754	53.386	3.77381	0.50094	7.53345	4.94152e-14	2.15564e-12
ENSMUSG00000111198	Gm34263	1.20695	3.77032	1.33168	2.83125	0.00463661	0.0225955
ENSMUSG00000078817	Nlrp12	2.86409	3.77021	1.58433	2.3797	0.0173269	0.0659861
ENSMUSG00000051397	Tacstd2	315.028	3.76366	0.421257	8.93434	4.09621e-19	3.21952e-17
ENSMUSG00000024771	Lipk	20.668	3.75743	0.550499	6.8255	8.76208e-12	2.82556e-10
ENSMUSG00000112762	4930459C07Rik	1.19117	3.7559	1.37485	2.73186	0.00629786	0.0291225
ENSMUSG00000069372	Ctxn3	24.7935	3.75115	0.442525	8.4767	2.31665e-17	1.46952e-15
ENSMUSG00000102099	1700011B04Rik	1.18556	3.7434	1.86414	2.00811	0.0446314	0.136885
ENSMUSG00000029813	1600015I10Rik	2.81086	3.73575	1.11349	3.355	0.000793651	0.00507015
ENSMUSG00000045545	Krt14	8.35841	3.73512	0.827034	4.51628	6.29347e-06	7.18519e-05
ENSMUSG00000076533	Igkv4-90	1.17703	3.73481	1.89313	1.97282	0.0485162	0.145895
ENSMUSG00000059483	Gm5528	1.20195	3.73453	1.53862	2.42719	0.0152162	0.059581
ENSMUSG00000110123	Gm18562	1.87498	3.73329	1.18449	3.15181	0.0016226	0.00936092
ENSMUSG00000055415	Atp10b	977.092	3.72967	0.381877	9.76668	1.56503e-22	1.68766e-20
ENSMUSG00000102417	Gm36939	2.8003	3.72966	1.12702	3.3093	0.000935287	0.00583802
ENSMUSG00000104111	Gm37294	1.18622	3.72741	1.88726	1.97503	0.0482644	0.145381
ENSMUSG00000104068	Gm37199	2.79247	3.72635	1.74634	2.13381	0.0328582	0.107856
ENSMUSG00000086170	Gm12144	12.2025	3.71889	0.639002	5.81985	5.89016e-09	1.25926e-07
ENSMUSG00000098472	Gm27887	1.81603	3.70517	1.26033	2.93985	0.00328372	0.0170406
ENSMUSG00000113620	7420701I03Rik	2.79826	3.70316	1.11545	3.31988	0.000900567	0.00565798
ENSMUSG00000062296	Trank1	36.0695	3.6994	0.634925	5.82652	5.65944e-09	1.21379e-07
ENSMUSG00000076523	Igkv15-103	17.0096	3.69771	1.28775	2.87146	0.00408581	0.0203115
ENSMUSG00000082766	1700064H15Rik	6.66931	3.68904	0.809385	4.55782	5.16861e-06	6.01125e-05
ENSMUSG00000040694	Apobec2	52.1248	3.68191	0.351895	10.4631	1.27613e-25	1.89029e-23
ENSMUSG00000116814	AC154438.1	5.37998	3.67967	0.956673	3.84632	0.000119907	0.000990368
ENSMUSG00000044313	Mab21l3	165.474	3.67826	0.662517	5.55195	2.82502e-08	5.33705e-07
ENSMUSG00000021792	Fam213a	4325.75	3.6738	0.169355	21.6929	2.39276e-104	1.61266e-100
ENSMUSG00000042784	Muc1	1251.37	3.67132	0.286239	12.8261	1.17184e-37	4.5785e-35
ENSMUSG00000114828	AI463229	19.9711	3.66906	0.500583	7.32957	2.30887e-13	9.23512e-12
ENSMUSG00000090556	Olfr753-ps1	2.68733	3.66755	1.74728	2.09901	0.0358162	0.115485
ENSMUSG00000061780	Cfd	4.15554	3.66442	1.51227	2.42313	NA	NA
ENSMUSG00000091370	5730435O14Rik	1.80124	3.66409	1.21786	3.00863	0.0026243	0.0140962
ENSMUSG00000041301	Cftr	793.471	3.65736	0.543996	6.72314	1.77854e-11	5.5367e-10
ENSMUSG00000047441	Antxrl	11.746	3.65621	0.626581	5.83517	5.37351e-09	1.15892e-07
ENSMUSG00000107401	Gm6312	2.66401	3.65508	1.60096	2.28306	0.0224271	0.0805398
ENSMUSG00000061877	BC048679	1.73657	3.65259	1.36832	2.66939	0.00759886	0.0339675
ENSMUSG00000047501	Cldn4	269.141	3.64766	0.226196	16.1261	1.67174e-58	2.25343e-55
ENSMUSG00000029608	Rph3a	1.76995	3.64676	1.18855	3.06825	0.00215317	0.0119169
ENSMUSG00000060988	Galnt13	147.354	3.63449	0.44789	8.1147	4.86983e-16	2.6793e-14
ENSMUSG00000024411	Aqp4	1.09294	3.632	1.37674	2.63811	0.00833703	0.0366892
ENSMUSG00000027398	Il1b	125.094	3.63117	1.09512	3.31579	0.000913859	0.00572548
ENSMUSG00000021345	Prl8a6	17.0211	3.63101	0.582003	6.23883	4.40867e-10	1.10974e-08
ENSMUSG00000082215	Gm14314	1.09187	3.62824	1.50602	2.40915	0.0159896	0.0620683
ENSMUSG00000107956	Speer9-ps1	1.74215	3.62772	1.20605	3.00793	0.00263037	0.0141203
ENSMUSG00000018924	Alox15	194.221	3.62111	0.439231	8.24422	1.66241e-16	9.65881e-15
ENSMUSG00000036805	Noxa1	18.8211	3.62081	0.653167	5.54347	2.96539e-08	5.56127e-07
ENSMUSG00000098414	Mir6909	2.64199	3.61299	1.14334	3.16005	0.00157744	0.0091415
ENSMUSG00000104554	Gm4610	5.18348	3.60274	0.95111	3.78794	0.000151904	0.00121424
ENSMUSG00000087230	Mroh3	8.80625	3.5978	0.635152	5.66447	1.47483e-08	2.943e-07
ENSMUSG00000083561	Gm5942	1.68438	3.59474	1.36116	2.64093	0.00826779	0.0364202
ENSMUSG00000108163	Gm44431	1.08373	3.59391	1.82831	1.9657	0.0493328	0.147971
ENSMUSG00000089851	Gm16579	18.3985	3.58879	0.617743	5.80952	6.26533e-09	1.33313e-07
ENSMUSG00000028009	1700061I17Rik	1.08079	3.58298	1.53833	2.32913	0.0198522	0.0732597
ENSMUSG00000051748	Wfdc21	1.05643	3.57881	2.32341	1.54033	0.123481	0.290838
ENSMUSG00000028786	Tmem54	40.687	3.57838	0.352494	10.1516	3.25999e-24	4.18505e-22
ENSMUSG00000026985	Il1f8	117.077	3.56672	0.456369	7.81544	5.47693e-15	2.69439e-13
ENSMUSG00000102186	Gm37191	1.69428	3.56618	1.21349	2.93879	0.00329496	0.0170891
ENSMUSG00000028255	Clca1	36.2735	3.55864	0.45524	7.81707	5.40675e-15	2.66473e-13
ENSMUSG00000038754	Elovl3	8.60625	3.55631	0.8248	4.31172	1.61991e-05	0.000167997
ENSMUSG00000063354	Slc39a4	592.973	3.5481	0.265219	13.378	8.12838e-41	4.05802e-38
ENSMUSG00000103266	Gm36979	1.67805	3.54558	1.15871	3.05995	0.00221377	0.0121873
ENSMUSG00000028804	Csmd2	94.0519	3.54109	0.387628	9.13529	6.52325e-20	5.63655e-18
ENSMUSG00000109705	Gm19096	3.64236	3.53466	1.12295	3.14764	0.00164593	0.00947726
ENSMUSG00000084251	Gm12310	1.0325	3.53404	1.62984	2.16833	0.0301336	0.100928
ENSMUSG00000094194	Ighv5-16	5.96596	3.53067	0.900902	3.91903	8.89046e-05	0.000763062
ENSMUSG00000030827	Fgf21	1.02724	3.52642	1.36089	2.59126	0.00956254	0.0411684
ENSMUSG00000100798	Gm19589	1.02537	3.52445	1.3444	2.62158	0.00875234	0.0382422
ENSMUSG00000076462	Trbv2	1.02343	3.52406	1.86549	1.88908	0.0588807	0.169554
ENSMUSG00000043659	Npsr1	14.4141	3.52372	0.502614	7.01079	2.36982e-12	8.37325e-11
ENSMUSG00000072624	Gm5460	1.6341	3.5209	1.36997	2.57005	0.0101683	0.0432566
ENSMUSG00000095711	Trav14-2	1.00832	3.51005	1.3575	2.58568	0.0097187	0.0417248
ENSMUSG00000116651	AC122381.1	2.48656	3.50926	1.59032	2.20663	0.0273396	0.0937602
ENSMUSG00000079092	Prl2c2	5.89514	3.50847	0.923663	3.79843	0.000145616	0.0011687
ENSMUSG00000084902	Gm281	1.58711	3.50617	1.26342	2.77515	0.0055177	0.0260237
ENSMUSG00000042265	Trem1	13.6887	3.50236	1.41662	2.47234	0.0134231	0.054019
ENSMUSG00000106002	5430434I15Rik	0.996315	3.49851	1.3549	2.58211	0.00981997	0.042091
ENSMUSG00000113049	Gm48544	0.998477	3.49753	1.52143	2.29885	0.0215133	0.0779643
ENSMUSG00000098666	Mir6950	1.6003	3.49682	1.46654	2.3844	0.0171069	0.0654626
ENSMUSG00000078518	Gm13030	0.997378	3.49634	1.52118	2.29844	0.0215368	0.0780193
ENSMUSG00000095493	A630023A22Rik	8.22058	3.49499	0.665337	5.25295	1.4968e-07	2.43525e-06
ENSMUSG00000086733	Gm11685	0.989411	3.48579	1.62331	2.14734	0.0317662	0.105104
ENSMUSG00000102013	E330023G01Rik	1.56399	3.48547	1.30366	2.67361	0.00750389	0.0336038
ENSMUSG00000025279	Dnase1l3	26.2918	3.47894	0.809394	4.2982	1.72189e-05	0.000176974
ENSMUSG00000000901	Mmp11	935.891	3.47591	0.288804	12.0355	2.31155e-33	6.84802e-31
ENSMUSG00000115411	Gm6986	3.4238	3.46575	1.02676	3.37544	0.000736987	0.00475777
ENSMUSG00000042268	Slc26a9	4.70446	3.46293	0.952291	3.63642	0.000276454	0.00202892
ENSMUSG00000107480	Gm44165	1.53449	3.45998	1.60734	2.15261	0.0313491	0.103966
ENSMUSG00000087389	Gm15592	28.0772	3.45867	0.586393	5.89821	3.67468e-09	8.08041e-08
ENSMUSG00000115726	Gm30083	0.967849	3.45203	2.34278	1.47347	0.140624	0.317644
ENSMUSG00000005800	Mmp8	13.8552	3.44941	1.52788	2.25763	0.0239685	0.0847683
ENSMUSG00000021097	Clmn	498.383	3.44712	0.656567	5.25021	1.51922e-07	2.46876e-06
ENSMUSG00000117239	AC166110.3	3.42945	3.44495	1.16558	2.95557	0.00312094	0.0163405
ENSMUSG00000096506	CR974586.5	0.955295	3.43867	2.01301	1.70822	0.0875952	0.227175
ENSMUSG00000101659	Gm29009	1.55928	3.43842	1.17544	2.92523	0.003442	0.0176917
ENSMUSG00000096280	Gm23287	0.977168	3.43633	1.60944	2.1351	0.0327527	0.107649
ENSMUSG00000086381	AV064505	0.977168	3.43633	1.60944	2.1351	0.0327527	0.107649
ENSMUSG00000059334	Zfp36l3	3.38332	3.4362	1.03119	3.33227	0.000861405	0.00544441
ENSMUSG00000022123	Scel	118.784	3.43234	0.796935	4.30692	1.65543e-05	0.000171254
ENSMUSG00000100782	Gm28231	10.2971	3.42902	0.570964	6.00566	1.90549e-09	4.34972e-08
ENSMUSG00000114670	Gm18072	0.951294	3.42837	2.46698	1.38971	0.164618	0.353368
ENSMUSG00000035896	Rnase1	1.51043	3.42253	1.21018	2.82812	0.00468226	0.0227719
ENSMUSG00000022938	Fam3b	9.20832	3.41409	0.740904	4.60801	4.06538e-06	4.8495e-05
ENSMUSG00000073929	Trim30e-ps1	1.48498	3.4077	1.26697	2.68964	0.00715283	0.0323437
ENSMUSG00000029847	Slc23a4	78.5535	3.40415	0.42472	8.01504	1.10098e-15	5.76339e-14
ENSMUSG00000070960	Gm19680	3.29734	3.39785	1.02959	3.30019	0.00096621	0.00600878
ENSMUSG00000031844	Hsd17b2	47.2626	3.38638	0.293775	11.5271	9.63102e-31	2.07714e-28
ENSMUSG00000109294	Gm44808	0.934034	3.38358	1.37017	2.46947	0.0135314	0.0543495
ENSMUSG00000086321	Gm11413	0.93352	3.38306	1.37006	2.46928	0.0135386	0.05437
ENSMUSG00000045364	Ifne	47.7209	3.3654	0.33237	10.1255	4.2598e-24	5.36635e-22
ENSMUSG00000092021	Gbp11	25.403	3.36483	1.19146	2.82413	0.00474087	0.022996
ENSMUSG00000076474	Trbv17	1.44683	3.36413	1.95328	1.7223	0.0850161	0.22226
ENSMUSG00000035491	Fthl17a	3.24262	3.36373	1.0417	3.22907	0.00124192	0.00747506
ENSMUSG00000093862	Gm5117	3.23904	3.36093	1.07032	3.1401	0.00168889	0.00967712
ENSMUSG00000050359	Sprr1a	36.2296	3.3604	0.529715	6.34379	2.24185e-10	5.91369e-09
ENSMUSG00000100155	Gm2109	10.128	3.35783	1.02892	3.26346	0.00110061	0.00673431
ENSMUSG00000042360	4930433N12Rik	1.46285	3.35613	1.38298	2.42674	0.0152352	0.0596205
ENSMUSG00000114800	Gm31600	0.90337	3.35319	1.41369	2.37194	0.017695	0.0670472
ENSMUSG00000070564	Ntn5	0.899918	3.34975	1.39668	2.39837	0.0164682	0.0635974
ENSMUSG00000103354	Gm38083	5.44784	3.3479	0.756607	4.42489	9.6491e-06	0.000105658
ENSMUSG00000085502	Gm12320	0.898855	3.34622	1.53438	2.18083	0.0291959	0.0985097
ENSMUSG00000078605	E030025P04Rik	16.1763	3.34109	0.472518	7.07083	1.54015e-12	5.59581e-11
ENSMUSG00000074195	Clca4b	1.43872	3.3378	1.26026	2.64851	0.00808482	0.0357661
ENSMUSG00000040809	Chil3	85.7776	3.33691	1.29458	2.5776	0.00994894	0.0425533
ENSMUSG00000086962	Gm12248	131.759	3.32838	0.379074	8.7803	1.63043e-18	1.20424e-16
ENSMUSG00000024731	Ms4a10	2.21721	3.32579	1.16193	2.8623	0.0042058	0.0208044
ENSMUSG00000052270	Fpr2	56.167	3.32542	1.10148	3.01904	0.00253575	0.0136887
ENSMUSG00000115466	Vmn1r3	1.42852	3.32482	1.26871	2.62064	0.00877657	0.0383418
ENSMUSG00000044041	Krt13	2.2094	3.32461	1.45279	2.28844	0.022112	0.0796949
ENSMUSG00000093916	Gm379	1.41525	3.32205	1.23349	2.69321	0.00707679	0.032059
ENSMUSG00000111422	1700027J07Rik	14.5811	3.31941	0.646497	5.13445	2.82969e-07	4.3792e-06
ENSMUSG00000010601	Apol7a	105.038	3.31834	0.493044	6.73031	1.69297e-11	5.28863e-10
ENSMUSG00000040904	Gm21988	1.4097	3.31743	1.4037	2.36335	0.0181107	0.0682466
ENSMUSG00000024749	Tmc1	2.16786	3.31639	1.16495	2.8468	0.00441612	0.0217122
ENSMUSG00000095335	Igkv3-5	0.877221	3.30947	2.42137	1.36678	0.171696	0.363409
ENSMUSG00000076540	Igkv4-80	1.39484	3.30249	1.41831	2.32846	0.0198878	0.0733556
ENSMUSG00000048538	Gm9826	1.3954	3.30185	1.51708	2.17645	0.029522	0.0993374
ENSMUSG00000022582	Ly6g	0.865026	3.29651	1.94895	1.69143	0.0907552	0.233322
ENSMUSG00000026241	Nppc	63.1599	3.29538	0.282446	11.6673	1.87255e-31	4.46744e-29
ENSMUSG00000032500	Dclk3	71.4467	3.29212	0.816765	4.03068	5.56157e-05	0.000506535
ENSMUSG00000043727	F830045P16Rik	9.37102	3.2838	0.585711	5.60652	2.06432e-08	4.00661e-07
ENSMUSG00000105557	Mir3966	1.40562	3.28129	1.43224	2.29102	0.0219623	0.0792401
ENSMUSG00000014725	Adam28	136.356	3.27626	0.382435	8.56685	1.06356e-17	7.09718e-16
ENSMUSG00000111820	Gm36120	10.5941	3.26783	1.43548	2.27647	0.022818	0.0816067
ENSMUSG00000033213	AA467197	78.109	3.25413	0.986822	3.29759	0.000975195	0.00605349
ENSMUSG00000093504	Vmn1r-ps24	0.86056	3.25336	1.57767	2.06212	0.0391961	0.123549
ENSMUSG00000019232	Etnppl	116.938	3.24943	0.993746	3.26988	0.00107593	0.00660125
ENSMUSG00000022824	Muc13	21.3572	3.24665	0.610497	5.31805	1.04883e-07	1.7606e-06
ENSMUSG00000087792	Gm25968	0.858171	3.24405	1.43091	2.26712	0.0233829	0.0831635
ENSMUSG00000116593	AC166572.1	0.852557	3.24282	1.57593	2.05772	0.039617	0.124581
ENSMUSG00000115908	Cyp2d35-ps	0.851494	3.24144	1.57571	2.05714	0.0396731	0.1247
ENSMUSG00000111102	Gm48189	2.07339	3.22727	1.11675	2.88988	0.00385384	0.0193475
ENSMUSG00000028262	Clca3a2	25.0269	3.22698	0.47391	6.80927	9.80933e-12	3.14821e-10
ENSMUSG00000117465	AC102496.1	136.355	3.22625	0.490202	6.58147	4.65817e-11	1.37246e-09
ENSMUSG00000080767	Gm15595	6.05474	3.21889	0.7995	4.02613	5.6703e-05	0.000514526
ENSMUSG00000038415	Foxq1	12.7719	3.21586	0.552533	5.8202	5.87761e-09	1.25758e-07
ENSMUSG00000076848	Trav15-2-dv6-2	0.828344	3.21539	1.87206	1.71757	0.0858749	NA
ENSMUSG00000018589	Glra2	0.830733	3.21317	1.39264	2.30726	0.0210404	NA
ENSMUSG00000026602	Nphs2	0.828057	3.21216	1.52703	2.10353	0.0354191	NA
ENSMUSG00000071719	Tmem28	2.01691	3.21215	1.14397	2.80789	0.00498679	0.0239795
ENSMUSG00000043705	Capn13	1.31246	3.20573	1.25383	2.55675	0.0105655	0.044554
ENSMUSG00000087265	Gm12349	0.815813	3.19861	1.56977	2.03763	0.0415867	NA
ENSMUSG00000109915	7420700N18Rik	4.09357	3.19818	1.00388	3.18582	0.00144343	0.00848343
ENSMUSG00000032948	Lipi	0.813686	3.19572	1.63141	1.95887	0.0501279	NA
ENSMUSG00000034438	Gbp8	255.074	3.19528	1.10574	2.88972	0.00385586	0.019354
ENSMUSG00000088342	Gm22340	2.87751	3.19502	1.07509	2.97187	0.00295994	0.0156118
ENSMUSG00000104173	Gm37703	1.29888	3.19372	1.39777	2.28487	0.0223205	0.0802853
ENSMUSG00000036899	Trpv5	17.471	3.19104	0.475951	6.70456	2.02018e-11	6.26e-10
ENSMUSG00000102095	C730036E19Rik	0.802231	3.18271	1.42157	2.23888	0.025164	NA
ENSMUSG00000067813	Xkr9	1.97107	3.18126	1.31143	2.4258	0.0152749	0.0597497
ENSMUSG00000085451	Gm40614	3.91561	3.17633	0.968025	3.28125	0.0010335	0.00636556
ENSMUSG00000023078	Cxcl13	2.79475	3.17541	1.28639	2.46846	0.0135696	0.05446
ENSMUSG00000026285	Pdcd1	8.62773	3.1743	0.895315	3.54546	0.000391932	0.00274495
ENSMUSG00000068099	1500009C09Rik	0.79768	3.17384	1.62872	1.94867	0.0513353	NA
ENSMUSG00000024734	Zp1	2.01122	3.17286	1.18621	2.67479	0.00747755	0.0335406
ENSMUSG00000076548	Igkv4-69	0.798791	3.17003	3.07002	1.03258	0.301801	NA
ENSMUSG00000113224	Gm48444	10.7619	3.15883	0.547296	5.77171	7.84713e-09	1.6336e-07
ENSMUSG00000037469	Acp7	0.789164	3.15715	2.03541	1.55112	0.120874	NA
ENSMUSG00000027356	Fermt1	680.269	3.15392	0.315058	10.0106	1.36903e-23	1.64767e-21
ENSMUSG00000107822	Olfr1358	1.29408	3.15205	1.4262	2.21011	0.0270978	0.0932036
ENSMUSG00000037716	Ccdc33	4.74992	3.14894	0.871445	3.61347	0.000302131	0.00218956
ENSMUSG00000026639	Lamb3	386.156	3.14842	0.365157	8.62211	6.57318e-18	4.52034e-16
ENSMUSG00000037411	Serpine1	1793.2	3.14766	0.264167	11.9154	9.83673e-33	2.7339e-30
ENSMUSG00000081245	Gm6587	2.94757	3.14743	1.0814	2.91052	0.00360834	0.0183861
ENSMUSG00000115704	Gm49171	1.28607	3.14437	1.42441	2.20749	0.0272797	0.0936226
ENSMUSG00000112452	Gm48075	0.782282	3.14431	2.45453	1.28103	0.200185	NA
ENSMUSG00000042244	Pglyrp3	0.782437	3.1442	2.52246	1.24648	0.212587	NA
ENSMUSG00000026180	Cxcr2	27.3528	3.14398	0.806708	3.8973	9.72709e-05	0.000826972
ENSMUSG00000114055	Gm32089	0.776083	3.1395	1.93597	1.62167	0.104874	NA
ENSMUSG00000114871	Gm21370	1.24873	3.13914	1.68646	1.86138	0.0626911	0.177942
ENSMUSG00000114985	1810028F09Rik	0.769179	3.12831	1.96322	1.59346	0.111057	NA
ENSMUSG00000109819	B930018H19Rik	1.25768	3.11568	1.28474	2.42514	0.0153025	0.0598403
ENSMUSG00000086187	Gm12860	14.9468	3.11527	0.510515	6.1022	1.04617e-09	2.49589e-08
ENSMUSG00000032357	Tinag	46.4556	3.10914	0.391977	7.93195	2.15735e-15	1.09529e-13
ENSMUSG00000063727	Tnfrsf11b	1706.66	3.10357	0.196959	15.7574	6.10616e-56	6.33138e-53
ENSMUSG00000042734	Ttc9	319.86	3.09811	0.15602	19.8572	9.55406e-88	4.2928e-84
ENSMUSG00000025068	Gsto1	6579.95	3.09381	0.283178	10.9253	8.72485e-28	1.53734e-25
ENSMUSG00000019997	Ctgf	4938.75	3.08894	0.26579	11.6217	3.19641e-31	7.30271e-29
ENSMUSG00000007908	Hmgcll1	45.6796	3.08804	0.289449	10.6687	1.42614e-26	2.24839e-24
ENSMUSG00000074489	Bglap3	10.1805	3.08457	0.593126	5.20053	1.98719e-07	3.16999e-06
ENSMUSG00000039508	Calhm4	1.89625	3.08346	1.16224	2.65304	0.00797703	0.0353531
ENSMUSG00000105703	Gm43305	322.099	3.08038	0.583351	5.28049	1.28837e-07	2.12695e-06
ENSMUSG00000078249	Hmga1b	1.21847	3.07857	1.27502	2.41453	0.0157557	0.0613457
ENSMUSG00000104725	Gm2860	0.757809	3.07538	1.96493	1.56514	0.117551	NA
ENSMUSG00000085477	Gm13335	6.15377	3.07107	0.822453	3.73403	0.000188437	0.00146021
ENSMUSG00000066363	Serpina3f	71.2445	3.06993	1.36247	2.25322	0.0242452	0.0854298
ENSMUSG00000098509	Rgs21	0.757773	3.06696	1.6507	1.85798	0.0631722	NA
ENSMUSG00000066652	Lefty2	1.21605	3.06649	1.27069	2.41325	0.015811	0.0615165
ENSMUSG00000094230	Gm21847	10.9881	3.05525	0.58072	5.26115	1.43159e-07	2.34047e-06
ENSMUSG00000076916	Traj13	1.20357	3.05464	1.31443	2.32393	0.020129	0.0739821
ENSMUSG00000025746	Il6	10.75	3.05377	0.707872	4.31402	1.60314e-05	0.000166355
ENSMUSG00000051225	Fam83a	1.86661	3.04885	1.21511	2.50912	0.0121033	0.0496794
ENSMUSG00000068950	Olfr338	0.739437	3.04694	1.98284	1.53666	0.124377	NA
ENSMUSG00000097172	4930444M15Rik	0.738851	3.04524	1.91852	1.58729	0.112448	NA
ENSMUSG00000106707	Gm43748	5.37039	3.04403	0.885631	3.43713	0.000587908	0.00390572
ENSMUSG00000106647	Gm42523	0.737274	3.04267	1.91846	1.586	0.11274	NA
ENSMUSG00000022651	Retnlg	14.1134	3.0426	1.4871	2.046	0.0407569	0.127363
ENSMUSG00000097679	Rps19-ps5	1.1694	3.04205	1.37518	2.21211	0.0269592	0.0928572
ENSMUSG00000107992	Gm44223	0.739401	3.04076	1.60466	1.89496	0.0580977	NA
ENSMUSG00000065524	Mir135a-2	1.8006	3.03673	1.26723	2.39634	0.0165596	0.0638579
ENSMUSG00000027902	Chil6	20.4547	3.03627	0.534349	5.68219	1.32979e-08	2.67937e-07
ENSMUSG00000000544	Gpa33	9.6149	3.03228	0.676527	4.48212	7.39041e-06	8.27744e-05
ENSMUSG00000113796	Gm36426	8.80481	3.02962	0.645845	4.69094	2.7195e-06	3.40683e-05
ENSMUSG00000095134	Mid1-ps1	2.61341	3.02684	1.44542	2.09409	0.036252	0.116611
ENSMUSG00000087273	Gm13203	1.15958	3.02661	1.68532	1.79586	0.0725161	0.197922
ENSMUSG00000086999	Bcas1os2	4.46013	3.02461	0.795853	3.80046	0.000144428	0.0011609
ENSMUSG00000065328	Gm22053	1.19529	3.02363	1.45063	2.08436	0.0371272	0.118662
ENSMUSG00000098664	Gm27588	2.63065	3.0204	1.12904	2.67518	0.00746881	0.0335248
ENSMUSG00000112106	Gm47026	36.4011	3.01908	0.489457	6.16823	6.90585e-10	1.70023e-08
ENSMUSG00000110899	Gm48840	1.76403	3.01328	1.28849	2.33861	0.0193555	0.071806
ENSMUSG00000106429	Gm10685	0.711998	3.00281	1.70559	1.76057	0.0783115	NA
ENSMUSG00000074872	Ctxn2	0.711449	3.00249	1.48226	2.02561	0.0428048	NA
ENSMUSG00000089698	Gm2541	0.711413	3.00202	1.64487	1.82508	0.0679895	NA
ENSMUSG00000047517	Dmbt1	2.59508	3.00184	1.03359	2.90429	0.00368085	0.0186737
ENSMUSG00000063522	2010109I03Rik	21.279	3.0006	0.651041	4.60893	4.04748e-06	4.83028e-05
ENSMUSG00000087485	Gm13383	0.70906	2.99862	1.60002	1.87411	0.0609147	NA
ENSMUSG00000067028	Cntnap5b	0.707447	2.99739	1.44682	2.07171	0.0382926	NA
ENSMUSG00000053338	Tarm1	22.385	2.99632	0.773524	3.87359	0.000107242	0.000897036
ENSMUSG00000081513	Gm11623	0.706384	2.99444	1.64413	1.82129	0.0685632	NA
ENSMUSG00000085290	Gm16129	11.1735	2.99149	0.563617	5.30767	1.11036e-07	1.85237e-06
ENSMUSG00000072791	Abcb5	2.57432	2.98469	1.11879	2.66779	0.00763525	0.0340911
ENSMUSG00000039364	Sectm1b	74.4382	2.98165	0.923906	3.22723	0.00124997	0.00751605
ENSMUSG00000029379	Cxcl3	1.72518	2.97489	1.965	1.51394	0.130041	0.301054
ENSMUSG00000112522	Gm47632	0.709898	2.97462	2.56772	1.15847	0.246673	NA
ENSMUSG00000049758	Olfr1318	2.62193	2.97097	1.03349	2.87469	0.00404429	0.0201386
ENSMUSG00000032556	Bfsp2	0.691978	2.97078	1.91875	1.54829	0.121554	NA
ENSMUSG00000024063	Lbh	1550.28	2.97075	0.199767	14.8711	5.08051e-50	3.80459e-47
ENSMUSG00000107015	2900076G11Rik	1.74782	2.96982	1.16353	2.55242	0.0106978	0.0450276
ENSMUSG00000113455	Gm48825	0.692013	2.96941	2.05442	1.44538	0.148352	NA
ENSMUSG00000116973	AC125371.3	0.691428	2.9691	1.98461	1.49606	0.134637	NA
ENSMUSG00000105277	Gm9504	1.73919	2.96472	1.21764	2.43481	0.0148994	0.0585615
ENSMUSG00000024256	Adcyap1	0.683461	2.9635	1.59677	1.85594	0.0634622	NA
ENSMUSG00000087600	Pmepa1os	1.7444	2.96069	1.18304	2.50262	0.0123279	0.050394
ENSMUSG00000075225	Ccdc162	130.955	2.96024	0.452954	6.53542	6.34309e-11	1.83283e-09
ENSMUSG00000025328	Padi3	6.77328	2.95566	0.851418	3.47146	0.000517646	0.00349667
ENSMUSG00000048528	Nkx1-2	0.681848	2.95359	1.91844	1.53958	0.123664	NA
ENSMUSG00000044542	Prop1	1.13114	2.95296	1.26061	2.34249	0.0191554	0.0712388
ENSMUSG00000055177	Cstl1	1.72082	2.95126	1.26262	2.3374	0.0194184	0.0719885
ENSMUSG00000112266	Gm48843	1.72006	2.95123	1.26267	2.33729	0.0194242	0.0720001
ENSMUSG00000110730	Gm19385	1.12117	2.95094	1.3442	2.1953	0.0281419	0.0959138
ENSMUSG00000102537	Gm37224	1.12172	2.95085	1.29751	2.27425	0.0229511	0.0819629
ENSMUSG00000086443	4933421A08Rik	5.09848	2.95023	0.713299	4.13604	3.53349e-05	0.00033732
ENSMUSG00000115489	Gm49129	2.52126	2.94804	1.09672	2.68804	0.00718719	0.0324665
ENSMUSG00000061724	Gm2423	1.72532	2.9474	1.20802	2.43986	0.0146931	0.0579108
ENSMUSG00000110055	Gm18857	1.70666	2.94645	1.19159	2.4727	0.0134095	0.0539804
ENSMUSG00000041324	Inhba	1184.5	2.94557	0.306959	9.59597	8.31315e-22	8.55397e-20
ENSMUSG00000076480	Trbv29	0.680749	2.94522	2.49929	1.17842	0.23863	NA
ENSMUSG00000037145	2210407C18Rik	1.69951	2.94395	1.20828	2.43648	0.014831	0.0583435
ENSMUSG00000096140	Ankrd66	2.43898	2.94177	1.15838	2.53955	0.0110995	0.0463351
ENSMUSG00000085472	Gm15691	2.59339	2.94152	1.29025	2.27981	0.022619	0.0810779
ENSMUSG00000029380	Cxcl1	36.8098	2.93675	0.941364	3.11968	0.00181049	0.0102864
ENSMUSG00000045551	Fpr1	43.8551	2.93484	1.31922	2.22468	0.0261025	0.0905311
ENSMUSG00000104713	Gbp6	223.686	2.93452	0.97009	3.02499	0.00248638	0.0134437
ENSMUSG00000097299	Gm26654	2.54146	2.93436	1.00935	2.90718	0.00364704	0.0185441
ENSMUSG00000065905	Gm26110	0.673845	2.93229	2.47826	1.1832	0.236729	NA
ENSMUSG00000101394	Gm28183	1.11624	2.92948	1.29053	2.26999	0.0232081	0.0827057
ENSMUSG00000021348	Prl7d1	7.58563	2.92802	0.884207	3.31146	0.000928109	0.00579993
ENSMUSG00000078922	Tgtp1	329.275	2.92706	0.936097	3.12688	0.00176673	0.0100696
ENSMUSG00000096035	Odaph	64.8893	2.92697	0.264673	11.0588	1.98646e-28	3.71896e-26
ENSMUSG00000113757	Gm47507	0.670393	2.92548	2.50295	1.16881	0.242479	NA
ENSMUSG00000055780	Usp26	0.670393	2.92548	2.50295	1.16881	0.242479	NA
ENSMUSG00000086932	Gm22000	7.46726	2.92441	0.581212	5.03156	4.86501e-07	7.1709e-06
ENSMUSG00000112854	Gm38403	27.3298	2.92083	0.335438	8.70749	3.10681e-18	2.19258e-16
ENSMUSG00000040808	S100g	1530.22	2.91837	0.390224	7.47872	7.50499e-14	3.19128e-12
ENSMUSG00000092618	Btnl6	0.666941	2.91822	2.57121	1.13496	0.256392	NA
ENSMUSG00000060738	Prl7c1	0.678459	2.91413	2.51756	1.15753	0.247058	NA
ENSMUSG00000116287	Gm3924	0.683523	2.91385	2.07144	1.40668	0.159524	NA
ENSMUSG00000040569	Slc26a7	57.5851	2.91113	0.29683	9.8074	1.04628e-22	1.15601e-20
ENSMUSG00000083695	Rnf138rt1	1.08882	2.91056	1.68323	1.72915	0.0837817	0.21992
ENSMUSG00000062991	Nrg1	1515.32	2.90876	0.196466	14.8054	1.3519e-49	9.85024e-47
ENSMUSG00000094868	Dlx6os2	1.07245	2.90819	1.35067	2.15315	0.0313067	0.103851
ENSMUSG00000075611	Gm11545	8.0563	2.90743	0.640856	4.53679	5.71157e-06	6.58122e-05
ENSMUSG00000093458	Gm20688	1.64158	2.90103	1.32179	2.19477	0.0281803	0.0959838
ENSMUSG00000089938	Gm15744	1.71947	2.90017	1.40207	2.06849	0.0385936	0.122131
ENSMUSG00000116395	Gm49499	4.9029	2.89962	0.730482	3.96946	7.20363e-05	0.000636008
ENSMUSG00000026981	Il1rn	77.795	2.897	0.76686	3.77774	0.000158261	0.00125746
ENSMUSG00000050157	Gm867	8.92645	2.89681	0.603603	4.7992	1.59299e-06	2.10105e-05
ENSMUSG00000074465	Gm10701	38.4123	2.89506	0.299949	9.65184	4.8281e-22	5.04499e-20
ENSMUSG00000063234	Gpr84	8.44744	2.89291	2.31326	1.25058	0.211088	0.418652
ENSMUSG00000101304	Plet1os	43.7119	2.89226	0.413755	6.99027	2.74358e-12	9.60573e-11
ENSMUSG00000025930	Msc	122.573	2.8907	0.251225	11.5064	1.2244e-30	2.59909e-28
ENSMUSG00000049420	Tmem200a	232.852	2.89067	0.307212	9.40937	4.99141e-21	4.77175e-19
ENSMUSG00000096878	Gm21083	10.4948	2.8875	0.546624	5.28243	1.2748e-07	2.10584e-06
ENSMUSG00000031444	F10	34.3136	2.88698	1.1871	2.43197	0.0150172	0.0589298
ENSMUSG00000104365	4930470B04Rik	10.7932	2.88583	0.695244	4.15082	3.31287e-05	0.00031891
ENSMUSG00000016496	Cd274	259.042	2.88167	1.03526	2.78352	0.0053773	0.0255043
ENSMUSG00000104733	Gm29784	0.664602	2.87886	2.01259	1.43043	0.152594	NA
ENSMUSG00000105054	Gm43664	1.09217	2.87852	1.505	1.91263	0.0557953	0.162667
ENSMUSG00000088360	Gm23500	1.69626	2.87514	1.18709	2.422	0.0154354	0.0602901
ENSMUSG00000096730	Vmn2r122	0.661926	2.87391	2.01268	1.4279	0.153321	NA
ENSMUSG00000081618	5033423K11Rik	2.36206	2.87359	1.13283	2.53664	0.0111921	0.046643
ENSMUSG00000027022	Xirp2	2.42881	2.87141	1.1025	2.60446	0.00920192	0.0398257
ENSMUSG00000033508	Asprv1	14.0944	2.87019	0.671135	4.27662	1.89749e-05	0.000192672
ENSMUSG00000085418	Grip1os1	13.5454	2.86654	0.531249	5.39585	6.81982e-08	1.19309e-06
ENSMUSG00000097923	Gm26577	13.2406	2.85528	0.694943	4.10866	3.97966e-05	0.000376977
ENSMUSG00000112630	Gm36908	0.640651	2.83595	2.01419	1.40799	0.159134	NA
ENSMUSG00000047641	Krt87	94.1361	2.83129	0.243507	11.6271	2.99968e-31	6.91182e-29
ENSMUSG00000115207	Gm49132	3.89881	2.82918	0.948673	2.98225	0.00286135	0.0151699
ENSMUSG00000070661	Rnf186	14.4164	2.8269	0.740732	3.81637	0.000135432	0.00109808
ENSMUSG00000073928	Olfr651	1.06672	2.82688	1.41887	1.99235	0.0463325	0.140884
ENSMUSG00000084093	Gm16418	0.637713	2.82393	1.6804	1.68051	0.0928576	NA
ENSMUSG00000042385	Gzmk	2.32538	2.82261	1.53245	1.84189	0.0654907	0.183664
ENSMUSG00000030651	Art2b	10.9383	2.82088	0.873356	3.22993	0.00123819	0.00745766
ENSMUSG00000098207	Arl14	5.38381	2.82051	0.742074	3.80085	0.000144199	0.00115975
ENSMUSG00000055976	Cldn23	54.9635	2.8178	0.467053	6.03315	1.60796e-09	3.72093e-08
ENSMUSG00000116929	AC164088.2	0.632098	2.81441	1.67972	1.67553	0.0938311	NA
ENSMUSG00000111575	Gm47926	1.58362	2.80194	1.34325	2.08593	0.0369846	0.118318
ENSMUSG00000022015	Tnfsf11	3.0339	2.80062	1.00487	2.78706	0.00531889	0.0252717
ENSMUSG00000075217	4833423E24Rik	347.357	2.80022	0.175625	15.9443	3.12054e-57	3.36507e-54
ENSMUSG00000116812	AC183097.2	5.3139	2.80017	0.675955	4.14255	3.43473e-05	0.000329058
ENSMUSG00000021101	4930408O17Rik	6.83212	2.79965	0.888139	3.15227	0.00162008	0.00934856
ENSMUSG00000086775	Snhg7os	19.7586	2.79574	0.386975	7.2246	5.02589e-13	1.94116e-11
ENSMUSG00000076441	Ass1	247.832	2.79572	0.327288	8.54209	1.3182e-17	8.66767e-16
ENSMUSG00000039384	Dusp10	278.217	2.79363	0.171866	16.2547	2.06896e-59	2.93564e-56
ENSMUSG00000112737	Gm4898	4.53948	2.79079	0.806041	3.46235	0.00053549	0.00360007
ENSMUSG00000104397	Gm37958	0.615601	2.7903	2.07876	1.34229	0.179503	NA
ENSMUSG00000101330	Gm10193	0.615565	2.78938	1.72263	1.61925	0.105393	NA
ENSMUSG00000086785	Gm6081	3.03582	2.78884	0.918872	3.03506	0.00240484	0.0130789
ENSMUSG00000031958	Ldhd	565.009	2.78524	0.310671	8.96526	3.0955e-19	2.5136e-17
ENSMUSG00000079363	Gbp4	1516.93	2.78422	0.991367	2.80846	0.00497786	0.0239502
ENSMUSG00000114546	Gm49350	0.612114	2.78321	1.50801	1.84563	0.0649465	NA
ENSMUSG00000049093	Il23r	14.3668	2.78291	0.496388	5.60631	2.06688e-08	4.00871e-07
ENSMUSG00000025431	Crisp1	1.01907	2.78084	1.29684	2.14431	0.0320079	0.105735
ENSMUSG00000072244	Trim6	103.725	2.78013	0.233015	11.9312	8.14384e-33	2.28698e-30
ENSMUSG00000085993	Gm15905	0.609725	2.77919	1.67821	1.65605	0.0977122	NA
ENSMUSG00000115077	Gm46455	0.609211	2.77833	1.67816	1.65558	0.097807	NA
ENSMUSG00000083127	Gm15189	0.608662	2.77801	1.50763	1.84264	0.0653818	NA
ENSMUSG00000103440	Gm37131	0.992077	2.77151	1.46273	1.89475	0.0581253	0.167775
ENSMUSG00000050066	A130023I24Rik	0.985251	2.77054	1.33756	2.07134	0.0383267	0.121473
ENSMUSG00000103067	Gm30414	61.2757	2.76882	0.418531	6.61558	3.70087e-11	1.10857e-09
ENSMUSG00000078365	Mos	0.604146	2.7679	2.01715	1.37218	0.170007	NA
ENSMUSG00000034226	Rhov	2.2707	2.76647	1.29238	2.1406	0.0323065	0.106545
ENSMUSG00000111085	Gm7607	0.603047	2.76577	2.01725	1.37106	0.170357	NA
ENSMUSG00000114724	Gm47751	0.603047	2.76577	2.01725	1.37106	0.170357	NA
ENSMUSG00000093966	Trav4-3	0.603047	2.76577	2.01725	1.37106	0.170357	NA
ENSMUSG00000083428	Gm14591	6.03223	2.76508	0.658528	4.19888	2.68237e-05	0.000263535
ENSMUSG00000030144	Clec4d	72.4372	2.76233	0.995537	2.77472	0.00552494	0.0260488
ENSMUSG00000090113	Nhlrc4	2.22269	2.76064	1.04927	2.63102	0.00851289	0.0373412
ENSMUSG00000088562	Gm23780	2.23719	2.76023	1.05334	2.62046	0.00878106	0.0383553
ENSMUSG00000109325	Krt8-ps	2.21604	2.7588	1.11619	2.47163	0.0134499	0.0541028
ENSMUSG00000100917	Gm18751	0.985218	2.75306	1.71244	1.60769	0.107904	0.264814
ENSMUSG00000112188	Gm47708	0.595354	2.75295	2.0187	1.36373	0.172653	NA
ENSMUSG00000113845	Gm39473	2.25637	2.7511	1.13294	2.42828	0.0151706	0.0594368
ENSMUSG00000111858	Gm48277	0.596143	2.74924	2.61456	1.05151	0.293024	NA
ENSMUSG00000102574	Gm33206	4.49481	2.7476	0.806826	3.40544	0.000660576	0.00431892
ENSMUSG00000000567	Sox9	233.582	2.74605	0.344845	7.96314	1.67732e-15	8.66264e-14
ENSMUSG00000088453	Gm25706	0.591579	2.74486	2.08243	1.3181	0.187469	NA
ENSMUSG00000073012	Fnd3c2	13.2777	2.74345	0.564862	4.85685	1.19267e-06	1.62554e-05
ENSMUSG00000101564	Gm5703	7.59865	2.74338	0.922513	2.97381	0.0029413	0.0155326
ENSMUSG00000078869	Gm14409	0.587901	2.73825	2.01944	1.35595	0.175115	NA
ENSMUSG00000055030	Sprr2e	0.587578	2.73683	2.083	1.31389	0.188883	NA
ENSMUSG00000112555	Gm47027	34.7636	2.73572	0.48105	5.68698	1.29308e-08	2.6092e-07
ENSMUSG00000094509	Ighv14-1	0.585738	2.73477	1.97076	1.38767	0.165237	NA
ENSMUSG00000089950	Gm16215	0.586514	2.73472	2.08316	1.31277	0.18926	NA
ENSMUSG00000105650	Gm42889	0.583612	2.73066	1.97093	1.38547	0.165909	NA
ENSMUSG00000035638	Muc20	215.89	2.73053	0.599763	4.55269	5.29654e-06	6.13883e-05
ENSMUSG00000045761	Togaram2	5.06685	2.72986	0.721582	3.78316	0.000154851	0.00123473
ENSMUSG00000047798	Cd300lf	64.9792	2.72962	1.05362	2.5907	0.00957797	0.0412151
ENSMUSG00000106059	Gm9364	1.50417	2.72715	1.23542	2.20746	0.0272821	0.0936226
ENSMUSG00000046687	Gm5424	2.91256	2.7256	0.924729	2.94746	0.00320392	0.016694
ENSMUSG00000110587	Gm7344	2.13354	2.72557	1.16396	2.34163	0.0191995	0.0713832
ENSMUSG00000104823	Gm43182	10.3952	2.72496	0.977531	2.78759	0.0053101	0.0252355
ENSMUSG00000103768	Gm37856	1.47813	2.72197	1.22345	2.22483	0.0260924	0.0905076
ENSMUSG00000095285	Ighv5-9	6.59069	2.72141	1.40028	1.94347	NA	NA
ENSMUSG00000076890	Traj40	0.579061	2.71405	2.54425	1.06674	0.28609	NA
ENSMUSG00000044330	Gm9790	0.576158	2.71376	2.08472	1.30173	0.193007	NA
ENSMUSG00000034917	Tjp3	405.099	2.71285	0.325662	8.33027	8.06605e-17	4.84304e-15
ENSMUSG00000045502	Hcar2	22.4051	2.71188	0.563921	4.80897	1.51706e-06	2.01272e-05
ENSMUSG00000104188	Gm37821	5.14763	2.71048	0.924609	2.93149	0.00337341	0.0174088
ENSMUSG00000107546	Gm20560	3.68014	2.70888	0.815836	3.32037	0.000898968	0.00565057
ENSMUSG00000031098	Syt8	12.4189	2.70782	0.450645	6.00877	1.86936e-09	4.27448e-08
ENSMUSG00000063060	Sox7	241.543	2.70764	0.297327	9.10661	8.49937e-20	7.25109e-18
ENSMUSG00000077138	Gm23577	0.575609	2.70631	2.56161	1.05649	0.290746	NA
ENSMUSG00000022900	Ildr1	287.989	2.7056	0.371925	7.27459	3.47465e-13	1.3655e-11
ENSMUSG00000054258	Gm5082	4.40802	2.70364	0.738487	3.66105	0.000251181	0.00186843
ENSMUSG00000090254	Gm1965	8.89165	2.70239	0.598441	4.51571	6.31058e-06	7.19961e-05
ENSMUSG00000075010	AW112010	371.473	2.70134	0.993026	2.72031	0.00652198	0.0299584
ENSMUSG00000055763	Rybp-ps	0.977398	2.70093	1.50091	1.79953	0.0719352	0.196624
ENSMUSG00000046623	Gjb4	12.2735	2.69961	0.481413	5.60768	2.05061e-08	3.98288e-07
ENSMUSG00000100108	Gm28100	0.572157	2.69805	2.62714	1.02699	0.304426	NA
ENSMUSG00000038591	Colec10	5.06525	2.69694	0.717439	3.75912	0.000170511	0.00133823
ENSMUSG00000024036	Slc37a1	190.076	2.69679	0.233737	11.5377	8.5163e-31	1.85154e-28
ENSMUSG00000113534	Gm19163	0.968267	2.69464	1.50073	1.79555	0.0725663	0.197964
ENSMUSG00000085218	BB218582	2.21081	2.69452	1.38488	1.94567	0.0516941	0.153432
ENSMUSG00000040969	Arhgef38	220.624	2.69428	0.295682	9.11207	8.08246e-20	6.93933e-18
ENSMUSG00000095583	Ighv14-2	1.46436	2.69169	1.36707	1.96895	0.0489588	0.147062
ENSMUSG00000105704	Gm43055	4.28836	2.68644	0.796167	3.37422	0.000740262	0.00477205
ENSMUSG00000090709	Gm17173	3.48572	2.68593	0.977774	2.74698	0.00601459	0.0279902
ENSMUSG00000070533	Wfdc8	13.2009	2.68376	0.591966	4.53363	5.79779e-06	6.66252e-05
ENSMUSG00000047228	A2ml1	0.952571	2.6827	1.64271	1.6331	0.102448	0.254623
ENSMUSG00000024770	Lipn	0.951071	2.6762	1.64067	1.63117	0.102856	0.255348
ENSMUSG00000063388	BC023105	53.5785	2.67209	0.879041	3.03978	0.00236748	0.0129122
ENSMUSG00000084875	4930570D08Rik	0.94886	2.66669	1.47968	1.8022	0.0715138	0.195829
ENSMUSG00000115979	Gm49410	2.72217	2.66654	1.53472	1.73747	0.0823037	0.216894
ENSMUSG00000024401	Tnf	40.904	2.66577	0.707332	3.76877	0.000164055	0.00129321
ENSMUSG00000079451	Tmprss11g	90.0646	2.66535	0.39902	6.67975	2.39346e-11	7.35751e-10
ENSMUSG00000112515	Gm4928	1.46553	2.66524	1.27737	2.08651	0.0369323	0.118207
ENSMUSG00000076563	Igkv5-48	7.07544	2.66347	0.934679	2.84961	0.0043773	0.0215539
ENSMUSG00000112741	Gm47341	38.5242	2.6609	0.559995	4.75164	2.01772e-06	2.60391e-05
ENSMUSG00000028040	Efna4	54.5907	2.65869	0.27126	9.80129	1.11157e-22	1.22313e-20
ENSMUSG00000063851	Rnf183	31.6874	2.6581	0.365418	7.27415	3.48615e-13	1.36802e-11
ENSMUSG00000098979	Gm27544	2.93898	2.65644	1.13867	2.33294	0.0196514	0.0726724
ENSMUSG00000115354	Gm49083	1.44877	2.6555	1.20684	2.20037	0.0277809	0.0949114
ENSMUSG00000030747	Dgat2	328.092	2.65531	0.25565	10.3865	2.85642e-25	4.05295e-23
ENSMUSG00000019982	Myb	431.271	2.65486	0.383035	6.9311	4.17571e-12	1.42678e-10
ENSMUSG00000045314	Sowahb	37.3434	2.65483	0.318973	8.32305	8.57263e-17	5.12438e-15
ENSMUSG00000029755	Dlx5	63.6752	2.65294	0.373989	7.09364	1.30629e-12	4.77831e-11
ENSMUSG00000080936	Olfr337-ps1	0.931409	2.65174	1.65498	1.60228	0.109093	0.266762
ENSMUSG00000112134	Gm40723	2.03714	2.649	1.14595	2.31161	0.020799	0.0759991
ENSMUSG00000067206	Lrrc66	7.71871	2.64716	0.563521	4.69753	2.6332e-06	3.30949e-05
ENSMUSG00000032068	Plet1	2138.75	2.64642	0.537133	4.92693	8.35297e-07	1.16799e-05
ENSMUSG00000050345	4930486L24Rik	0.926422	2.64539	1.4427	1.83363	0.0667083	0.186191
ENSMUSG00000097789	Gm2115	18.2553	2.64299	0.357119	7.40087	1.35293e-13	5.56848e-12
ENSMUSG00000028270	Gbp2	3647.93	2.64227	0.944972	2.79614	0.00517169	0.0247249
ENSMUSG00000112287	Gm47024	62.9154	2.64169	0.474182	5.57105	2.53212e-08	4.84482e-07
ENSMUSG00000041754	Trem3	2.67056	2.64136	1.72921	1.52749	0.126638	0.295562
ENSMUSG00000007034	Slc44a4	373.675	2.63923	0.243446	10.8412	2.19691e-27	3.63353e-25
ENSMUSG00000109649	Gm45521	0.944494	2.63795	1.43589	1.83716	0.0661867	0.185019
ENSMUSG00000040627	Aicda	1.46221	2.63708	1.28823	2.04706	0.0406524	0.127077
ENSMUSG00000105609	Gm42501	0.921907	2.63693	1.3229	1.9933	0.046229	0.140633
ENSMUSG00000054072	Iigp1	3289.48	2.63614	0.907343	2.90534	0.00366852	0.0186322
ENSMUSG00000027297	Ltk	6.86468	2.63287	0.599081	4.39485	1.10847e-05	0.000118773
ENSMUSG00000034855	Cxcl10	172.551	2.62388	1.06026	2.47475	0.0133331	0.053705
ENSMUSG00000097815	Gm26809	443.353	2.62306	0.23981	10.9381	7.58005e-28	1.36234e-25
ENSMUSG00000051279	Gdf6	18.0455	2.6198	0.401926	6.51812	7.11942e-11	2.03534e-09
ENSMUSG00000076873	Trdv5	1.40579	2.61698	1.19646	2.18727	0.0287228	0.0974254
ENSMUSG00000020892	Aloxe3	10.2825	2.61697	0.503355	5.19904	2.00318e-07	3.18982e-06
ENSMUSG00000082767	Gm11622	0.904149	2.61679	1.34511	1.94541	0.051726	0.153493
ENSMUSG00000114028	9630002D21Rik	0.924247	2.616	1.46688	1.78338	0.0745252	0.202003
ENSMUSG00000089371	Mir1938	2.06252	2.61287	1.1148	2.3438	0.0190882	0.0710772
ENSMUSG00000099860	Gm29456	0.895532	2.61231	1.31923	1.98017	0.0476839	0.144067
ENSMUSG00000087364	Gm13398	7.43489	2.6086	0.667172	3.90993	9.23223e-05	0.000790886
ENSMUSG00000112716	4930471E19Rik	0.900552	2.60716	1.34268	1.94176	0.0521664	0.154578
ENSMUSG00000029736	Nobox	0.894533	2.60656	1.34351	1.94011	0.0523663	0.155
ENSMUSG00000114755	Galr3	2.02935	2.60615	1.11834	2.33038	0.0197859	0.0730598
ENSMUSG00000111167	Gm39321	0.889918	2.60353	1.47054	1.77045	0.0766521	0.206131
ENSMUSG00000086711	Gm15482	51.7945	2.60104	0.25421	10.2318	1.42791e-24	1.90569e-22
ENSMUSG00000076431	Sox4	667.875	2.599	0.136279	19.0711	4.389e-81	1.47904e-77
ENSMUSG00000117315	AC154218.2	0.890018	2.59835	1.4851	1.74961	0.0801851	0.212851
ENSMUSG00000108854	D830036C21Rik	3.39567	2.59802	0.839912	3.09321	0.00198006	0.0110955
ENSMUSG00000085576	Dpy19l2	0.88874	2.59766	1.48517	1.74907	0.0802792	0.213037
ENSMUSG00000021250	Fos	934.165	2.59761	0.383638	6.77099	1.27906e-11	4.04246e-10
ENSMUSG00000038963	Slco4a1	425.445	2.59536	0.39757	6.52806	6.66287e-11	1.91497e-09
ENSMUSG00000041907	Gpr45	2.67372	2.59519	1.00772	2.57531	0.0100151	0.0427886
ENSMUSG00000028185	Dnase2b	2.03085	2.59502	1.36253	1.90456	0.0568373	0.164849
ENSMUSG00000082560	Gm15157	2.01214	2.59486	1.10918	2.33945	0.0193122	0.0716907
ENSMUSG00000037406	Htra4	251.818	2.59478	0.264247	9.81952	9.27837e-23	1.03362e-20
ENSMUSG00000030792	Dkkl1	2.75838	2.59462	0.981436	2.6437	0.00820057	0.036174
ENSMUSG00000062444	Ap3b2	5.96393	2.59367	0.639568	4.05534	5.00613e-05	0.000461876
ENSMUSG00000087125	A230108P19Rik	0.540802	2.59339	2.60449	0.995736	0.319378	NA
ENSMUSG00000030510	Cers3	65.337	2.59182	0.398326	6.50677	7.67824e-11	2.18122e-09
ENSMUSG00000089710	Gm15810	0.885227	2.59154	1.62871	1.59116	0.111574	0.270771
ENSMUSG00000088772	Gm26040	0.539153	2.58944	2.60542	0.993868	0.320287	NA
ENSMUSG00000115526	4930413F20Rik	2.6995	2.58816	0.979018	2.64363	0.00820226	0.036174
ENSMUSG00000047293	Gpr15	2.8187	2.58743	1.39961	1.84868	0.0645042	0.181635
ENSMUSG00000087206	Gm16175	1.96333	2.58686	1.14441	2.26043	0.0237943	0.0843201
ENSMUSG00000099749	Gm29323	15.0503	2.58437	0.456176	5.66529	1.46774e-08	2.93103e-07
ENSMUSG00000083240	Gm13453	0.538927	2.58175	2.06897	1.24784	0.212088	NA
ENSMUSG00000115845	4933402J15Rik	4.7114	2.58122	0.709834	3.63637	0.000276503	0.00202892
ENSMUSG00000029102	Hgfac	666.581	2.58001	0.393129	6.56274	5.2827e-11	1.548e-09
ENSMUSG00000027261	Hao1	0.536801	2.57707	2.06929	1.24539	0.212987	NA
ENSMUSG00000109163	3110009M11Rik	0.86798	2.57415	1.482	1.73694	0.0823973	0.217098
ENSMUSG00000023232	Serinc2	471.47	2.57355	0.33632	7.65209	1.97735e-14	9.03513e-13
ENSMUSG00000037033	Clca3b	52.3232	2.57264	0.571118	4.50457	6.65069e-06	7.55248e-05
ENSMUSG00000046733	Gprc5a	163.69	2.56873	0.293275	8.75876	1.97418e-18	1.43843e-16
ENSMUSG00000055561	Spink5	0.92112	2.56827	1.78669	1.43744	0.150593	0.33255
ENSMUSG00000115855	Gm34643	1.35849	2.56785	1.415	1.81474	0.0695643	0.191953
ENSMUSG00000089871	Speer4cos	8.70549	2.56753	0.604083	4.2503	2.13485e-05	0.000214591
ENSMUSG00000110686	Gm45855	0.53225	2.56694	2.06996	1.24009	0.214942	NA
ENSMUSG00000079330	Lemd1	3.29726	2.56691	0.874831	2.93418	0.00334432	0.0172852
ENSMUSG00000023070	Rgn	5.31796	2.5616	0.668334	3.83282	0.000126685	0.00103772
ENSMUSG00000106586	1700013M08Rik	0.864706	2.56078	1.71112	1.49655	0.134511	0.308304
ENSMUSG00000053318	Slamf8	93.4633	2.55833	1.00344	2.54956	0.010786	0.045328
ENSMUSG00000041358	Nutm1	0.864932	2.55502	2.0106	1.27078	0.203808	0.409027
ENSMUSG00000097209	AU022754	6.5303	2.55337	0.653081	3.90973	9.24002e-05	0.000791302
ENSMUSG00000047562	Mmp10	43.7825	2.55243	0.577511	4.41971	9.88338e-06	0.000107917
ENSMUSG00000053508	Gtsf2	3.37497	2.55148	0.865729	2.9472	0.00320664	0.0167049
ENSMUSG00000095210	Ighv5-9-1	0.881614	2.54959	2.00947	1.26879	0.204515	0.409684
ENSMUSG00000027962	Vcam1	399.452	2.54623	0.782184	3.25529	0.00113277	0.00690443
ENSMUSG00000043621	Ubxn10	24.5739	2.54493	0.374621	6.79335	1.09556e-11	3.49116e-10
ENSMUSG00000035042	Ccl5	71.879	2.54349	1.05368	2.41391	0.0157823	0.0614316
ENSMUSG00000112207	Gm48448	0.877371	2.54326	2.0376	1.24816	0.211971	0.419754
ENSMUSG00000002565	Scin	457.834	2.54242	0.36655	6.93608	4.03143e-12	1.3845e-10
ENSMUSG00000100558	1700025F24Rik	0.519492	2.54112	2.07309	1.22576	0.220287	NA
ENSMUSG00000000402	Egfl6	113.926	2.54088	0.242814	10.4643	1.25977e-25	1.87636e-23
ENSMUSG00000115958	Gm28040	0.518393	2.53866	2.07329	1.22446	0.22078	NA
ENSMUSG00000103370	Gm37178	0.518942	2.53742	1.7601	1.44163	0.149407	NA
ENSMUSG00000082828	Gm16106	1.34474	2.53689	1.33643	1.89827	0.0576612	0.166808
ENSMUSG00000103536	Gm37837	0.516816	2.53534	2.12041	1.19569	0.231819	NA
ENSMUSG00000030000	Add2	78.0276	2.53531	0.259069	9.78624	1.29004e-22	1.40802e-20
ENSMUSG00000099377	Gm6159	0.516553	2.53466	2.12041	1.19536	0.231946	NA
ENSMUSG00000086624	Gm16130	0.517329	2.53422	1.76011	1.43981	0.149922	NA
ENSMUSG00000102036	1700063K16Rik	0.517329	2.53422	1.76011	1.43981	0.149922	NA
ENSMUSG00000020911	Krt19	3549.05	2.53168	0.386319	6.55333	5.62674e-11	1.63991e-09
ENSMUSG00000019989	Enpp3	887.408	2.53101	0.245564	10.3069	6.55822e-25	8.97478e-23
ENSMUSG00000053153	Spag16	0.51549	2.53046	1.76009	1.43769	0.150523	NA
ENSMUSG00000068606	Gm4841	93.2841	2.52997	0.942334	2.68479	0.00725758	0.0327186
ENSMUSG00000050953	Gja1	9042.63	2.52901	0.23873	10.5936	3.19017e-26	4.94275e-24
ENSMUSG00000031438	Rnf128	1340.39	2.5279	0.320901	7.87751	3.33971e-15	1.67041e-13
ENSMUSG00000097226	Gm26600	0.513877	2.52611	1.57268	1.60624	0.108221	NA
ENSMUSG00000115366	Gm9298	0.513877	2.52611	1.57268	1.60624	0.108221	NA
ENSMUSG00000102038	Gm12345	0.512814	2.52515	1.76012	1.43465	0.151388	NA
ENSMUSG00000104130	Gm36951	0.512265	2.52405	1.76012	1.43402	0.151567	NA
ENSMUSG00000076475	Trbv19	0.511715	2.52366	2.1211	1.18979	0.234131	NA
ENSMUSG00000084192	Gm13282	0.871158	2.52182	1.72821	1.45921	0.144507	0.323587
ENSMUSG00000080845	Gm9115	0.509362	2.51821	2.07501	1.21359	0.224906	NA
ENSMUSG00000041605	Inava	84.3233	2.5171	0.356989	7.05091	1.77747e-12	6.40627e-11
ENSMUSG00000100247	A530053M12Rik	0.508813	2.51707	1.76014	1.43004	0.152706	NA
ENSMUSG00000109589	Gm45267	1.97667	2.51656	1.06667	2.35928	0.0183105	0.0688101
ENSMUSG00000100910	Gm29128	0.506424	2.5114	2.12238	1.1833	0.236691	NA
ENSMUSG00000041567	Serpina12	0.506424	2.5114	2.12238	1.1833	0.236691	NA
ENSMUSG00000022878	Adipoq	0.506424	2.5114	2.12238	1.1833	0.236691	NA
ENSMUSG00000049128	Ivl	5.1344	2.5076	0.773589	3.24151	0.00118897	0.00720786
ENSMUSG00000097579	Gm26799	19.1991	2.50094	0.383212	6.52624	6.74394e-11	1.93415e-09
ENSMUSG00000040447	Spns2	3603.18	2.49976	0.200627	12.4597	1.23765e-35	4.27766e-33
ENSMUSG00000099158	Mir6368	1.90931	2.4995	1.08786	2.29764	0.0215825	0.0781312
ENSMUSG00000090231	Cfb	70.3384	2.4989	1.00242	2.49286	0.0126717	0.051557
ENSMUSG00000040471	Ggt6	49.4335	2.49702	0.443857	5.62573	1.84726e-08	3.6061e-07
ENSMUSG00000055170	Ifng	9.49907	2.49324	0.752202	3.31458	0.000917798	0.00574615
ENSMUSG00000015484	Fam163a	2.52218	2.49301	0.955383	2.60944	0.00906914	0.0393521
ENSMUSG00000114860	Gm49291	0.849932	2.49195	1.70897	1.45816	0.144798	0.323956
ENSMUSG00000114062	Gm48313	0.496569	2.49137	2.12561	1.17208	0.241167	NA
ENSMUSG00000065449	Mir365-1	0.496569	2.49137	2.12561	1.17208	0.241167	NA
ENSMUSG00000040328	Olfr56	89.4639	2.4906	0.845752	2.94484	0.00323127	0.0168137
ENSMUSG00000102414	Gm36938	0.494956	2.48815	2.07899	1.19681	0.231382	NA
ENSMUSG00000113000	Gm6049	0.494956	2.48815	2.07899	1.19681	0.231382	NA
ENSMUSG00000086365	4930593C16Rik	0.844719	2.48773	1.66872	1.4908	0.136013	0.310743
ENSMUSG00000112331	Gm33035	0.493892	2.48572	2.07924	1.1955	0.231894	NA
ENSMUSG00000007480	Mc5r	0.847657	2.48478	1.50257	1.65369	0.0981909	0.246865
ENSMUSG00000108570	Gm7726	0.493343	2.48391	2.12648	1.16809	0.242772	NA
ENSMUSG00000052909	Gm9894	0.490441	2.4836	1.76174	1.40974	0.158616	NA
ENSMUSG00000111344	Gm48467	0.489891	2.4825	1.76177	1.40909	0.158808	NA
ENSMUSG00000097540	1700037F24Rik	0.494406	2.48248	2.63422	0.942394	0.345991	NA
ENSMUSG00000095681	Gm8281	1.29119	2.48207	1.28177	1.93644	0.0528143	0.155998
ENSMUSG00000084067	Gm14269	0.849561	2.48179	1.50107	1.65334	0.0982607	0.246987
ENSMUSG00000111468	5033425B01Rik	13.2305	2.48117	0.466924	5.31385	1.07332e-07	1.79613e-06
ENSMUSG00000104686	Gm42815	1.92438	2.48042	1.05792	2.34463	0.0190458	0.0709859
ENSMUSG00000088148	Mir1983	0.493928	2.47924	3.09661	0.800633	0.423344	NA
ENSMUSG00000108213	Gm44172	0.846994	2.47923	1.50087	1.65187	0.0985617	0.247543
ENSMUSG00000022951	Rcan1	751.59	2.47868	0.208967	11.8616	1.87368e-32	5.10227e-30
ENSMUSG00000084764	Grip1os2	12.6353	2.47855	0.5667	4.37365	1.22186e-05	0.000130044
ENSMUSG00000110663	Gm39157	0.49228	2.47707	2.63569	0.939818	0.347311	NA
ENSMUSG00000037159	Wee2	0.486439	2.47547	1.76193	1.40497	0.160029	NA
ENSMUSG00000016526	Dyrk3	50.5312	2.47349	0.256342	9.64918	4.95494e-22	5.15754e-20
ENSMUSG00000044162	Tnip3	124.647	2.47267	0.81059	3.05045	0.00228495	0.012528
ENSMUSG00000090306	Adh6-ps1	0.489927	2.47065	2.69417	0.917034	0.359125	NA
ENSMUSG00000105437	Gm42450	0.486989	2.46972	2.08087	1.18687	0.235281	NA
ENSMUSG00000064443	Gm26226	1.26115	2.46959	1.26628	1.95027	0.0511435	0.152284
ENSMUSG00000021216	Tubal3	1.25782	2.46957	1.26665	1.94968	0.0512141	0.152393
ENSMUSG00000103637	Gm38330	0.485889	2.46718	2.08115	1.18549	0.235824	NA
ENSMUSG00000095204	Ighv1-52	12.3195	2.46664	0.855449	2.88345	0.00393348	0.0196813
ENSMUSG00000090033	Gm16243	1.26423	2.46448	1.3187	1.86888	0.0616399	0.175698
ENSMUSG00000022037	Clu	4378.89	2.46223	0.263335	9.35018	8.7495e-21	8.24747e-19
ENSMUSG00000111698	Gm47105	3.11334	2.45972	0.903763	2.72165	0.00649575	0.0298634
ENSMUSG00000083138	Cyp4a29	0.482438	2.45824	2.12946	1.15439	0.248338	NA
ENSMUSG00000076143	Mir708	0.830413	2.45819	1.49794	1.64105	0.100787	NA
ENSMUSG00000105300	Gm30613	19.2176	2.45808	0.415976	5.9092	3.43781e-09	7.57807e-08
ENSMUSG00000104920	Gm43215	14.0635	2.45608	0.680024	3.61176	0.000304128	0.00220166
ENSMUSG00000098726	Mir6417	0.825284	2.45573	1.4636	1.67788	0.0933713	NA
ENSMUSG00000093861	Igkv1-110	24.1457	2.45526	0.794997	3.08838	0.00201248	0.0112421
ENSMUSG00000088576	Gm24532	3.09389	2.45448	0.832158	2.94953	0.00318256	0.0166115
ENSMUSG00000078853	Igtp	667.681	2.45391	0.861187	2.84945	0.00437946	0.0215567
ENSMUSG00000107523	Gm44451	1.86987	2.45219	1.16206	2.11022	0.0348394	0.113052
ENSMUSG00000018569	Cldn7	360.304	2.4516	0.371648	6.59655	4.2084e-11	1.25087e-09
ENSMUSG00000021803	Cdhr1	0.8288	2.45158	1.36707	1.7933	0.0729246	NA
ENSMUSG00000089272	Gm24549	0.845708	2.45153	1.49169	1.64346	0.100287	0.250638
ENSMUSG00000057967	Fgf18	8.74071	2.4479	0.731447	3.34666	0.000817925	0.00520429
ENSMUSG00000074300	BC030870	12.4452	2.44785	0.420204	5.82538	5.69819e-09	1.22035e-07
ENSMUSG00000111927	Gm47770	0.828655	2.44753	1.45982	1.6766	0.0936213	NA
ENSMUSG00000083430	Gm13006	0.480825	2.44749	2.64381	0.925742	0.35458	NA
ENSMUSG00000084393	Gm14101	1.83194	2.44591	1.2155	2.01226	0.0441928	0.135926
ENSMUSG00000086310	Gm12278	0.843869	2.44549	1.36256	1.79477	0.0726897	0.198172
ENSMUSG00000085421	4732490B19Rik	11.2351	2.4441	0.494383	4.94374	7.66369e-07	1.07607e-05
ENSMUSG00000108239	Gm19434	1.87122	2.44347	1.08643	2.24907	0.0245079	0.0862207
ENSMUSG00000028347	Tmeff1	145.068	2.44332	0.184527	13.241	5.08758e-40	2.36476e-37
ENSMUSG00000028364	Tnc	12524.4	2.44282	0.16983	14.3839	6.52659e-47	4.29147e-44
ENSMUSG00000068348	Gm10238	5.54648	2.43946	0.773314	3.15455	0.00160744	0.00928741
ENSMUSG00000043827	Olfr94	0.477373	2.43788	2.70346	0.901763	0.367183	NA
ENSMUSG00000091255	Speer4e	2.46471	2.43392	1.04345	2.33256	0.0196711	0.0727352
ENSMUSG00000007107	Atp1a4	0.806362	2.43368	1.49597	1.62682	0.103774	NA
ENSMUSG00000104659	Gm43619	0.806362	2.43368	1.49597	1.62682	0.103774	NA
ENSMUSG00000083626	Gm4459	0.8097	2.43368	1.49506	1.62782	0.103563	NA
ENSMUSG00000102144	4930429P21Rik	0.830012	2.43292	1.48934	1.63355	0.102353	NA
ENSMUSG00000112243	Gm47342	17.4416	2.43068	0.489289	4.96778	6.77253e-07	9.65014e-06
ENSMUSG00000104701	Gm42555	0.807024	2.43009	1.49456	1.62595	0.103959	NA
ENSMUSG00000114022	Gm17330	0.803424	2.42969	1.54642	1.57117	0.116142	NA
ENSMUSG00000114519	Gm32376	1.83838	2.42929	1.09325	2.22208	0.026278	0.0909759
ENSMUSG00000087459	Csmd2os	0.811895	2.42825	1.39043	1.7464	0.0807416	NA
ENSMUSG00000111540	4930584E12Rik	0.806426	2.42825	1.39152	1.74504	0.0809786	NA
ENSMUSG00000028750	Pla2g2c	0.801811	2.42748	1.49511	1.62362	0.104458	NA
ENSMUSG00000022780	Meltf	5.67036	2.42664	0.781605	3.10469	0.00190479	0.0107429
ENSMUSG00000094843	Ppp1r2-ps1	0.804086	2.42641	1.36433	1.77847	0.0753272	NA
ENSMUSG00000094649	Gm7102	8.07839	2.42406	0.548251	4.42144	9.80442e-06	0.000107185
ENSMUSG00000102123	Gm4319	1.26496	2.42379	1.48964	1.6271	0.103715	0.256779
ENSMUSG00000068547	Clca4a	0.803237	2.42375	1.54459	1.56918	0.116605	NA
ENSMUSG00000113563	Gm2492	0.801183	2.42231	1.45802	1.66137	0.0966393	NA
ENSMUSG00000028348	Cavin4	8.02423	2.42156	0.556212	4.35366	1.33883e-05	0.000141155
ENSMUSG00000034813	Grip1	109.948	2.42099	0.477707	5.06795	4.0213e-07	6.04294e-06
ENSMUSG00000020798	Spns3	68.3715	2.42087	0.279968	8.64696	5.28892e-18	3.64665e-16
ENSMUSG00000019828	Grm1	0.799235	2.41851	1.49276	1.62016	0.105197	NA
ENSMUSG00000065715	Snord7	0.797958	2.41813	1.45741	1.6592	0.0970747	NA
ENSMUSG00000113184	AC125351.1	21.6025	2.41774	0.437045	5.53202	3.16566e-08	5.92248e-07
ENSMUSG00000045394	Epcam	1833.52	2.41664	0.31234	7.73721	1.0162e-14	4.86603e-13
ENSMUSG00000005891	Prl4a1	0.801766	2.41603	1.38895	1.73946	0.0819534	NA
ENSMUSG00000026090	2010300C02Rik	243.304	2.41514	0.340978	7.08297	1.41099e-12	5.14733e-11
ENSMUSG00000071104	Ccdc110	1.85038	2.41361	1.14639	2.10541	0.0352558	0.114005
ENSMUSG00000112947	Gm47493	18.2481	2.413	0.437339	5.51746	3.43942e-08	6.39875e-07
ENSMUSG00000039304	Tnfsf10	1081.28	2.41132	0.332963	7.24201	4.42073e-13	1.7148e-11
ENSMUSG00000026994	Galnt3	319.725	2.41125	0.312622	7.71298	1.22912e-14	5.8235e-13
ENSMUSG00000000303	Cdh1	2288.91	2.4098	0.336534	7.16066	8.02892e-13	3.01885e-11
ENSMUSG00000114382	Gm4814	0.792295	2.40819	1.54278	1.56095	0.118536	NA
ENSMUSG00000089767	4930556I23Rik	5.50263	2.40699	0.670176	3.59157	0.000328686	0.00235608
ENSMUSG00000086917	Gm11630	1.24077	2.40578	1.62659	1.47903	0.139131	0.315383
ENSMUSG00000085967	Gm12530	3.60599	2.40496	0.775438	3.10142	0.00192598	0.0108466
ENSMUSG00000114980	4933432I03Rik	0.810816	2.40358	1.7097	1.40585	0.159768	NA
ENSMUSG00000070866	Zfp804a	8.9681	2.40354	0.590511	4.07027	4.69593e-05	0.000436544
ENSMUSG00000028186	Uox	13.9897	2.40293	0.865693	2.77573	0.0055078	0.0259816
ENSMUSG00000038400	Pmepa1	1394.56	2.40273	0.14962	16.0589	4.95144e-58	6.35646e-55
ENSMUSG00000068748	Ptprz1	1248.94	2.40224	0.322925	7.43898	1.01465e-13	4.23435e-12
ENSMUSG00000112161	Gm34045	0.780649	2.39831	1.45508	1.64823	0.0993056	NA
ENSMUSG00000094026	Gm23002	0.781198	2.39779	1.49072	1.60848	0.10773	NA
ENSMUSG00000105504	Gbp5	528.959	2.39595	0.861826	2.78008	0.00543454	0.025708
ENSMUSG00000025610	Map3k7cl	90.9867	2.39311	0.225936	10.592	3.2461e-26	5.00066e-24
ENSMUSG00000110923	Gm47499	0.796995	2.39119	1.48398	1.61133	0.107107	NA
ENSMUSG00000084826	AI847159	0.772796	2.39092	1.4908	1.60378	0.108762	NA
ENSMUSG00000092200	Tnxa	0.778329	2.38562	1.48738	1.6039	0.108735	NA
ENSMUSG00000050776	Olfr1317	0.798134	2.38506	2.13937	1.11484	0.264919	NA
ENSMUSG00000075581	Gm16409	0.77778	2.38489	1.48729	1.60351	0.108822	NA
ENSMUSG00000049848	Ceacam19	3.4487	2.38434	1.06633	2.23602	0.0253504	0.0884773
ENSMUSG00000021795	Sftpd	1261.9	2.38425	0.281336	8.47475	2.35594e-17	1.49093e-15
ENSMUSG00000115611	Gm4606	1.81975	2.38322	1.08747	2.19152	0.0284139	0.0966088
ENSMUSG00000023829	Slc22a1	8.41005	2.38159	0.557259	4.27375	1.9221e-05	0.000194951
ENSMUSG00000017002	Slpi	135.948	2.37894	0.663358	3.58621	0.000335523	0.00240012
ENSMUSG00000048385	Scrt1	0.764793	2.37765	1.54113	1.54279	0.122881	NA
ENSMUSG00000047281	Sfn	165.872	2.36794	0.259981	9.10812	8.38208e-20	7.17373e-18
ENSMUSG00000023151	Lrrc69	2.34905	2.36741	0.96761	2.44665	0.0144189	0.0571144
ENSMUSG00000111922	Gm47760	0.466517	2.36489	2.73287	0.86535	0.386847	NA
ENSMUSG00000084645	Gm24380	3.55061	2.3643	0.893407	2.64639	0.00813553	0.0359492
ENSMUSG00000049115	Agtr1a	460.761	2.36414	0.234534	10.0802	6.76224e-24	8.36253e-22
ENSMUSG00000073386	9830107B12Rik	0.760791	2.36301	1.78178	1.32621	0.184771	NA
ENSMUSG00000102925	Gm37150	0.763794	2.36134	1.78003	1.32657	0.184649	NA
ENSMUSG00000111548	Gm8162	10.5786	2.36078	0.616198	3.83121	0.000127516	0.001043
ENSMUSG00000076898	Traj31	0.76263	2.36057	2.03845	1.15802	0.246855	NA
ENSMUSG00000112234	Gm48427	2.31388	2.35877	1.0177	2.31774	0.0204635	0.0749252
ENSMUSG00000109422	Gm45174	1.19414	2.35768	1.33262	1.76921	0.0768593	0.206585
ENSMUSG00000040525	Cblc	145.783	2.35629	0.364258	6.46874	9.8822e-11	2.75221e-09
ENSMUSG00000051682	Treml4	25.8709	2.35454	0.997075	2.36144	0.018204	0.0685038
ENSMUSG00000076494	Trbj2-3	0.763244	2.35404	2.06089	1.14224	0.253352	NA
ENSMUSG00000001870	Ltbp1	4487.17	2.35403	0.118943	19.7914	3.53366e-87	1.36091e-83
ENSMUSG00000000202	Btbd17	7.0585	2.35292	0.562396	4.18375	2.86744e-05	0.000279679
ENSMUSG00000113437	Gm47412	1.1869	2.35263	1.23891	1.89895	0.0575711	0.166602
ENSMUSG00000035681	Kcnc2	266.048	2.35183	0.395468	5.94695	2.73179e-09	6.1219e-08
ENSMUSG00000022487	Gtsf1	10.6956	2.35115	0.468115	5.02258	5.09811e-07	7.47362e-06
ENSMUSG00000104876	Trdc	53.466	2.35086	0.234351	10.0314	1.10953e-23	1.35347e-21
ENSMUSG00000044393	Dsg2	713.253	2.34844	0.400178	5.86848	4.39814e-09	9.58523e-08
ENSMUSG00000104653	Gm43109	0.755726	2.34662	2.1307	1.10134	0.27075	NA
ENSMUSG00000111811	Gm39327	3.42927	2.34586	0.949785	2.46988	0.0135157	0.0543106
ENSMUSG00000046005	D830044D21Rik	3.02219	2.3449	1.07762	2.176	0.0295549	0.0994224
ENSMUSG00000116438	Gm18911	1.17518	2.34305	1.48429	1.57856	0.114436	0.275631
ENSMUSG00000104401	Gm20750	1.79159	2.34215	1.41668	1.65327	0.0982764	0.246987
ENSMUSG00000086608	4930562D21Rik	60.3661	2.34137	0.281278	8.32403	8.50255e-17	5.09378e-15
ENSMUSG00000103305	Gm34068	0.777486	2.3404	2.07716	1.12673	0.259856	NA
ENSMUSG00000082292	Gm12250	234.016	2.34008	0.888207	2.63461	0.00842344	0.036997
ENSMUSG00000085810	Gm16325	4.0478	2.33933	0.799357	2.92651	0.00342785	0.0176324
ENSMUSG00000103788	Gm37527	7.09299	2.33812	0.62835	3.72104	0.000198403	0.00152822
ENSMUSG00000029378	Areg	1.16813	2.33597	1.37828	1.69484	0.090106	0.232188
ENSMUSG00000040680	Kremen2	2.89653	2.33366	0.921606	2.53216	0.0113361	0.0471329
ENSMUSG00000090131	Gm16162	11.6371	2.33324	0.458968	5.08367	3.70214e-07	5.60707e-06
ENSMUSG00000081265	Gm11282	2.89655	2.33269	0.845858	2.75777	0.00581963	0.0272192
ENSMUSG00000091381	Vmn2r83	0.779648	2.33231	1.79576	1.29879	0.194015	NA
ENSMUSG00000110438	Gm45756	4.75972	2.33015	0.756441	3.08041	0.00206716	0.0115094
ENSMUSG00000019359	Gdpd2	16.2375	2.32964	0.441667	5.27465	1.3301e-07	2.19049e-06
ENSMUSG00000041886	Macc1	256.017	2.32855	0.331921	7.01538	2.29329e-12	8.13083e-11
ENSMUSG00000116921	AC183097.3	1.18092	2.32824	1.3236	1.75902	0.0785746	0.209819
ENSMUSG00000109973	Gm45397	134.681	2.32491	0.278229	8.3561	6.48257e-17	3.96289e-15
ENSMUSG00000047383	C2cd6b	0.796508	2.32487	1.78701	1.30098	0.193264	NA
ENSMUSG00000061718	Ppp1r1b	2.9367	2.3248	0.870601	2.67034	0.00757734	0.0338825
ENSMUSG00000081722	Gm11763	2.28493	2.3247	0.946547	2.45598	0.0140502	0.0558836
ENSMUSG00000024534	Sncaip	409.02	2.32463	0.226583	10.2595	1.07228e-24	1.44538e-22
ENSMUSG00000100843	Gm8307	10.5595	2.32146	0.509778	4.55387	5.26685e-06	6.10968e-05
ENSMUSG00000028148	Them5	1.71506	2.31849	1.14484	2.02516	0.0428509	0.132707
ENSMUSG00000042808	Gpx2	47.6006	2.31821	0.503328	4.60578	4.10929e-06	4.89105e-05
ENSMUSG00000112117	Rmst	41.1011	2.31521	0.42237	5.48146	4.21827e-08	7.72557e-07
ENSMUSG00000060180	Myh13	2.27306	2.31404	0.971793	2.38121	0.017256	0.0658114
ENSMUSG00000105086	Gm42534	2.92133	2.31369	0.968548	2.38882	0.0169025	0.0648741
ENSMUSG00000091297	Gm8439	14.4168	2.31204	0.514745	4.49163	7.06815e-06	7.97281e-05
ENSMUSG00000029754	Dlx6	57.0631	2.31133	0.37925	6.09447	1.09801e-09	2.60574e-08
ENSMUSG00000095416	Ighv1-12	6.5465	2.31126	1.23908	1.86531	0.0621374	0.176724
ENSMUSG00000096719	Mrgpra2b	1.15441	2.3091	1.69174	1.36492	0.172277	0.36444
ENSMUSG00000112294	Gm4129	1.69207	2.30566	1.30575	1.76577	0.077434	0.207757
ENSMUSG00000112758	Gm36172	1.16397	2.30437	1.53556	1.50067	0.13344	0.306815
ENSMUSG00000059089	Fcgr4	248.955	2.30387	0.91207	2.52598	0.0115376	0.0477656
ENSMUSG00000105462	Igkv4-77	0.444143	2.30264	2.71011	0.849649	0.39552	NA
ENSMUSG00000068180	AY512915	0.444143	2.30264	2.71011	0.849649	0.39552	NA
ENSMUSG00000041831	Sytl3	49.586	2.29696	0.294297	7.80491	5.95426e-15	2.91856e-13
ENSMUSG00000100769	Gm28893	0.442016	2.29651	2.71191	0.846824	0.397093	NA
ENSMUSG00000101257	2310015K22Rik	0.442016	2.29651	2.71191	0.846824	0.397093	NA
ENSMUSG00000103958	Gm8023	0.442016	2.29651	2.71191	0.846824	0.397093	NA
ENSMUSG00000113801	Gm18618	0.442016	2.29651	2.71191	0.846824	0.397093	NA
ENSMUSG00000114745	Gm48802	6.91752	2.29409	0.571676	4.01293	5.99699e-05	0.000540351
ENSMUSG00000065510	Mir361	0.752873	2.29137	1.73879	1.31779	0.187573	NA
ENSMUSG00000106741	4930513D17Rik	0.756939	2.29129	1.73709	1.31904	0.187155	NA
ENSMUSG00000030732	Chrdl2	189.346	2.29007	0.313338	7.30862	2.69909e-13	1.0685e-11
ENSMUSG00000110141	Gm45684	4.99692	2.28988	0.878869	2.60548	0.00917451	0.0397393
ENSMUSG00000106519	Gm38509	0.44308	2.28911	2.17967	1.05021	0.293623	NA
ENSMUSG00000094754	Gm25020	0.44308	2.28911	2.17967	1.05021	0.293623	NA
ENSMUSG00000021679	S100z	0.44308	2.28911	2.17967	1.05021	0.293623	NA
ENSMUSG00000115494	Gm49293	0.44308	2.28911	2.17967	1.05021	0.293623	NA
ENSMUSG00000036800	Fam135b	34.5668	2.28771	0.523468	4.37028	1.24085e-05	0.000131639
ENSMUSG00000112069	Gm9476	0.44253	2.28764	2.17986	1.04944	0.293974	NA
ENSMUSG00000098040	Gm20757	1.70028	2.28621	1.18195	1.93428	0.0530788	0.156594
ENSMUSG00000106456	Gm9678	0.441467	2.28482	2.18024	1.04797	0.294654	NA
ENSMUSG00000054351	4930553M12Rik	0.441467	2.28482	2.18024	1.04797	0.294654	NA
ENSMUSG00000113921	Gm48054	0.751147	2.28255	1.73659	1.31439	0.188715	NA
ENSMUSG00000013338	Fer1l4	261.903	2.28017	0.350077	6.51335	7.34928e-11	2.09439e-09
ENSMUSG00000041737	Tmem45b	392.478	2.27895	0.366818	6.21276	5.20612e-10	1.30071e-08
ENSMUSG00000023995	Tspo2	11.0511	2.27848	0.50798	4.48537	7.27866e-06	8.17265e-05
ENSMUSG00000107508	Gm44083	0.439078	2.27834	2.18106	1.0446	0.296206	NA
ENSMUSG00000091956	C2cd4b	0.439078	2.27834	2.18106	1.0446	0.296206	NA
ENSMUSG00000081674	Gm6184	0.439078	2.27834	2.18106	1.0446	0.296206	NA
ENSMUSG00000020205	Phlda1	31.8314	2.27702	0.417901	5.44871	5.07359e-08	9.11252e-07
ENSMUSG00000104395	Gm37957	0.438015	2.27551	2.18144	1.04312	0.296893	NA
ENSMUSG00000058063	Trim31	0.438015	2.27551	2.18144	1.04312	0.296893	NA
ENSMUSG00000103816	Gm38006	0.437465	2.27404	2.18164	1.04235	0.297249	NA
ENSMUSG00000117164	AC117244.1	0.772522	2.27372	1.55132	1.46567	0.142739	NA
ENSMUSG00000086706	Gm15848	2.85952	2.26974	0.842386	2.69441	0.00705126	0.0319541
ENSMUSG00000095889	Ighv1-58	1.63616	2.26677	1.39535	1.62451	0.104266	0.257787
ENSMUSG00000050063	Klk6	0.756826	2.26568	2.06581	1.09675	0.27275	NA
ENSMUSG00000065683	Gm23731	8.01064	2.26379	0.719814	3.14496	0.00166108	0.00954009
ENSMUSG00000005355	Casp14	13.9095	2.26149	0.497489	4.54581	5.47244e-06	6.32911e-05
ENSMUSG00000030187	Klra2	143.122	2.26135	0.945829	2.39086	0.0168089	0.0645883
ENSMUSG00000060512	0610040J01Rik	184.529	2.26088	0.150437	15.0288	4.75613e-51	3.88547e-48
ENSMUSG00000025921	Rdh10	1320.19	2.25862	0.199735	11.3081	1.19622e-29	2.42473e-27
ENSMUSG00000068011	Mkrn2os	45.7296	2.25496	0.271422	8.30797	9.73555e-17	5.78107e-15
ENSMUSG00000112121	C230072F16Rik	6.22378	2.25465	0.835794	2.69762	0.0069837	0.0317161
ENSMUSG00000026358	Rgs1	796.603	2.25436	0.362612	6.217	5.06736e-10	1.26726e-08
ENSMUSG00000060183	Cxcl11	8.67964	2.25291	1.05276	2.14	0.0323546	0.106671
ENSMUSG00000044903	Psg22	1.69798	2.25225	1.27914	1.76075	0.0782806	0.209411
ENSMUSG00000033737	Fndc3c1	3.35572	2.25219	0.960358	2.34515	0.0190192	0.0709279
ENSMUSG00000045339	A930104D05Rik	0.737323	2.25043	1.73157	1.29965	0.193722	NA
ENSMUSG00000058952	Cfi	169.386	2.24864	0.288212	7.80204	6.09163e-15	2.9697e-13
ENSMUSG00000022441	Efcab6	1.15884	2.2465	1.34264	1.67319	0.0942896	0.239423
ENSMUSG00000051439	Cd14	343.617	2.24596	0.35211	6.37858	1.78734e-10	4.833e-09
ENSMUSG00000026579	F5	472.429	2.24367	0.366054	6.12934	8.82439e-10	2.13936e-08
ENSMUSG00000104057	Gm38130	3.32066	2.2433	0.797262	2.81375	0.00489676	0.0236199
ENSMUSG00000116341	Cyp2d36-ps	0.729836	2.24165	1.51913	1.47562	0.140047	NA
ENSMUSG00000032860	P2ry2	55.5384	2.24155	0.250942	8.93253	4.16371e-19	3.26307e-17
ENSMUSG00000025202	Scd3	6.04567	2.24113	0.59752	3.75071	0.000176331	0.00137829
ENSMUSG00000095649	Gm8979	31.2139	2.24052	0.487647	4.59455	4.33686e-06	5.13246e-05
ENSMUSG00000054889	Dsp	1925.98	2.24039	0.325749	6.87765	6.08499e-12	2.01282e-10
ENSMUSG00000085498	Gm14023	25.6996	2.24031	0.476751	4.69913	2.61273e-06	3.28529e-05
ENSMUSG00000086229	Gm4887	0.729501	2.24005	1.51872	1.47496	0.140224	NA
ENSMUSG00000114396	Gm31227	0.421769	2.23937	2.77228	0.807771	0.419223	NA
ENSMUSG00000041481	Serpina3g	292.437	2.23827	1.16119	1.92756	0.05391	0.158508
ENSMUSG00000068877	Selenbp2	7.6695	2.2375	0.573946	3.89845	9.68094e-05	0.000823567
ENSMUSG00000108783	Gm36546	0.729905	2.23664	1.68782	1.32516	0.185117	NA
ENSMUSG00000043623	4933412A08Rik	0.747472	2.23659	1.51221	1.47902	0.139134	NA
ENSMUSG00000097313	Gm26569	11.1818	2.23644	0.583525	3.83264	0.000126777	0.00103789
ENSMUSG00000045065	9930022D16Rik	2.18167	2.23571	1.0707	2.08808	0.0367905	0.117907
ENSMUSG00000035498	Cdcp1	465.626	2.23477	0.364559	6.13008	8.78365e-10	2.13195e-08
ENSMUSG00000102660	Gm38378	0.420706	2.23203	2.18896	1.01968	0.307882	NA
ENSMUSG00000036834	Plch1	533.918	2.23135	0.283377	7.87414	3.43096e-15	1.70971e-13
ENSMUSG00000082118	Gm13862	3.41328	2.23077	0.879575	2.53619	0.0112065	0.0466803
ENSMUSG00000038530	Rgs4	651.68	2.23077	0.263459	8.46725	2.51248e-17	1.57888e-15
ENSMUSG00000104574	Gm42836	0.420157	2.23053	2.18919	1.01888	0.308258	NA
ENSMUSG00000112965	Gm34278	0.419643	2.22914	2.18941	1.01815	0.308607	NA
ENSMUSG00000092499	1700092C10Rik	0.419643	2.22914	2.18941	1.01815	0.308607	NA
ENSMUSG00000117270	AC144797.1	0.419643	2.22914	2.18941	1.01815	0.308607	NA
ENSMUSG00000044306	4930500M09Rik	0.712367	2.22672	2.08016	1.07046	0.284414	NA
ENSMUSG00000073568	Arl14epl	0.418544	2.22614	2.18987	1.01656	0.309361	NA
ENSMUSG00000106373	Gm6522	0.41803	2.22475	2.19009	1.01583	0.309713	NA
ENSMUSG00000106679	Gm42524	0.41803	2.22475	2.19009	1.01583	0.309713	NA
ENSMUSG00000054459	Vsnl1	0.41803	2.22475	2.19009	1.01583	0.309713	NA
ENSMUSG00000115684	Gm6087	0.41803	2.22475	2.19009	1.01583	0.309713	NA
ENSMUSG00000102439	Flg	0.419093	2.22351	1.849	1.20255	0.229152	NA
ENSMUSG00000080832	M6pr-ps	0.419093	2.22351	1.849	1.20255	0.229152	NA
ENSMUSG00000099553	Gm29538	1.10709	2.22332	1.2896	1.72404	0.0847002	0.221649
ENSMUSG00000070175	Gm24162	0.41748	2.22324	2.19032	1.01503	0.310091	NA
ENSMUSG00000084198	Gm13711	0.41748	2.22324	2.19032	1.01503	0.310091	NA
ENSMUSG00000091457	Gm17171	18.0113	2.2232	0.620311	3.58401	0.000338355	0.00241827
ENSMUSG00000028602	Tnfrsf8	44.3784	2.22168	0.354568	6.26588	3.70734e-10	9.45566e-09
ENSMUSG00000079890	Gm12106	0.416705	2.22101	2.19062	1.01387	0.310644	NA
ENSMUSG00000024313	Mep1b	0.416705	2.22101	2.19062	1.01387	0.310644	NA
ENSMUSG00000043924	Ncmap	17.5537	2.2197	0.349199	6.35656	2.06323e-10	5.50175e-09
ENSMUSG00000101026	D730001G18Rik	4.34475	2.21909	0.766889	2.89363	0.00380822	0.0191755
ENSMUSG00000105839	Gm44456	0.708126	2.21889	1.73373	1.27983	0.200604	NA
ENSMUSG00000087203	Gm13986	25.2428	2.21827	0.316721	7.00387	2.48989e-12	8.76306e-11
ENSMUSG00000087486	Gm11723	1.11456	2.21813	1.33874	1.65688	0.0975434	0.245649
ENSMUSG00000096094	A630095N17Rik	1.59435	2.21657	1.38311	1.60259	0.109025	0.266666
ENSMUSG00000021680	Crhbp	0.414578	2.2152	2.19154	1.01079	0.312115	NA
ENSMUSG00000053773	Rdh8	0.415641	2.21511	1.84958	1.19763	0.231062	NA
ENSMUSG00000013974	Mcemp1	19.2482	2.21475	1.18796	1.86433	0.0622748	0.177021
ENSMUSG00000053693	Mast1	19.1137	2.21469	0.524725	4.22066	2.43587e-05	0.000241518
ENSMUSG00000080904	Gm11966	0.415092	2.21378	1.84968	1.19685	0.231366	NA
ENSMUSG00000113322	Gm48492	0.415092	2.21378	1.84968	1.19685	0.231366	NA
ENSMUSG00000114722	Gm31392	0.415092	2.21378	1.84968	1.19685	0.231366	NA
ENSMUSG00000115656	4930556J02Rik	0.70545	2.21329	1.55328	1.42491	0.154183	NA
ENSMUSG00000064941	Gm23238	0.7049	2.21222	1.51747	1.45783	0.144886	NA
ENSMUSG00000083172	Gm13409	0.414028	2.21124	1.84987	1.19535	0.231952	NA
ENSMUSG00000083178	Gm12187	0.414028	2.21124	1.84987	1.19535	0.231952	NA
ENSMUSG00000065853	Gm22354	0.414028	2.21124	1.84987	1.19535	0.231952	NA
ENSMUSG00000112298	Gm48088	0.713659	2.21113	1.54996	1.42657	0.153705	NA
ENSMUSG00000096594	Igkv8-19	7.13307	2.21014	1.68854	1.3089	0.190567	0.391011
ENSMUSG00000037977	6430571L13Rik	11.085	2.20997	0.521675	4.23629	2.27239e-05	0.000227568
ENSMUSG00000029680	Hyal4	0.702738	2.20964	1.79076	1.23391	0.217237	NA
ENSMUSG00000115283	Gm49252	1.09718	2.20955	1.28881	1.7144	0.0864544	0.224926
ENSMUSG00000041773	Enc1	280.897	2.2092	0.213295	10.3575	3.87054e-25	5.43469e-23
ENSMUSG00000063133	Klk1b1	2.73874	2.20889	0.971497	2.2737	0.0229841	0.0820701
ENSMUSG00000086645	Gm15743	1.60786	2.20858	1.1015	2.00507	0.0449554	0.137597
ENSMUSG00000085666	Gm9855	1.11643	2.20851	1.25473	1.76014	0.0783832	0.209545
ENSMUSG00000113707	Gm10457	0.70585	2.20817	1.41147	1.56444	0.117714	NA
ENSMUSG00000096415	Gm24722	0.726198	2.20785	1.54497	1.42906	0.152988	NA
ENSMUSG00000063415	Cyp26b1	97.9101	2.20755	0.403573	5.47	4.5003e-08	8.18647e-07
ENSMUSG00000074655	Gm1527	0.41164	2.20701	2.1928	1.00648	0.314185	NA
ENSMUSG00000085620	G630018N14Rik	0.41164	2.20701	2.1928	1.00648	0.314185	NA
ENSMUSG00000094320	Chchd2-ps	0.704786	2.20678	1.41136	1.56358	0.117916	NA
ENSMUSG00000065138	Gm24458	0.71047	2.20635	1.78626	1.23518	0.216764	NA
ENSMUSG00000073402	Gm8909	0.703687	2.20532	1.55144	1.42147	0.155181	NA
ENSMUSG00000113877	Gm47208	1.09448	2.20517	1.28784	1.7123	0.0868405	0.225673
ENSMUSG00000000791	Il12rb1	28.1177	2.20463	0.963815	2.2874	0.0221723	0.0798696
ENSMUSG00000020419	Hormad2	0.703174	2.20456	1.5156	1.45459	0.145784	NA
ENSMUSG00000033872	Best4-ps	0.410577	2.20409	2.19328	1.00493	0.314931	NA
ENSMUSG00000098474	Mir6919	0.410577	2.20409	2.19328	1.00493	0.314931	NA
ENSMUSG00000093159	Gm25037	1.08665	2.20297	1.28806	1.71029	0.0872118	0.22642
ENSMUSG00000083195	Gm13567	0.410027	2.20257	2.19353	1.00413	0.315318	NA
ENSMUSG00000092029	Gm9027	0.410027	2.20257	2.19353	1.00413	0.315318	NA
ENSMUSG00000112491	Gm19801	1.08255	2.20246	1.31091	1.68011	0.0929367	0.237104
ENSMUSG00000107743	Gm44087	1.08864	2.20067	1.25526	1.75317	0.0795736	0.211644
ENSMUSG00000048709	Gm8666	0.700963	2.20008	1.51489	1.45231	0.146416	NA
ENSMUSG00000070388	Fbxo39	1.08812	2.19963	1.27531	1.72478	0.0845668	0.221365
ENSMUSG00000032532	Cck	2.11632	2.19902	1.08823	2.02072	0.0433084	0.133729
ENSMUSG00000087122	4930403D09Rik	2.71132	2.1987	0.899172	2.44525	0.0144751	0.0572766
ENSMUSG00000109002	Gm38405	0.695834	2.1985	1.51605	1.45015	0.147018	NA
ENSMUSG00000091897	Gm17019	24.8659	2.19817	0.47952	4.58411	4.55932e-06	5.35109e-05
ENSMUSG00000100354	Gm29113	5.37971	2.19734	0.621251	3.53696	0.00040476	0.00282107
ENSMUSG00000116826	AC154275.1	1.07865	2.19561	1.28679	1.70627	0.0879575	0.227895
ENSMUSG00000087247	Alkal1	1.07697	2.19438	1.43093	1.53354	0.125143	0.293572
ENSMUSG00000047894	Ang2	0.692382	2.19285	1.5514	1.41346	0.157519	NA
ENSMUSG00000051920	Rspo2	1.08181	2.19136	1.48086	1.47979	0.138929	0.315057
ENSMUSG00000058248	Kcnh1	21.7756	2.18905	0.369169	5.92968	3.03534e-09	6.77399e-08
ENSMUSG00000044724	Gpr152	2.15305	2.18747	1.06044	2.0628	0.0391319	0.12343
ENSMUSG00000046031	Calhm6	35.2889	2.18729	0.966288	2.2636	0.0235985	0.0837424
ENSMUSG00000046352	Gjb2	316.319	2.18549	0.322704	6.77244	1.26627e-11	4.00672e-10
ENSMUSG00000078161	Erich3	88.3726	2.18516	0.461053	4.7395	2.14247e-06	2.74781e-05
ENSMUSG00000078952	Lncenc1	1.08493	2.18419	1.30413	1.67482	0.0939688	0.238878
ENSMUSG00000048482	Bdnf	147.211	2.18397	0.313047	6.9765	3.02633e-12	1.05409e-10
ENSMUSG00000091455	Otogl	256.413	2.18249	0.36184	6.03164	1.623e-09	3.75254e-08
ENSMUSG00000085836	Gm13074	2.0786	2.18229	1.00206	2.17781	0.02942	0.0991416
ENSMUSG00000030413	Pglyrp1	152.911	2.17888	0.451561	4.82522	1.39846e-06	1.87009e-05
ENSMUSG00000107092	Gm7993	1.06704	2.1788	1.34612	1.61858	0.105539	0.260312
ENSMUSG00000026831	1700007K13Rik	2.67436	2.17812	0.87631	2.48556	0.0129348	0.0524612
ENSMUSG00000099647	Gm5776	0.686592	2.17763	1.68594	1.29165	0.196479	NA
ENSMUSG00000106445	Gm21190	5.42324	2.1773	0.65004	3.34948	0.00080963	0.00516283
ENSMUSG00000026204	Ptprn	14.4094	2.17485	0.429942	5.05848	4.22606e-07	6.32946e-06
ENSMUSG00000113740	Gm8598	1.07657	2.17453	1.44014	1.50995	0.131057	0.302835
ENSMUSG00000032057	4833427G06Rik	0.68369	2.17167	1.72902	1.25601	0.209112	NA
ENSMUSG00000040364	Sec1	5.77101	2.17081	0.619504	3.50411	0.00045814	0.00314595
ENSMUSG00000053081	1700069B07Rik	0.398332	2.16989	2.79651	0.775927	0.437792	NA
ENSMUSG00000103865	Gm37416	0.39672	2.16913	2.20077	0.98562	0.32432	NA
ENSMUSG00000100192	Gm29587	0.39672	2.16913	2.20077	0.98562	0.32432	NA
ENSMUSG00000079034	Gm8300	0.39672	2.16913	2.20077	0.98562	0.32432	NA
ENSMUSG00000070524	Fcrlb	3.06769	2.16693	1.07857	2.00908	0.0445286	0.136643
ENSMUSG00000099061	Gm28050	0.397269	2.16678	2.75562	0.786312	0.431685	NA
ENSMUSG00000111197	Gm10608	0.395656	2.16616	2.20131	0.984031	0.3251	NA
ENSMUSG00000013766	Ly6g6e	8.81924	2.16598	0.513157	4.22089	2.43344e-05	0.00024137
ENSMUSG00000112140	Gm5780	0.685158	2.16578	1.68229	1.2874	0.197954	NA
ENSMUSG00000096953	Gm26571	0.685671	2.16555	1.72598	1.25468	0.209596	NA
ENSMUSG00000085008	Dbhos	0.395107	2.16462	2.20159	0.983207	0.325506	NA
ENSMUSG00000042724	Map3k9	140.985	2.16397	0.297719	7.26849	3.63525e-13	1.42033e-11
ENSMUSG00000085333	1700030A11Rik	1.07725	2.16356	1.47136	1.47045	0.14144	0.318847
ENSMUSG00000097229	Platr23	1.05616	2.162	1.50079	1.44058	0.149703	0.331106
ENSMUSG00000105602	Gm10636	0.391655	2.16128	1.8558	1.16461	0.244176	NA
ENSMUSG00000076604	Igkj1	0.391655	2.16128	1.8558	1.16461	0.244176	NA
ENSMUSG00000039097	Rln1	0.391655	2.16128	1.8558	1.16461	0.244176	NA
ENSMUSG00000047139	Cd24a	13929.4	2.16119	0.342482	6.31038	2.78359e-10	7.24352e-09
ENSMUSG00000087456	Gm16322	0.676285	2.15991	1.72858	1.24953	0.211472	NA
ENSMUSG00000028784	Spocd1	0.393268	2.15935	2.2025	0.980408	0.326885	NA
ENSMUSG00000083560	Gm14939	0.393268	2.15935	2.2025	0.980408	0.326885	NA
ENSMUSG00000112402	Gm10744	2.17647	2.15911	1.02214	2.11234	0.0346571	0.112609
ENSMUSG00000102495	Gm26524	0.395143	2.15843	3.11388	0.693163	0.488207	NA
ENSMUSG00000112074	Gm48278	0.392718	2.15781	2.20279	0.979581	0.327293	NA
ENSMUSG00000107384	Gm42557	1.05969	2.15759	1.53279	1.40762	0.159244	0.34549
ENSMUSG00000101206	Gm5266	0.671621	2.15746	1.73002	1.24707	0.212373	NA
ENSMUSG00000010136	Pifo	2.62627	2.15738	0.880773	2.44942	0.0143086	0.0567729
ENSMUSG00000085101	Platr16	0.394331	2.15728	2.80083	0.770231	0.441163	NA
ENSMUSG00000088220	Gm22601	0.67441	2.15654	1.72834	1.24775	0.212123	NA
ENSMUSG00000078967	Gm3272	0.392204	2.15637	2.20305	0.97881	0.327674	NA
ENSMUSG00000046580	Gm7862	0.680093	2.15573	1.7253	1.24948	0.211489	NA
ENSMUSG00000110754	4930405J17Rik	8.54454	2.15512	0.544653	3.95687	7.59389e-05	0.000666635
ENSMUSG00000100392	Gm28935	0.673525	2.15373	1.72782	1.2465	0.21258	NA
ENSMUSG00000109779	Gm18780	0.391105	2.15327	2.20363	0.97715	0.328495	NA
ENSMUSG00000100367	Gm29336	0.696884	2.15278	2.04995	1.05016	0.293644	NA
ENSMUSG00000107126	Gm40289	0.390592	2.15184	2.2039	0.976377	0.328878	NA
ENSMUSG00000117096	AC151266.1	0.390592	2.15184	2.2039	0.976377	0.328878	NA
ENSMUSG00000099693	Gm29284	0.392944	2.1513	3.11431	0.690779	0.489704	NA
ENSMUSG00000016150	Tenm1	14.0142	2.15032	0.667614	3.2209	0.00127788	0.00766075
ENSMUSG00000088790	Gm22541	0.390042	2.15029	2.20419	0.975546	0.32929	NA
ENSMUSG00000053194	Cib4	0.390042	2.15029	2.20419	0.975546	0.32929	NA
ENSMUSG00000071113	Mboat4	0.390042	2.15029	2.20419	0.975546	0.32929	NA
ENSMUSG00000065307	Gm23247	0.390042	2.15029	2.20419	0.975546	0.32929	NA
ENSMUSG00000030278	Cidec	2.08531	2.14959	1.15062	1.8682	0.0617337	0.175925
ENSMUSG00000108206	Gm44427	0.391141	2.14724	2.80435	0.765684	0.443865	NA
ENSMUSG00000088076	Gm22815	0.391141	2.14724	2.80435	0.765684	0.443865	NA
ENSMUSG00000115342	Gm49095	0.391141	2.14724	2.80435	0.765684	0.443865	NA
ENSMUSG00000038580	Sct	5.75725	2.14707	0.662836	3.23922	0.00119857	0.00725493
ENSMUSG00000077082	Gm23766	0.669895	2.1467	1.78679	1.20143	0.229585	NA
ENSMUSG00000070687	Htr1d	11.7225	2.14653	0.482421	4.4495	8.60713e-06	9.52544e-05
ENSMUSG00000114361	Gm31104	2.60826	2.14513	0.849935	2.52388	0.0116068	0.04797
ENSMUSG00000108274	Gm44169	0.388203	2.14499	2.20514	0.972722	0.330692	NA
ENSMUSG00000107470	Gm3375	0.388203	2.14499	2.20514	0.972722	0.330692	NA
ENSMUSG00000113745	Gm19340	0.388203	2.14499	2.20514	0.972722	0.330692	NA
ENSMUSG00000113312	Gm48052	0.388203	2.14499	2.20514	0.972722	0.330692	NA
ENSMUSG00000117168	AC110168.1	0.388203	2.14499	2.20514	0.972722	0.330692	NA
ENSMUSG00000088601	Gm24190	3.60215	2.14417	0.72262	2.96721	0.00300517	0.0158266
ENSMUSG00000077844	Gm22231	0.387653	2.14343	2.20543	0.971887	0.331107	NA
ENSMUSG00000076855	Trav16	0.667846	2.1429	2.06609	1.03718	0.299654	NA
ENSMUSG00000076493	Trbj2-2	0.389493	2.14202	2.80619	0.76332	0.445273	NA
ENSMUSG00000107666	4933406J09Rik	0.38659	2.14043	2.20601	0.970272	0.331911	NA
ENSMUSG00000110835	Gm48563	0.38659	2.14043	2.20601	0.970272	0.331911	NA
ENSMUSG00000031906	Smpd3	217.279	2.13864	0.268619	7.96161	1.69812e-15	8.75328e-14
ENSMUSG00000099036	Mir378c	4.13196	2.13785	0.804382	2.65775	0.00786637	0.0349488
ENSMUSG00000085295	4930430E12Rik	10.4082	2.1356	0.656749	3.25177	0.0011469	0.00697949
ENSMUSG00000078234	Klhdc7a	205.446	2.13534	0.603127	3.54045	0.000399443	0.0027869
ENSMUSG00000076884	Traj46	0.38714	2.13485	2.76664	0.771639	0.440328	NA
ENSMUSG00000033177	Tmprss7	5.27259	2.13288	0.68839	3.09836	0.00194598	0.0109341
ENSMUSG00000098934	Gm18853	33.3051	2.13259	0.550145	3.87642	0.000106005	0.00088889
ENSMUSG00000033715	Akr1c14	7990.33	2.13154	0.295312	7.21794	5.27811e-13	2.03566e-11
ENSMUSG00000110059	Olfr528-ps1	0.386041	2.13136	2.76787	0.770035	0.441279	NA
ENSMUSG00000086891	Gm15963	3.68034	2.13122	1.06611	1.99907	0.0456006	0.139098
ENSMUSG00000078606	Gm4070	380.402	2.13069	0.450921	4.7252	2.29886e-06	2.93164e-05
ENSMUSG00000083477	Gm5555	2.06238	2.12905	1.08978	1.95365	0.050743	0.151258
ENSMUSG00000027514	Zbp1	636.913	2.12891	0.750042	2.83838	0.00453428	0.0221851
ENSMUSG00000094174	Ighv6-4	2.0529	2.1288	1.12213	1.89711	0.0578133	0.167123
ENSMUSG00000104881	Gm43711	1.0902	2.12751	1.54893	1.37354	0.169585	0.360244
ENSMUSG00000102590	Mannr	16.8331	2.1271	0.406889	5.2277	1.71628e-07	2.77061e-06
ENSMUSG00000109814	Gm45847	8.71461	2.12184	0.546219	3.88459	0.000102502	0.000865712
ENSMUSG00000052631	Sh2d6	9.20545	2.12157	0.485823	4.36696	1.2599e-05	0.000133461
ENSMUSG00000071716	Apol7e	5.05301	2.12131	0.866821	2.44723	0.0143958	0.0570479
ENSMUSG00000106093	Gm42722	4.60247	2.12096	0.862323	2.45959	0.0139095	0.0555166
ENSMUSG00000109473	B930025P03Rik	0.382589	2.11985	2.81404	0.753312	0.451263	NA
ENSMUSG00000050423	Ppp1r3g	0.382589	2.11985	2.81404	0.753312	0.451263	NA
ENSMUSG00000076826	Trav4-2	0.382589	2.11985	2.81404	0.753312	0.451263	NA
ENSMUSG00000021977	1700129C05Rik	0.382589	2.11985	2.81404	0.753312	0.451263	NA
ENSMUSG00000072188	Gm10354	8.21408	2.11982	0.579144	3.66026	0.000251956	0.00187276
ENSMUSG00000090021	Gm6493	8.24869	2.11958	0.570275	3.71676	0.00020179	0.00155032
ENSMUSG00000092517	Art2a-ps	35.5896	2.11936	0.54556	3.88475	0.000102437	0.000865436
ENSMUSG00000076922	Traj6	3.06792	2.11914	1.15843	1.82932	0.0673515	0.187401
ENSMUSG00000008461	Fut1	3.61727	2.11664	0.766848	2.76018	0.00577687	0.0270473
ENSMUSG00000022534	Mefv	64.0178	2.1145	1.14239	1.85094	0.0641776	0.181017
ENSMUSG00000037035	Inhbb	3860.12	2.11423	0.204538	10.3366	4.81264e-25	6.65353e-23
ENSMUSG00000027186	Elf5	12.5581	2.11389	0.616676	3.42788	0.000608325	0.00402252
ENSMUSG00000027718	Il21	1.53204	2.11363	1.76871	1.19501	0.232083	0.44459
ENSMUSG00000011154	Cfap161	16.3838	2.11211	0.480454	4.39606	1.10232e-05	0.00011816
ENSMUSG00000004885	Crabp2	58.1267	2.11207	0.430311	4.90823	9.19022e-07	1.27645e-05
ENSMUSG00000016498	Pdcd1lg2	6.08908	2.11068	1.03212	2.045	0.0408553	0.127612
ENSMUSG00000097928	Gm26578	17.07	2.10933	0.347476	6.07044	1.2756e-09	3.00602e-08
ENSMUSG00000083034	Olfr334-ps1	2.22362	2.10908	1.54605	1.36417	0.172514	0.364712
ENSMUSG00000037393	Nmur2	114.225	2.10764	0.400433	5.26342	1.41403e-07	2.31597e-06
ENSMUSG00000050762	Prss27	6.71569	2.10636	0.574375	3.66722	0.000245201	0.00183113
ENSMUSG00000017064	Prl5a1	0.379137	2.10567	3.11709	0.675523	0.499344	NA
ENSMUSG00000085302	Trav8-2	0.379137	2.10567	3.11709	0.675523	0.499344	NA
ENSMUSG00000073420	Btnl5-ps	0.379137	2.10567	3.11709	0.675523	0.499344	NA
ENSMUSG00000115153	Gm49240	1.54604	2.10535	1.22026	1.72532	0.0844695	0.221239
ENSMUSG00000098268	Gm27514	3.0341	2.10215	0.901309	2.33233	0.0196835	0.0727583
ENSMUSG00000094651	Gal3st2	3.9349	2.101	0.839669	2.50218	0.0123431	0.0504256
ENSMUSG00000097310	A930038B10Rik	1.49703	2.10077	1.1516	1.82422	0.0681189	0.188951
ENSMUSG00000018849	Wwc1	845.807	2.09808	0.42344	4.95484	7.23917e-07	1.025e-05
ENSMUSG00000020183	Cpm	371.996	2.09763	0.427715	4.90426	9.37789e-07	1.30051e-05
ENSMUSG00000074346	Kcnd3os	4.04577	2.09692	0.714681	2.93407	0.00334553	0.0172881
ENSMUSG00000082583	Olfr336-ps1	1.04297	2.09217	1.4636	1.42947	0.15287	0.335917
ENSMUSG00000049723	Mmp12	23.9917	2.08992	0.441625	4.73234	2.21945e-06	2.83574e-05
ENSMUSG00000081399	Gm14921	1.54706	2.0892	1.12405	1.85863	0.0630794	0.178667
ENSMUSG00000017723	Wfdc2	1485.8	2.089	0.39615	5.27325	1.34027e-07	2.20453e-06
ENSMUSG00000037946	Fgd3	720.137	2.08572	0.162016	12.8736	6.3391e-38	2.55068e-35
ENSMUSG00000100291	2310069B03Rik	10.3165	2.08533	0.734889	2.83761	0.00454522	0.0222144
ENSMUSG00000116555	AC129178.1	8.49411	2.08523	0.602597	3.46041	0.000539356	0.00362064
ENSMUSG00000083748	Gm11662	46.9956	2.08267	0.295149	7.05633	1.70963e-12	6.17828e-11
ENSMUSG00000108179	Gm44274	2.98977	2.08251	1.10231	1.88923	0.0588617	0.169517
ENSMUSG00000084025	Gm6276	14.6433	2.08148	0.372272	5.59129	2.25394e-08	4.34338e-07
ENSMUSG00000110554	Gm35256	1.06328	2.08123	1.29723	1.60437	0.108633	0.265902
ENSMUSG00000078921	Tgtp2	489.926	2.07865	0.883791	2.35197	0.0186742	0.070029
ENSMUSG00000004988	Fxyd4	128.724	2.07837	0.380689	5.45948	4.77539e-08	8.63445e-07
ENSMUSG00000018168	Ikzf3	138.293	2.07827	0.306868	6.77254	1.2654e-11	4.00672e-10
ENSMUSG00000024479	Mal2	1005.68	2.07757	0.315669	6.58148	4.65798e-11	1.37246e-09
ENSMUSG00000045868	Gvin1	313.308	2.07692	0.450439	4.61088	4.00961e-06	4.79144e-05
ENSMUSG00000103638	Gm38327	1.59081	2.07373	1.23948	1.67307	0.0943145	0.239441
ENSMUSG00000102715	Gm6209	1.45961	2.07336	1.34252	1.54438	0.122496	0.289277
ENSMUSG00000107967	Gm44094	3.0955	2.07265	0.992305	2.08872	0.0367325	0.117833
ENSMUSG00000082082	Gm13230	3.45127	2.0726	0.98897	2.09571	0.0361078	0.116168
ENSMUSG00000036856	Wnt4	82.4438	2.07013	0.190006	10.8951	1.21699e-27	2.08974e-25
ENSMUSG00000028766	Alpl	222.666	2.0696	0.338326	6.11719	9.52405e-10	2.29865e-08
ENSMUSG00000087341	0610040F04Rik	1.53055	2.0696	1.09198	1.89527	0.0580567	0.167665
ENSMUSG00000052912	Smarca5-ps	8.10475	2.06924	0.506359	4.0865	4.37927e-05	0.000409749
ENSMUSG00000019866	Crybg1	599.706	2.06912	0.219796	9.4138	4.78512e-21	4.59082e-19
ENSMUSG00000060550	H2-Q7	779.782	2.06906	0.913658	2.26459	0.0235377	0.0836257
ENSMUSG00000023039	Krt7	3902.75	2.06828	0.338968	6.1017	1.04944e-09	2.50149e-08
ENSMUSG00000078627	2019-03-10	1.04102	2.06753	1.35805	1.52243	0.127901	0.297557
ENSMUSG00000101156	Gm29114	14.1941	2.06629	0.393073	5.25675	1.46624e-07	2.38987e-06
ENSMUSG00000115868	Gm2999	1.0273	2.06621	1.40105	1.47475	0.140279	0.317183
ENSMUSG00000101028	Gm28723	2.50988	2.06429	0.879567	2.34694	0.0189284	0.0706577
ENSMUSG00000033219	Gm9758	4.43213	2.0632	0.730467	2.82449	0.00473555	0.0229821
ENSMUSG00000104350	Gm38244	33.5802	2.06315	0.393144	5.24782	1.53906e-07	2.49799e-06
ENSMUSG00000109052	Gm45012	1.99091	2.06085	1.09892	1.87533	0.060747	0.173685
ENSMUSG00000105263	Gm42427	1.00779	2.05969	1.45871	1.41199	0.157952	0.343711
ENSMUSG00000049721	Gal3st1	8.33859	2.05927	0.644222	3.19653	0.00139093	0.00821426
ENSMUSG00000028341	Nr4a3	154.834	2.05812	0.226103	9.10259	8.82025e-20	7.47907e-18
ENSMUSG00000079014	Serpina3i	10.1691	2.05777	1.13576	1.81181	0.070016	0.192904
ENSMUSG00000003617	Cp	2987.52	2.05774	0.35236	5.83986	5.22452e-09	1.12949e-07
ENSMUSG00000085360	Arhgap27os2	8.96344	2.05456	0.583261	3.52253	0.000427448	0.00295855
ENSMUSG00000024486	Hbegf	166.508	2.0516	0.166443	12.3261	6.55263e-35	2.1543e-32
ENSMUSG00000039518	Cdsn	25.2379	2.05157	0.312824	6.55823	5.44493e-11	1.59036e-09
ENSMUSG00000076914	Traj15	1.44608	2.05056	1.33918	1.53121	0.125719	0.294423
ENSMUSG00000096086	Gm4761	1.03352	2.04934	1.39485	1.46922	0.141774	0.319386
ENSMUSG00000095794	Igkv6-17	7.25409	2.0464	1.07693	1.90022	0.0574041	0.166172
ENSMUSG00000090685	Atp6v1fnb	0.997785	2.04572	1.39946	1.46179	0.143798	0.322597
ENSMUSG00000025165	Sectm1a	28.27	2.0443	0.686494	2.97788	0.0029025	0.0153549
ENSMUSG00000005609	Ctr9	3640.07	2.04417	0.167665	12.192	3.43105e-34	1.06319e-31
ENSMUSG00000033027	Klrc3	1.94259	2.04355	1.13521	1.80015	0.0718366	0.196414
ENSMUSG00000117485	AC132455.2	3.37495	2.0433	0.768475	2.65891	0.00783946	0.0348465
ENSMUSG00000099707	Gm8883	27.7186	2.04181	0.354958	5.75225	8.80621e-09	1.81642e-07
ENSMUSG00000082116	Gm12188	1.45077	2.04091	1.28179	1.59223	0.111332	0.270352
ENSMUSG00000082070	Gm1866	0.653424	2.04027	1.80533	1.13014	0.258416	NA
ENSMUSG00000090041	Gm16027	0.659621	2.04011	1.80223	1.13199	0.257638	NA
ENSMUSG00000092171	4833427F10Rik	28.1924	2.03963	0.381468	5.34679	8.95269e-08	1.52853e-06
ENSMUSG00000085068	Gm15895	11.9709	2.0393	0.604455	3.37378	0.000741429	0.00477843
ENSMUSG00000097288	Gm2155	0.990881	2.03778	1.39816	1.45748	0.144985	0.324209
ENSMUSG00000107397	4930402H05Rik	1.46947	2.03752	1.16079	1.75529	0.0792101	0.211081
ENSMUSG00000105442	Gm42614	2.9924	2.03718	0.891123	2.28608	0.0222497	0.080084
ENSMUSG00000101848	4933417E11Rik	47.4838	2.03591	0.397886	5.11682	3.10737e-07	4.76788e-06
ENSMUSG00000019892	Lrriq1	23.2105	2.03587	0.460601	4.42003	9.86852e-06	0.000107798
ENSMUSG00000090307	1700071M16Rik	31.1129	2.03522	0.655063	3.10691	0.00189055	0.0106715
ENSMUSG00000085889	1700054M17Rik	1.45645	2.03519	1.26749	1.60568	0.108344	0.265483
ENSMUSG00000006411	Nectin4	211.363	2.03508	0.250998	8.10796	5.14786e-16	2.81503e-14
ENSMUSG00000035189	Ano4	103.248	2.0343	0.349215	5.82536	5.69908e-09	1.22035e-07
ENSMUSG00000104376	Gm37516	1.48594	2.03395	1.34372	1.51367	0.13011	0.30111
ENSMUSG00000021556	Golm1	1684.01	2.03337	0.233963	8.69098	3.59335e-18	2.50967e-16
ENSMUSG00000086513	9130208D14Rik	39.6118	2.03316	0.422968	4.80689	1.53298e-06	2.02985e-05
ENSMUSG00000089822	Gm15759	0.984753	2.03154	1.35506	1.49922	0.133817	0.307367
ENSMUSG00000094665	Gm24873	0.988787	2.03078	1.29205	1.57175	0.116008	0.278418
ENSMUSG00000114185	Gm47662	1.95077	2.02743	1.1758	1.7243	0.0846546	0.221573
ENSMUSG00000041460	Cacna2d4	16.654	2.02232	0.401462	5.03738	4.71953e-07	6.97172e-06
ENSMUSG00000046879	Irgm1	1497.55	2.02044	0.63027	3.20568	0.00134743	0.00800647
ENSMUSG00000029822	Osbpl3	952.621	2.02044	0.204363	9.88653	4.76261e-23	5.44048e-21
ENSMUSG00000107460	Gm44186	1.00061	2.01927	1.44106	1.40124	0.161143	0.348348
ENSMUSG00000101462	Gm3052	52.9795	2.01597	0.344041	5.85967	4.63789e-09	1.00752e-07
ENSMUSG00000054753	AU018091	0.972949	2.01585	1.50229	1.34185	0.179643	0.375543
ENSMUSG00000026058	Khdrbs2	13.3955	2.01521	0.59838	3.36778	0.000757749	0.00486848
ENSMUSG00000073554	Gm6960	2.53103	2.01503	1.26354	1.59475	0.110769	0.269636
ENSMUSG00000032495	Lrrc2	3.39287	2.01464	0.795581	2.53229	0.011332	0.0471233
ENSMUSG00000041923	Nol4	0.989566	2.01394	1.70566	1.18074	0.237705	0.451098
ENSMUSG00000029188	Slc34a2	450.393	2.01294	0.739493	2.72206	0.00648761	0.0298361
ENSMUSG00000028654	Mycl	45.9233	2.01197	0.215249	9.34718	9.00188e-21	8.45581e-19
ENSMUSG00000035539	Ccdc180	5.86767	2.01055	0.588769	3.41484	0.000638198	0.00419607
ENSMUSG00000038357	Camp	0.969012	2.0092	1.41165	1.4233	0.15465	0.338658
ENSMUSG00000105753	Gm43847	43.03	2.00858	0.334229	6.0096	1.85981e-09	4.25986e-08
ENSMUSG00000029651	Mtus2	73.0239	2.00817	0.237913	8.44076	3.15286e-17	1.95848e-15
ENSMUSG00000028217	Cdh17	11.9986	2.00794	0.668173	3.00513	0.0026547	0.0142282
ENSMUSG00000041347	Bdkrb1	15.0779	2.00757	0.383765	5.23126	1.68355e-07	2.72104e-06
ENSMUSG00000101968	1700027A15Rik	0.959154	2.00669	1.35122	1.4851	0.137518	0.313138
ENSMUSG00000092085	Gm17224	1.95527	2.00546	0.965675	2.07674	0.0378254	0.120252
ENSMUSG00000114732	Gm40918	0.635052	2.00484	1.76269	1.13737	0.255382	NA
ENSMUSG00000101463	Gm28750	0.63578	2.00483	1.76231	1.13761	0.255283	NA
ENSMUSG00000023034	Nr4a1	399.338	2.00385	0.257418	7.78445	7.00173e-15	3.38886e-13
ENSMUSG00000019850	Tnfaip3	275.664	2.00375	0.590084	3.3957	0.000684544	0.00445872
ENSMUSG00000078920	Ifi47	382.878	2.00373	0.660156	3.03523	0.00240349	0.0130742
ENSMUSG00000085717	Hmgb4os	0.640699	2.00363	1.75941	1.13881	0.254782	NA
ENSMUSG00000114933	Gm48040	0.640699	2.00363	1.75941	1.13881	0.254782	NA
ENSMUSG00000095565	Ighv2-9-1	9.50171	2.00297	0.864184	2.31776	0.0204623	0.0749252
ENSMUSG00000097954	Gm4217	0.630651	2.00281	1.76433	1.13517	0.256305	NA
ENSMUSG00000101376	Gm18291	0.633989	2.00275	1.76257	1.13626	0.255847	NA
ENSMUSG00000107890	Gm43968	0.634716	2.00273	1.76219	1.1365	0.255748	NA
ENSMUSG00000112184	Gm48826	0.65485	2.00235	1.75188	1.14297	0.253049	NA
ENSMUSG00000052955	Cpvl	0.980529	2.00087	1.47851	1.3533	0.17596	0.369793
ENSMUSG00000025002	Cyp2c55	0.961349	1.99982	1.39145	1.43722	0.150655	0.33261
ENSMUSG00000035020	Epgn	3.78731	1.99917	0.712658	2.80523	0.00502806	0.0241538
ENSMUSG00000034783	Cd207	0.638023	1.99836	1.75909	1.13602	0.255949	NA
ENSMUSG00000073409	H2-Q6	699.291	1.99733	0.869814	2.29628	0.0216601	0.0783717
ENSMUSG00000117608	AC103362.1	3.43456	1.99707	0.774937	2.57707	0.0099642	0.0426109
ENSMUSG00000077846	Gm22232	0.631778	1.99682	1.76183	1.13338	0.257056	NA
ENSMUSG00000079534	Gm5640	1.88866	1.99667	1.00724	1.98233	0.0474428	0.143451
ENSMUSG00000027901	Dennd2d	184.561	1.99666	0.248344	8.03991	8.99018e-16	4.76162e-14
ENSMUSG00000081611	Gm13651	11.9422	1.99616	0.517754	3.85543	0.000115528	0.000958018
ENSMUSG00000110341	Gm45424	13.7143	1.99452	0.508875	3.91948	8.87406e-05	0.000762383
ENSMUSG00000064369	mt-Te	2.83208	1.99356	1.09606	1.81885	0.0689346	0.190645
ENSMUSG00000021538	Il9	0.639636	1.99336	1.57484	1.26575	0.205602	NA
ENSMUSG00000063804	Lin28b	0.654301	1.99307	1.56955	1.26984	0.204143	NA
ENSMUSG00000112325	Gm48454	0.628924	1.99263	1.76198	1.1309	0.258095	NA
ENSMUSG00000083814	Gm5133	0.629652	1.99262	1.76159	1.13114	0.257994	NA
ENSMUSG00000092704	Gm24512	0.635121	1.99253	1.75872	1.13294	0.257239	NA
ENSMUSG00000049971	Glt1d1	0.960879	1.99229	1.6477	1.20914	0.226609	0.438132
ENSMUSG00000039372	2019-03-04	4.72446	1.99182	0.667113	2.98573	0.00282902	0.0150281
ENSMUSG00000105908	Mir6920	1.91128	1.99041	1.02387	1.94401	0.0518946	0.153891
ENSMUSG00000060556	Olfr1418	0.634022	1.99035	1.75859	1.13179	0.257725	NA
ENSMUSG00000073102	Drc1	6.28677	1.99014	0.54789	3.63238	0.00028082	0.00205779
ENSMUSG00000082087	Gm12138	1.39917	1.98996	1.21169	1.6423	0.100527	0.250991
ENSMUSG00000064281	Rpl19-ps1	0.957169	1.98765	1.7703	1.12277	0.261534	0.480484
ENSMUSG00000109127	Gm31135	0.629987	1.98734	1.57668	1.26046	0.207503	NA
ENSMUSG00000106214	Gm43426	18.9616	1.98703	0.351697	5.64985	1.6059e-08	3.181e-07
ENSMUSG00000049555	Tmie	42.3258	1.98672	0.289932	6.85236	7.26431e-12	2.38246e-10
ENSMUSG00000003948	Mmd	760.162	1.98651	0.167526	11.8579	1.95901e-32	5.28129e-30
ENSMUSG00000097280	AI849053	0.630165	1.98636	1.57634	1.26011	0.207629	NA
ENSMUSG00000092093	Gm17528	3.7709	1.9858	0.695104	2.85684	0.00427884	0.0211115
ENSMUSG00000071342	Lsmem1	0.624373	1.98351	1.76146	1.12606	0.26014	NA
ENSMUSG00000109963	Gm45635	4.46769	1.98292	0.801235	2.47483	0.0133299	0.053705
ENSMUSG00000089993	Gm5822	4.80034	1.98286	0.618538	3.20571	0.00134728	0.00800647
ENSMUSG00000048498	Cd300e	9.55169	1.98125	1.11337	1.7795	0.0751575	0.203105
ENSMUSG00000093765	Gm20658	2.32995	1.98087	1.00407	1.97285	0.0485126	0.145895
ENSMUSG00000015312	Gadd45b	132.12	1.98037	0.215006	9.21078	3.23767e-20	2.84314e-18
ENSMUSG00000065145	Vaultrc5	31.8492	1.98036	0.633865	3.12426	0.0017825	0.0101509
ENSMUSG00000104592	Gm42721	9.89216	1.9761	0.687068	2.87614	0.0040257	0.0200718
ENSMUSG00000093105	Gm25535	1.91136	1.97411	0.979162	2.01612	0.0437874	0.13491
ENSMUSG00000109719	Gm45266	18.2572	1.97322	0.642052	3.07331	0.00211699	0.0117384
ENSMUSG00000114854	Gm34354	1.90313	1.97195	1.08856	1.81152	0.0700603	0.192967
ENSMUSG00000009292	Trpm2	90.3382	1.97107	0.838261	2.35137	0.0187042	0.0700828
ENSMUSG00000087232	Gm14764	2.87805	1.97	0.826525	2.38347	0.0171504	0.0655639
ENSMUSG00000062554	Gm12751	0.613742	1.96942	2.16497	0.909676	0.362994	NA
ENSMUSG00000105606	Igkv2-109	2.33139	1.9676	1.5309	1.28525	0.198703	0.401918
ENSMUSG00000090486	BC035947	2.32763	1.9658	0.965413	2.03623	0.0417274	0.129854
ENSMUSG00000060985	Tdrd5	2.80654	1.96555	1.14233	1.72065	0.085314	0.222842
ENSMUSG00000074677	Sirpb1c	53.617	1.96478	1.20562	1.62969	0.103168	0.255833
ENSMUSG00000053268	Dspp	1.36003	1.96045	1.79404	1.09275	0.274502	0.494705
ENSMUSG00000005892	Trh	0.60615	1.95972	2.16795	0.903951	0.366022	NA
ENSMUSG00000102398	Gm37580	0.609667	1.95646	1.80272	1.08528	0.277796	NA
ENSMUSG00000057454	Lypd3	0.609667	1.95646	1.80272	1.08528	0.277796	NA
ENSMUSG00000115546	Gm49077	0.629801	1.95638	1.79192	1.09178	0.27493	NA
ENSMUSG00000082446	Gm13863	9.91226	1.95535	0.622421	3.14153	0.00168069	0.00964036
ENSMUSG00000113811	Gm47882	0.61018	1.95515	1.57501	1.24135	0.214475	NA
ENSMUSG00000100241	Slc18a3	2.4236	1.95478	1.12759	1.7336	0.0829894	0.21836
ENSMUSG00000028434	Epb41l4b	422.035	1.9538	0.308096	6.34152	2.27511e-10	5.99558e-09
ENSMUSG00000056032	BC018473	0.604276	1.95186	1.57639	1.23818	0.215649	NA
ENSMUSG00000073233	Gm9144	0.604276	1.95186	1.57639	1.23818	0.215649	NA
ENSMUSG00000073699	Gm833	0.608341	1.95184	1.57481	1.23941	0.215192	NA
ENSMUSG00000034171	Faah	43.5436	1.95	0.258868	7.5328	4.96645e-14	2.16301e-12
ENSMUSG00000028460	Sit1	1.37025	1.9497	1.271	1.53399	0.125031	0.29342
ENSMUSG00000086124	A530076I17Rik	1.37272	1.9484	1.14476	1.70201	0.0887535	0.229472
ENSMUSG00000022455	Wbp2nl	0.602663	1.94809	1.4626	1.33194	0.182879	NA
ENSMUSG00000115418	Gm49296	0.605451	1.94809	1.57489	1.23697	0.216098	NA
ENSMUSG00000098840	Mir7679	0.606001	1.94809	1.46167	1.33278	0.182603	NA
ENSMUSG00000058925	Ccdc192	7.49274	1.94608	0.493565	3.9429	8.05023e-05	0.00070031
ENSMUSG00000005672	Kit	223.278	1.94477	0.259603	7.49132	6.81858e-14	2.9271e-12
ENSMUSG00000085102	1700010K24Rik	0.598661	1.94199	1.57587	1.23233	0.217824	NA
ENSMUSG00000088885	Gm24217	0.598147	1.9411	1.76202	1.10163	0.270622	NA
ENSMUSG00000092591	Gm20429	3.85427	1.94045	1.17882	1.64609	0.0997446	0.249682
ENSMUSG00000025380	Fscn2	9.31262	1.94034	0.475613	4.07966	4.51011e-05	0.000420401
ENSMUSG00000099190	Gm27188	0.621798	1.94017	1.56647	1.23856	0.215508	NA
ENSMUSG00000104025	E330040D14Rik	0.601664	1.94016	1.57418	1.23249	0.217767	NA
ENSMUSG00000107526	1700003I16Rik	0.600936	1.94016	1.57446	1.23227	0.21785	NA
ENSMUSG00000012705	Retn	0.597598	1.94016	1.57578	1.23124	0.218234	NA
ENSMUSG00000025014	Dntt	0.597598	1.94016	1.57578	1.23124	0.218234	NA
ENSMUSG00000039691	Tspan10	1.37223	1.93735	1.26104	1.5363	0.124464	0.292336
ENSMUSG00000030103	Bhlhe40	1153.98	1.93701	0.164988	11.7403	7.92185e-32	1.99593e-29
ENSMUSG00000093755	Vmn1r39	3.64263	1.93701	0.724231	2.67457	0.00748249	0.033553
ENSMUSG00000102051	I830127L07Rik	4.09902	1.93511	1.39167	1.39049	0.164381	0.352999
ENSMUSG00000096238	Gm22583	0.619409	1.93503	1.79099	1.08042	0.279953	NA
ENSMUSG00000073802	Cdkn2b	39.7153	1.933	0.301002	6.42186	1.34619e-10	3.68447e-09
ENSMUSG00000098534	Gm27167	0.597484	1.93283	1.80237	1.07238	0.283549	NA
ENSMUSG00000108184	Gm44198	0.596935	1.93171	1.80235	1.07178	0.283821	NA
ENSMUSG00000048485	Zbtb8b	240.944	1.93159	0.36847	5.2422	1.58671e-07	2.57068e-06
ENSMUSG00000112535	Gm47425	15.4034	1.93047	0.355267	5.43387	5.5144e-08	9.8322e-07
ENSMUSG00000032358	Fam83b	29.5404	1.9302	0.342145	5.64147	1.68604e-08	3.32267e-07
ENSMUSG00000028613	Lrp8	77.0799	1.9302	0.230533	8.37277	5.62787e-17	3.45607e-15
ENSMUSG00000026166	Ccl20	8.00777	1.93009	0.852659	2.26361	0.0235979	0.0837424
ENSMUSG00000032883	Acsl3	745.897	1.9293	0.173266	11.1349	8.4812e-29	1.59891e-26
ENSMUSG00000100462	Gm28115	0.344294	1.92557	2.8952	0.66509	0.505993	NA
ENSMUSG00000075402	Krt76	0.344294	1.92557	2.8952	0.66509	0.505993	NA
ENSMUSG00000096818	Gm29231	0.344294	1.92557	2.8952	0.66509	0.505993	NA
ENSMUSG00000044359	P2ry4	0.344294	1.92557	2.8952	0.66509	0.505993	NA
ENSMUSG00000106004	Gm43391	35.6494	1.92556	0.366404	5.2553	1.47784e-07	2.40613e-06
ENSMUSG00000031538	Plat	1791.07	1.92545	0.177533	10.8455	2.09381e-27	3.50602e-25
ENSMUSG00000012187	Mogat1	2.27954	1.92329	1.16522	1.65058	0.0988242	0.247971
ENSMUSG00000098679	Mir7688	0.343231	1.92165	2.89668	0.663396	0.507077	NA
ENSMUSG00000021789	Sftpa1	0.343231	1.92165	2.89668	0.663396	0.507077	NA
ENSMUSG00000092219	Gm20443	0.343231	1.92165	2.89668	0.663396	0.507077	NA
ENSMUSG00000081414	Gm3943	0.343231	1.92165	2.89668	0.663396	0.507077	NA
ENSMUSG00000029019	Nppb	11.2533	1.92122	0.50037	3.8396	0.000123234	0.00101443
ENSMUSG00000095334	Gm21984	1.3722	1.92089	1.33761	1.43606	0.150984	0.33315
ENSMUSG00000081592	Gm11936	0.342681	1.91961	2.89744	0.662518	0.507639	NA
ENSMUSG00000107543	Gm34701	0.342681	1.91961	2.89744	0.662518	0.507639	NA
ENSMUSG00000045087	S1pr5	6.483	1.91907	0.760356	2.5239	0.011606	0.04797
ENSMUSG00000116223	Gm41396	0.956171	1.91887	1.55241	1.23606	0.216435	0.425437
ENSMUSG00000042993	Ifnk	12.1354	1.91879	0.438463	4.37618	1.20777e-05	0.000128697
ENSMUSG00000046341	Gm11223	1.38171	1.91833	1.32321	1.44976	0.147127	0.327395
ENSMUSG00000028747	Htr6	0.58942	1.91822	1.80246	1.06422	0.287227	NA
ENSMUSG00000064554	n-R5s173	0.587629	1.91679	1.7601	1.08902	0.276144	NA
ENSMUSG00000032261	Sh3bgrl2	1134.92	1.9165	0.166436	11.515	1.10924e-30	2.37333e-28
ENSMUSG00000025997	Ikzf2	383.288	1.9163	0.192147	9.97308	1.99938e-23	2.37451e-21
ENSMUSG00000051592	Ccnb3	0.587807	1.9157	1.75965	1.08868	0.276294	NA
ENSMUSG00000016327	Atp1b4	5.05309	1.91411	0.630249	3.03707	0.00238887	0.0130104
ENSMUSG00000114791	Gm47730	0.606878	1.91381	1.74825	1.0947	0.273648	NA
ENSMUSG00000027643	Ghrh	8.69501	1.9136	0.608223	3.14622	0.00165398	0.00951329
ENSMUSG00000084809	Gm12631	0.582678	1.91353	1.76193	1.08604	0.27746	NA
ENSMUSG00000113744	Gm47925	0.946021	1.91259	1.51859	1.25945	0.207867	0.414275
ENSMUSG00000082510	Gm11793	0.603426	1.91229	1.56578	1.2213	0.221972	NA
ENSMUSG00000043753	Dmrta1	47.5196	1.91205	0.416421	4.59162	4.39813e-06	5.19585e-05
ENSMUSG00000095972	Gm23512	0.579226	1.91195	1.57538	1.21364	0.224884	NA
ENSMUSG00000094977	Gm25256	0.585466	1.91162	1.80275	1.06039	0.288968	NA
ENSMUSG00000113354	Gm20789	0.582128	1.91158	1.80468	1.05924	0.289493	NA
ENSMUSG00000110133	Gm8168	0.588211	1.91113	1.5715	1.21612	0.223938	NA
ENSMUSG00000114354	Gm34961	0.58524	1.91105	1.80272	1.06009	0.289101	NA
ENSMUSG00000053977	Cd8a	17.9262	1.91061	0.915366	2.08726	0.0368644	0.118032
ENSMUSG00000083890	Gm15703	1.87652	1.91038	1.10501	1.72883	0.0838399	0.220018
ENSMUSG00000109262	Gm44744	16.9161	1.90999	0.527655	3.61977	0.00029486	0.00214667
ENSMUSG00000042096	Dao	2.30076	1.90742	1.1454	1.6653	0.0958537	0.242435
ENSMUSG00000042184	1700069L16Rik	0.339229	1.90668	2.9023	0.656957	0.511209	NA
ENSMUSG00000109880	Gm34096	0.339229	1.90668	2.9023	0.656957	0.511209	NA
ENSMUSG00000065193	Gm23459	0.339229	1.90668	2.9023	0.656957	0.511209	NA
ENSMUSG00000079543	Igkv13-85	0.58623	1.90647	2.16839	0.879209	0.379288	NA
ENSMUSG00000113352	Gm34639	0.584917	1.90508	2.16905	0.878304	0.379779	NA
ENSMUSG00000044186	Nkx2-6	0.578562	1.90498	1.57377	1.21046	0.226104	NA
ENSMUSG00000022491	Glycam1	0.578562	1.90498	1.57377	1.21046	0.226104	NA
ENSMUSG00000039699	Batf2	80.4467	1.90468	0.828688	2.29843	0.0215371	0.0780193
ENSMUSG00000115503	Gm6392	0.587148	1.90344	1.7561	1.08391	0.278406	NA
ENSMUSG00000088248	Mir1969	0.932441	1.90304	1.51859	1.25316	0.210146	0.417367
ENSMUSG00000113157	Gm48693	0.580175	1.90169	1.75961	1.08075	0.27981	NA
ENSMUSG00000112893	Gm9583	0.580402	1.90114	1.80256	1.05469	0.291568	NA
ENSMUSG00000082018	Gm6322	0.580353	1.9006	1.75915	1.08041	0.279962	NA
ENSMUSG00000033726	Emx1	0.576288	1.90053	1.76153	1.07891	0.280629	NA
ENSMUSG00000024593	Megf10	5.79788	1.89974	0.696196	2.72874	0.00635761	0.0293233
ENSMUSG00000102380	Gm38140	0.961818	1.89886	1.40467	1.35183	0.176431	0.37061
ENSMUSG00000054320	Lrrc36	56.3347	1.89853	0.567932	3.34288	0.000829144	0.00526899
ENSMUSG00000009093	Gstt4	2.30161	1.89786	0.915093	2.07395	0.0380837	0.120987
ENSMUSG00000098426	Gm27149	0.598875	1.89772	1.74755	1.08593	0.27751	NA
ENSMUSG00000047511	Olfr1396	19.0023	1.89592	0.674145	2.81233	0.00491841	0.0237074
ENSMUSG00000029005	Draxin	4.93135	1.89567	0.926	2.04716	0.0406425	0.127065
ENSMUSG00000097541	Gm26752	3.07985	1.89238	0.902523	2.09677	0.0360143	0.115985
ENSMUSG00000107270	Tgif1-ps	0.57511	1.89007	1.80237	1.04866	0.294334	NA
ENSMUSG00000112384	Gm34921	1.88897	1.88978	1.0223	1.84857	0.0645206	0.181643
ENSMUSG00000058064	Gm10036	1.38943	1.88929	1.33717	1.41289	0.157687	0.343355
ENSMUSG00000098871	Mir6381	0.580758	1.88905	1.79873	1.05022	0.293618	NA
ENSMUSG00000020405	Fabp6	1.77495	1.88478	1.12502	1.67534	0.0938685	0.238706
ENSMUSG00000020848	Doc2b	12.4619	1.88438	0.434886	4.33305	1.47056e-05	0.000153782
ENSMUSG00000031584	Gsr	1057.21	1.8841	0.121984	15.4455	8.09141e-54	7.27121e-51
ENSMUSG00000102887	Gm10857	0.928995	1.88334	1.56282	1.20509	0.22817	0.439815
ENSMUSG00000111868	Gm47398	0.911942	1.88161	1.74355	1.07918	0.280506	0.501237
ENSMUSG00000046719	Nxph3	36.923	1.88041	0.268977	6.99096	2.7301e-12	9.57098e-11
ENSMUSG00000101939	Gm28438	2.77113	1.88022	1.06328	1.76831	0.0770091	0.206878
ENSMUSG00000090708	Gm17196	1.35294	1.8791	1.17308	1.60185	0.109189	0.26697
ENSMUSG00000030854	Ptpn5	240.883	1.87881	0.26821	7.00498	2.47021e-12	8.70516e-11
ENSMUSG00000002228	Ppm1j	35.713	1.87819	0.316844	5.92782	3.06987e-09	6.83972e-08
ENSMUSG00000032092	Mpzl2	74.4116	1.87691	0.390575	4.80551	1.54358e-06	2.04287e-05
ENSMUSG00000056716	Gm5420	2.20133	1.87656	0.942077	1.99194	0.0463781	0.141007
ENSMUSG00000086843	E030013I19Rik	174.754	1.87607	0.254495	7.37172	1.68436e-13	6.8593e-12
ENSMUSG00000099037	Gm27554	0.941607	1.87541	1.37348	1.36544	0.172114	0.364151
ENSMUSG00000049538	Adamts16	24.5027	1.87522	0.359002	5.22343	1.75641e-07	2.832e-06
ENSMUSG00000111763	Gm34973	0.920928	1.87336	1.40417	1.33414	0.182157	0.379386
ENSMUSG00000074235	Gm10649	0.92423	1.87329	1.40355	1.33467	0.181983	0.379114
ENSMUSG00000020264	Slc36a2	1.76045	1.87306	1.13501	1.65025	0.0988909	0.248115
ENSMUSG00000055489	Ano5	147.718	1.87233	0.22549	8.30337	1.01199e-16	5.99612e-15
ENSMUSG00000076612	Ighg2c	32.9536	1.87227	1.77664	1.05382	0.291964	0.513784
ENSMUSG00000078664	Sprr2a1	0.590907	1.87	2.1544	0.867989	0.3854	NA
ENSMUSG00000047730	Fcgbp	648.265	1.86987	0.271597	6.88473	5.78989e-12	1.9318e-10
ENSMUSG00000054266	Serpinb9d	3.7335	1.86967	1.14627	1.63108	0.102872	0.255348
ENSMUSG00000087783	Gm23170	0.570046	1.86966	2.17116	0.861136	0.389163	NA
ENSMUSG00000041046	Ramp3	132.648	1.86951	0.341503	5.47436	4.39102e-08	8.00389e-07
ENSMUSG00000034282	Evpl	219.539	1.86887	0.259667	7.19719	6.14661e-13	2.3438e-11
ENSMUSG00000076461	Trbv1	0.569496	1.86835	2.17125	0.860499	0.389514	NA
ENSMUSG00000032083	Apoa1	81.9938	1.86674	0.844954	2.20928	0.0271552	0.0933652
ENSMUSG00000090942	F830016B08Rik	502.449	1.86671	0.754271	2.47485	0.0133293	0.053705
ENSMUSG00000067642	Adgrf3	0.915859	1.86663	1.31216	1.42256	0.154863	0.338876
ENSMUSG00000108584	Gm45216	0.932654	1.86655	1.30998	1.42486	0.154196	0.338021
ENSMUSG00000076907	Traj22	2.65878	1.86637	1.00815	1.85128	0.0641289	0.180918
ENSMUSG00000086289	Gm16933	2.25245	1.86538	1.02101	1.82699	0.0677015	0.188161
ENSMUSG00000113298	Gm48559	0.910244	1.86462	1.51087	1.23414	0.217152	0.426287
ENSMUSG00000040548	Tex2	2799.14	1.86073	0.200804	9.26641	1.92523e-20	1.74169e-18
ENSMUSG00000014782	Plekhg4	15.5733	1.86066	0.439588	4.23274	2.30866e-05	0.000230847
ENSMUSG00000065701	Rny1	242.968	1.8603	0.922678	2.0162	0.0437789	0.134903
ENSMUSG00000078917	Gm11281	1.32032	1.85869	1.30232	1.42722	0.153517	0.336861
ENSMUSG00000100277	1810053B23Rik	0.898485	1.85612	1.40308	1.32289	0.185873	0.384335
ENSMUSG00000033576	Apol6	41.9562	1.85578	0.642051	2.8904	0.00384751	0.0193264
ENSMUSG00000102687	Gm37219	12.1055	1.85397	0.398262	4.65516	3.23735e-06	3.95271e-05
ENSMUSG00000044701	Il27	7.21971	1.85385	0.89773	2.06504	0.0389193	0.122889
ENSMUSG00000100813	Gm28874	8.12698	1.85358	0.535994	3.45822	0.000543758	0.00364747
ENSMUSG00000048188	Gm8181	0.920523	1.85348	1.39829	1.32553	0.184995	0.383578
ENSMUSG00000065388	Gm23099	0.566772	1.85163	2.7106	0.683107	0.494539	NA
ENSMUSG00000097694	G730013B05Rik	2.2857	1.85085	1.07569	1.72061	0.085322	0.222842
ENSMUSG00000064412	Gm22246	0.894698	1.85056	1.40216	1.31979	0.186904	0.385756
ENSMUSG00000104222	Gm7292	0.899618	1.85008	1.31023	1.41203	0.15794	0.343711
ENSMUSG00000098670	Gm27818	1.32726	1.84953	1.33141	1.38915	0.164787	0.353589
ENSMUSG00000050944	Efcab5	64.3654	1.84918	0.320154	5.77591	7.65402e-09	1.5971e-07
ENSMUSG00000023913	Pla2g7	365.299	1.84868	0.684395	2.70119	0.00690927	0.0314322
ENSMUSG00000036718	Micall2	121.104	1.84865	0.217621	8.49481	1.9825e-17	1.26951e-15
ENSMUSG00000047990	C2cd4a	117.761	1.84737	0.459722	4.01845	5.85834e-05	0.000529805
ENSMUSG00000098766	Mir6386	4.81408	1.84608	0.702216	2.62893	0.00856528	0.0375404
ENSMUSG00000105982	Mir6896	0.914347	1.84588	1.30729	1.41199	0.157952	0.343711
ENSMUSG00000096775	Gm5796	1.7445	1.8456	1.25784	1.46728	0.142301	0.320065
ENSMUSG00000114576	Naip3-ps1	7.84113	1.84523	0.498137	3.70427	0.000212004	0.00161956
ENSMUSG00000086221	4930412B13Rik	2.17816	1.84466	0.930315	1.98283	0.047386	0.143295
ENSMUSG00000038201	Kcna7	0.32192	1.84418	2.92914	0.629598	0.528958	NA
ENSMUSG00000086976	Gm12316	0.32192	1.84418	2.92914	0.629598	0.528958	NA
ENSMUSG00000101630	Gm29261	0.32192	1.84418	2.92914	0.629598	0.528958	NA
ENSMUSG00000021403	Serpinb9b	116.402	1.84324	0.280493	6.57143	4.98349e-11	1.46351e-09
ENSMUSG00000106987	Gm42575	4.40196	1.84319	0.666086	2.76719	0.00565423	0.0265516
ENSMUSG00000039934	Gsap	588.323	1.84269	0.334116	5.51513	3.48525e-08	6.47099e-07
ENSMUSG00000022935	Grik1	18.545	1.84232	0.465369	3.95884	7.53154e-05	0.000661808
ENSMUSG00000021359	Tfap2a	0.890259	1.84107	1.40021	1.31486	0.188558	0.388219
ENSMUSG00000026475	Rgs16	164.444	1.84053	0.234054	7.86372	3.72894e-15	1.85477e-13
ENSMUSG00000037447	Arid5a	526.972	1.84019	0.147529	12.4734	1.04336e-35	3.70103e-33
ENSMUSG00000027313	Chac1	50.3504	1.83871	0.336363	5.46645	4.59133e-08	8.34082e-07
ENSMUSG00000097804	Gm16685	16.0754	1.83845	0.784524	2.34339	0.0191092	0.0711263
ENSMUSG00000039956	Mrap	0.892826	1.83751	1.39869	1.31374	0.188934	0.388764
ENSMUSG00000084009	Rhox7-ps1	0.886807	1.83683	1.39962	1.31238	0.189392	0.38943
ENSMUSG00000104275	Gm37867	0.319794	1.83596	2.93251	0.62607	0.531269	NA
ENSMUSG00000106441	Gm42921	0.319794	1.83596	2.93251	0.62607	0.531269	NA
ENSMUSG00000108254	Gm43908	0.319794	1.83596	2.93251	0.62607	0.531269	NA
ENSMUSG00000111655	4930434F21Rik	0.319794	1.83596	2.93251	0.62607	0.531269	NA
ENSMUSG00000111710	Gm47145	0.319794	1.83596	2.93251	0.62607	0.531269	NA
ENSMUSG00000082587	Gm12129	0.319794	1.83596	2.93251	0.62607	0.531269	NA
ENSMUSG00000091814	Gm8050	0.319794	1.83596	2.93251	0.62607	0.531269	NA
ENSMUSG00000115158	Gm48912	0.319794	1.83596	2.93251	0.62607	0.531269	NA
ENSMUSG00000108126	Gm43909	1.79848	1.83578	1.09424	1.67768	0.09341	0.237974
ENSMUSG00000018920	Cxcl16	558.027	1.83466	0.343516	5.34082	9.25267e-08	1.57476e-06
ENSMUSG00000055748	Gsdmc4	0.882192	1.83377	1.54315	1.18833	0.234704	0.447736
ENSMUSG00000104333	Gm10253	0.320857	1.83314	2.3299	0.78679	0.431405	NA
ENSMUSG00000084032	Gm12991	0.320857	1.83314	2.3299	0.78679	0.431405	NA
ENSMUSG00000087045	4930515B02Rik	0.320857	1.83314	2.3299	0.78679	0.431405	NA
ENSMUSG00000048582	Gja3	0.320857	1.83314	2.3299	0.78679	0.431405	NA
ENSMUSG00000098091	Gm16470	0.320857	1.83314	2.3299	0.78679	0.431405	NA
ENSMUSG00000096591	Gm13272	0.318695	1.83168	2.93427	0.624238	0.532471	NA
ENSMUSG00000112214	Cyp3a61-ps1	0.318695	1.83168	2.93427	0.624238	0.532471	NA
ENSMUSG00000085585	Gm12223	0.318695	1.83168	2.93427	0.624238	0.532471	NA
ENSMUSG00000093453	Vmn1r-ps146	0.318695	1.83168	2.93427	0.624238	0.532471	NA
ENSMUSG00000097268	Gm26805	0.320308	1.83122	2.33036	0.785812	0.431978	NA
ENSMUSG00000087564	Gm11817	0.320308	1.83122	2.33036	0.785812	0.431978	NA
ENSMUSG00000085351	Gm12472	0.320308	1.83122	2.33036	0.785812	0.431978	NA
ENSMUSG00000106551	Gm1969	0.320308	1.83122	2.33036	0.785812	0.431978	NA
ENSMUSG00000108612	Gm44634	0.320308	1.83122	2.33036	0.785812	0.431978	NA
ENSMUSG00000099804	Gm28497	2.63608	1.83091	0.942287	1.94305	0.0520096	0.154176
ENSMUSG00000107335	Gm43372	1.30426	1.83044	1.13874	1.60743	0.107959	0.264925
ENSMUSG00000090016	Gm16578	2.20944	1.82969	1.00305	1.82413	0.0681325	0.188966
ENSMUSG00000113541	Gm48409	1.33623	1.82836	1.23135	1.48484	0.137586	0.313173
ENSMUSG00000030254	Rad18	710.991	1.82767	0.228406	8.00187	1.22545e-15	6.37781e-14
ENSMUSG00000027562	Car2	559.641	1.82762	0.209017	8.74391	2.25184e-18	1.62754e-16
ENSMUSG00000082334	Gm13244	0.319244	1.82753	2.33126	0.783922	0.433086	NA
ENSMUSG00000088542	Gm24962	0.319244	1.82753	2.33126	0.783922	0.433086	NA
ENSMUSG00000115664	Gm32913	0.319244	1.82753	2.33126	0.783922	0.433086	NA
ENSMUSG00000116536	AC132099.1	0.319244	1.82753	2.33126	0.783922	0.433086	NA
ENSMUSG00000053624	Gykl1	0.319244	1.82753	2.33126	0.783922	0.433086	NA
ENSMUSG00000058147	Xlr3c	0.319244	1.82753	2.33126	0.783922	0.433086	NA
ENSMUSG00000040663	Clcf1	191.368	1.82712	0.22743	8.03377	9.45253e-16	4.99668e-14
ENSMUSG00000070645	Ren1	24.3007	1.82711	0.334032	5.46988	4.50348e-08	8.18673e-07
ENSMUSG00000062826	Ces2f	0.883533	1.82623	1.73494	1.05262	0.292516	0.514507
ENSMUSG00000032484	Ngp	4.82002	1.82275	0.951975	1.9147	0.0555306	0.162141
ENSMUSG00000102825	Gm36990	1.32539	1.82256	1.25019	1.45783	0.144888	0.324071
ENSMUSG00000040653	Ppp1r14c	11.8086	1.82214	0.467895	3.89434	9.84664e-05	0.000835291
ENSMUSG00000084566	Gm26477	1.39584	1.82133	1.23767	1.47158	0.141135	0.318326
ENSMUSG00000032661	Oas3	264.188	1.82122	0.651919	2.79363	0.00521204	0.0248825
ENSMUSG00000102191	Gm36569	0.869648	1.82111	1.44135	1.26348	0.206418	0.412088
ENSMUSG00000104979	Mir6994	0.872179	1.82077	1.36935	1.32966	0.18363	0.381642
ENSMUSG00000090191	9230105E05Rik	9.03049	1.82066	0.54085	3.36629	0.000761868	0.0048869
ENSMUSG00000086277	4930558K02Rik	0.885716	1.82035	1.50181	1.2121	0.225473	0.436739
ENSMUSG00000085448	Gm13963	3.93197	1.81949	0.680463	2.6739	0.00749752	0.0335869
ENSMUSG00000100033	Gm8337	0.316856	1.81903	2.33328	0.779601	0.435626	NA
ENSMUSG00000085015	Gm14424	0.316856	1.81903	2.33328	0.779601	0.435626	NA
ENSMUSG00000108875	Gm45064	0.316856	1.81903	2.33328	0.779601	0.435626	NA
ENSMUSG00000030680	Pagr1a	0.316856	1.81903	2.33328	0.779601	0.435626	NA
ENSMUSG00000103552	Gm38217	0.316856	1.81903	2.33328	0.779601	0.435626	NA
ENSMUSG00000082234	Gm16221	0.316856	1.81903	2.33328	0.779601	0.435626	NA
ENSMUSG00000113937	Rpl21-ps2	0.316856	1.81903	2.33328	0.779601	0.435626	NA
ENSMUSG00000113942	Gm18632	0.316856	1.81903	2.33328	0.779601	0.435626	NA
ENSMUSG00000117358	AC154442.1	7.01225	1.81834	0.531848	3.41892	0.000628707	0.00414003
ENSMUSG00000025934	Gsta3	47.4008	1.8183	0.235837	7.71	1.25818e-14	5.92317e-13
ENSMUSG00000113163	Olfr335-ps	0.919596	1.81806	2.05538	0.884535	0.376407	0.600767
ENSMUSG00000044737	Klk14	0.876616	1.81787	1.71742	1.05849	0.289832	0.511201
ENSMUSG00000071679	Rtl4	1.32733	1.81607	1.13749	1.59655	0.110365	0.268969
ENSMUSG00000064606	Gm25899	0.315792	1.81531	2.33421	0.777699	0.436746	NA
ENSMUSG00000089830	Gm15749	0.315792	1.81531	2.33421	0.777699	0.436746	NA
ENSMUSG00000109891	Gm45339	0.315792	1.81531	2.33421	0.777699	0.436746	NA
ENSMUSG00000077400	Gm25417	0.315792	1.81531	2.33421	0.777699	0.436746	NA
ENSMUSG00000062204	Olfr1373	0.315792	1.81531	2.33421	0.777699	0.436746	NA
ENSMUSG00000086910	Gm15755	0.315792	1.81531	2.33421	0.777699	0.436746	NA
ENSMUSG00000060459	Kng2	262.904	1.81502	0.278545	6.51606	7.21764e-11	2.06123e-09
ENSMUSG00000026228	Htr2b	258.632	1.81452	0.161784	11.2157	3.41573e-29	6.62479e-27
ENSMUSG00000089092	Gm25654	0.909431	1.81449	1.45791	1.24459	0.213284	0.42164
ENSMUSG00000031530	Dusp4	34.2275	1.81362	0.381566	4.75309	2.00335e-06	2.58909e-05
ENSMUSG00000086132	Gm13631	0.315243	1.81339	2.33469	0.776713	0.437328	NA
ENSMUSG00000082329	Gm14287	0.315243	1.81339	2.33469	0.776713	0.437328	NA
ENSMUSG00000089590	Gm26160	0.315243	1.81339	2.33469	0.776713	0.437328	NA
ENSMUSG00000069971	4933402J07Rik	0.315243	1.81339	2.33469	0.776713	0.437328	NA
ENSMUSG00000095958	Trav12-3	0.315243	1.81339	2.33469	0.776713	0.437328	NA
ENSMUSG00000115085	Gm9198	0.315243	1.81339	2.33469	0.776713	0.437328	NA
ENSMUSG00000041782	Lad1	1247.15	1.81335	0.373732	4.85201	1.22216e-06	1.66069e-05
ENSMUSG00000034607	Pof1b	137.004	1.81306	0.319692	5.67127	1.41745e-08	2.84534e-07
ENSMUSG00000022265	Ank	544.273	1.81274	0.124768	14.5289	7.9538e-48	5.49812e-45
ENSMUSG00000099609	Gm29008	7.80151	1.81231	0.522637	3.46762	0.00052508	0.00354135
ENSMUSG00000051805	A530095I07Rik	10.3266	1.81214	0.4341	4.17447	2.98675e-05	0.000290371
ENSMUSG00000117466	AC124316.1	14.1248	1.81209	0.68521	2.64458	0.00817917	0.0360947
ENSMUSG00000035246	Pcyt1b	84.1335	1.81132	0.249023	7.2737	3.4977e-13	1.37056e-11
ENSMUSG00000072962	Gm16401	33.6096	1.80836	0.491878	3.67643	0.000236518	0.00177316
ENSMUSG00000114196	Gm47547	58.8906	1.80782	0.248652	7.27048	3.58205e-13	1.40157e-11
ENSMUSG00000072592	Gm10373	0.862207	1.80761	1.55608	1.16164	0.24538	0.461054
ENSMUSG00000117442	AC091309.4	8.1685	1.8073	0.477123	3.78791	0.000151921	0.00121424
ENSMUSG00000042828	Trim72	2.58534	1.80638	0.900206	2.00663	0.0447892	0.137228
ENSMUSG00000030851	Ldhc	1.29821	1.80518	1.13513	1.59029	0.11177	0.271021
ENSMUSG00000096938	9530052E02Rik	0.870117	1.80496	1.53694	1.17438	0.240242	0.454237
ENSMUSG00000097495	Gm26651	8.76793	1.80488	0.462179	3.90515	9.41683e-05	0.00080515
ENSMUSG00000107952	Gm6352	0.311791	1.80441	2.94554	0.612591	0.540147	NA
ENSMUSG00000093473	Gm20620	0.311791	1.80441	2.94554	0.612591	0.540147	NA
ENSMUSG00000096895	Gm25245	0.311791	1.80441	2.94554	0.612591	0.540147	NA
ENSMUSG00000043760	Pkhd1	739.232	1.8029	0.546117	3.3013	0.00096237	0.00599058
ENSMUSG00000089914	4930486I03Rik	4.29302	1.80013	0.651904	2.76134	0.00575647	0.0269659
ENSMUSG00000064330	Pde6h	5.32048	1.8	0.751691	2.3946	0.0166384	0.0640769
ENSMUSG00000113788	Gm47904	42.7988	1.79938	0.406185	4.42996	9.42522e-06	0.000103543
ENSMUSG00000095541	Gm24617	0.8615	1.79777	1.55321	1.15745	0.247087	0.463222
ENSMUSG00000084878	Lrrc8dos	3.44098	1.7976	0.76513	2.3494	0.0188038	0.0703581
ENSMUSG00000026874	Hc	56.7309	1.79733	0.563502	3.18958	0.00142481	0.00838675
ENSMUSG00000102224	4930447F24Rik	4.8978	1.79679	0.873292	2.05749	0.0396388	0.124621
ENSMUSG00000089931	Gm8459	1.25211	1.79605	1.19906	1.49788	0.134166	0.307806
ENSMUSG00000091575	2010016I18Rik	53.9804	1.79538	0.383113	4.68631	2.78178e-06	3.46713e-05
ENSMUSG00000076666	Ighv14-4	0.864996	1.79523	2.07282	0.866083	0.386445	0.610016
ENSMUSG00000065822	Snord15a	15.9254	1.79461	0.564219	3.18069	0.00146922	0.00860127
ENSMUSG00000082093	Gm15928	1.28181	1.79447	1.24332	1.44329	0.148939	0.330173
ENSMUSG00000013523	Bcas1	26.971	1.79435	0.430832	4.16485	3.11554e-05	0.000301694
ENSMUSG00000080972	Gm16061	6.5667	1.79414	0.528558	3.3944	0.000687783	0.00447657
ENSMUSG00000021062	Rab15	148.546	1.79384	0.23783	7.5425	4.61061e-14	2.01455e-12
ENSMUSG00000107723	Gm43964	2.14438	1.79344	1.01951	1.75912	0.0785574	0.209819
ENSMUSG00000112014	Gm48435	1.28269	1.79278	1.3446	1.33332	0.182428	0.379743
ENSMUSG00000024521	Pmaip1	150.374	1.79172	0.256053	6.99745	2.60658e-12	9.14985e-11
ENSMUSG00000040055	Gjb6	3.07161	1.79127	1.21102	1.47914	0.139104	0.315347
ENSMUSG00000023885	Thbs2	2244.33	1.79044	0.343822	5.20745	1.91449e-07	3.06671e-06
ENSMUSG00000081165	Gm11783	1.30558	1.79	1.15964	1.54359	0.122689	0.28963
ENSMUSG00000026644	Acbd7	0.875615	1.78944	1.76523	1.01371	0.310721	0.53423
ENSMUSG00000083320	Gm13935	0.911733	1.78894	1.86375	0.959863	0.337124	0.561159
ENSMUSG00000088246	Gm25911	1.37292	1.78881	1.77415	1.00827	0.313326	0.536984
ENSMUSG00000021118	Plek2	27.0931	1.7871	0.351507	5.08411	3.69359e-07	5.59728e-06
ENSMUSG00000041710	Trpc5	1.73943	1.78689	1.01262	1.76463	0.0776258	0.208147
ENSMUSG00000103482	Gm37999	1.70217	1.78623	1.36367	1.30987	0.190241	0.390549
ENSMUSG00000091091	Kcnmb3	3.43113	1.78623	0.74333	2.403	0.016261	0.0629584
ENSMUSG00000053113	Socs3	448.802	1.78412	0.378888	4.70884	2.49136e-06	3.14836e-05
ENSMUSG00000115754	Gm48972	2.12445	1.78393	1.38538	1.28768	0.197858	0.400966
ENSMUSG00000021636	Marveld2	113.596	1.78325	0.331098	5.38586	7.2099e-08	1.25159e-06
ENSMUSG00000111690	Gm48720	0.876229	1.78314	1.7877	0.997451	0.318546	0.542254
ENSMUSG00000103527	Gm37261	1.71756	1.78035	1.15373	1.54312	0.122801	0.289793
ENSMUSG00000037279	Ovol2	26.0377	1.77998	0.439851	4.04677	5.19281e-05	0.000475843
ENSMUSG00000097369	Gm26545	1.73403	1.77918	1.02351	1.73831	0.0821567	0.216616
ENSMUSG00000034394	Lif	65.0635	1.77835	0.354424	5.01757	5.23287e-07	7.64209e-06
ENSMUSG00000042622	Maff	171.616	1.77776	0.144327	12.3176	7.28576e-35	2.36647e-32
ENSMUSG00000091366	Gm17040	1.27026	1.77584	1.26464	1.40422	0.160252	0.347119
ENSMUSG00000103108	Rncr4	1.71198	1.77567	0.996471	1.78196	0.0747552	0.202362
ENSMUSG00000076672	Ighv3-6	13.3512	1.77457	0.776338	2.28582	0.0222645	0.0801054
ENSMUSG00000049382	Krt8	3883.06	1.77331	0.36423	4.86867	1.12352e-06	1.53985e-05
ENSMUSG00000090533	Gm8214	0.55864	1.77148	2.19166	0.808281	0.418929	NA
ENSMUSG00000009356	Lpo	19.0527	1.77119	0.427701	4.14118	3.4553e-05	0.000330911
ENSMUSG00000092390	Gm20541	5.88985	1.76704	0.612666	2.88419	0.00392425	0.0196424
ENSMUSG00000083075	Gm11980	1.70518	1.76573	1.35241	1.30562	0.191682	0.392402
ENSMUSG00000024732	Ccdc86	321.227	1.76549	0.132975	13.2768	3.1548e-40	1.49211e-37
ENSMUSG00000066760	Psg16	38.5883	1.76511	0.591703	2.98311	0.00285338	0.0151307
ENSMUSG00000024727	Trpm6	1042.96	1.76508	0.361751	4.87926	1.06487e-06	1.46394e-05
ENSMUSG00000032845	Alpk2	4.25375	1.76407	0.648466	2.72038	0.00652067	0.0299584
ENSMUSG00000026343	Gpr39	26.8147	1.76373	0.386421	4.56426	5.01252e-06	5.85243e-05
ENSMUSG00000106287	Gm43585	14.8345	1.76298	0.367216	4.80093	1.57928e-06	2.08501e-05
ENSMUSG00000107927	Gm44090	2.87624	1.76283	0.978645	1.80129	0.0716569	0.196122
ENSMUSG00000020607	Fam84a	83.0933	1.76256	0.261317	6.74491	1.53123e-11	4.79447e-10
ENSMUSG00000059042	Klk1b9	1.70014	1.76175	1.0073	1.74898	0.0802947	0.213058
ENSMUSG00000083914	Rps18-ps1	0.299547	1.7615	3.14076	0.560852	0.574898	NA
ENSMUSG00000108258	Gm43913	2.48081	1.76064	0.823283	2.13856	0.0324713	0.106952
ENSMUSG00000034837	Gnat1	1.3164	1.7605	1.29456	1.35991	0.173857	0.366602
ENSMUSG00000104794	Mir28c	8.53162	1.76003	0.457971	3.8431	0.000121491	0.00100192
ENSMUSG00000027859	Ngf	123.265	1.75931	0.152301	11.5515	7.25279e-31	1.58966e-28
ENSMUSG00000090257	Gm4524	15.274	1.75887	0.396315	4.43807	9.0771e-06	9.9963e-05
ENSMUSG00000099954	Gm28112	32.2048	1.75886	0.326953	5.37956	7.46682e-08	1.29286e-06
ENSMUSG00000089831	Gm15508	0.298484	1.75828	2.9708	0.591853	0.553949	NA
ENSMUSG00000072381	Gm10355	0.298484	1.75828	2.9708	0.591853	0.553949	NA
ENSMUSG00000087070	Gm12505	0.298484	1.75828	2.9708	0.591853	0.553949	NA
ENSMUSG00000103119	Gm37583	0.298484	1.75828	2.9708	0.591853	0.553949	NA
ENSMUSG00000054986	Sec14l3	0.298484	1.75828	2.9708	0.591853	0.553949	NA
ENSMUSG00000114032	Gm2139	0.298484	1.75828	2.9708	0.591853	0.553949	NA
ENSMUSG00000113973	A030014E15Rik	0.297934	1.75635	2.97188	0.590987	0.554529	NA
ENSMUSG00000082185	Gm12428	0.297934	1.75635	2.97188	0.590987	0.554529	NA
ENSMUSG00000112764	Gm48158	0.297934	1.75635	2.97188	0.590987	0.554529	NA
ENSMUSG00000097407	4933408J17Rik	0.297934	1.75635	2.97188	0.590987	0.554529	NA
ENSMUSG00000046886	Zfp474	0.297934	1.75635	2.97188	0.590987	0.554529	NA
ENSMUSG00000081975	Gm12482	0.296871	1.75626	2.3543	0.745981	0.455679	NA
ENSMUSG00000036749	Pramel5	0.296871	1.75626	2.3543	0.745981	0.455679	NA
ENSMUSG00000096265	4930467E23Rik	0.296871	1.75626	2.3543	0.745981	0.455679	NA
ENSMUSG00000111613	Gm4977	0.296871	1.75626	2.3543	0.745981	0.455679	NA
ENSMUSG00000058883	Zfp708	0.296871	1.75626	2.3543	0.745981	0.455679	NA
ENSMUSG00000102363	Gm32999	1.66646	1.75616	1.12023	1.56768	0.116956	0.27987
ENSMUSG00000111377	Gm40634	3.81818	1.75566	0.76115	2.30658	0.021078	0.0768414
ENSMUSG00000021469	Msx2	13.9947	1.7554	0.433702	4.04747	5.17746e-05	0.000474597
ENSMUSG00000085569	Gm12602	0.29742	1.75455	2.9729	0.590181	0.55507	NA
ENSMUSG00000082207	Gm12998	0.29742	1.75455	2.9729	0.590181	0.55507	NA
ENSMUSG00000083949	Gm12897	0.29742	1.75455	2.9729	0.590181	0.55507	NA
ENSMUSG00000074034	Gm5921	0.29742	1.75455	2.9729	0.590181	0.55507	NA
ENSMUSG00000112521	Gm29884	0.29742	1.75455	2.9729	0.590181	0.55507	NA
ENSMUSG00000065498	Mir379	0.29742	1.75455	2.9729	0.590181	0.55507	NA
ENSMUSG00000065673	Gm24258	0.876905	1.75413	1.80889	0.969727	0.332183	0.556127
ENSMUSG00000056501	Cebpb	112.336	1.7539	0.298018	5.88522	3.97529e-09	8.72008e-08
ENSMUSG00000078497	Zfp978	1.28108	1.75316	1.33363	1.31458	0.18865	0.38832
ENSMUSG00000055926	Gm14137	79.5075	1.7529	0.225686	7.76696	8.03911e-15	3.87012e-13
ENSMUSG00000112825	Gm9118	3.34413	1.75268	0.776621	2.25681	0.0240202	0.0849148
ENSMUSG00000044976	Wdr72	228.329	1.7526	0.269237	6.50951	7.53975e-11	2.1464e-09
ENSMUSG00000026011	Ctla4	13.1123	1.7523	0.863159	2.0301	0.0423466	0.131448
ENSMUSG00000028655	Mfsd2a	108.795	1.75166	0.268247	6.53003	6.57558e-11	1.89392e-09
ENSMUSG00000103907	Gm37498	3.72141	1.75157	0.893871	1.95953	0.0500504	0.149624
ENSMUSG00000105000	Gm43616	0.296321	1.75067	2.97508	0.588446	0.556233	NA
ENSMUSG00000086021	Gm15767	0.296321	1.75067	2.97508	0.588446	0.556233	NA
ENSMUSG00000098958	Mir6933	0.296321	1.75067	2.97508	0.588446	0.556233	NA
ENSMUSG00000077104	Gm25263	0.296357	1.75015	3.14145	0.557114	0.577449	NA
ENSMUSG00000107771	Gm8956	0.296357	1.75015	3.14145	0.557114	0.577449	NA
ENSMUSG00000086828	Gm15579	0.296357	1.75015	3.14145	0.557114	0.577449	NA
ENSMUSG00000112120	Gm32255	0.296357	1.75015	3.14145	0.557114	0.577449	NA
ENSMUSG00000096156	Gm9242	0.296357	1.75015	3.14145	0.557114	0.577449	NA
ENSMUSG00000023945	Slc5a7	0.296357	1.75015	3.14145	0.557114	0.577449	NA
ENSMUSG00000085114	1600025M17Rik	1.68432	1.74983	1.35966	1.28696	0.198107	0.40123
ENSMUSG00000017897	Eya2	306.76	1.74967	0.271243	6.45059	1.11418e-10	3.08391e-09
ENSMUSG00000101625	Gm29371	0.295807	1.74887	2.9761	0.587637	0.556776	NA
ENSMUSG00000083218	Gm16425	0.295807	1.74887	2.9761	0.587637	0.556776	NA
ENSMUSG00000047197	Gjd3	0.295807	1.74887	2.9761	0.587637	0.556776	NA
ENSMUSG00000113009	3732407C23Rik	0.295807	1.74887	2.9761	0.587637	0.556776	NA
ENSMUSG00000104438	Gm37427	0.295807	1.74887	2.9761	0.587637	0.556776	NA
ENSMUSG00000043050	Tnp2	0.295807	1.74887	2.9761	0.587637	0.556776	NA
ENSMUSG00000112029	Gm33337	3.843	1.74731	0.746814	2.33969	0.0193	0.0716677
ENSMUSG00000047728	BC025446	11.5818	1.74723	0.68297	2.55828	0.0105192	0.0444286
ENSMUSG00000095574	Trbv12-1	0.295258	1.74692	2.9772	0.586767	0.55736	NA
ENSMUSG00000102384	Gm38143	0.295258	1.74692	2.9772	0.586767	0.55736	NA
ENSMUSG00000092693	Gm22923	0.295258	1.74692	2.9772	0.586767	0.55736	NA
ENSMUSG00000022296	Baalc	7.64633	1.74692	0.582409	2.99947	0.00270448	0.0144405
ENSMUSG00000092524	Olfr756-ps1	3.26717	1.74539	0.90798	1.92228	0.0545703	0.159978
ENSMUSG00000086905	Gm13716	2.9265	1.7453	0.816631	2.1372	0.0325817	0.107193
ENSMUSG00000089870	Gm15562	22.1164	1.74517	0.447848	3.89678	9.74781e-05	0.000827689
ENSMUSG00000035226	Rims4	0.293419	1.74512	2.35827	0.740001	0.4593	NA
ENSMUSG00000086067	Gm16183	0.293419	1.74512	2.35827	0.740001	0.4593	NA
ENSMUSG00000110332	Gm19935	0.293419	1.74512	2.35827	0.740001	0.4593	NA
ENSMUSG00000110216	Gm36325	0.293419	1.74512	2.35827	0.740001	0.4593	NA
ENSMUSG00000043289	Mei4	0.293419	1.74512	2.35827	0.740001	0.4593	NA
ENSMUSG00000063216	Olfr1351	0.293419	1.74512	2.35827	0.740001	0.4593	NA
ENSMUSG00000105252	Gm42753	0.294708	1.74423	3.14181	0.555168	0.57878	NA
ENSMUSG00000112422	Gm31938	0.294708	1.74423	3.14181	0.555168	0.57878	NA
ENSMUSG00000098799	Trgj4	0.294708	1.74423	3.14181	0.555168	0.57878	NA
ENSMUSG00000082588	Gm15443	0.294482	1.74407	2.97873	0.58551	0.558205	NA
ENSMUSG00000107702	Gm44140	0.294482	1.74407	2.97873	0.58551	0.558205	NA
ENSMUSG00000061486	Gm5161	0.294482	1.74407	2.97873	0.58551	0.558205	NA
ENSMUSG00000105111	Gm43310	0.294482	1.74407	2.97873	0.58551	0.558205	NA
ENSMUSG00000079710	Gm3448	0.294482	1.74407	2.97873	0.58551	0.558205	NA
ENSMUSG00000091410	Gm17150	0.294482	1.74407	2.97873	0.58551	0.558205	NA
ENSMUSG00000037580	Gch1	183.929	1.74338	0.253	6.89082	5.54725e-12	1.85544e-10
ENSMUSG00000082381	Gm12928	0.292869	1.74336	2.35892	0.739051	0.459876	NA
ENSMUSG00000105089	Gm43717	0.292869	1.74336	2.35892	0.739051	0.459876	NA
ENSMUSG00000109506	Gm44724	0.292869	1.74336	2.35892	0.739051	0.459876	NA
ENSMUSG00000045048	Gm9795	0.292869	1.74336	2.35892	0.739051	0.459876	NA
ENSMUSG00000113606	Gm47441	0.292869	1.74336	2.35892	0.739051	0.459876	NA
ENSMUSG00000105951	Gm44491	0.292869	1.74336	2.35892	0.739051	0.459876	NA
ENSMUSG00000079794	AC125149.2	0.292869	1.74336	2.35892	0.739051	0.459876	NA
ENSMUSG00000041202	Pla2g2d	10.8719	1.74131	0.417591	4.1699	3.04737e-05	0.000295944
ENSMUSG00000072679	D6Ertd474e	1.72981	1.74049	1.06649	1.63198	0.102685	0.255067
ENSMUSG00000082028	Gm1826	0.291806	1.73996	2.36018	0.737215	0.460991	NA
ENSMUSG00000106116	Gm18830	0.291806	1.73996	2.36018	0.737215	0.460991	NA
ENSMUSG00000115482	Vmn1r36	0.291806	1.73996	2.36018	0.737215	0.460991	NA
ENSMUSG00000086428	Gm15199	0.291806	1.73996	2.36018	0.737215	0.460991	NA
ENSMUSG00000025389	Mip	0.291806	1.73996	2.36018	0.737215	0.460991	NA
ENSMUSG00000090576	Gm17055	3.36765	1.73937	0.722463	2.40756	0.0160597	0.0623045
ENSMUSG00000090558	Gm17202	4.16533	1.73801	0.74958	2.31865	0.0204141	0.0747748
ENSMUSG00000087878	Gm26105	0.292355	1.73653	2.98304	0.582137	0.560475	NA
ENSMUSG00000108942	Gm44660	0.292355	1.73653	2.98304	0.582137	0.560475	NA
ENSMUSG00000108947	Olfr1422-ps1	0.292355	1.73653	2.98304	0.582137	0.560475	NA
ENSMUSG00000099590	C330022C24Rik	4.56045	1.73644	0.641788	2.70562	0.00681771	0.0310838
ENSMUSG00000085454	Grip1os3	3.67829	1.73623	0.823384	2.10865	0.0349749	0.113396
ENSMUSG00000054161	Fam83e	19.611	1.73617	0.411137	4.22284	2.41246e-05	0.000239549
ENSMUSG00000029082	Bst1	247.607	1.73469	0.45542	3.809	0.00013953	0.00112657
ENSMUSG00000024697	Gna14	38.524	1.73463	0.305004	5.68724	1.29107e-08	2.60887e-07
ENSMUSG00000029121	Crmp1	7.35396	1.73375	0.593918	2.91917	0.00350962	0.0179639
ENSMUSG00000102871	Gm37143	0.291256	1.73261	2.98528	0.580385	0.561655	NA
ENSMUSG00000089898	Gm14199	0.291256	1.73261	2.98528	0.580385	0.561655	NA
ENSMUSG00000103196	Gm37641	0.291256	1.73261	2.98528	0.580385	0.561655	NA
ENSMUSG00000081357	Xlr4e-ps	0.291256	1.73261	2.98528	0.580385	0.561655	NA
ENSMUSG00000086115	Gm15733	1.23684	1.73252	1.27788	1.35578	0.175169	0.368591
ENSMUSG00000101214	Gm28403	3.26725	1.73165	0.760713	2.27636	0.0228247	0.0816198
ENSMUSG00000097569	Gm26640	3.74219	1.73125	0.835384	2.0724	0.0382282	0.121232
ENSMUSG00000058794	Nfe2	9.71163	1.73013	0.675417	2.56157	0.0104199	0.0440851
ENSMUSG00000024552	Slc14a2	29.7573	1.72928	1.05653	1.63676	0.101681	0.253187
ENSMUSG00000005251	Ripk4	105.803	1.72891	0.275735	6.27019	3.60615e-10	9.20627e-09
ENSMUSG00000074121	Ntf5	16.7014	1.72735	0.363827	4.74774	2.05707e-06	2.64835e-05
ENSMUSG00000107363	Gm43373	6.62752	1.72661	0.609387	2.83336	0.00460619	0.0224716
ENSMUSG00000037686	Aspg	79.9798	1.726	0.467642	3.69086	0.000223497	0.00169439
ENSMUSG00000086755	Gm11216	0.289417	1.72594	2.98905	0.57742	0.563656	NA
ENSMUSG00000106932	4930487D11Rik	0.289417	1.72594	2.98905	0.57742	0.563656	NA
ENSMUSG00000050189	Etos1	0.289417	1.72594	2.98905	0.57742	0.563656	NA
ENSMUSG00000110507	8030455M16Rik	0.289417	1.72594	2.98905	0.57742	0.563656	NA
ENSMUSG00000006764	Tph2	0.289417	1.72594	2.98905	0.57742	0.563656	NA
ENSMUSG00000114472	Gm38397	0.289417	1.72594	2.98905	0.57742	0.563656	NA
ENSMUSG00000112693	Gm5512	0.289417	1.72594	2.98905	0.57742	0.563656	NA
ENSMUSG00000055360	Prl2c5	11.6579	1.7239	0.472583	3.64783	0.000264467	0.00195443
ENSMUSG00000103015	Gm37549	1.26695	1.72238	1.3279	1.29707	0.194608	0.396645
ENSMUSG00000104464	Gm18698	0.288354	1.72213	2.99127	0.575718	0.564806	NA
ENSMUSG00000082682	Gm15349	0.288354	1.72213	2.99127	0.575718	0.564806	NA
ENSMUSG00000111258	Gm34397	0.288354	1.72213	2.99127	0.575718	0.564806	NA
ENSMUSG00000112351	Gm48326	0.288354	1.72213	2.99127	0.575718	0.564806	NA
ENSMUSG00000039098	Gm9767	0.288354	1.72213	2.99127	0.575718	0.564806	NA
ENSMUSG00000113494	Gm48102	0.288354	1.72213	2.99127	0.575718	0.564806	NA
ENSMUSG00000023931	Efhb	147.099	1.72135	0.258914	6.64835	2.96394e-11	8.99828e-10
ENSMUSG00000099241	Gm18852	30.3826	1.72113	0.535388	3.21474	0.00130564	0.00780286
ENSMUSG00000025929	Il17a	0.287804	1.72015	2.99241	0.574836	0.565402	NA
ENSMUSG00000099563	Gm19125	0.287804	1.72015	2.99241	0.574836	0.565402	NA
ENSMUSG00000100170	Gm28942	0.287804	1.72015	2.99241	0.574836	0.565402	NA
ENSMUSG00000105634	Gm43367	0.287804	1.72015	2.99241	0.574836	0.565402	NA
ENSMUSG00000097152	Gm26515	0.287804	1.72015	2.99241	0.574836	0.565402	NA
ENSMUSG00000029706	Pax4	0.287804	1.72015	2.99241	0.574836	0.565402	NA
ENSMUSG00000098854	Gm5118	0.287804	1.72015	2.99241	0.574836	0.565402	NA
ENSMUSG00000076668	Ighv7-4	0.287804	1.72015	2.99241	0.574836	0.565402	NA
ENSMUSG00000050158	Olfr165	0.287804	1.72015	2.99241	0.574836	0.565402	NA
ENSMUSG00000030302	Atp2b2	206.102	1.71778	0.433582	3.96183	7.43779e-05	0.000654423
ENSMUSG00000075224	Lrrc55	22.6396	1.71549	0.557936	3.07471	0.00210705	0.0116929
ENSMUSG00000059040	Eno1b	0.557128	1.71351	2.1341	0.802921	0.42202	NA
ENSMUSG00000029923	Rab19	25.4995	1.71278	0.417459	4.10288	4.08041e-05	0.000385033
ENSMUSG00000021453	Gadd45g	1094.26	1.71235	0.199179	8.59704	8.17973e-18	5.54064e-16
ENSMUSG00000068231	Vmn1r43	21.0151	1.71187	0.500282	3.42181	0.000622057	0.00410326
ENSMUSG00000050844	1700020N01Rik	0.85182	1.71175	1.78985	0.956363	0.338889	0.562707
ENSMUSG00000117079	AC154187.1	1.66261	1.71114	1.15496	1.48157	0.138456	0.314503
ENSMUSG00000068806	Olfr1259	7.32	1.71038	0.659583	2.59313	0.00951073	0.0409846
ENSMUSG00000084195	Gm15372	9.84022	1.70931	0.526579	3.24606	0.00117016	0.00710661
ENSMUSG00000081255	Gm5380	0.530802	1.70854	2.15588	0.792503	0.428067	NA
ENSMUSG00000093740	Gm18417	1.2005	1.7073	1.24909	1.36683	0.171678	0.363401
ENSMUSG00000028494	Plin2	1790.56	1.70686	0.183502	9.30161	1.38331e-20	1.28596e-18
ENSMUSG00000093063	Gm23152	0.284352	1.7064	3.14415	0.542722	0.587321	NA
ENSMUSG00000074062	Fbxw16	0.284352	1.7064	3.14415	0.542722	0.587321	NA
ENSMUSG00000037124	Trim58	0.284352	1.7064	3.14415	0.542722	0.587321	NA
ENSMUSG00000086481	Gm11707	0.284352	1.7064	3.14415	0.542722	0.587321	NA
ENSMUSG00000114966	Gm18681	0.284352	1.7064	3.14415	0.542722	0.587321	NA
ENSMUSG00000094231	Trav9n-4	0.284352	1.7064	3.14415	0.542722	0.587321	NA
ENSMUSG00000114368	Gm47953	0.284352	1.7064	3.14415	0.542722	0.587321	NA
ENSMUSG00000086898	Itpr3os	0.284352	1.7064	3.14415	0.542722	0.587321	NA
ENSMUSG00000021367	Edn1	237.71	1.70598	0.182389	9.35351	8.47852e-21	8.02009e-19
ENSMUSG00000104691	Gm43021	0.529703	1.70562	2.1561	0.791069	0.428904	NA
ENSMUSG00000112819	Gm46332	0.853097	1.70163	1.56988	1.08392	0.2784	0.498928
ENSMUSG00000095130	Ighv1-39	2.39992	1.70074	1.23384	1.37842	0.168075	0.35791
ENSMUSG00000102650	Gm19863	15.9223	1.70054	0.513351	3.31263	0.000924244	0.00577979
ENSMUSG00000046610	Oacyl	4.06831	1.69969	0.689442	2.46531	0.0136894	0.0548288
ENSMUSG00000046317	BC107364	3.29992	1.69949	0.914289	1.85881	0.0630545	0.178635
ENSMUSG00000105502	Gm42536	6.88788	1.69943	0.526498	3.2278	0.00124744	0.0075033
ENSMUSG00000113632	Gm47446	0.531865	1.69926	1.83736	0.924836	0.355051	NA
ENSMUSG00000099370	Platr10	0.535203	1.69915	1.8352	0.925866	0.354516	NA
ENSMUSG00000044294	Krt84	36.121	1.69815	0.371151	4.57535	4.75421e-06	5.57013e-05
ENSMUSG00000015962	1700016C15Rik	3.64343	1.69734	0.709457	2.39244	0.0167365	0.0643744
ENSMUSG00000106524	Gm42706	0.843998	1.69709	1.57096	1.08029	0.280013	0.500787
ENSMUSG00000117146	CT010491.1	59.7971	1.69581	0.418359	4.05349	5.04587e-05	0.000465066
ENSMUSG00000057195	Ceacam13	1.64465	1.69512	1.23404	1.37364	0.169555	0.360233
ENSMUSG00000087132	A930001C03Rik	3.28181	1.69509	0.743791	2.27899	0.0226676	0.081187
ENSMUSG00000024014	Pim1	1092.85	1.69314	0.147851	11.4516	2.30764e-30	4.86029e-28
ENSMUSG00000051076	Vtcn1	766.31	1.69291	0.19514	8.6754	4.12108e-18	2.86341e-16
ENSMUSG00000076752	Tcrg-C2	4.47021	1.69223	0.881671	1.91934	0.0549409	0.160803
ENSMUSG00000034437	Gm9761	1.21993	1.69204	1.31973	1.28211	0.199805	0.403274
ENSMUSG00000020108	Ddit4	161.419	1.69154	0.164336	10.2932	7.56199e-25	1.02962e-22
ENSMUSG00000097017	Gm26707	1.20823	1.69037	1.2474	1.35511	0.175382	0.368895
ENSMUSG00000105615	Gm31048	0.840995	1.69026	1.45455	1.16205	0.245214	NA
ENSMUSG00000101258	Gm29477	1.99285	1.69001	0.917473	1.84203	0.065471	0.183647
ENSMUSG00000113362	Gm40557	0.537398	1.68937	1.83109	0.922606	0.356212	NA
ENSMUSG00000042353	Frem3	3.96251	1.68856	0.952695	1.7724	0.0763275	0.205504
ENSMUSG00000040026	Saa3	1561.67	1.68758	1.25989	1.33947	0.180419	0.376813
ENSMUSG00000105476	Gm35439	5.69342	1.68751	0.604891	2.78978	0.00527446	0.0251182
ENSMUSG00000081773	Gm8302	1.25917	1.68712	1.27521	1.32301	0.185831	0.384306
ENSMUSG00000022598	Psca	1.80404	1.68703	1.29188	1.30587	0.191598	0.39232
ENSMUSG00000107552	Gm44096	0.530866	1.68702	1.83459	0.919561	0.357802	NA
ENSMUSG00000114488	Gm5802	0.526137	1.68695	2.15394	0.783196	0.433512	NA
ENSMUSG00000101880	Gm29282	0.526864	1.68694	2.15326	0.783434	0.433372	NA
ENSMUSG00000021622	Ckmt2	1.25866	1.68607	1.23871	1.36115	0.173466	0.366123
ENSMUSG00000065398	Mir188	0.526251	1.68583	1.83724	0.917587	0.358835	NA
ENSMUSG00000040938	Slc16a11	63.681	1.68443	0.228592	7.36873	1.7226e-13	6.98341e-12
ENSMUSG00000090293	Gm17034	17.1776	1.68432	0.439855	3.82927	0.000128524	0.00105028
ENSMUSG00000039328	Rnf122	191.672	1.68285	0.145155	11.5935	4.44659e-31	9.90707e-29
ENSMUSG00000113443	Gm48668	2.01816	1.68236	0.912546	1.84359	0.065243	0.183198
ENSMUSG00000102312	Pcdha3	1.21154	1.68221	1.19095	1.41249	0.157805	0.343556
ENSMUSG00000108971	Gm18210	1.60244	1.682	1.07811	1.56015	0.118725	0.282949
ENSMUSG00000110445	Gm45747	1.95485	1.68199	0.994391	1.69148	0.0907455	0.233322
ENSMUSG00000102722	Gm37935	2.86194	1.6815	0.796034	2.11235	0.0346563	0.112609
ENSMUSG00000020905	Usp43	96.3955	1.68111	0.376465	4.46551	7.98774e-06	8.89106e-05
ENSMUSG00000085135	Gm13713	1.52849	1.68058	1.33752	1.25649	0.208937	0.415546
ENSMUSG00000111450	Gm33351	2.46531	1.67984	0.822733	2.04178	0.0411733	0.128412
ENSMUSG00000112880	Gm20337	3.24305	1.67785	0.756639	2.2175	0.0265889	0.0917811
ENSMUSG00000114531	A530065N20Rik	3.57983	1.67775	0.7315	2.29358	0.0218148	0.0788239
ENSMUSG00000098434	2010110E17Rik	1.55528	1.67623	1.22575	1.36751	0.171465	0.363091
ENSMUSG00000050742	Olfr164	2.35063	1.67545	1.2684	1.32092	0.186528	0.385211
ENSMUSG00000078942	Naip6	399.299	1.6748	0.149498	11.2028	3.95118e-29	7.60855e-27
ENSMUSG00000098973	Mir6236	22846	1.67456	0.705916	2.37219	0.0176832	0.0670199
ENSMUSG00000016283	H2-M2	2.0455	1.67417	1.22583	1.36575	0.172019	0.363979
ENSMUSG00000094594	Tpd52-ps	1.59994	1.672	1.01339	1.64991	0.0989618	0.248247
ENSMUSG00000079993	Gm11799	0.832886	1.67117	1.53091	1.09162	0.275	NA
ENSMUSG00000025993	Slc40a1	1262.71	1.67109	0.125285	13.3384	1.3849e-40	6.78828e-38
ENSMUSG00000031089	Slc6a14	121.29	1.67103	0.407183	4.10389	4.06269e-05	0.000383629
ENSMUSG00000070427	Il18bp	344.004	1.66938	0.704332	2.37016	0.0177803	0.0673418
ENSMUSG00000086515	Erich2os	5.60356	1.66869	0.799171	2.08803	0.0367953	0.117908
ENSMUSG00000112556	Gm47339	0.826108	1.66844	1.5671	1.06466	0.287029	NA
ENSMUSG00000015599	Ttbk1	24.9705	1.66841	0.350974	4.75367	1.99758e-06	2.5841e-05
ENSMUSG00000105313	Gm43583	0.823463	1.66634	1.53195	1.08772	0.276717	NA
ENSMUSG00000093675	Gm20618	0.844325	1.66612	1.52622	1.09166	0.274982	0.495108
ENSMUSG00000102037	Bcl2a1a	14.8672	1.6657	0.805985	2.06667	0.0387657	0.122533
ENSMUSG00000117508	AC168050.1	0.842935	1.6648	1.4192	1.17305	0.240774	0.454904
ENSMUSG00000031325	4930519F16Rik	0.842935	1.6648	1.4192	1.17305	0.240774	0.454904
ENSMUSG00000113476	Gm48309	0.846273	1.66476	1.41854	1.17357	0.240566	0.454639
ENSMUSG00000086414	Gm15645	1.22587	1.66431	1.15246	1.44414	0.1487	0.329803
ENSMUSG00000064065	Ipcef1	86.9503	1.66358	0.303161	5.48747	4.07736e-08	7.48274e-07
ENSMUSG00000086313	Gm15940	1.61848	1.66192	1.10129	1.50906	0.131283	0.303229
ENSMUSG00000030650	Tmc5	10.86	1.6607	0.634328	2.61805	0.00884349	0.0385717
ENSMUSG00000083364	Llph-ps2	3.57302	1.66047	0.862464	1.92526	0.0541968	0.15913
ENSMUSG00000076903	Traj26	0.821043	1.66043	1.5661	1.06023	0.289041	NA
ENSMUSG00000042306	S100a14	3.55504	1.65983	0.705615	2.35231	0.018657	0.069974
ENSMUSG00000112682	Gm48874	125.654	1.65961	0.365583	4.53964	5.63502e-06	6.49762e-05
ENSMUSG00000086519	Gm13393	0.827607	1.65944	1.42079	1.16797	0.242819	NA
ENSMUSG00000038026	Kcnj9	1.18321	1.65897	1.18419	1.40094	0.161233	0.34846
ENSMUSG00000105999	Gm2213	0.820817	1.65886	1.53031	1.084	0.278364	NA
ENSMUSG00000037759	Ptger2	48.0351	1.65834	0.322323	5.14495	2.67595e-07	4.16278e-06
ENSMUSG00000113282	Gm20368	0.51462	1.65797	2.19955	0.753776	0.450984	NA
ENSMUSG00000114665	Gm30918	7.55029	1.65787	0.613035	2.70436	0.00684352	0.0311857
ENSMUSG00000111796	Gm47575	23.141	1.65601	0.393565	4.20772	2.57963e-05	0.000254302
ENSMUSG00000048852	Gm12185	56.748	1.65596	0.850138	1.94787	0.0514309	0.152785
ENSMUSG00000077535	Gm22543	1.59021	1.65594	1.00904	1.64111	0.100775	0.251415
ENSMUSG00000085025	Gm13715	0.821593	1.65588	1.42104	1.16526	0.243915	NA
ENSMUSG00000080499	Gm25338	0.822756	1.65561	1.52874	1.08299	0.278813	NA
ENSMUSG00000034987	Hrh2	24.9763	1.65446	0.782854	2.11336	0.0345697	0.11242
ENSMUSG00000089607	Gm22500	0.823205	1.65431	1.35126	1.22427	0.220849	NA
ENSMUSG00000107005	9030607J07Rik	0.827271	1.65427	1.35064	1.22481	0.220647	NA
ENSMUSG00000023159	Psg29	18.8271	1.65399	0.549297	3.01109	0.00260308	0.0139989
ENSMUSG00000037419	Endod1	923.912	1.65397	0.0953785	17.3411	2.30236e-67	4.43352e-64
ENSMUSG00000059434	Gckr	1.99493	1.65376	0.95915	1.72419	0.0846728	0.221599
ENSMUSG00000105550	Gm35585	5.216	1.65282	0.683251	2.41906	0.0155608	0.0607095
ENSMUSG00000025333	Gpr143	1.65438	1.65281	1.53314	1.07805	0.28101	0.501838
ENSMUSG00000025473	Adam8	231.578	1.6526	0.400527	4.12606	3.69039e-05	0.000351427
ENSMUSG00000115550	Gm49225	1.19047	1.65143	1.22926	1.34344	0.179129	0.374788
ENSMUSG00000035385	Ccl2	183.449	1.65139	0.681677	2.42254	0.0154125	0.060218
ENSMUSG00000096632	Igkv9-124	8.51574	1.65071	1.54366	1.06935	NA	NA
ENSMUSG00000070100	Mir362	0.509491	1.6501	1.83821	0.897662	0.369366	NA
ENSMUSG00000086715	B230112J18Rik	0.511431	1.64926	2.20019	0.749602	0.453495	NA
ENSMUSG00000045349	Sh2d5	28.0085	1.64894	0.43931	3.75348	0.000174396	0.00136633
ENSMUSG00000103434	Gm36993	10.7441	1.64871	0.479282	3.43995	0.000581824	0.00387102
ENSMUSG00000053647	Gper1	43.2698	1.64854	0.281386	5.85864	4.66677e-09	1.01298e-07
ENSMUSG00000083836	Ldha-ps2	0.533142	1.64849	1.82215	0.904696	0.365626	NA
ENSMUSG00000081728	Gm14930	0.533142	1.64849	1.82215	0.904696	0.365626	NA
ENSMUSG00000117123	AL805899.1	90.4751	1.64797	0.43879	3.75572	0.000172844	0.00135535
ENSMUSG00000047237	Fbxw21	0.512494	1.64752	1.83546	0.897607	0.369395	NA
ENSMUSG00000021838	Samd4	2661.88	1.64721	0.184154	8.94476	3.72774e-19	2.9471e-17
ENSMUSG00000038298	Pdzk1	8.89635	1.64686	0.524335	3.14084	0.00168462	0.00965881
ENSMUSG00000101024	Gm5692	1.14513	1.64645	1.36025	1.21041	0.226124	0.437621
ENSMUSG00000028591	Pramef12	14.4703	1.64618	0.372678	4.41716	1.00004e-05	0.000108943
ENSMUSG00000117104	AC166164.1	3.66175	1.64589	0.724118	2.27296	0.0230289	0.0822112
ENSMUSG00000096173	Gm3150	1.20115	1.64548	1.20725	1.363	0.172883	0.365292
ENSMUSG00000050957	Insl6	21.928	1.6453	0.573979	2.86648	0.00415062	0.0205919
ENSMUSG00000046108	Il17c	2.72111	1.64529	0.896785	1.83465	0.0665572	0.185901
ENSMUSG00000115467	Vmn1r37	0.507329	1.64495	1.83826	0.89484	0.370873	NA
ENSMUSG00000103951	Gm37269	0.510667	1.64491	1.83597	0.895934	0.370288	NA
ENSMUSG00000085297	Gm11651	0.516864	1.64485	1.83178	0.897948	0.369213	NA
ENSMUSG00000116776	CT010490.2	2.0362	1.64477	1.0786	1.52492	0.12728	0.296725
ENSMUSG00000089840	Gm4491	0.509782	1.64474	2.20052	0.747431	0.454803	NA
ENSMUSG00000036925	Mucl2	0.509782	1.64474	2.20052	0.747431	0.454803	NA
ENSMUSG00000035547	Capn5	1251.7	1.6447	0.273473	6.01414	1.80846e-09	4.14929e-08
ENSMUSG00000116640	AC166114.1	0.529916	1.6446	2.18172	0.753805	0.450966	NA
ENSMUSG00000109384	Gm17931	0.510153	1.6437	1.83598	0.895269	0.370643	NA
ENSMUSG00000065430	Mir26a-2	0.51635	1.64364	1.83179	0.897285	0.369567	NA
ENSMUSG00000092738	Mir5135	0.822174	1.64259	1.61043	1.01997	0.307745	NA
ENSMUSG00000114604	2010203P06Rik	0.530466	1.64219	1.82211	0.901255	0.367453	NA
ENSMUSG00000076448	Mir763	1.58269	1.64217	1.09426	1.50071	0.13343	0.306815
ENSMUSG00000074006	Omp	29.236	1.64201	0.375591	4.37181	1.2322e-05	0.000130916
ENSMUSG00000048988	Elfn1	4.00447	1.64102	0.667047	2.46012	0.0138889	0.0554548
ENSMUSG00000098890	Mir7008	0.508828	1.6404	1.83597	0.893475	0.371603	NA
ENSMUSG00000000411	Tssk3	0.52969	1.64021	1.82207	0.900191	0.368019	NA
ENSMUSG00000063660	Olfr98	1.13717	1.63982	1.56998	1.04449	0.296259	0.518574
ENSMUSG00000091191	Gm17334	20.9653	1.6397	0.685973	2.39033	0.0168333	0.0646637
ENSMUSG00000049866	Arl4c	874.451	1.63952	0.144947	11.3112	1.15558e-29	2.3601e-27
ENSMUSG00000086032	Gm15929	4.00663	1.63944	0.743529	2.20495	0.0274577	0.0940214
ENSMUSG00000026936	Lcn3	0.822323	1.63745	1.60896	1.0177	0.308819	NA
ENSMUSG00000088708	Gm25558	1.63656	1.63642	1.12447	1.45528	0.145593	0.32527
ENSMUSG00000040133	Gpr176	33.5556	1.63638	0.526304	3.1092	0.00187595	0.0106059
ENSMUSG00000092243	Gm7030	2.3217	1.63613	1.3188	1.24062	0.214746	0.423228
ENSMUSG00000031558	Slit2	352.769	1.63597	0.140379	11.6539	2.19224e-31	5.18426e-29
[truncated: 33,719 more rows]

## Sheet: Downregulated genes LAB vs D15
DESeq2 mm10 Labour vs. D15 RNA-seq (n=5)
Significantly downregulated genes in LAB vs D15 (log2FC <= -2, padj < 0.01)
geneid	gene_name	baseMean	log2FoldChange	lfcSE	stat	pvalue	padj
ENSMUSG00000020182	Ddc	16.161	-2.00087	0.538854	-3.71319	0.000204663	0.00156928
ENSMUSG00000043925	Olfr544	10.7999	-2.00194	0.448513	-4.46351	8.06288e-06	8.9636e-05
ENSMUSG00000048148	Nwd1	12.2242	-2.0026	0.445949	-4.49065	7.10067e-06	7.99946e-05
ENSMUSG00000040147	Maob	222.397	-2.00597	0.184664	-10.8628	1.734e-27	2.92168e-25
ENSMUSG00000031239	Itm2a	178.6	-2.01015	0.198029	-10.1508	3.2867e-24	4.19934e-22
ENSMUSG00000105720	Gm42440	27.8475	-2.01418	0.283225	-7.11158	1.14724e-12	4.21944e-11
ENSMUSG00000026414	Tnnt2	128.736	-2.01622	0.414534	-4.86383	1.15136e-06	1.57401e-05
ENSMUSG00000030584	Dpf1	14.4879	-2.02326	0.436985	-4.63005	3.65582e-06	4.40972e-05
ENSMUSG00000024600	Slc27a6	34.0098	-2.0253	0.267912	-7.55957	4.04403e-14	1.79314e-12
ENSMUSG00000028378	Ptgr1	245.497	-2.03302	0.153558	-13.2395	5.18971e-40	2.37135e-37
ENSMUSG00000110187	Gm45496	25.6393	-2.03639	0.318067	-6.40241	1.52944e-10	4.16487e-09
ENSMUSG00000029335	Bmp3	303.14	-2.03793	0.428803	-4.7526	2.00813e-06	2.59401e-05
ENSMUSG00000054850	Smim10l2a	7.86424	-2.04264	0.535793	-3.81238	0.000137636	0.00111461
ENSMUSG00000049148	Plcxd3	25.0885	-2.0482	0.398557	-5.13905	2.76125e-07	4.28066e-06
ENSMUSG00000028339	Col15a1	3936.89	-2.04947	0.17617	-11.6335	2.78513e-31	6.4728e-29
ENSMUSG00000109394	A230057D06Rik	21.5699	-2.05034	0.339148	-6.04557	1.48882e-09	3.46908e-08
ENSMUSG00000032023	Jhy	12.8757	-2.05207	0.547281	-3.74957	0.000177139	0.0013834
ENSMUSG00000085976	Gm13816	6.27999	-2.05265	0.547083	-3.75199	0.000175434	0.00137287
ENSMUSG00000068617	Efcab1	34.014	-2.05619	0.286465	-7.17779	7.08462e-13	2.67499e-11
ENSMUSG00000105584	Gm42588	6.74272	-2.05628	0.651766	-3.15494	0.00160532	0.00928112
ENSMUSG00000034039	Prss29	443.954	-2.05908	0.389605	-5.28505	1.25669e-07	2.07847e-06
ENSMUSG00000002831	Plin4	332.667	-2.06394	0.210665	-9.79728	1.15659e-22	1.26751e-20
ENSMUSG00000020793	Galr2	18.5674	-2.06509	0.366891	-5.62861	1.8167e-08	3.55284e-07
ENSMUSG00000049409	Prokr1	10.8589	-2.06707	0.468117	-4.41572	1.00674e-05	0.000109482
ENSMUSG00000029837	1700111E14Rik	4.72395	-2.06723	0.647831	-3.191	0.0014178	0.00835279
ENSMUSG00000052373	Mpp3	58.6014	-2.07612	0.241506	-8.59654	8.21542e-18	5.55087e-16
ENSMUSG00000115858	4930588J15Rik	13.9818	-2.08054	0.5696	-3.65263	0.000259568	0.00192403
ENSMUSG00000040387	Klhl32	112.21	-2.08057	0.286879	-7.25244	4.09333e-13	1.59468e-11
ENSMUSG00000039977	Deup1	10.1041	-2.08403	0.483378	-4.31138	1.62238e-05	0.000168158
ENSMUSG00000105624	Gm43187	27.4633	-2.08883	0.377166	-5.53821	3.05571e-08	5.72472e-07
ENSMUSG00000083226	Gm7831	8.29729	-2.09529	0.533485	-3.92755	8.58156e-05	0.000740558
ENSMUSG00000047759	Hs3st3a1	7.92916	-2.10022	0.628834	-3.33986	0.000838213	0.00531373
ENSMUSG00000105470	Gm42589	11.9464	-2.10128	0.417903	-5.02816	4.95198e-07	7.27919e-06
ENSMUSG00000037579	Kcnh3	5.88899	-2.10315	0.587594	-3.57926	0.000344568	0.00245811
ENSMUSG00000106384	Gm43188	48.4266	-2.10495	0.234925	-8.9601	3.24392e-19	2.61054e-17
ENSMUSG00000053825	Ppfia2	111.07	-2.1169	0.258958	-8.17467	2.96688e-16	1.68034e-14
ENSMUSG00000020256	Aldh1l2	509.562	-2.12218	0.181786	-11.674	1.73002e-31	4.20712e-29
ENSMUSG00000105289	Gm43483	13.2625	-2.12532	0.502769	-4.22722	2.36594e-05	0.000235624
ENSMUSG00000029161	Cgref1	235.854	-2.12716	0.200401	-10.6145	2.55179e-26	3.99963e-24
ENSMUSG00000038665	Dgki	94.8045	-2.12768	0.280875	-7.57518	3.58634e-14	1.60073e-12
ENSMUSG00000079056	Kcnip3	149.337	-2.12989	0.266511	-7.99174	1.33048e-15	6.89776e-14
ENSMUSG00000075334	Rprm	219.057	-2.13031	0.27677	-7.69703	1.39265e-14	6.50684e-13
ENSMUSG00000048814	Lonrf2	33.0098	-2.13447	0.263216	-8.10919	5.09591e-16	2.79229e-14
ENSMUSG00000002012	Pnck	166.449	-2.13596	0.22555	-9.47	2.79831e-21	2.74326e-19
ENSMUSG00000052271	Bhlha15	28.9286	-2.13769	0.397151	-5.38256	7.3434e-08	1.27312e-06
ENSMUSG00000022468	Endou	17.3307	-2.14561	0.47783	-4.49032	7.11154e-06	8.00835e-05
ENSMUSG00000102984	Gm34727	9.93903	-2.14614	0.501948	-4.27561	1.90611e-05	0.000193474
ENSMUSG00000032315	Cyp1a1	12.8492	-2.14671	0.418444	-5.13022	2.89402e-07	4.47106e-06
ENSMUSG00000097065	A630075F10Rik	6.72868	-2.1488	0.578395	-3.71511	0.000203115	0.00155916
ENSMUSG00000028539	Artn	7.67954	-2.1503	0.539907	-3.98272	6.81324e-05	0.000604403
ENSMUSG00000020150	Gamt	39.7011	-2.15616	0.33913	-6.35791	2.0452e-10	5.45906e-09
ENSMUSG00000030162	Olr1	444.995	-2.16006	0.667468	-3.23619	0.00121136	0.00731564
ENSMUSG00000106570	C230071H17Rik	30.6906	-2.16063	0.283635	-7.61765	2.58326e-14	1.16849e-12
ENSMUSG00000109178	Gm3257	6.18986	-2.16309	0.61274	-3.53019	0.000415262	0.00288208
ENSMUSG00000029675	Eln	6152.85	-2.16746	0.338294	-6.40702	1.48393e-10	4.04912e-09
ENSMUSG00000027208	Fgf7	264.443	-2.16986	0.216661	-10.015	1.30921e-23	1.58986e-21
ENSMUSG00000056643	Chst13	39.7767	-2.17323	0.473573	-4.58901	4.45358e-06	5.24374e-05
ENSMUSG00000025889	Snca	43.1942	-2.17354	0.379422	-5.72855	1.01291e-08	2.075e-07
ENSMUSG00000036242	Armh4	348.089	-2.1795	0.149696	-14.5595	5.07928e-48	3.60348e-45
ENSMUSG00000105975	Gm42609	36.7283	-2.18195	0.25584	-8.5286	1.4813e-17	9.62272e-16
ENSMUSG00000074505	Fat3	941.594	-2.18337	0.256262	-8.52008	1.5945e-17	1.03084e-15
ENSMUSG00000001270	Ckb	1796.62	-2.18486	0.211523	-10.3292	5.20004e-25	7.15245e-23
ENSMUSG00000086233	Gm11816	49.396	-2.18679	0.361659	-6.04656	1.47975e-09	3.4569e-08
ENSMUSG00000040703	Cyp2s1	191.033	-2.18742	0.426969	-5.12315	3.00473e-07	4.62091e-06
ENSMUSG00000038763	Alpk3	15.3538	-2.18776	0.386091	-5.66644	1.45797e-08	2.91517e-07
ENSMUSG00000042379	Esm1	90.8814	-2.18849	0.358931	-6.09724	1.07915e-09	2.56323e-08
ENSMUSG00000038077	Kcna6	6.81625	-2.19112	0.640239	-3.42235	0.000620821	0.00409611
ENSMUSG00000115414	Gm49257	9.19542	-2.19237	0.496065	-4.41953	9.89166e-06	0.000107963
ENSMUSG00000035275	Raver2	461.905	-2.19345	0.209868	-10.4516	1.44123e-25	2.10023e-23
ENSMUSG00000054196	Cthrc1	69.7131	-2.19395	0.340807	-6.4375	1.2146e-10	3.34467e-09
ENSMUSG00000063713	Klk1b24	43.7372	-2.19553	0.621426	-3.53305	0.000410788	0.00285571
ENSMUSG00000047182	Irs3	14.85	-2.19948	0.428961	-5.12747	2.93664e-07	4.53171e-06
ENSMUSG00000112129	Pbld1	17.8062	-2.20058	0.405577	-5.42581	5.76914e-08	1.02457e-06
ENSMUSG00000106395	Gm42439	23.8706	-2.20468	0.32241	-6.83811	8.02436e-12	2.61267e-10
ENSMUSG00000023336	Wfdc1	192.475	-2.20517	0.224009	-9.84414	7.26569e-23	8.19564e-21
ENSMUSG00000032528	Vipr1	36.1755	-2.20626	0.26858	-8.21454	2.12975e-16	1.22161e-14
ENSMUSG00000045201	Lrrc3b	7.56004	-2.21984	0.555354	-3.99717	6.41044e-05	0.000572817
ENSMUSG00000024076	Vit	217.448	-2.22193	0.294284	-7.55029	4.34286e-14	1.90893e-12
ENSMUSG00000106320	Gm42992	107.251	-2.22666	0.212225	-10.4919	9.40814e-26	1.40908e-23
ENSMUSG00000041669	Prima1	7.69406	-2.2278	0.539785	-4.1272	3.67214e-05	0.000349814
ENSMUSG00000032648	Pygm	115.139	-2.23672	0.205551	-10.8816	1.41064e-27	2.39179e-25
ENSMUSG00000105726	Gm42443	8.76085	-2.23682	0.561099	-3.9865	6.70552e-05	0.000596221
ENSMUSG00000026587	Astn1	53.3372	-2.24185	0.255388	-8.77818	1.66144e-18	1.22379e-16
ENSMUSG00000101636	4930579H20Rik	14.6141	-2.24321	0.405667	-5.52968	3.20813e-08	5.99779e-07
ENSMUSG00000026443	Lrrn2	109.597	-2.24638	0.209973	-10.6985	1.03472e-26	1.6506e-24
ENSMUSG00000113191	Gm48343	9.40888	-2.2471	0.501869	-4.47745	7.55389e-06	8.44451e-05
ENSMUSG00000085125	Gm16070	42.2731	-2.25293	0.301646	-7.46878	8.0939e-14	3.42012e-12
ENSMUSG00000044033	Ccdc141	2454.79	-2.25415	0.257261	-8.7621	1.91645e-18	1.40396e-16
ENSMUSG00000085055	Gm15958	4.67035	-2.25783	0.671435	-3.3627	0.000771854	0.00494732
ENSMUSG00000097806	Gm6556	5.30681	-2.2589	0.627791	-3.59818	0.000320453	0.00230622
ENSMUSG00000106557	Gm42442	11.1964	-2.26429	0.487952	-4.64039	3.47758e-06	4.20791e-05
ENSMUSG00000106450	Gm43018	18.3182	-2.26455	0.400525	-5.65394	1.56811e-08	3.11301e-07
ENSMUSG00000024176	Sox8	10.3007	-2.26577	0.524137	-4.32287	1.54016e-05	0.000160251
ENSMUSG00000106386	Gm42991	72.4599	-2.27015	0.206317	-11.0032	3.6869e-28	6.71589e-26
ENSMUSG00000032454	Rbp2	42.2224	-2.27269	0.540383	-4.2057	2.6028e-05	0.000256198
ENSMUSG00000103931	Gm36962	29.785	-2.27553	0.332143	-6.85106	7.33073e-12	2.40133e-10
ENSMUSG00000031273	Col4a6	996.918	-2.28229	0.250244	-9.12026	7.49478e-20	6.45532e-18
ENSMUSG00000047261	Gap43	43.4323	-2.28615	0.544539	-4.19833	2.68896e-05	0.000263964
ENSMUSG00000021702	Thbs4	1116.67	-2.3097	0.567178	-4.07228	4.65561e-05	0.000432944
ENSMUSG00000080942	Zfp36l1-ps	7.25326	-2.31597	0.573193	-4.04047	5.33431e-05	0.000487447
ENSMUSG00000050447	Lypd6	56.449	-2.32627	0.272896	-8.52436	1.53664e-17	9.95821e-16
ENSMUSG00000102963	Gm37945	11.8829	-2.32912	0.449494	-5.18164	2.19938e-07	3.48578e-06
ENSMUSG00000034732	Pabpc5	6.94878	-2.32991	0.651385	-3.57685	0.000347761	0.002475
ENSMUSG00000028033	Kcnq5	267.124	-2.33149	0.335272	-6.95404	3.54979e-12	1.22534e-10
ENSMUSG00000105598	Gm43186	11.2756	-2.3324	0.517348	-4.50837	6.53287e-06	7.43748e-05
ENSMUSG00000055691	Gja6	8.61673	-2.33768	0.526608	-4.43913	9.03229e-06	9.9551e-05
ENSMUSG00000027220	Syt13	27.0272	-2.33866	0.315745	-7.40682	1.29366e-13	5.34084e-12
ENSMUSG00000106045	Gm42996	23.4286	-2.34014	0.32556	-7.18803	6.57328e-13	2.49942e-11
ENSMUSG00000032338	Hcn4	16.6842	-2.34287	0.480484	-4.87606	1.08226e-06	1.48633e-05
ENSMUSG00000058297	Spock2	1081.06	-2.3476	0.354493	-6.62242	3.53361e-11	1.0632e-09
ENSMUSG00000070337	Gpr179	6.83423	-2.35073	0.551435	-4.26293	2.01766e-05	0.000203723
ENSMUSG00000105985	Gm42993	145.521	-2.35414	0.235366	-10.002	1.49319e-23	1.78911e-21
ENSMUSG00000085280	Gm16151	9.52445	-2.35795	0.51471	-4.58112	4.62496e-06	5.42105e-05
ENSMUSG00000037016	Frem2	121.392	-2.3585	0.312121	-7.55639	4.14425e-14	1.83155e-12
ENSMUSG00000107251	Gm43102	8.10081	-2.35953	0.584832	-4.03455	5.4708e-05	0.000498773
ENSMUSG00000041020	Map7d2	83.325	-2.36134	0.383085	-6.16401	7.09265e-10	1.73986e-08
ENSMUSG00000035407	Kank4	32.583	-2.3622	0.343336	-6.88015	5.97907e-12	1.98265e-10
ENSMUSG00000085996	A830012C17Rik	15.7273	-2.3806	0.399347	-5.96124	2.50337e-09	5.63341e-08
ENSMUSG00000027796	Smad9	33.609	-2.38739	0.39689	-6.01523	1.7963e-09	4.12842e-08
ENSMUSG00000039628	Hs3st6	6.37176	-2.38857	0.583058	-4.09662	4.19225e-05	0.000394619
ENSMUSG00000089045	Gm26169	20.1819	-2.38946	0.539833	-4.4263	9.58615e-06	0.00010514
ENSMUSG00000049694	BC048671	15.3167	-2.39184	0.410414	-5.82786	5.61413e-09	1.20503e-07
ENSMUSG00000015405	Ace2	35.9498	-2.39621	0.29874	-8.02106	1.0484e-15	5.49878e-14
ENSMUSG00000025776	Crispld1	81.476	-2.40611	0.227974	-10.5543	4.85091e-26	7.34695e-24
ENSMUSG00000104936	2610011E03Rik	41.8028	-2.41095	0.242684	-9.93455	2.94507e-23	3.44914e-21
ENSMUSG00000074736	Syndig1	68.6224	-2.41365	0.312308	-7.72845	1.08867e-14	5.20378e-13
ENSMUSG00000047797	Gjb1	150.086	-2.42506	0.361954	-6.69992	2.0853e-11	6.45437e-10
ENSMUSG00000027861	Casq2	372.774	-2.42916	0.254144	-9.55819	1.19833e-21	1.19651e-19
ENSMUSG00000115970	8430426J06Rik	11.0858	-2.43329	0.455837	-5.33807	9.39405e-08	1.5938e-06
ENSMUSG00000021765	Fst	1634.73	-2.43872	0.232245	-10.5006	8.57959e-26	1.29216e-23
ENSMUSG00000070495	Ctcfl	5.80648	-2.44099	0.674568	-3.6186	0.000296199	0.00215467
ENSMUSG00000105495	Gm42995	17.7877	-2.44569	0.398554	-6.1364	8.44106e-10	2.05567e-08
ENSMUSG00000027875	Hmgcs2	798.258	-2.4586	0.280452	-8.76656	1.84214e-18	1.35319e-16
ENSMUSG00000033595	Lgi3	24.282	-2.47227	0.411747	-6.00433	1.9212e-09	4.38187e-08
ENSMUSG00000004110	Cacna1e	217.41	-2.4786	0.131504	-18.8481	3.04522e-79	9.12178e-76
ENSMUSG00000027376	Prom2	29.9455	-2.48	0.49481	-5.01203	5.38579e-07	7.82303e-06
ENSMUSG00000035258	Abi3bp	1739.01	-2.483	0.179163	-13.8589	1.12442e-43	6.18635e-41
ENSMUSG00000112201	4930532I03Rik	8.74189	-2.48334	0.556805	-4.45999	8.19635e-06	9.10072e-05
ENSMUSG00000099564	Gm28729	12.7915	-2.4931	0.470356	-5.30045	1.15516e-07	1.92353e-06
ENSMUSG00000027792	Bche	151.211	-2.49994	0.393694	-6.34997	2.15352e-10	5.71426e-09
ENSMUSG00000041216	Clvs1	23.1328	-2.50112	0.435587	-5.74195	9.35903e-09	1.9231e-07
ENSMUSG00000087500	Gm12426	5.99565	-2.50207	0.642077	-3.89684	9.74555e-05	0.000827689
ENSMUSG00000055312	Them7	29.6752	-2.50298	0.467259	-5.35673	8.47417e-08	1.45328e-06
ENSMUSG00000019139	Isyna1	1093.31	-2.50374	0.426894	-5.86501	4.49107e-09	9.77197e-08
ENSMUSG00000028758	Kif17	24.7821	-2.50561	0.384936	-6.50916	7.55716e-11	2.14909e-09
ENSMUSG00000042567	Nek10	58.7094	-2.50576	0.331231	-7.56501	3.87841e-14	1.72538e-12
ENSMUSG00000104210	Gm37984	10.872	-2.51099	0.483436	-5.19405	2.05766e-07	3.27078e-06
ENSMUSG00000036131	Frmd7	7.34962	-2.51329	0.692335	-3.63016	0.000283249	0.00207385
ENSMUSG00000053963	Stum	139.54	-2.52139	0.329765	-7.646	2.07321e-14	9.44117e-13
ENSMUSG00000053519	Kcnip1	20.242	-2.52416	0.476898	-5.29287	1.20411e-07	1.99763e-06
ENSMUSG00000071178	Serpina1b	6.14034	-2.52651	0.792701	-3.18722	0.00143646	0.00844611
ENSMUSG00000025175	Fn3k	7.60177	-2.53538	0.561109	-4.51851	6.22764e-06	7.12308e-05
ENSMUSG00000047976	Kcna1	26.6714	-2.54215	0.353551	-7.19033	6.46335e-13	2.46109e-11
ENSMUSG00000032978	Guca2b	9459.65	-2.54216	0.611611	-4.15649	3.23171e-05	0.000312159
ENSMUSG00000047638	Nr1h4	10.2725	-2.54625	0.591389	-4.30555	1.66571e-05	0.000171987
ENSMUSG00000115228	Gm48948	6.36619	-2.54804	0.60716	-4.19665	2.70889e-05	0.00026556
ENSMUSG00000066687	Zbtb16	895.185	-2.55264	0.233368	-10.9383	7.56292e-28	1.36234e-25
ENSMUSG00000022510	Trp63	6.34912	-2.5588	0.617487	-4.1439	3.41447e-05	0.000327233
ENSMUSG00000086596	Susd5	58.9522	-2.55949	0.371899	-6.8822	5.89365e-12	1.96157e-10
ENSMUSG00000028976	Slc2a5	9.7656	-2.55999	0.658372	-3.88836	0.000100925	0.000854728
ENSMUSG00000043629	1700019D03Rik	31.4218	-2.56177	0.310136	-8.26015	1.45484e-16	8.47109e-15
ENSMUSG00000104994	Gm42989	26.8444	-2.56527	0.338767	-7.57238	3.6645e-14	1.63291e-12
ENSMUSG00000024957	Kcnk4	6.48098	-2.56539	0.634628	-4.04235	5.29183e-05	0.000484094
ENSMUSG00000086555	Gm13446	10.533	-2.56566	0.519759	-4.93625	7.96371e-07	1.11613e-05
ENSMUSG00000030160	Tmem52b	27.7568	-2.5876	0.443562	-5.8337	5.42117e-09	1.16826e-07
ENSMUSG00000067276	Capn6	94.7449	-2.5878	0.270562	-9.56453	1.12709e-21	1.12956e-19
ENSMUSG00000030669	Calca	22.6171	-2.58831	0.39276	-6.59005	4.3969e-11	1.30259e-09
ENSMUSG00000031932	Gpr83	126.646	-2.58887	0.214477	-12.0706	1.51007e-33	4.57416e-31
ENSMUSG00000064325	Hhip	48.946	-2.6005	0.424955	-6.11949	9.38772e-10	2.26777e-08
ENSMUSG00000087399	Gm11899	3.56621	-2.60422	0.82866	-3.14269	0.00167403	0.00960593
ENSMUSG00000003872	Lin7b	10.7864	-2.61029	0.494106	-5.28285	1.27189e-07	2.10232e-06
ENSMUSG00000027849	Syt6	23.0805	-2.61082	0.404998	-6.44651	1.14458e-10	3.16156e-09
ENSMUSG00000030359	Pzp	7.94227	-2.61122	0.766248	-3.40781	0.000654872	0.00428512
ENSMUSG00000035540	Gc	6.4675	-2.61421	0.730587	-3.57823	0.000345933	0.00246494
ENSMUSG00000111055	D030034A15Rik	4.29165	-2.61472	0.788434	-3.31635	0.00091203	0.00571863
ENSMUSG00000050503	Fbxl22	412.638	-2.62304	0.187548	-13.986	1.89868e-44	1.13748e-41
ENSMUSG00000104138	Gm36949	13.3301	-2.63794	0.495622	-5.32248	1.0236e-07	1.72041e-06
ENSMUSG00000113581	Dio3os	81.6353	-2.64066	0.224664	-11.7538	6.75011e-32	1.73311e-29
ENSMUSG00000031845	Bco1	115.443	-2.65881	0.314714	-8.44834	2.95474e-17	1.84391e-15
ENSMUSG00000097684	Gm26645	4.55115	-2.6768	0.719718	-3.71924	0.000199826	0.00153742
ENSMUSG00000102494	Gm36988	29.0015	-2.67861	0.364866	-7.34133	2.11482e-13	8.50945e-12
ENSMUSG00000029334	Prkg2	158.548	-2.68985	0.264709	-10.1616	2.94316e-24	3.81464e-22
ENSMUSG00000095407	Tmem200c	273.49	-2.69348	0.290271	-9.27919	1.70769e-20	1.55614e-18
ENSMUSG00000024171	Prss28	100.096	-2.70422	0.410987	-6.57983	4.7099e-11	1.38618e-09
ENSMUSG00000074595	Wfdc6a	5.48481	-2.70704	0.784241	-3.45179	0.000556871	0.00372616
ENSMUSG00000025576	Rbfox3	20.1281	-2.71318	0.51984	-5.21926	1.79644e-07	2.89308e-06
ENSMUSG00000046844	Vat1l	10.9052	-2.71708	0.604339	-4.49596	6.92565e-06	7.83174e-05
ENSMUSG00000041559	Fmod	301.147	-2.71714	0.245935	-11.0482	2.23658e-28	4.15834e-26
ENSMUSG00000112466	Gm29674	3.91538	-2.73514	0.795496	-3.43829	0.000585404	0.00389196
ENSMUSG00000106516	Gm42441	9.3156	-2.73647	0.544145	-5.02893	4.93212e-07	7.25792e-06
ENSMUSG00000068614	Actc1	68.4029	-2.74129	0.366171	-7.48635	7.08164e-14	3.03038e-12
ENSMUSG00000006642	Tcf23	1923.76	-2.76986	0.229171	-12.0864	1.24592e-33	3.81691e-31
ENSMUSG00000113682	Gm48630	5.57297	-2.77122	0.710467	-3.90057	9.59668e-05	0.000817325
ENSMUSG00000004473	Clec11a	228.68	-2.77479	0.245662	-11.2952	1.38652e-29	2.7895e-27
ENSMUSG00000052305	Hbb-bs	2698.74	-2.7971	0.228404	-12.2463	1.75884e-34	5.57841e-32
ENSMUSG00000022340	Sybu	54.006	-2.79923	0.302457	-9.25497	2.14293e-20	1.92571e-18
ENSMUSG00000105562	Gm43287	60.7793	-2.8102	0.400583	-7.01526	2.29517e-12	8.13083e-11
ENSMUSG00000032394	Igdcc3	5.79341	-2.81706	0.751428	-3.74894	0.000177581	0.00138605
ENSMUSG00000064452	Gm24564	3.29116	-2.81848	0.876781	-3.21458	0.00130635	0.00780541
ENSMUSG00000075604	Cyp11b1	30.6069	-2.83947	0.548252	-5.17913	2.22924e-07	3.52689e-06
ENSMUSG00000106490	Gm43283	514.242	-2.84303	0.321293	-8.8487	8.85426e-19	6.70511e-17
ENSMUSG00000021123	Rdh12	296.392	-2.8461	0.408896	-6.96044	3.3922e-12	1.17545e-10
ENSMUSG00000089995	Gm15716	7.65141	-2.84634	0.762515	-3.73283	0.000189337	0.0014655
ENSMUSG00000105773	4930563F08Rik	8.39944	-2.84722	0.56382	-5.04988	4.42099e-07	6.58119e-06
ENSMUSG00000040165	Cd209c	7.64258	-2.85905	0.602974	-4.74158	2.12054e-06	2.72486e-05
ENSMUSG00000100053	Gm28154	83.4811	-2.86025	0.278685	-10.2634	1.03021e-24	1.39566e-22
ENSMUSG00000006567	Atp7b	97.6089	-2.86298	0.44126	-6.48819	8.68762e-11	2.44223e-09
ENSMUSG00000103331	Gm37995	3.39671	-2.86793	0.896282	-3.1998	0.00137521	0.00814284
ENSMUSG00000097736	9530059O14Rik	239.883	-2.88282	0.704213	-4.09368	4.24587e-05	0.000398692
ENSMUSG00000093446	Gm20694	3.40104	-2.88609	0.892956	-3.23206	0.00122899	0.00740886
ENSMUSG00000021700	Rab3c	8.52345	-2.88657	0.595582	-4.84663	1.25574e-06	1.69947e-05
ENSMUSG00000028011	Tdo2	198.665	-2.88786	0.298685	-9.66856	4.10125e-22	4.31897e-20
ENSMUSG00000113737	BB123696	21.5274	-2.88848	0.375774	-7.68676	1.50913e-14	7.0025e-13
ENSMUSG00000048038	Ccdc187	21.1615	-2.89188	0.513522	-5.63147	1.78681e-08	3.49822e-07
ENSMUSG00000097520	4930488L21Rik	7.04467	-2.89822	0.661439	-4.3817	1.1776e-05	0.00012563
ENSMUSG00000067780	Pi15	3669.1	-2.90194	0.293922	-9.87317	5.44187e-23	6.19018e-21
ENSMUSG00000027966	Col11a1	3804.16	-2.90239	0.246172	-11.7901	4.39151e-32	1.17219e-29
ENSMUSG00000060882	Kcnd2	87.401	-2.91964	0.459767	-6.35026	2.14947e-10	5.71152e-09
ENSMUSG00000069917	Hba-a2	298.076	-2.92149	0.297	-9.83669	7.82403e-23	8.78866e-21
ENSMUSG00000063455	D630045J12Rik	718.956	-2.92755	0.25936	-11.2876	1.51153e-29	3.01846e-27
ENSMUSG00000021613	Hapln1	9.88352	-2.95071	0.634974	-4.64697	3.36841e-06	4.09233e-05
ENSMUSG00000044177	Wfikkn2	245.455	-2.95105	0.290937	-10.1433	3.55068e-24	4.51523e-22
ENSMUSG00000031494	Cd209a	47.6019	-2.96613	0.508889	-5.82864	5.58807e-09	1.20039e-07
ENSMUSG00000106012	Gm43744	41.6712	-2.96697	0.428583	-6.92273	4.43013e-12	1.5004e-10
ENSMUSG00000044726	Erich5	10.7623	-2.96777	0.701158	-4.23266	2.30941e-05	0.000230847
ENSMUSG00000106220	Gm43288	477.534	-2.97153	0.340031	-8.73902	2.35142e-18	1.69045e-16
ENSMUSG00000074248	4930432M17Rik	6.29959	-2.97586	0.812621	-3.66205	0.000250205	0.00186369
ENSMUSG00000039672	Kcne2	319.64	-2.9809	0.582626	-5.11631	3.11565e-07	4.77786e-06
ENSMUSG00000031397	Tktl1	40.0852	-2.98511	0.495548	-6.02387	1.70296e-09	3.92394e-08
ENSMUSG00000031097	Tnni2	298.761	-2.9917	0.470345	-6.36065	2.00901e-10	5.38379e-09
ENSMUSG00000031022	BC051019	117.529	-3.00027	0.254947	-11.7682	5.69322e-32	1.48675e-29
ENSMUSG00000026828	Galnt5	22.992	-3.00719	0.529535	-5.67892	1.35546e-08	2.727e-07
ENSMUSG00000060530	A930017M01Rik	6.44394	-3.01195	0.682777	-4.41133	1.0274e-05	0.00011128
ENSMUSG00000111143	Gm47134	10.1623	-3.01306	0.632664	-4.7625	1.91208e-06	2.48903e-05
ENSMUSG00000033981	Gria2	3.75226	-3.03337	0.939965	-3.22711	0.00125046	0.00751605
ENSMUSG00000041468	Gpr12	7.66545	-3.05837	0.738666	-4.14039	3.46709e-05	0.000331922
ENSMUSG00000073940	Hbb-bt	174.725	-3.07745	0.34271	-8.97974	2.7141e-19	2.23078e-17
ENSMUSG00000010122	Slc47a1	7.86707	-3.09578	0.70369	-4.39935	1.08576e-05	0.000116664
ENSMUSG00000003657	Calb2	5.89961	-3.09617	0.768475	-4.02898	5.60195e-05	0.000509524
ENSMUSG00000109780	Gm45447	14.6301	-3.10098	0.536146	-5.78383	7.30171e-09	1.5295e-07
ENSMUSG00000085329	2810404F17Rik	8.53684	-3.103	0.886427	-3.50057	0.000464262	0.00318312
ENSMUSG00000028357	Kif12	10.7498	-3.10883	0.75901	-4.0959	4.20529e-05	0.000395708
ENSMUSG00000086874	Gm13175	11.8701	-3.11232	0.507816	-6.12883	8.85289e-10	2.14242e-08
ENSMUSG00000021263	Degs2	201.016	-3.13763	0.394163	-7.96023	1.7172e-15	8.83475e-14
ENSMUSG00000111837	Gm47135	20.5697	-3.14478	0.688858	-4.5652	4.99012e-06	5.82975e-05
ENSMUSG00000029700	Slc13a1	15.7258	-3.15062	0.886868	-3.55252	0.000381553	0.00268221
ENSMUSG00000104987	2810432F15Rik	5.00328	-3.16685	0.806872	-3.92484	8.67865e-05	0.000748442
ENSMUSG00000085933	Tmem61	8.12208	-3.17148	0.632008	-5.0181	5.21854e-07	7.62943e-06
ENSMUSG00000082100	Glns-ps1	4.12402	-3.17406	0.906938	-3.49975	0.000465693	0.00319131
ENSMUSG00000063130	Calml3	209.049	-3.18642	0.394319	-8.08082	6.43352e-16	3.48977e-14
ENSMUSG00000069919	Hba-a1	944.697	-3.18987	0.231157	-13.7996	2.56239e-43	1.38159e-40
ENSMUSG00000026360	Rgs2	2239.12	-3.19317	0.185596	-17.2049	2.43931e-66	4.38409e-63
ENSMUSG00000109143	Gm10046	4.24504	-3.19692	0.912396	-3.50387	0.000458552	0.00314798
ENSMUSG00000010086	Rnf112	9.41207	-3.20432	0.628499	-5.09837	3.42589e-07	5.22095e-06
ENSMUSG00000087382	Ctcflos	4.16568	-3.2163	0.974795	-3.29946	0.000968695	0.0060165
ENSMUSG00000039492	Ccdc27	8.42699	-3.21854	0.680168	-4.73197	2.22352e-06	2.8396e-05
ENSMUSG00000039313	Minar1	31.2215	-3.21921	0.501079	-6.42455	1.32258e-10	3.62618e-09
ENSMUSG00000103748	Gm38243	61.981	-3.23452	0.325594	-9.9342	2.95542e-23	3.44914e-21
ENSMUSG00000045813	Gm9801	22.6697	-3.24521	0.468706	-6.92377	4.39767e-12	1.49316e-10
ENSMUSG00000085675	Gm12022	14.8016	-3.24667	0.49127	-6.60874	3.87598e-11	1.15717e-09
ENSMUSG00000105683	Gm43487	4.25195	-3.25853	0.883197	-3.68947	0.000224724	0.00170178
ENSMUSG00000105724	Gm44360	8.63873	-3.26294	0.627352	-5.20113	1.9808e-07	3.16166e-06
ENSMUSG00000029838	Ptn	2091.84	-3.27726	0.198774	-16.4874	4.52187e-61	6.77251e-58
ENSMUSG00000097109	Gm26580	58.5421	-3.27962	0.358013	-9.16061	5.16046e-20	4.48777e-18
ENSMUSG00000031495	Cd209d	3.28314	-3.2928	1.00199	-3.28628	0.00101522	0.00626872
ENSMUSG00000064586	Gm25132	5.43135	-3.29567	0.761974	-4.32518	1.52406e-05	0.000158945
ENSMUSG00000001095	Slc13a2	35.9353	-3.31704	0.661311	-5.01586	5.27979e-07	7.68979e-06
ENSMUSG00000108290	Gm44120	9.16426	-3.33512	0.758643	-4.39617	1.10178e-05	0.00011815
ENSMUSG00000039239	Tgfb2	8057.63	-3.33535	0.330227	-10.1002	5.51519e-24	6.88351e-22
ENSMUSG00000043789	Vwce	55.011	-3.34718	0.286731	-11.6736	1.73862e-31	4.20712e-29
ENSMUSG00000000805	Car4	1104.12	-3.35813	0.419782	-7.9997	1.24718e-15	6.47838e-14
ENSMUSG00000025892	Gria4	43.5229	-3.35935	0.380964	-8.81803	1.16491e-18	8.74785e-17
ENSMUSG00000041565	L3mbtl4	78.9835	-3.36825	0.299909	-11.2309	2.87595e-29	5.61831e-27
ENSMUSG00000108022	Gm7298	8.08644	-3.37155	0.649038	-5.19469	2.05063e-07	3.26267e-06
ENSMUSG00000024738	Pga5	3.47427	-3.39584	1.04982	-3.23468	0.00121779	0.0073479
ENSMUSG00000083498	Gm14172	2.43503	-3.40237	1.08362	-3.13983	0.00169046	0.00968405
ENSMUSG00000103320	Gm37403	4.67243	-3.41451	0.905936	-3.76904	0.000163877	0.00129218
ENSMUSG00000111652	Gm48726	8.45667	-3.43726	0.634207	-5.41978	5.96728e-08	1.05559e-06
ENSMUSG00000117093	CT573017.2	67.4029	-3.44356	0.362101	-9.50994	1.90767e-21	1.88384e-19
ENSMUSG00000006574	Slc4a1	24.8425	-3.4648	0.512238	-6.76404	1.34195e-11	4.22637e-10
ENSMUSG00000004415	Col26a1	2.50925	-3.46594	1.10174	-3.14588	0.00165588	0.00952034
ENSMUSG00000007097	Atp1a2	129.758	-3.47235	0.258524	-13.4315	3.95524e-41	2.01188e-38
ENSMUSG00000021943	Gdf10	258.638	-3.475	0.274108	-12.6775	7.88023e-37	2.9506e-34
ENSMUSG00000023047	Amhr2	3.78073	-3.47693	0.983676	-3.53463	0.000408344	0.00284225
ENSMUSG00000025400	Tac2	63.0152	-3.48148	0.385051	-9.04161	1.54379e-19	1.28454e-17
ENSMUSG00000097730	Gm26588	27.318	-3.4944	0.601618	-5.80834	6.30952e-09	1.33936e-07
ENSMUSG00000106826	Gm42583	127.038	-3.50132	0.299946	-11.6732	1.74783e-31	4.20712e-29
ENSMUSG00000045246	Kcng4	2.54915	-3.50337	1.10322	-3.1756	0.00149529	0.00872601
ENSMUSG00000024987	Cyp26a1	63.5534	-3.51674	0.623254	-5.64254	1.67557e-08	3.30445e-07
ENSMUSG00000099895	Gm28153	2.66639	-3.53898	1.10657	-3.19815	0.00138311	0.00817523
ENSMUSG00000110427	4933406B17Rik	51.4431	-3.54923	0.573749	-6.18603	6.17e-10	1.52603e-08
ENSMUSG00000023073	Slc10a2	2.62361	-3.55013	1.1312	-3.13838	0.00169886	0.00972594
ENSMUSG00000037709	Fam13a	2092.32	-3.56205	0.417525	-8.53136	1.44638e-17	9.44137e-16
ENSMUSG00000092323	BB365896	219.205	-3.56343	0.448821	-7.93953	2.02954e-15	1.03823e-13
ENSMUSG00000097767	Miat	104.725	-3.60993	0.317265	-11.3783	5.36461e-30	1.12112e-27
ENSMUSG00000026532	Spta1	24.2349	-3.61546	0.446957	-8.08906	6.01245e-16	3.27454e-14
ENSMUSG00000113193	Gm40576	4.21783	-3.67365	0.948401	-3.87351	0.000107277	0.000897046
ENSMUSG00000106855	5330437M03Rik	9.76194	-3.68044	0.640748	-5.74398	9.24771e-09	1.90167e-07
ENSMUSG00000004328	Hif3a	262.4	-3.7014	0.205212	-18.0369	9.99325e-73	2.24507e-69
ENSMUSG00000030399	Ckm	30.3107	-3.70149	0.465686	-7.94846	1.88849e-15	9.67907e-14
ENSMUSG00000107439	Gm45060	44.0385	-3.72654	0.470637	-7.91808	2.4121e-15	1.22003e-13
ENSMUSG00000108807	4833404L02Rik	8.99903	-3.77928	0.785397	-4.81193	1.49477e-06	1.9851e-05
ENSMUSG00000082476	Gm12242	3.17095	-3.81299	1.07558	-3.54505	0.000392542	0.00274657
ENSMUSG00000083710	Gm15078	2.08723	-3.83251	1.18318	-3.23917	0.00119879	0.00725493
ENSMUSG00000112937	Gm17746	2.10551	-3.84153	1.12809	-3.40533	0.000660839	0.00431892
ENSMUSG00000097869	C230021G24Rik	3.24299	-3.84423	1.04252	-3.68744	0.000226518	0.00171344
ENSMUSG00000031289	Il13ra2	11.0458	-3.86139	0.61989	-6.22914	4.68989e-10	1.17505e-08
ENSMUSG00000058806	Col13a1	20.6981	-3.86275	0.466837	-8.27432	1.29191e-16	7.58794e-15
ENSMUSG00000108311	Gm44737	22.1823	-3.86915	0.476095	-8.12685	4.40581e-16	2.43893e-14
ENSMUSG00000108075	Gm45061	64.2701	-3.87579	0.473794	-8.18032	2.83089e-16	1.60669e-14
ENSMUSG00000044217	Aqp5	497.697	-3.88698	0.322581	-12.0496	1.94845e-33	5.83647e-31
ENSMUSG00000041791	Capza3	2.26848	-3.96316	1.11414	-3.55715	0.000374894	0.00264367
ENSMUSG00000049336	Tenm2	107.663	-3.98955	0.318045	-12.544	4.28791e-36	1.56213e-33
ENSMUSG00000054966	Lmntd1	3.55046	-3.99889	1.0503	-3.8074	0.000140436	0.00113252
ENSMUSG00000034936	Arl4d	550.501	-4.01363	0.262284	-15.3026	7.34452e-53	6.38712e-50
ENSMUSG00000102985	4930456G14Rik	2.40754	-4.04018	1.092	-3.69981	0.000215759	0.00164405
ENSMUSG00000074199	Krtdap	5.34025	-4.04086	1.03284	-3.91239	9.13867e-05	0.000783617
ENSMUSG00000029368	Alb	239.604	-4.04097	0.388197	-10.4096	2.24203e-25	3.19803e-23
ENSMUSG00000035594	Chrna5	3.6826	-4.05374	1.03322	-3.92342	8.73022e-05	0.000751702
ENSMUSG00000108349	Gm18599	1.58391	-4.05911	1.20792	-3.36043	0.000778218	0.00498173
ENSMUSG00000062257	Opcml	54.0546	-4.06837	0.840116	-4.84263	1.2813e-06	1.73059e-05
ENSMUSG00000021364	Elovl2	40.7367	-4.07182	0.524558	-7.76238	8.33485e-15	4.00533e-13
ENSMUSG00000102362	4930509J09Rik	1.61345	-4.10689	1.24223	-3.30605	0.000946199	0.00589521
ENSMUSG00000084180	Gm15237	1.64424	-4.12469	1.17441	-3.51215	0.000444504	0.00306481
ENSMUSG00000109827	Gm6213	1.66505	-4.13684	1.21487	-3.40516	0.000661242	0.00431947
ENSMUSG00000101940	Akp-ps1	32.7434	-4.15649	0.415817	-9.99596	1.58741e-23	1.89359e-21
ENSMUSG00000061742	Slc22a12	2.60922	-4.15819	1.07121	-3.88179	0.000103692	0.000873575
ENSMUSG00000030834	Abcc6	1.68748	-4.17692	1.222	-3.4181	0.0006306	0.00415048
ENSMUSG00000075707	Dio3	463.083	-4.20002	0.416105	-10.0937	5.89282e-24	7.32095e-22
ENSMUSG00000004031	Brinp2	54.4226	-4.20757	0.382297	-11.006	3.57421e-28	6.5549e-26
ENSMUSG00000023011	Faim2	38.5145	-4.23911	0.520991	-8.13662	4.06458e-16	2.27338e-14
ENSMUSG00000075826	Gm23691	1.80501	-4.26902	1.16241	-3.67255	0.000240138	0.00179738
ENSMUSG00000030762	Aqp8	989.828	-4.28425	0.311469	-13.755	4.75467e-43	2.46502e-40
ENSMUSG00000099146	0610031O16Rik	4.27043	-4.29532	1.10535	-3.88596	0.000101928	0.000861946
ENSMUSG00000045871	Slitrk6	2.84643	-4.29592	1.21248	-3.54309	0.000395473	0.00276277
ENSMUSG00000052217	Hbb-bh1	1.86645	-4.32187	1.25324	-3.44856	0.000563578	0.0037645
ENSMUSG00000113978	Gm48260	31.9466	-4.32337	0.457277	-9.45459	3.24301e-21	3.16769e-19
ENSMUSG00000047586	Nccrp1	1.91527	-4.3288	1.23933	-3.49285	0.000477895	0.00326331
ENSMUSG00000027870	Hao2	4.42735	-4.34619	1.18991	-3.65252	0.000259674	0.00192429
ENSMUSG00000035615	Frmpd1	68.0725	-4.35898	0.316461	-13.7741	3.64836e-43	1.92855e-40
ENSMUSG00000104336	Gm34240	3.02633	-4.38786	1.18186	-3.71267	0.000205081	0.00157202
ENSMUSG00000052131	Akr1b7	1612.66	-4.4094	0.546107	-8.07424	6.78958e-16	3.66814e-14
ENSMUSG00000055730	Ces2a	1.99245	-4.41155	1.14433	-3.85513	0.000115666	0.000958869
ENSMUSG00000117274	AC154493.1	4.82116	-4.46458	1.01092	-4.41635	1.00382e-05	0.000109298
ENSMUSG00000031972	Acta1	1159.89	-4.47296	0.21033	-21.2664	2.32575e-100	1.254e-96
ENSMUSG00000051051	Olfr523	2.11996	-4.49249	1.39978	-3.20942	0.00133005	0.00792416
ENSMUSG00000074575	Kcng1	65.9773	-4.56192	0.346918	-13.1498	1.70584e-39	7.41736e-37
ENSMUSG00000070985	Acnat1	5.13833	-4.56957	1.19306	-3.83014	0.00012807	0.00104721
ENSMUSG00000028386	Slc46a2	57.3272	-4.58117	0.550679	-8.31913	8.86077e-17	5.2849e-15
ENSMUSG00000052551	Adarb2	117.558	-4.61301	0.293096	-15.7389	8.18294e-56	8.17051e-53
ENSMUSG00000026354	Lct	39.0499	-4.61869	0.410248	-11.2583	2.10799e-29	4.14813e-27
ENSMUSG00000031886	Ces2e	47.4554	-4.63041	0.4647	-9.96432	2.18368e-23	2.58201e-21
ENSMUSG00000060161	Klk1b7-ps	2.4305	-4.69669	1.41768	-3.31293	0.000923229	0.00577479
ENSMUSG00000062760	Shisal1	46.7453	-4.71659	0.583733	-8.08005	6.47418e-16	3.50477e-14
ENSMUSG00000030230	Plcz1	3.85559	-4.74297	1.13724	-4.1706	3.038e-05	0.00029514
ENSMUSG00000065714	Gm25652	2.65556	-4.80836	1.11717	-4.30407	1.67689e-05	0.000172943
ENSMUSG00000060807	Serpina6	15.3344	-4.8685	0.981455	-4.96049	7.03156e-07	9.98756e-06
ENSMUSG00000024747	Aldh1a7	49.5035	-4.87724	0.396847	-12.29	1.02513e-34	3.29007e-32
ENSMUSG00000026407	Cacna1s	2.75913	-4.87906	1.10972	-4.39667	1.09925e-05	0.000117926
ENSMUSG00000113073	Gm48261	40.8779	-4.90578	0.455902	-10.7606	5.28242e-27	8.52747e-25
ENSMUSG00000021336	Slc17a4	157.709	-5.03552	0.523229	-9.62395	6.33528e-22	6.56895e-20
ENSMUSG00000113742	Gm48262	3.22088	-5.08975	1.06526	-4.77793	1.77108e-06	2.32118e-05
ENSMUSG00000040405	Havcr1	1164.51	-5.13267	0.789765	-6.49899	8.08636e-11	2.28751e-09
ENSMUSG00000113605	4930425K24Rik	3.46958	-5.2038	1.03056	-5.04948	4.43023e-07	6.59132e-06
ENSMUSG00000113810	Gm48259	8.19587	-5.25205	0.983112	-5.34227	9.17905e-08	1.56322e-06
ENSMUSG00000062151	Unc13c	5.57688	-5.28737	1.00447	-5.26385	1.41072e-07	2.31196e-06
ENSMUSG00000038071	Npy6r	41.2511	-5.29637	0.523468	-10.1178	4.60439e-24	5.77348e-22
ENSMUSG00000078307	AI593442	45.9619	-5.30917	0.584699	-9.08016	1.08413e-19	9.16206e-18
ENSMUSG00000027524	Edn3	13.7778	-5.46977	0.89229	-6.13004	8.78594e-10	2.13195e-08
ENSMUSG00000028307	Aldob	7.30123	-5.68312	1.01579	-5.59477	2.20915e-08	4.26318e-07
ENSMUSG00000084965	Gm13857	7.77248	-5.77926	1.11976	-5.16118	2.45394e-07	3.8485e-06
ENSMUSG00000021335	Slc17a1	9.48329	-6.06892	1.13826	-5.33174	9.72747e-08	1.64622e-06
ENSMUSG00000110497	9230110F11Rik	10.5157	-6.21728	1.0175	-6.11037	9.93991e-10	2.38982e-08
ENSMUSG00000025582	Nptx1	774.771	-6.29904	0.422944	-14.8933	3.64189e-50	2.80519e-47
ENSMUSG00000116307	Gm49490	8.01057	-6.40471	0.98507	-6.50178	7.93752e-11	2.25013e-09
ENSMUSG00000050164	Mchr1	147.703	-8.17398	0.656447	-12.4518	1.36641e-35	4.66291e-33
ENSMUSG00000055609	Hba-x	32.3485	-8.42705	1.04413	-8.07085	6.98092e-16	3.75646e-14
ENSMUSG00000052187	Hbb-y	276.484	-11.5205	1.25353	-9.19047	3.91143e-20	3.41257e-18

## Sheet: Upregulated genes LAB vs D15
DESeq2 mm10 Labour vs. D15 RNA-seq (n=5)
Significantly upregulated genes in LAB vs D15 (log2FC >= 2, padj < 0.01)
geneid	gene_name	baseMean	log2FoldChange	lfcSE	stat	pvalue	padj
ENSMUSG00000030093	Wnt7a	104.555	9.04171	0.957887	9.43923	3.75528e-21	3.64168e-19
ENSMUSG00000035186	Ubd	216.709	8.99767	2.35086	3.82739	0.00012951	0.00105641
ENSMUSG00000045027	Prss22	64.5492	8.92742	0.967722	9.22519	2.83062e-20	2.51022e-18
ENSMUSG00000048992	Prss32	37.5216	8.72355	1.07526	8.113	4.93835e-16	2.71147e-14
ENSMUSG00000061144	Spink12	29.7268	8.38378	1.02107	8.21082	2.19679e-16	1.25739e-14
ENSMUSG00000050635	Sprr2f	1631.38	8.15757	0.577589	14.1235	2.72223e-45	1.70671e-42
ENSMUSG00000026220	Slc16a14	530.197	7.96837	0.511864	15.5674	1.21305e-54	1.16795e-51
ENSMUSG00000073399	Trim40	16.6261	7.55011	1.13752	6.63734	3.19394e-11	9.65307e-10
ENSMUSG00000031364	Grpr	30.6543	7.26586	1.02926	7.05933	1.67301e-12	6.05406e-11
ENSMUSG00000044165	Bcl2l15	71.181	7.20162	0.815229	8.83386	1.01121e-18	7.61489e-17
ENSMUSG00000035429	Ptprh	28.8203	7.17952	1.02002	7.03858	1.94212e-12	6.96245e-11
ENSMUSG00000079620	Muc4	3126.68	7.1525	0.542304	13.1891	1.01388e-39	4.48086e-37
ENSMUSG00000032758	Kap	10642.9	7.04958	0.65772	10.7182	8.36057e-27	1.34162e-24
ENSMUSG00000018907	Alox12e	207.545	6.98899	0.563984	12.3922	2.88128e-35	9.70956e-33
ENSMUSG00000042845	Wfdc12	11.2635	6.97837	0.965307	7.22917	4.85969e-13	1.88236e-11
ENSMUSG00000103385	Gm37752	10.7154	6.9188	1.10792	6.24483	4.24267e-10	1.07397e-08
ENSMUSG00000035775	Krt20	155.918	6.89634	0.731784	9.42402	4.34154e-21	4.18013e-19
ENSMUSG00000114404	Gm40915	20.4511	6.67806	0.998765	6.68632	2.28857e-11	7.04309e-10
ENSMUSG00000030155	Clec2e	79.0995	6.66904	0.554619	12.0245	2.6406e-33	7.65461e-31
ENSMUSG00000022126	Acod1	349.581	6.59019	1.4501	4.54463	5.5032e-06	6.35923e-05
ENSMUSG00000106609	Gm43181	18.9789	6.57036	1.97636	3.32447	0.000885859	0.0055851
ENSMUSG00000068536	Doxl2	12.0176	6.49231	1.14805	5.65506	1.55795e-08	3.09511e-07
ENSMUSG00000109446	Gm9195	11.9304	6.47971	0.960284	6.74771	1.50201e-11	4.70846e-10
ENSMUSG00000074445	Sprr2a3	11.7955	6.46775	1.06783	6.05693	1.38742e-09	3.25814e-08
ENSMUSG00000032226	Gcnt3	42.4813	6.45632	0.701246	9.20692	3.35622e-20	2.93767e-18
ENSMUSG00000114355	Gm40916	10.5443	6.29865	1.03202	6.10323	1.03946e-09	2.48429e-08
ENSMUSG00000042212	Sprr2d	6.49151	6.19583	1.32297	4.68328	2.82323e-06	3.51392e-05
ENSMUSG00000050092	Sprr2b	6.3972	6.17854	1.08865	5.67542	1.38347e-08	2.78128e-07
ENSMUSG00000058260	Serpina9	34.2981	6.14932	0.829792	7.41067	1.25662e-13	5.19589e-12
ENSMUSG00000056632	Dsg3	31.2369	6.00369	0.737063	8.14543	3.77926e-16	2.12704e-14
ENSMUSG00000031551	Ido1	115.861	5.98853	1.80356	3.3204	0.000898876	0.00565057
ENSMUSG00000021347	Prl7b1	30.4314	5.9418	0.863991	6.87715	6.10599e-12	2.0173e-10
ENSMUSG00000102488	Gm37920	5.49884	5.93773	1.06394	5.58087	2.39324e-08	4.58559e-07
ENSMUSG00000040264	Gbp2b	282.717	5.91277	1.53625	3.84882	0.000118686	0.000981894
ENSMUSG00000029272	Sult1e1	7.83207	5.86182	1.00919	5.80842	6.30643e-09	1.33936e-07
ENSMUSG00000022886	Prl2a1	66.2548	5.83459	0.651003	8.96246	3.17527e-19	2.56931e-17
ENSMUSG00000061259	Tmprss11d	33.3269	5.82948	0.676644	8.61527	6.97752e-18	4.75018e-16
ENSMUSG00000086324	Gm15564	686.048	5.81558	1.31282	4.42982	9.43104e-06	0.000103565
ENSMUSG00000111002	Gm47674	4.9105	5.78569	1.02792	5.62855	1.81734e-08	3.55284e-07
ENSMUSG00000064246	Chil1	252.092	5.75724	1.28086	4.49482	6.96302e-06	7.8674e-05
ENSMUSG00000060188	Cxcl17	797.452	5.7127	0.261721	21.8274	1.27332e-105	1.14424e-101
ENSMUSG00000054976	Nyap2	15.4917	5.71041	0.870096	6.56296	5.27492e-11	1.54741e-09
ENSMUSG00000042064	Myo3b	123.188	5.70629	0.357471	15.9629	2.31575e-57	2.67437e-54
ENSMUSG00000113211	4921525O09Rik	4.55202	5.67227	1.06275	5.33737	9.43028e-08	1.59894e-06
ENSMUSG00000024245	Tmem178	34.318	5.64796	0.661963	8.53214	1.43661e-17	9.42324e-16
ENSMUSG00000107623	Gm10415	6.38472	5.55882	1.14518	4.85412	1.20924e-06	1.64479e-05
ENSMUSG00000115326	Gm35019	62.6838	5.51303	0.437939	12.5886	2.44047e-36	9.01269e-34
ENSMUSG00000035861	Tmprss11b	22.3082	5.50745	0.735338	7.48969	6.90387e-14	2.95901e-12
ENSMUSG00000087461	C230014O12Rik	4.00975	5.49122	1.0669	5.14687	2.6487e-07	4.12515e-06
ENSMUSG00000087677	Gm15226	13.3488	5.487	0.88039	6.23246	4.59155e-10	1.15255e-08
ENSMUSG00000021961	4930578I06Rik	3.94866	5.45596	1.10962	4.91695	8.79039e-07	1.22534e-05
ENSMUSG00000105239	Gm43091	5.53561	5.34141	1.06634	5.0091	5.46865e-07	7.92967e-06
ENSMUSG00000024365	Cyp21a1	35.9047	5.33616	0.549975	9.70256	2.94026e-22	3.13306e-20
ENSMUSG00000076846	Trav13-2	3.56172	5.32555	1.06165	5.01629	5.26785e-07	7.6807e-06
ENSMUSG00000049719	Prss46	5.30575	5.30299	1.03694	5.11406	3.15313e-07	4.82984e-06
ENSMUSG00000075316	Scn9a	3.41246	5.24729	1.1683	4.49138	7.07628e-06	7.97865e-05
ENSMUSG00000019987	Arg1	336.986	5.1555	0.621266	8.29837	1.0555e-16	6.24021e-15
ENSMUSG00000032496	Ltf	17652	5.13909	0.359115	14.3104	1.88348e-46	1.20897e-43
ENSMUSG00000027871	Hsd3b1	10.5528	5.13113	1.31425	3.90422	9.45286e-05	0.000807221
ENSMUSG00000110887	Cbx3-ps8	43.457	5.12973	1.41369	3.62862	0.000284943	0.00208234
ENSMUSG00000058427	Cxcl2	33.7853	5.11448	1.09486	4.67136	2.99216e-06	3.69687e-05
ENSMUSG00000062310	Glrp1	6.99328	5.10929	1.05497	4.84308	1.2784e-06	1.72754e-05
ENSMUSG00000029867	Llcfc1	4.65827	5.09918	1.08392	4.70437	2.54646e-06	3.21095e-05
ENSMUSG00000018623	Mmp7	1322.48	5.08321	0.84061	6.04704	1.47528e-09	3.44945e-08
ENSMUSG00000046203	Sprr2g	13.2537	5.06691	0.815939	6.20991	5.30147e-10	1.32213e-08
ENSMUSG00000044912	Syt16	46.7586	5.05509	0.488456	10.3491	4.22329e-25	5.86885e-23
ENSMUSG00000102029	Gm29530	2.92062	5.0262	1.09379	4.59521	4.32303e-06	5.12059e-05
ENSMUSG00000033187	BC016579	12.7423	5.00193	0.780758	6.4065	1.48897e-10	4.05877e-09
ENSMUSG00000096576	Oog1	2.7671	4.97189	1.1739	4.23536	2.28188e-05	0.000228434
ENSMUSG00000074892	B3galt5	30.984	4.96829	0.500987	9.91701	3.51119e-23	4.06259e-21
ENSMUSG00000022755	Adgrg7	49.7807	4.96174	0.580481	8.54764	1.25629e-17	8.32144e-16
ENSMUSG00000036813	Entpd8	9.21216	4.95624	0.926548	5.34915	8.8369e-08	1.50972e-06
ENSMUSG00000113593	Zp4-ps	2.79607	4.95455	1.17382	4.22088	2.43349e-05	0.00024137
ENSMUSG00000034159	2310007B03Rik	30.5045	4.95169	0.552684	8.95936	3.26577e-19	2.6203e-17
ENSMUSG00000113940	Gm40477	2.7206	4.94289	1.07494	4.59828	4.25997e-06	5.057e-05
ENSMUSG00000016349	Eef1a2	15.222	4.93055	0.692662	7.11826	1.09297e-12	4.03084e-11
ENSMUSG00000079029	Gm5662	2.65923	4.91506	1.20982	4.06265	4.85189e-05	0.000449029
ENSMUSG00000045731	Pnoc	43.8415	4.90177	0.641824	7.63725	2.21917e-14	1.00718e-12
ENSMUSG00000105806	Gm43345	2.59628	4.85721	1.08699	4.46848	7.87772e-06	8.7831e-05
ENSMUSG00000026984	Il1f6	37.2458	4.84148	0.699634	6.92002	4.51565e-12	1.52362e-10
ENSMUSG00000103187	Gm37087	3.86393	4.83498	1.10112	4.39098	1.12843e-05	0.000120816
ENSMUSG00000029417	Cxcl9	733.123	4.81258	1.3258	3.62994	0.000283491	0.00207438
ENSMUSG00000115093	Gm8047	5.76822	4.81129	1.0143	4.74345	2.10106e-06	2.7024e-05
ENSMUSG00000043592	Unc5cl	248.793	4.80678	0.33119	14.5137	9.92681e-48	6.69042e-45
ENSMUSG00000062551	Prl2c1	3.83535	4.80305	1.18381	4.05728	4.9648e-05	0.000458534
ENSMUSG00000085533	Gm12146	5.72026	4.79061	1.01302	4.72903	2.25595e-06	2.87828e-05
ENSMUSG00000110520	Gm45776	10.8861	4.76889	0.792244	6.01947	1.74988e-09	4.0286e-08
ENSMUSG00000025329	Padi1	2326.53	4.72908	0.367919	12.8536	8.21205e-38	3.25572e-35
ENSMUSG00000000983	Wfdc18	70.136	4.7181	0.553842	8.51885	1.61145e-17	1.03931e-15
ENSMUSG00000056071	S100a9	93.2497	4.71114	1.38774	3.39482	0.000686739	0.00447085
ENSMUSG00000090588	Gm9573	3.47229	4.67057	1.12951	4.13505	3.54873e-05	0.000338549
ENSMUSG00000109366	Gm44698	3.46364	4.66713	1.07074	4.3588	1.30776e-05	0.000138096
ENSMUSG00000028699	Tspan1	410.969	4.66243	0.179544	25.9682	1.13162e-148	3.05073e-144
ENSMUSG00000098370	Gm19541	5.21571	4.64908	1.0075	4.61446	3.94109e-06	4.72844e-05
ENSMUSG00000073821	8030451A03Rik	101.56	4.60564	0.3092	14.8953	3.53463e-50	2.80265e-47
ENSMUSG00000087470	A630031M04Rik	3.28759	4.57946	1.09896	4.16709	3.08512e-05	0.000299287
ENSMUSG00000034117	Ptgdr2	78.9509	4.57812	0.380625	12.0279	2.53481e-33	7.42783e-31
ENSMUSG00000051723	Rpl31-ps13	4.92158	4.56401	1.06338	4.292	1.77071e-05	0.000181438
ENSMUSG00000048031	Fcrl5	3.203	4.55972	1.08415	4.20581	2.60153e-05	0.000256198
ENSMUSG00000094559	Cyp2d34	2.11624	4.55625	1.20345	3.786	0.00015309	0.00122215
ENSMUSG00000026420	Il24	101.162	4.55341	0.528144	8.62153	6.60638e-18	4.52034e-16
ENSMUSG00000037578	Pkd2l1	2.09119	4.54421	1.20302	3.77733	0.000158516	0.00125875
ENSMUSG00000056054	S100a8	61.4481	4.54309	1.3813	3.28898	0.0010055	0.00621157
ENSMUSG00000022382	Wnt7b	121.625	4.53779	0.274141	16.5527	1.52989e-61	2.42614e-58
ENSMUSG00000042367	Gjb3	13.844	4.52263	0.719983	6.28158	3.35154e-10	8.62983e-09
ENSMUSG00000113909	Gm36377	18.461	4.51721	0.663588	6.80725	9.94821e-12	3.1852e-10
ENSMUSG00000040152	Thbs1	34514.1	4.51287	0.23997	18.8059	6.75038e-79	1.81983e-75
ENSMUSG00000027403	Tgm6	3.14732	4.50666	1.16166	3.87949	0.000104677	0.000880496
ENSMUSG00000083819	Gm11977	1.98277	4.49364	1.17618	3.82053	0.000133164	0.00108164
ENSMUSG00000101859	Gm29233	3.05951	4.48137	1.04978	4.26887	1.96467e-05	0.00019882
ENSMUSG00000114718	Gm47753	33.8273	4.47841	0.538586	8.31514	9.16468e-17	5.4541e-15
ENSMUSG00000097373	Gm26877	46.1489	4.4529	0.374328	11.8957	1.24565e-32	3.42669e-30
ENSMUSG00000046049	Rp1l1	1.9536	4.43401	1.27821	3.46893	0.000522537	0.00352618
ENSMUSG00000111207	Gm8125	1.90078	4.42912	1.14617	3.86429	0.000111412	0.000929027
ENSMUSG00000049112	Oxtr	3187.89	4.41647	0.201086	21.9631	6.49552e-107	8.75564e-103
ENSMUSG00000047104	Pbp2	19.5713	4.40848	0.637137	6.9192	4.54193e-12	1.52866e-10
ENSMUSG00000053675	Tgm5	6.4262	4.40398	0.939134	4.68941	2.73994e-06	3.42766e-05
ENSMUSG00000116542	Gm17783	1.89661	4.40109	1.23622	3.56012	0.000370682	0.0026174
ENSMUSG00000032487	Ptgs2	461.574	4.39645	0.262529	16.7466	5.99988e-63	1.01094e-59
ENSMUSG00000030142	Clec4e	94.6646	4.38337	1.16297	3.76912	0.000163824	0.00129214
ENSMUSG00000100596	Gm29502	1.86436	4.38277	1.20304	3.64306	0.000269412	0.00198391
ENSMUSG00000026971	Itgb6	332.574	4.38209	0.354824	12.35	4.86928e-35	1.62063e-32
ENSMUSG00000029371	Cxcl5	89.3337	4.3521	1.04582	4.16143	3.16265e-05	0.000305927
ENSMUSG00000066027	Gm10436	1.80222	4.34949	1.23654	3.51747	0.000435676	0.00300855
ENSMUSG00000114697	Gm30806	2.78585	4.34694	1.12539	3.8626	0.000112188	0.000934919
ENSMUSG00000058354	Krt6a	4.20308	4.33641	1.02725	4.22137	2.42822e-05	0.000241025
ENSMUSG00000089708	5330439A09Rik	2.73344	4.31611	1.06487	4.05319	5.05236e-05	0.000465505
ENSMUSG00000095799	Gm8332	1.75241	4.31606	1.37682	3.1348	0.00171974	0.00983504
ENSMUSG00000013653	1810065E05Rik	4.13888	4.31552	1.1598	3.7209	0.000198514	0.00152864
ENSMUSG00000098333	Gm27158	1.74556	4.29222	1.2186	3.52225	0.000427904	0.00296095
ENSMUSG00000048764	Tmprss11f	1.74	4.28908	1.25058	3.42967	0.000604307	0.00400086
ENSMUSG00000046133	C130073F10Rik	2.69673	4.27995	1.32926	3.21981	0.00128275	0.00768653
ENSMUSG00000088104	Gm22380	5.87421	4.27199	0.937112	4.55868	5.14768e-06	5.98948e-05
ENSMUSG00000044103	Il1f9	62.7394	4.26403	0.779004	5.47369	4.40767e-08	8.02881e-07
ENSMUSG00000112290	Gm33782	2.60197	4.24957	1.12537	3.77615	0.000159272	0.00126363
ENSMUSG00000050747	Trim15	194.228	4.23069	0.476885	8.87152	7.21542e-19	5.47945e-17
ENSMUSG00000043164	Tmem212	7.81939	4.22261	0.900982	4.68667	2.77681e-06	3.46414e-05
ENSMUSG00000020826	Nos2	124.313	4.219	1.26324	3.33983	0.000838283	0.00531373
ENSMUSG00000104937	Gm43057	16.7669	4.20373	0.545172	7.71083	1.24998e-14	5.9016e-13
ENSMUSG00000020912	Krt12	1.63909	4.20181	1.19268	3.523	0.000426695	0.0029541
ENSMUSG00000021509	Slc25a48	96.4233	4.192	0.454399	9.22539	2.82532e-20	2.51022e-18
ENSMUSG00000105941	Gm42809	1.60846	4.18475	1.20836	3.46317	0.000533854	0.00359265
ENSMUSG00000074001	Klhl40	5.52824	4.18187	0.971141	4.30614	1.66128e-05	0.000171678
ENSMUSG00000020651	Slc26a4	842.011	4.1742	0.40941	10.1956	2.07359e-24	2.72692e-22
ENSMUSG00000094732	1500015L24Rik	2.46949	4.15845	1.19663	3.47512	0.000510621	0.00345441
ENSMUSG00000054618	Gm9951	5.38792	4.14218	1.01026	4.10012	4.12937e-05	0.000389243
ENSMUSG00000104301	Wdr49	1.53547	4.10799	1.24273	3.30562	0.000947676	0.00590168
ENSMUSG00000112837	Gm48053	2.42146	4.10521	1.11408	3.68484	0.000228847	0.00172875
ENSMUSG00000050108	Bpifc	56.828	4.06619	0.499722	8.13691	4.05479e-16	2.27262e-14
ENSMUSG00000111376	Gm47099	3.54191	4.05751	1.11505	3.63886	0.000273853	0.00201221
ENSMUSG00000081778	Gm6325	27.3866	4.05491	0.590605	6.8657	6.61657e-12	2.18064e-10
ENSMUSG00000007682	Dio2	7593.27	4.05431	0.261549	15.5012	3.40737e-54	3.16756e-51
ENSMUSG00000075520	Malrd1	254.499	4.05176	0.419202	9.66541	4.22936e-22	4.43655e-20
ENSMUSG00000085969	Gm15600	4.96495	4.02754	0.938117	4.29322	1.76101e-05	0.000180583
ENSMUSG00000091618	H60c	122.421	4.02331	0.392423	10.2525	1.15341e-24	1.54701e-22
ENSMUSG00000085918	Gm13032	31.3064	4.01712	0.489948	8.19907	2.42254e-16	1.38367e-14
ENSMUSG00000101581	C430002N11Rik	62.8287	4.01643	0.341313	11.7676	5.73545e-32	1.48675e-29
ENSMUSG00000056078	Lipm	6.65145	4.01609	0.812083	4.94542	7.5979e-07	1.06794e-05
ENSMUSG00000050069	Grem2	118.996	4.01304	0.342123	11.7298	8.96562e-32	2.238e-29
ENSMUSG00000026413	Pkp1	5.04489	4.00404	0.95585	4.18898	2.80206e-05	0.000273699
ENSMUSG00000068740	Celsr2	430.684	3.98805	0.356808	11.177	5.28492e-29	1.01047e-26
ENSMUSG00000099205	Gm27944	2.17972	3.95499	1.149	3.44211	0.000577197	0.00384594
ENSMUSG00000099364	5730419F03Rik	11.2017	3.95474	0.612187	6.46001	1.04694e-10	2.90374e-09
ENSMUSG00000106361	Gm35066	2.12097	3.93828	1.12263	3.50808	0.000451351	0.00310722
ENSMUSG00000056328	Myh1	2.096	3.92255	1.22226	3.20925	0.00133082	0.00792645
ENSMUSG00000109846	Gm45627	4.71069	3.91804	0.987419	3.96796	7.24913e-05	0.000639285
ENSMUSG00000026822	Lcn2	15067.4	3.88572	0.433801	8.95739	3.32445e-19	2.65946e-17
ENSMUSG00000117019	AC165291.1	3.15253	3.87998	1.08921	3.56219	0.000367777	0.00259892
ENSMUSG00000021219	Rgs6	6.08071	3.87733	1.00192	3.86992	0.000108871	0.000908405
ENSMUSG00000074272	Ceacam1	2002.12	3.85933	0.221843	17.3967	8.73598e-68	1.81164e-64
ENSMUSG00000113303	4930423D22Rik	3.09426	3.8559	1.14986	3.35335	0.000798383	0.00509555
ENSMUSG00000022875	Kng1	154.317	3.84517	0.275477	13.9582	2.80438e-44	1.64355e-41
ENSMUSG00000022026	Olfm4	26.6548	3.83775	0.70642	5.43267	5.55166e-08	9.89207e-07
ENSMUSG00000021640	Naip1	1300.75	3.83613	0.634613	6.04483	1.49564e-09	3.47894e-08
ENSMUSG00000103421	Golt1a	3.04748	3.82628	1.07975	3.54366	0.000394609	0.0027596
ENSMUSG00000044938	Klhl31	7.153	3.8101	0.817111	4.6629	3.1179e-06	3.8294e-05
ENSMUSG00000003051	Elf3	1017.9	3.80588	0.360138	10.5678	4.20087e-26	6.39837e-24
ENSMUSG00000035818	Plekhs1	309.497	3.80278	0.292086	13.0194	9.49382e-39	3.99912e-36
ENSMUSG00000029868	Trpv6	912.916	3.80269	0.286204	13.2866	2.76715e-40	1.33214e-37
ENSMUSG00000035202	Lars2	24688.7	3.79646	1.02392	3.70777	0.000209096	0.00160006
ENSMUSG00000053783	1700016K19Rik	1.92387	3.79046	1.18571	3.19678	0.00138972	0.00820892
ENSMUSG00000107768	Gm44275	31.4189	3.78644	0.506486	7.47589	7.66839e-14	3.2505e-12
ENSMUSG00000114784	Gm47754	53.386	3.77381	0.50094	7.53345	4.94152e-14	2.15564e-12
ENSMUSG00000051397	Tacstd2	315.028	3.76366	0.421257	8.93434	4.09621e-19	3.21952e-17
ENSMUSG00000024771	Lipk	20.668	3.75743	0.550499	6.8255	8.76208e-12	2.82556e-10
ENSMUSG00000069372	Ctxn3	24.7935	3.75115	0.442525	8.4767	2.31665e-17	1.46952e-15
ENSMUSG00000029813	1600015I10Rik	2.81086	3.73575	1.11349	3.355	0.000793651	0.00507015
ENSMUSG00000045545	Krt14	8.35841	3.73512	0.827034	4.51628	6.29347e-06	7.18519e-05
ENSMUSG00000110123	Gm18562	1.87498	3.73329	1.18449	3.15181	0.0016226	0.00936092
ENSMUSG00000055415	Atp10b	977.092	3.72967	0.381877	9.76668	1.56503e-22	1.68766e-20
ENSMUSG00000102417	Gm36939	2.8003	3.72966	1.12702	3.3093	0.000935287	0.00583802
ENSMUSG00000086170	Gm12144	12.2025	3.71889	0.639002	5.81985	5.89016e-09	1.25926e-07
ENSMUSG00000113620	7420701I03Rik	2.79826	3.70316	1.11545	3.31988	0.000900567	0.00565798
ENSMUSG00000062296	Trank1	36.0695	3.6994	0.634925	5.82652	5.65944e-09	1.21379e-07
ENSMUSG00000082766	1700064H15Rik	6.66931	3.68904	0.809385	4.55782	5.16861e-06	6.01125e-05
ENSMUSG00000040694	Apobec2	52.1248	3.68191	0.351895	10.4631	1.27613e-25	1.89029e-23
ENSMUSG00000116814	AC154438.1	5.37998	3.67967	0.956673	3.84632	0.000119907	0.000990368
ENSMUSG00000044313	Mab21l3	165.474	3.67826	0.662517	5.55195	2.82502e-08	5.33705e-07
ENSMUSG00000021792	Fam213a	4325.75	3.6738	0.169355	21.6929	2.39276e-104	1.61266e-100
ENSMUSG00000042784	Muc1	1251.37	3.67132	0.286239	12.8261	1.17184e-37	4.5785e-35
ENSMUSG00000114828	AI463229	19.9711	3.66906	0.500583	7.32957	2.30887e-13	9.23512e-12
ENSMUSG00000041301	Cftr	793.471	3.65736	0.543996	6.72314	1.77854e-11	5.5367e-10
ENSMUSG00000047441	Antxrl	11.746	3.65621	0.626581	5.83517	5.37351e-09	1.15892e-07
ENSMUSG00000047501	Cldn4	269.141	3.64766	0.226196	16.1261	1.67174e-58	2.25343e-55
ENSMUSG00000060988	Galnt13	147.354	3.63449	0.44789	8.1147	4.86983e-16	2.6793e-14
ENSMUSG00000027398	Il1b	125.094	3.63117	1.09512	3.31579	0.000913859	0.00572548
ENSMUSG00000021345	Prl8a6	17.0211	3.63101	0.582003	6.23883	4.40867e-10	1.10974e-08
ENSMUSG00000018924	Alox15	194.221	3.62111	0.439231	8.24422	1.66241e-16	9.65881e-15
ENSMUSG00000036805	Noxa1	18.8211	3.62081	0.653167	5.54347	2.96539e-08	5.56127e-07
ENSMUSG00000098414	Mir6909	2.64199	3.61299	1.14334	3.16005	0.00157744	0.0091415
ENSMUSG00000104554	Gm4610	5.18348	3.60274	0.95111	3.78794	0.000151904	0.00121424
ENSMUSG00000087230	Mroh3	8.80625	3.5978	0.635152	5.66447	1.47483e-08	2.943e-07
ENSMUSG00000089851	Gm16579	18.3985	3.58879	0.617743	5.80952	6.26533e-09	1.33313e-07
ENSMUSG00000028786	Tmem54	40.687	3.57838	0.352494	10.1516	3.25999e-24	4.18505e-22
ENSMUSG00000026985	Il1f8	117.077	3.56672	0.456369	7.81544	5.47693e-15	2.69439e-13
ENSMUSG00000028255	Clca1	36.2735	3.55864	0.45524	7.81707	5.40675e-15	2.66473e-13
ENSMUSG00000038754	Elovl3	8.60625	3.55631	0.8248	4.31172	1.61991e-05	0.000167997
ENSMUSG00000063354	Slc39a4	592.973	3.5481	0.265219	13.378	8.12838e-41	4.05802e-38
ENSMUSG00000028804	Csmd2	94.0519	3.54109	0.387628	9.13529	6.52325e-20	5.63655e-18
ENSMUSG00000109705	Gm19096	3.64236	3.53466	1.12295	3.14764	0.00164593	0.00947726
ENSMUSG00000094194	Ighv5-16	5.96596	3.53067	0.900902	3.91903	8.89046e-05	0.000763062
ENSMUSG00000043659	Npsr1	14.4141	3.52372	0.502614	7.01079	2.36982e-12	8.37325e-11
ENSMUSG00000079092	Prl2c2	5.89514	3.50847	0.923663	3.79843	0.000145616	0.0011687
ENSMUSG00000095493	A630023A22Rik	8.22058	3.49499	0.665337	5.25295	1.4968e-07	2.43525e-06
ENSMUSG00000025279	Dnase1l3	26.2918	3.47894	0.809394	4.2982	1.72189e-05	0.000176974
ENSMUSG00000000901	Mmp11	935.891	3.47591	0.288804	12.0355	2.31155e-33	6.84802e-31
ENSMUSG00000115411	Gm6986	3.4238	3.46575	1.02676	3.37544	0.000736987	0.00475777
ENSMUSG00000042268	Slc26a9	4.70446	3.46293	0.952291	3.63642	0.000276454	0.00202892
ENSMUSG00000087389	Gm15592	28.0772	3.45867	0.586393	5.89821	3.67468e-09	8.08041e-08
ENSMUSG00000021097	Clmn	498.383	3.44712	0.656567	5.25021	1.51922e-07	2.46876e-06
ENSMUSG00000059334	Zfp36l3	3.38332	3.4362	1.03119	3.33227	0.000861405	0.00544441
ENSMUSG00000022123	Scel	118.784	3.43234	0.796935	4.30692	1.65543e-05	0.000171254
ENSMUSG00000100782	Gm28231	10.2971	3.42902	0.570964	6.00566	1.90549e-09	4.34972e-08
ENSMUSG00000022938	Fam3b	9.20832	3.41409	0.740904	4.60801	4.06538e-06	4.8495e-05
ENSMUSG00000029847	Slc23a4	78.5535	3.40415	0.42472	8.01504	1.10098e-15	5.76339e-14
ENSMUSG00000070960	Gm19680	3.29734	3.39785	1.02959	3.30019	0.00096621	0.00600878
ENSMUSG00000031844	Hsd17b2	47.2626	3.38638	0.293775	11.5271	9.63102e-31	2.07714e-28
ENSMUSG00000045364	Ifne	47.7209	3.3654	0.33237	10.1255	4.2598e-24	5.36635e-22
ENSMUSG00000035491	Fthl17a	3.24262	3.36373	1.0417	3.22907	0.00124192	0.00747506
ENSMUSG00000093862	Gm5117	3.23904	3.36093	1.07032	3.1401	0.00168889	0.00967712
ENSMUSG00000050359	Sprr1a	36.2296	3.3604	0.529715	6.34379	2.24185e-10	5.91369e-09
ENSMUSG00000100155	Gm2109	10.128	3.35783	1.02892	3.26346	0.00110061	0.00673431
ENSMUSG00000103354	Gm38083	5.44784	3.3479	0.756607	4.42489	9.6491e-06	0.000105658
ENSMUSG00000078605	E030025P04Rik	16.1763	3.34109	0.472518	7.07083	1.54015e-12	5.59581e-11
ENSMUSG00000086962	Gm12248	131.759	3.32838	0.379074	8.7803	1.63043e-18	1.20424e-16
ENSMUSG00000111422	1700027J07Rik	14.5811	3.31941	0.646497	5.13445	2.82969e-07	4.3792e-06
ENSMUSG00000010601	Apol7a	105.038	3.31834	0.493044	6.73031	1.69297e-11	5.28863e-10
ENSMUSG00000026241	Nppc	63.1599	3.29538	0.282446	11.6673	1.87255e-31	4.46744e-29
ENSMUSG00000032500	Dclk3	71.4467	3.29212	0.816765	4.03068	5.56157e-05	0.000506535
ENSMUSG00000043727	F830045P16Rik	9.37102	3.2838	0.585711	5.60652	2.06432e-08	4.00661e-07
ENSMUSG00000014725	Adam28	136.356	3.27626	0.382435	8.56685	1.06356e-17	7.09718e-16
ENSMUSG00000033213	AA467197	78.109	3.25413	0.986822	3.29759	0.000975195	0.00605349
ENSMUSG00000019232	Etnppl	116.938	3.24943	0.993746	3.26988	0.00107593	0.00660125
ENSMUSG00000022824	Muc13	21.3572	3.24665	0.610497	5.31805	1.04883e-07	1.7606e-06
ENSMUSG00000028262	Clca3a2	25.0269	3.22698	0.47391	6.80927	9.80933e-12	3.14821e-10
ENSMUSG00000117465	AC102496.1	136.355	3.22625	0.490202	6.58147	4.65817e-11	1.37246e-09
ENSMUSG00000080767	Gm15595	6.05474	3.21889	0.7995	4.02613	5.6703e-05	0.000514526
ENSMUSG00000038415	Foxq1	12.7719	3.21586	0.552533	5.8202	5.87761e-09	1.25758e-07
ENSMUSG00000109915	7420700N18Rik	4.09357	3.19818	1.00388	3.18582	0.00144343	0.00848343
ENSMUSG00000036899	Trpv5	17.471	3.19104	0.475951	6.70456	2.02018e-11	6.26e-10
ENSMUSG00000085451	Gm40614	3.91561	3.17633	0.968025	3.28125	0.0010335	0.00636556
ENSMUSG00000026285	Pdcd1	8.62773	3.1743	0.895315	3.54546	0.000391932	0.00274495
ENSMUSG00000113224	Gm48444	10.7619	3.15883	0.547296	5.77171	7.84713e-09	1.6336e-07
ENSMUSG00000027356	Fermt1	680.269	3.15392	0.315058	10.0106	1.36903e-23	1.64767e-21
ENSMUSG00000037716	Ccdc33	4.74992	3.14894	0.871445	3.61347	0.000302131	0.00218956
ENSMUSG00000026639	Lamb3	386.156	3.14842	0.365157	8.62211	6.57318e-18	4.52034e-16
ENSMUSG00000037411	Serpine1	1793.2	3.14766	0.264167	11.9154	9.83673e-33	2.7339e-30
ENSMUSG00000026180	Cxcr2	27.3528	3.14398	0.806708	3.8973	9.72709e-05	0.000826972
ENSMUSG00000086187	Gm12860	14.9468	3.11527	0.510515	6.1022	1.04617e-09	2.49589e-08
ENSMUSG00000032357	Tinag	46.4556	3.10914	0.391977	7.93195	2.15735e-15	1.09529e-13
ENSMUSG00000063727	Tnfrsf11b	1706.66	3.10357	0.196959	15.7574	6.10616e-56	6.33138e-53
ENSMUSG00000042734	Ttc9	319.86	3.09811	0.15602	19.8572	9.55406e-88	4.2928e-84
ENSMUSG00000025068	Gsto1	6579.95	3.09381	0.283178	10.9253	8.72485e-28	1.53734e-25
ENSMUSG00000019997	Ctgf	4938.75	3.08894	0.26579	11.6217	3.19641e-31	7.30271e-29
ENSMUSG00000007908	Hmgcll1	45.6796	3.08804	0.289449	10.6687	1.42614e-26	2.24839e-24
ENSMUSG00000074489	Bglap3	10.1805	3.08457	0.593126	5.20053	1.98719e-07	3.16999e-06
ENSMUSG00000105703	Gm43305	322.099	3.08038	0.583351	5.28049	1.28837e-07	2.12695e-06
ENSMUSG00000085477	Gm13335	6.15377	3.07107	0.822453	3.73403	0.000188437	0.00146021
ENSMUSG00000094230	Gm21847	10.9881	3.05525	0.58072	5.26115	1.43159e-07	2.34047e-06
ENSMUSG00000025746	Il6	10.75	3.05377	0.707872	4.31402	1.60314e-05	0.000166355
ENSMUSG00000106707	Gm43748	5.37039	3.04403	0.885631	3.43713	0.000587908	0.00390572
ENSMUSG00000027902	Chil6	20.4547	3.03627	0.534349	5.68219	1.32979e-08	2.67937e-07
ENSMUSG00000000544	Gpa33	9.6149	3.03228	0.676527	4.48212	7.39041e-06	8.27744e-05
ENSMUSG00000113796	Gm36426	8.80481	3.02962	0.645845	4.69094	2.7195e-06	3.40683e-05
ENSMUSG00000086999	Bcas1os2	4.46013	3.02461	0.795853	3.80046	0.000144428	0.0011609
ENSMUSG00000112106	Gm47026	36.4011	3.01908	0.489457	6.16823	6.90585e-10	1.70023e-08
ENSMUSG00000063522	2010109I03Rik	21.279	3.0006	0.651041	4.60893	4.04748e-06	4.83028e-05
ENSMUSG00000053338	Tarm1	22.385	2.99632	0.773524	3.87359	0.000107242	0.000897036
ENSMUSG00000085290	Gm16129	11.1735	2.99149	0.563617	5.30767	1.11036e-07	1.85237e-06
ENSMUSG00000039364	Sectm1b	74.4382	2.98165	0.923906	3.22723	0.00124997	0.00751605
ENSMUSG00000024063	Lbh	1550.28	2.97075	0.199767	14.8711	5.08051e-50	3.80459e-47
ENSMUSG00000075225	Ccdc162	130.955	2.96024	0.452954	6.53542	6.34309e-11	1.83283e-09
ENSMUSG00000025328	Padi3	6.77328	2.95566	0.851418	3.47146	0.000517646	0.00349667
ENSMUSG00000086443	4933421A08Rik	5.09848	2.95023	0.713299	4.13604	3.53349e-05	0.00033732
ENSMUSG00000041324	Inhba	1184.5	2.94557	0.306959	9.59597	8.31315e-22	8.55397e-20
ENSMUSG00000021348	Prl7d1	7.58563	2.92802	0.884207	3.31146	0.000928109	0.00579993
ENSMUSG00000096035	Odaph	64.8893	2.92697	0.264673	11.0588	1.98646e-28	3.71896e-26
ENSMUSG00000086932	Gm22000	7.46726	2.92441	0.581212	5.03156	4.86501e-07	7.1709e-06
ENSMUSG00000112854	Gm38403	27.3298	2.92083	0.335438	8.70749	3.10681e-18	2.19258e-16
ENSMUSG00000040808	S100g	1530.22	2.91837	0.390224	7.47872	7.50499e-14	3.19128e-12
ENSMUSG00000040569	Slc26a7	57.5851	2.91113	0.29683	9.8074	1.04628e-22	1.15601e-20
ENSMUSG00000062991	Nrg1	1515.32	2.90876	0.196466	14.8054	1.3519e-49	9.85024e-47
ENSMUSG00000075611	Gm11545	8.0563	2.90743	0.640856	4.53679	5.71157e-06	6.58122e-05
ENSMUSG00000116395	Gm49499	4.9029	2.89962	0.730482	3.96946	7.20363e-05	0.000636008
ENSMUSG00000026981	Il1rn	77.795	2.897	0.76686	3.77774	0.000158261	0.00125746
ENSMUSG00000050157	Gm867	8.92645	2.89681	0.603603	4.7992	1.59299e-06	2.10105e-05
ENSMUSG00000074465	Gm10701	38.4123	2.89506	0.299949	9.65184	4.8281e-22	5.04499e-20
ENSMUSG00000101304	Plet1os	43.7119	2.89226	0.413755	6.99027	2.74358e-12	9.60573e-11
ENSMUSG00000025930	Msc	122.573	2.8907	0.251225	11.5064	1.2244e-30	2.59909e-28
ENSMUSG00000049420	Tmem200a	232.852	2.89067	0.307212	9.40937	4.99141e-21	4.77175e-19
ENSMUSG00000096878	Gm21083	10.4948	2.8875	0.546624	5.28243	1.2748e-07	2.10584e-06
ENSMUSG00000104365	4930470B04Rik	10.7932	2.88583	0.695244	4.15082	3.31287e-05	0.00031891
ENSMUSG00000033508	Asprv1	14.0944	2.87019	0.671135	4.27662	1.89749e-05	0.000192672
ENSMUSG00000085418	Grip1os1	13.5454	2.86654	0.531249	5.39585	6.81982e-08	1.19309e-06
ENSMUSG00000097923	Gm26577	13.2406	2.85528	0.694943	4.10866	3.97966e-05	0.000376977
ENSMUSG00000047641	Krt87	94.1361	2.83129	0.243507	11.6271	2.99968e-31	6.91182e-29
ENSMUSG00000070661	Rnf186	14.4164	2.8269	0.740732	3.81637	0.000135432	0.00109808
ENSMUSG00000030651	Art2b	10.9383	2.82088	0.873356	3.22993	0.00123819	0.00745766
ENSMUSG00000098207	Arl14	5.38381	2.82051	0.742074	3.80085	0.000144199	0.00115975
ENSMUSG00000055976	Cldn23	54.9635	2.8178	0.467053	6.03315	1.60796e-09	3.72093e-08
ENSMUSG00000075217	4833423E24Rik	347.357	2.80022	0.175625	15.9443	3.12054e-57	3.36507e-54
ENSMUSG00000116812	AC183097.2	5.3139	2.80017	0.675955	4.14255	3.43473e-05	0.000329058
ENSMUSG00000021101	4930408O17Rik	6.83212	2.79965	0.888139	3.15227	0.00162008	0.00934856
ENSMUSG00000086775	Snhg7os	19.7586	2.79574	0.386975	7.2246	5.02589e-13	1.94116e-11
ENSMUSG00000076441	Ass1	247.832	2.79572	0.327288	8.54209	1.3182e-17	8.66767e-16
ENSMUSG00000039384	Dusp10	278.217	2.79363	0.171866	16.2547	2.06896e-59	2.93564e-56
ENSMUSG00000112737	Gm4898	4.53948	2.79079	0.806041	3.46235	0.00053549	0.00360007
ENSMUSG00000031958	Ldhd	565.009	2.78524	0.310671	8.96526	3.0955e-19	2.5136e-17
ENSMUSG00000049093	Il23r	14.3668	2.78291	0.496388	5.60631	2.06688e-08	4.00871e-07
ENSMUSG00000072244	Trim6	103.725	2.78013	0.233015	11.9312	8.14384e-33	2.28698e-30
ENSMUSG00000103067	Gm30414	61.2757	2.76882	0.418531	6.61558	3.70087e-11	1.10857e-09
ENSMUSG00000083428	Gm14591	6.03223	2.76508	0.658528	4.19888	2.68237e-05	0.000263535
ENSMUSG00000102574	Gm33206	4.49481	2.7476	0.806826	3.40544	0.000660576	0.00431892
ENSMUSG00000000567	Sox9	233.582	2.74605	0.344845	7.96314	1.67732e-15	8.66264e-14
ENSMUSG00000073012	Fnd3c2	13.2777	2.74345	0.564862	4.85685	1.19267e-06	1.62554e-05
ENSMUSG00000112555	Gm47027	34.7636	2.73572	0.48105	5.68698	1.29308e-08	2.6092e-07
ENSMUSG00000035638	Muc20	215.89	2.73053	0.599763	4.55269	5.29654e-06	6.13883e-05
ENSMUSG00000045761	Togaram2	5.06685	2.72986	0.721582	3.78316	0.000154851	0.00123473
ENSMUSG00000034917	Tjp3	405.099	2.71285	0.325662	8.33027	8.06605e-17	4.84304e-15
ENSMUSG00000045502	Hcar2	22.4051	2.71188	0.563921	4.80897	1.51706e-06	2.01272e-05
ENSMUSG00000107546	Gm20560	3.68014	2.70888	0.815836	3.32037	0.000898968	0.00565057
ENSMUSG00000031098	Syt8	12.4189	2.70782	0.450645	6.00877	1.86936e-09	4.27448e-08
ENSMUSG00000063060	Sox7	241.543	2.70764	0.297327	9.10661	8.49937e-20	7.25109e-18
ENSMUSG00000022900	Ildr1	287.989	2.7056	0.371925	7.27459	3.47465e-13	1.3655e-11
ENSMUSG00000054258	Gm5082	4.40802	2.70364	0.738487	3.66105	0.000251181	0.00186843
ENSMUSG00000090254	Gm1965	8.89165	2.70239	0.598441	4.51571	6.31058e-06	7.19961e-05
ENSMUSG00000046623	Gjb4	12.2735	2.69961	0.481413	5.60768	2.05061e-08	3.98288e-07
ENSMUSG00000038591	Colec10	5.06525	2.69694	0.717439	3.75912	0.000170511	0.00133823
ENSMUSG00000024036	Slc37a1	190.076	2.69679	0.233737	11.5377	8.5163e-31	1.85154e-28
ENSMUSG00000040969	Arhgef38	220.624	2.69428	0.295682	9.11207	8.08246e-20	6.93933e-18
ENSMUSG00000105704	Gm43055	4.28836	2.68644	0.796167	3.37422	0.000740262	0.00477205
ENSMUSG00000070533	Wfdc8	13.2009	2.68376	0.591966	4.53363	5.79779e-06	6.66252e-05
ENSMUSG00000024401	Tnf	40.904	2.66577	0.707332	3.76877	0.000164055	0.00129321
ENSMUSG00000079451	Tmprss11g	90.0646	2.66535	0.39902	6.67975	2.39346e-11	7.35751e-10
ENSMUSG00000112741	Gm47341	38.5242	2.6609	0.559995	4.75164	2.01772e-06	2.60391e-05
ENSMUSG00000028040	Efna4	54.5907	2.65869	0.27126	9.80129	1.11157e-22	1.22313e-20
ENSMUSG00000063851	Rnf183	31.6874	2.6581	0.365418	7.27415	3.48615e-13	1.36802e-11
ENSMUSG00000030747	Dgat2	328.092	2.65531	0.25565	10.3865	2.85642e-25	4.05295e-23
ENSMUSG00000019982	Myb	431.271	2.65486	0.383035	6.9311	4.17571e-12	1.42678e-10
ENSMUSG00000045314	Sowahb	37.3434	2.65483	0.318973	8.32305	8.57263e-17	5.12438e-15
ENSMUSG00000029755	Dlx5	63.6752	2.65294	0.373989	7.09364	1.30629e-12	4.77831e-11
ENSMUSG00000067206	Lrrc66	7.71871	2.64716	0.563521	4.69753	2.6332e-06	3.30949e-05
ENSMUSG00000032068	Plet1	2138.75	2.64642	0.537133	4.92693	8.35297e-07	1.16799e-05
ENSMUSG00000097789	Gm2115	18.2553	2.64299	0.357119	7.40087	1.35293e-13	5.56848e-12
ENSMUSG00000112287	Gm47024	62.9154	2.64169	0.474182	5.57105	2.53212e-08	4.84482e-07
ENSMUSG00000007034	Slc44a4	373.675	2.63923	0.243446	10.8412	2.19691e-27	3.63353e-25
ENSMUSG00000027297	Ltk	6.86468	2.63287	0.599081	4.39485	1.10847e-05	0.000118773
ENSMUSG00000097815	Gm26809	443.353	2.62306	0.23981	10.9381	7.58005e-28	1.36234e-25
ENSMUSG00000051279	Gdf6	18.0455	2.6198	0.401926	6.51812	7.11942e-11	2.03534e-09
ENSMUSG00000020892	Aloxe3	10.2825	2.61697	0.503355	5.19904	2.00318e-07	3.18982e-06
ENSMUSG00000087364	Gm13398	7.43489	2.6086	0.667172	3.90993	9.23223e-05	0.000790886
ENSMUSG00000086711	Gm15482	51.7945	2.60104	0.25421	10.2318	1.42791e-24	1.90569e-22
ENSMUSG00000076431	Sox4	667.875	2.599	0.136279	19.0711	4.389e-81	1.47904e-77
ENSMUSG00000021250	Fos	934.165	2.59761	0.383638	6.77099	1.27906e-11	4.04246e-10
ENSMUSG00000038963	Slco4a1	425.445	2.59536	0.39757	6.52806	6.66287e-11	1.91497e-09
ENSMUSG00000037406	Htra4	251.818	2.59478	0.264247	9.81952	9.27837e-23	1.03362e-20
ENSMUSG00000062444	Ap3b2	5.96393	2.59367	0.639568	4.05534	5.00613e-05	0.000461876
ENSMUSG00000030510	Cers3	65.337	2.59182	0.398326	6.50677	7.67824e-11	2.18122e-09
ENSMUSG00000099749	Gm29323	15.0503	2.58437	0.456176	5.66529	1.46774e-08	2.93103e-07
ENSMUSG00000115845	4933402J15Rik	4.7114	2.58122	0.709834	3.63637	0.000276503	0.00202892
ENSMUSG00000029102	Hgfac	666.581	2.58001	0.393129	6.56274	5.2827e-11	1.548e-09
ENSMUSG00000023232	Serinc2	471.47	2.57355	0.33632	7.65209	1.97735e-14	9.03513e-13
ENSMUSG00000037033	Clca3b	52.3232	2.57264	0.571118	4.50457	6.65069e-06	7.55248e-05
ENSMUSG00000046733	Gprc5a	163.69	2.56873	0.293275	8.75876	1.97418e-18	1.43843e-16
ENSMUSG00000089871	Speer4cos	8.70549	2.56753	0.604083	4.2503	2.13485e-05	0.000214591
ENSMUSG00000023070	Rgn	5.31796	2.5616	0.668334	3.83282	0.000126685	0.00103772
ENSMUSG00000097209	AU022754	6.5303	2.55337	0.653081	3.90973	9.24002e-05	0.000791302
ENSMUSG00000047562	Mmp10	43.7825	2.55243	0.577511	4.41971	9.88338e-06	0.000107917
ENSMUSG00000027962	Vcam1	399.452	2.54623	0.782184	3.25529	0.00113277	0.00690443
ENSMUSG00000043621	Ubxn10	24.5739	2.54493	0.374621	6.79335	1.09556e-11	3.49116e-10
ENSMUSG00000002565	Scin	457.834	2.54242	0.36655	6.93608	4.03143e-12	1.3845e-10
ENSMUSG00000000402	Egfl6	113.926	2.54088	0.242814	10.4643	1.25977e-25	1.87636e-23
ENSMUSG00000030000	Add2	78.0276	2.53531	0.259069	9.78624	1.29004e-22	1.40802e-20
ENSMUSG00000020911	Krt19	3549.05	2.53168	0.386319	6.55333	5.62674e-11	1.63991e-09
ENSMUSG00000019989	Enpp3	887.408	2.53101	0.245564	10.3069	6.55822e-25	8.97478e-23
ENSMUSG00000050953	Gja1	9042.63	2.52901	0.23873	10.5936	3.19017e-26	4.94275e-24
ENSMUSG00000031438	Rnf128	1340.39	2.5279	0.320901	7.87751	3.33971e-15	1.67041e-13
ENSMUSG00000041605	Inava	84.3233	2.5171	0.356989	7.05091	1.77747e-12	6.40627e-11
ENSMUSG00000049128	Ivl	5.1344	2.5076	0.773589	3.24151	0.00118897	0.00720786
ENSMUSG00000097579	Gm26799	19.1991	2.50094	0.383212	6.52624	6.74394e-11	1.93415e-09
ENSMUSG00000040447	Spns2	3603.18	2.49976	0.200627	12.4597	1.23765e-35	4.27766e-33
ENSMUSG00000040471	Ggt6	49.4335	2.49702	0.443857	5.62573	1.84726e-08	3.6061e-07
ENSMUSG00000055170	Ifng	9.49907	2.49324	0.752202	3.31458	0.000917798	0.00574615
ENSMUSG00000111468	5033425B01Rik	13.2305	2.48117	0.466924	5.31385	1.07332e-07	1.79613e-06
ENSMUSG00000022951	Rcan1	751.59	2.47868	0.208967	11.8616	1.87368e-32	5.10227e-30
ENSMUSG00000084764	Grip1os2	12.6353	2.47855	0.5667	4.37365	1.22186e-05	0.000130044
ENSMUSG00000016526	Dyrk3	50.5312	2.47349	0.256342	9.64918	4.95494e-22	5.15754e-20
ENSMUSG00000022037	Clu	4378.89	2.46223	0.263335	9.35018	8.7495e-21	8.24747e-19
ENSMUSG00000105300	Gm30613	19.2176	2.45808	0.415976	5.9092	3.43781e-09	7.57807e-08
ENSMUSG00000104920	Gm43215	14.0635	2.45608	0.680024	3.61176	0.000304128	0.00220166
ENSMUSG00000018569	Cldn7	360.304	2.4516	0.371648	6.59655	4.2084e-11	1.25087e-09
ENSMUSG00000057967	Fgf18	8.74071	2.4479	0.731447	3.34666	0.000817925	0.00520429
ENSMUSG00000074300	BC030870	12.4452	2.44785	0.420204	5.82538	5.69819e-09	1.22035e-07
ENSMUSG00000085421	4732490B19Rik	11.2351	2.4441	0.494383	4.94374	7.66369e-07	1.07607e-05
ENSMUSG00000028347	Tmeff1	145.068	2.44332	0.184527	13.241	5.08758e-40	2.36476e-37
ENSMUSG00000028364	Tnc	12524.4	2.44282	0.16983	14.3839	6.52659e-47	4.29147e-44
ENSMUSG00000068348	Gm10238	5.54648	2.43946	0.773314	3.15455	0.00160744	0.00928741
ENSMUSG00000112243	Gm47342	17.4416	2.43068	0.489289	4.96778	6.77253e-07	9.65014e-06
ENSMUSG00000094649	Gm7102	8.07839	2.42406	0.548251	4.42144	9.80442e-06	0.000107185
ENSMUSG00000028348	Cavin4	8.02423	2.42156	0.556212	4.35366	1.33883e-05	0.000141155
ENSMUSG00000034813	Grip1	109.948	2.42099	0.477707	5.06795	4.0213e-07	6.04294e-06
ENSMUSG00000020798	Spns3	68.3715	2.42087	0.279968	8.64696	5.28892e-18	3.64665e-16
ENSMUSG00000113184	AC125351.1	21.6025	2.41774	0.437045	5.53202	3.16566e-08	5.92248e-07
ENSMUSG00000045394	Epcam	1833.52	2.41664	0.31234	7.73721	1.0162e-14	4.86603e-13
ENSMUSG00000026090	2010300C02Rik	243.304	2.41514	0.340978	7.08297	1.41099e-12	5.14733e-11
ENSMUSG00000112947	Gm47493	18.2481	2.413	0.437339	5.51746	3.43942e-08	6.39875e-07
ENSMUSG00000039304	Tnfsf10	1081.28	2.41132	0.332963	7.24201	4.42073e-13	1.7148e-11
ENSMUSG00000026994	Galnt3	319.725	2.41125	0.312622	7.71298	1.22912e-14	5.8235e-13
ENSMUSG00000000303	Cdh1	2288.91	2.4098	0.336534	7.16066	8.02892e-13	3.01885e-11
ENSMUSG00000089767	4930556I23Rik	5.50263	2.40699	0.670176	3.59157	0.000328686	0.00235608
ENSMUSG00000070866	Zfp804a	8.9681	2.40354	0.590511	4.07027	4.69593e-05	0.000436544
ENSMUSG00000038400	Pmepa1	1394.56	2.40273	0.14962	16.0589	4.95144e-58	6.35646e-55
ENSMUSG00000068748	Ptprz1	1248.94	2.40224	0.322925	7.43898	1.01465e-13	4.23435e-12
ENSMUSG00000025610	Map3k7cl	90.9867	2.39311	0.225936	10.592	3.2461e-26	5.00066e-24
ENSMUSG00000021795	Sftpd	1261.9	2.38425	0.281336	8.47475	2.35594e-17	1.49093e-15
ENSMUSG00000023829	Slc22a1	8.41005	2.38159	0.557259	4.27375	1.9221e-05	0.000194951
ENSMUSG00000017002	Slpi	135.948	2.37894	0.663358	3.58621	0.000335523	0.00240012
ENSMUSG00000047281	Sfn	165.872	2.36794	0.259981	9.10812	8.38208e-20	7.17373e-18
ENSMUSG00000049115	Agtr1a	460.761	2.36414	0.234534	10.0802	6.76224e-24	8.36253e-22
ENSMUSG00000111548	Gm8162	10.5786	2.36078	0.616198	3.83121	0.000127516	0.001043
ENSMUSG00000040525	Cblc	145.783	2.35629	0.364258	6.46874	9.8822e-11	2.75221e-09
ENSMUSG00000001870	Ltbp1	4487.17	2.35403	0.118943	19.7914	3.53366e-87	1.36091e-83
ENSMUSG00000000202	Btbd17	7.0585	2.35292	0.562396	4.18375	2.86744e-05	0.000279679
ENSMUSG00000035681	Kcnc2	266.048	2.35183	0.395468	5.94695	2.73179e-09	6.1219e-08
ENSMUSG00000022487	Gtsf1	10.6956	2.35115	0.468115	5.02258	5.09811e-07	7.47362e-06
ENSMUSG00000104876	Trdc	53.466	2.35086	0.234351	10.0314	1.10953e-23	1.35347e-21
ENSMUSG00000044393	Dsg2	713.253	2.34844	0.400178	5.86848	4.39814e-09	9.58523e-08
ENSMUSG00000086608	4930562D21Rik	60.3661	2.34137	0.281278	8.32403	8.50255e-17	5.09378e-15
ENSMUSG00000103788	Gm37527	7.09299	2.33812	0.62835	3.72104	0.000198403	0.00152822
ENSMUSG00000090131	Gm16162	11.6371	2.33324	0.458968	5.08367	3.70214e-07	5.60707e-06
ENSMUSG00000019359	Gdpd2	16.2375	2.32964	0.441667	5.27465	1.3301e-07	2.19049e-06
ENSMUSG00000041886	Macc1	256.017	2.32855	0.331921	7.01538	2.29329e-12	8.13083e-11
ENSMUSG00000109973	Gm45397	134.681	2.32491	0.278229	8.3561	6.48257e-17	3.96289e-15
ENSMUSG00000024534	Sncaip	409.02	2.32463	0.226583	10.2595	1.07228e-24	1.44538e-22
ENSMUSG00000100843	Gm8307	10.5595	2.32146	0.509778	4.55387	5.26685e-06	6.10968e-05
ENSMUSG00000042808	Gpx2	47.6006	2.31821	0.503328	4.60578	4.10929e-06	4.89105e-05
ENSMUSG00000112117	Rmst	41.1011	2.31521	0.42237	5.48146	4.21827e-08	7.72557e-07
ENSMUSG00000091297	Gm8439	14.4168	2.31204	0.514745	4.49163	7.06815e-06	7.97281e-05
ENSMUSG00000029754	Dlx6	57.0631	2.31133	0.37925	6.09447	1.09801e-09	2.60574e-08
ENSMUSG00000041831	Sytl3	49.586	2.29696	0.294297	7.80491	5.95426e-15	2.91856e-13
ENSMUSG00000114745	Gm48802	6.91752	2.29409	0.571676	4.01293	5.99699e-05	0.000540351
ENSMUSG00000030732	Chrdl2	189.346	2.29007	0.313338	7.30862	2.69909e-13	1.0685e-11
ENSMUSG00000036800	Fam135b	34.5668	2.28771	0.523468	4.37028	1.24085e-05	0.000131639
ENSMUSG00000013338	Fer1l4	261.903	2.28017	0.350077	6.51335	7.34928e-11	2.09439e-09
ENSMUSG00000041737	Tmem45b	392.478	2.27895	0.366818	6.21276	5.20612e-10	1.30071e-08
ENSMUSG00000023995	Tspo2	11.0511	2.27848	0.50798	4.48537	7.27866e-06	8.17265e-05
ENSMUSG00000020205	Phlda1	31.8314	2.27702	0.417901	5.44871	5.07359e-08	9.11252e-07
ENSMUSG00000065683	Gm23731	8.01064	2.26379	0.719814	3.14496	0.00166108	0.00954009
ENSMUSG00000005355	Casp14	13.9095	2.26149	0.497489	4.54581	5.47244e-06	6.32911e-05
ENSMUSG00000060512	0610040J01Rik	184.529	2.26088	0.150437	15.0288	4.75613e-51	3.88547e-48
ENSMUSG00000025921	Rdh10	1320.19	2.25862	0.199735	11.3081	1.19622e-29	2.42473e-27
ENSMUSG00000068011	Mkrn2os	45.7296	2.25496	0.271422	8.30797	9.73555e-17	5.78107e-15
ENSMUSG00000026358	Rgs1	796.603	2.25436	0.362612	6.217	5.06736e-10	1.26726e-08
ENSMUSG00000058952	Cfi	169.386	2.24864	0.288212	7.80204	6.09163e-15	2.9697e-13
ENSMUSG00000051439	Cd14	343.617	2.24596	0.35211	6.37858	1.78734e-10	4.833e-09
ENSMUSG00000026579	F5	472.429	2.24367	0.366054	6.12934	8.82439e-10	2.13936e-08
ENSMUSG00000032860	P2ry2	55.5384	2.24155	0.250942	8.93253	4.16371e-19	3.26307e-17
ENSMUSG00000025202	Scd3	6.04567	2.24113	0.59752	3.75071	0.000176331	0.00137829
ENSMUSG00000095649	Gm8979	31.2139	2.24052	0.487647	4.59455	4.33686e-06	5.13246e-05
ENSMUSG00000054889	Dsp	1925.98	2.24039	0.325749	6.87765	6.08499e-12	2.01282e-10
ENSMUSG00000085498	Gm14023	25.6996	2.24031	0.476751	4.69913	2.61273e-06	3.28529e-05
ENSMUSG00000068877	Selenbp2	7.6695	2.2375	0.573946	3.89845	9.68094e-05	0.000823567
ENSMUSG00000097313	Gm26569	11.1818	2.23644	0.583525	3.83264	0.000126777	0.00103789
ENSMUSG00000035498	Cdcp1	465.626	2.23477	0.364559	6.13008	8.78365e-10	2.13195e-08
ENSMUSG00000036834	Plch1	533.918	2.23135	0.283377	7.87414	3.43096e-15	1.70971e-13
ENSMUSG00000038530	Rgs4	651.68	2.23077	0.263459	8.46725	2.51248e-17	1.57888e-15
ENSMUSG00000091457	Gm17171	18.0113	2.2232	0.620311	3.58401	0.000338355	0.00241827
ENSMUSG00000028602	Tnfrsf8	44.3784	2.22168	0.354568	6.26588	3.70734e-10	9.45566e-09
ENSMUSG00000043924	Ncmap	17.5537	2.2197	0.349199	6.35656	2.06323e-10	5.50175e-09
ENSMUSG00000087203	Gm13986	25.2428	2.21827	0.316721	7.00387	2.48989e-12	8.76306e-11
ENSMUSG00000053693	Mast1	19.1137	2.21469	0.524725	4.22066	2.43587e-05	0.000241518
ENSMUSG00000037977	6430571L13Rik	11.085	2.20997	0.521675	4.23629	2.27239e-05	0.000227568
ENSMUSG00000041773	Enc1	280.897	2.2092	0.213295	10.3575	3.87054e-25	5.43469e-23
ENSMUSG00000063415	Cyp26b1	97.9101	2.20755	0.403573	5.47	4.5003e-08	8.18647e-07
ENSMUSG00000091897	Gm17019	24.8659	2.19817	0.47952	4.58411	4.55932e-06	5.35109e-05
ENSMUSG00000100354	Gm29113	5.37971	2.19734	0.621251	3.53696	0.00040476	0.00282107
ENSMUSG00000058248	Kcnh1	21.7756	2.18905	0.369169	5.92968	3.03534e-09	6.77399e-08
ENSMUSG00000046352	Gjb2	316.319	2.18549	0.322704	6.77244	1.26627e-11	4.00672e-10
ENSMUSG00000078161	Erich3	88.3726	2.18516	0.461053	4.7395	2.14247e-06	2.74781e-05
ENSMUSG00000048482	Bdnf	147.211	2.18397	0.313047	6.9765	3.02633e-12	1.05409e-10
ENSMUSG00000091455	Otogl	256.413	2.18249	0.36184	6.03164	1.623e-09	3.75254e-08
ENSMUSG00000030413	Pglyrp1	152.911	2.17888	0.451561	4.82522	1.39846e-06	1.87009e-05
ENSMUSG00000106445	Gm21190	5.42324	2.1773	0.65004	3.34948	0.00080963	0.00516283
ENSMUSG00000026204	Ptprn	14.4094	2.17485	0.429942	5.05848	4.22606e-07	6.32946e-06
ENSMUSG00000040364	Sec1	5.77101	2.17081	0.619504	3.50411	0.00045814	0.00314595
ENSMUSG00000013766	Ly6g6e	8.81924	2.16598	0.513157	4.22089	2.43344e-05	0.00024137
ENSMUSG00000042724	Map3k9	140.985	2.16397	0.297719	7.26849	3.63525e-13	1.42033e-11
ENSMUSG00000047139	Cd24a	13929.4	2.16119	0.342482	6.31038	2.78359e-10	7.24352e-09
ENSMUSG00000110754	4930405J17Rik	8.54454	2.15512	0.544653	3.95687	7.59389e-05	0.000666635
ENSMUSG00000016150	Tenm1	14.0142	2.15032	0.667614	3.2209	0.00127788	0.00766075
ENSMUSG00000038580	Sct	5.75725	2.14707	0.662836	3.23922	0.00119857	0.00725493
ENSMUSG00000070687	Htr1d	11.7225	2.14653	0.482421	4.4495	8.60713e-06	9.52544e-05
ENSMUSG00000031906	Smpd3	217.279	2.13864	0.268619	7.96161	1.69812e-15	8.75328e-14
ENSMUSG00000085295	4930430E12Rik	10.4082	2.1356	0.656749	3.25177	0.0011469	0.00697949
ENSMUSG00000078234	Klhdc7a	205.446	2.13534	0.603127	3.54045	0.000399443	0.0027869
ENSMUSG00000098934	Gm18853	33.3051	2.13259	0.550145	3.87642	0.000106005	0.00088889
ENSMUSG00000033715	Akr1c14	7990.33	2.13154	0.295312	7.21794	5.27811e-13	2.03566e-11
ENSMUSG00000078606	Gm4070	380.402	2.13069	0.450921	4.7252	2.29886e-06	2.93164e-05
ENSMUSG00000102590	Mannr	16.8331	2.1271	0.406889	5.2277	1.71628e-07	2.77061e-06
ENSMUSG00000109814	Gm45847	8.71461	2.12184	0.546219	3.88459	0.000102502	0.000865712
ENSMUSG00000052631	Sh2d6	9.20545	2.12157	0.485823	4.36696	1.2599e-05	0.000133461
ENSMUSG00000072188	Gm10354	8.21408	2.11982	0.579144	3.66026	0.000251956	0.00187276
ENSMUSG00000090021	Gm6493	8.24869	2.11958	0.570275	3.71676	0.00020179	0.00155032
ENSMUSG00000092517	Art2a-ps	35.5896	2.11936	0.54556	3.88475	0.000102437	0.000865436
ENSMUSG00000037035	Inhbb	3860.12	2.11423	0.204538	10.3366	4.81264e-25	6.65353e-23
ENSMUSG00000027186	Elf5	12.5581	2.11389	0.616676	3.42788	0.000608325	0.00402252
ENSMUSG00000011154	Cfap161	16.3838	2.11211	0.480454	4.39606	1.10232e-05	0.00011816
ENSMUSG00000004885	Crabp2	58.1267	2.11207	0.430311	4.90823	9.19022e-07	1.27645e-05
ENSMUSG00000097928	Gm26578	17.07	2.10933	0.347476	6.07044	1.2756e-09	3.00602e-08
ENSMUSG00000037393	Nmur2	114.225	2.10764	0.400433	5.26342	1.41403e-07	2.31597e-06
ENSMUSG00000050762	Prss27	6.71569	2.10636	0.574375	3.66722	0.000245201	0.00183113
ENSMUSG00000018849	Wwc1	845.807	2.09808	0.42344	4.95484	7.23917e-07	1.025e-05
ENSMUSG00000020183	Cpm	371.996	2.09763	0.427715	4.90426	9.37789e-07	1.30051e-05
ENSMUSG00000049723	Mmp12	23.9917	2.08992	0.441625	4.73234	2.21945e-06	2.83574e-05
ENSMUSG00000017723	Wfdc2	1485.8	2.089	0.39615	5.27325	1.34027e-07	2.20453e-06
ENSMUSG00000037946	Fgd3	720.137	2.08572	0.162016	12.8736	6.3391e-38	2.55068e-35
ENSMUSG00000116555	AC129178.1	8.49411	2.08523	0.602597	3.46041	0.000539356	0.00362064
ENSMUSG00000083748	Gm11662	46.9956	2.08267	0.295149	7.05633	1.70963e-12	6.17828e-11
ENSMUSG00000084025	Gm6276	14.6433	2.08148	0.372272	5.59129	2.25394e-08	4.34338e-07
ENSMUSG00000004988	Fxyd4	128.724	2.07837	0.380689	5.45948	4.77539e-08	8.63445e-07
ENSMUSG00000018168	Ikzf3	138.293	2.07827	0.306868	6.77254	1.2654e-11	4.00672e-10
ENSMUSG00000024479	Mal2	1005.68	2.07757	0.315669	6.58148	4.65798e-11	1.37246e-09
ENSMUSG00000045868	Gvin1	313.308	2.07692	0.450439	4.61088	4.00961e-06	4.79144e-05
ENSMUSG00000036856	Wnt4	82.4438	2.07013	0.190006	10.8951	1.21699e-27	2.08974e-25
ENSMUSG00000028766	Alpl	222.666	2.0696	0.338326	6.11719	9.52405e-10	2.29865e-08
ENSMUSG00000052912	Smarca5-ps	8.10475	2.06924	0.506359	4.0865	4.37927e-05	0.000409749
ENSMUSG00000019866	Crybg1	599.706	2.06912	0.219796	9.4138	4.78512e-21	4.59082e-19
ENSMUSG00000023039	Krt7	3902.75	2.06828	0.338968	6.1017	1.04944e-09	2.50149e-08
ENSMUSG00000101156	Gm29114	14.1941	2.06629	0.393073	5.25675	1.46624e-07	2.38987e-06
ENSMUSG00000104350	Gm38244	33.5802	2.06315	0.393144	5.24782	1.53906e-07	2.49799e-06
ENSMUSG00000049721	Gal3st1	8.33859	2.05927	0.644222	3.19653	0.00139093	0.00821426
ENSMUSG00000028341	Nr4a3	154.834	2.05812	0.226103	9.10259	8.82025e-20	7.47907e-18
ENSMUSG00000003617	Cp	2987.52	2.05774	0.35236	5.83986	5.22452e-09	1.12949e-07
ENSMUSG00000085360	Arhgap27os2	8.96344	2.05456	0.583261	3.52253	0.000427448	0.00295855
ENSMUSG00000024486	Hbegf	166.508	2.0516	0.166443	12.3261	6.55263e-35	2.1543e-32
ENSMUSG00000039518	Cdsn	25.2379	2.05157	0.312824	6.55823	5.44493e-11	1.59036e-09
ENSMUSG00000005609	Ctr9	3640.07	2.04417	0.167665	12.192	3.43105e-34	1.06319e-31
ENSMUSG00000099707	Gm8883	27.7186	2.04181	0.354958	5.75225	8.80621e-09	1.81642e-07
ENSMUSG00000092171	4833427F10Rik	28.1924	2.03963	0.381468	5.34679	8.95269e-08	1.52853e-06
ENSMUSG00000085068	Gm15895	11.9709	2.0393	0.604455	3.37378	0.000741429	0.00477843
ENSMUSG00000101848	4933417E11Rik	47.4838	2.03591	0.397886	5.11682	3.10737e-07	4.76788e-06
ENSMUSG00000019892	Lrriq1	23.2105	2.03587	0.460601	4.42003	9.86852e-06	0.000107798
ENSMUSG00000006411	Nectin4	211.363	2.03508	0.250998	8.10796	5.14786e-16	2.81503e-14
ENSMUSG00000035189	Ano4	103.248	2.0343	0.349215	5.82536	5.69908e-09	1.22035e-07
ENSMUSG00000021556	Golm1	1684.01	2.03337	0.233963	8.69098	3.59335e-18	2.50967e-16
ENSMUSG00000086513	9130208D14Rik	39.6118	2.03316	0.422968	4.80689	1.53298e-06	2.02985e-05
ENSMUSG00000041460	Cacna2d4	16.654	2.02232	0.401462	5.03738	4.71953e-07	6.97172e-06
ENSMUSG00000046879	Irgm1	1497.55	2.02044	0.63027	3.20568	0.00134743	0.00800647
ENSMUSG00000029822	Osbpl3	952.621	2.02044	0.204363	9.88653	4.76261e-23	5.44048e-21
ENSMUSG00000101462	Gm3052	52.9795	2.01597	0.344041	5.85967	4.63789e-09	1.00752e-07
ENSMUSG00000026058	Khdrbs2	13.3955	2.01521	0.59838	3.36778	0.000757749	0.00486848
ENSMUSG00000028654	Mycl	45.9233	2.01197	0.215249	9.34718	9.00188e-21	8.45581e-19
ENSMUSG00000035539	Ccdc180	5.86767	2.01055	0.588769	3.41484	0.000638198	0.00419607
ENSMUSG00000105753	Gm43847	43.03	2.00858	0.334229	6.0096	1.85981e-09	4.25986e-08
ENSMUSG00000029651	Mtus2	73.0239	2.00817	0.237913	8.44076	3.15286e-17	1.95848e-15
ENSMUSG00000041347	Bdkrb1	15.0779	2.00757	0.383765	5.23126	1.68355e-07	2.72104e-06
ENSMUSG00000023034	Nr4a1	399.338	2.00385	0.257418	7.78445	7.00173e-15	3.38886e-13
ENSMUSG00000019850	Tnfaip3	275.664	2.00375	0.590084	3.3957	0.000684544	0.00445872
