# Supplementary material for: The pregnant myometrium is epigenetically activated at contractility-driving gene loci prior to the onset of labor in mice
Source: PLoS Biol. 2020 Jul 15;18(7):e3000710. doi: 10.1371/journal.pbio.3000710 (PMC7384763; doi:10.1371/journal.pbio.3000710)
Supplement: S4 Table — d, day. (XLSX) [file pbio.3000710.s022.xlsx]

## Sheet: All genes Lab vs D15
DESeq2 mm10 intron count Labour vs. D15 RNA-seq (n=5)
Highlighted significance: -2 => log2FC >= 2, padj < 0.01
gene_name	gene_id	baseMean	log2FoldChange	lfcSE	stat	pvalue	padj
Wnt7a	ENSMUSG00000030093.7	139.566	10.0586	0.981237	10.2509	1.17264e-24	1.27886e-22
Clec2e	ENSMUSG00000030155.7	90.2517	9.42848	0.93808	10.0508	9.1099e-24	9.3832e-22
Prss22	ENSMUSG00000045027.7	35.1526	8.65006	0.960683	9.00407	2.17494e-19	1.44528e-17
Slc16a14	ENSMUSG00000026220.6	676.183	8.61133	0.51208	16.8164	1.85151e-63	2.28847e-60
Sprr2f	ENSMUSG00000050635.1	33.9038	8.59816	0.99455	8.64528	5.36752e-18	2.95293e-16
D130009I18Rik	ENSMUSG00000115432.1	2855.42	8.55158	1.49208	5.73131	9.96591e-09	1.5308e-07
Adgrg7	ENSMUSG00000022755.4	44.0236	8.39352	1.01066	8.30498	9.98384e-17	4.82032e-15
Gm26877	ENSMUSG00000097373.1	29.2448	8.38062	1.00148	8.36819	5.85085e-17	2.89266e-15
Muc4	ENSMUSG00000079620.13	1154.81	8.35357	0.869152	9.61118	7.17246e-22	6.12799e-20
Krt20	ENSMUSG00000035775.2	25.2217	8.17076	1.1276	7.24612	4.28876e-13	1.34541e-11
Alox12e	ENSMUSG00000018907.10	23.9172	8.09481	1.11701	7.24683	4.26637e-13	1.34293e-11
Nyap2	ENSMUSG00000054976.14	129.249	8.08678	0.699575	11.5596	6.6042e-31	1.17733e-28
Gm10415	ENSMUSG00000107623.1	22.0671	7.97389	1.05737	7.54128	4.65379e-14	1.6819e-12
4930544M13Rik	ENSMUSG00000051758.6	29.7737	7.82722	0.976688	8.01404	1.10996e-15	4.73074e-14
Acod1	ENSMUSG00000022126.6	81.8716	7.80838	2.49824	3.12555	0.00177474	0.00809437
Chil1	ENSMUSG00000064246.10	19.4318	7.79308	3.02803	2.57365	0.0100633	0.0347437
1700041M19Rik	ENSMUSG00000100857.2	19.2462	7.77861	0.981153	7.92803	2.22656e-15	9.19387e-14
Trim40	ENSMUSG00000073399.9	17.393	7.63571	1.1158	6.84324	7.74225e-12	1.98262e-10
CT010467.1	ENSMUSG00000106106.2	17.2949	7.62488	3.02826	2.51791	0.0118053	0.0396074
Il1f6	ENSMUSG00000026984.4	36.4161	7.53927	1.1285	6.68078	2.37667e-11	5.53562e-10
Scn9a	ENSMUSG00000075316.11	15.1338	7.43163	1.5046	4.93926	7.84182e-07	8.26534e-06
Frem3	ENSMUSG00000042353.9	14.9125	7.40814	0.993661	7.4554	8.95938e-14	3.12231e-12
Ctxn3	ENSMUSG00000069372.3	14.8379	7.40138	1.0248	7.22224	5.11399e-13	1.58816e-11
Gm29530	ENSMUSG00000102029.1	32.6894	7.378	1.08519	6.7988	1.05493e-11	2.65378e-10
Cxcl9	ENSMUSG00000029417.9	20.4328	7.28244	2.7165	2.68082	0.00734427	0.0267879
Prss32	ENSMUSG00000048992.9	12.5984	7.16797	1.26374	5.67201	1.41128e-08	2.1135e-07
2310007B03Rik	ENSMUSG00000034159.12	12.5241	7.1566	1.10909	6.45268	1.0989e-10	2.31518e-09
Gm9195	ENSMUSG00000109446.1	12.1724	7.11728	0.963965	7.38334	1.54373e-13	5.2323e-12
Tbpl2	ENSMUSG00000061809.8	10.8247	6.9482	1.0468	6.63756	3.18928e-11	7.30894e-10
Kap	ENSMUSG00000032758.4	1534.59	6.93158	0.713441	9.71571	2.58453e-22	2.32608e-20
Olfm4	ENSMUSG00000022026.7	10.6637	6.93066	1.15707	5.98986	2.10015e-09	3.59528e-08
Gm49431	ENSMUSG00000116130.1	10.5418	6.91131	1.0649	6.49012	8.57703e-11	1.8318e-09
Olfr753-ps1	ENSMUSG00000090556.5	10.5155	6.90739	3.02959	2.27997	0.0226092	0.0671325
Dsg3	ENSMUSG00000056632.8	23.3971	6.89547	1.03487	6.66312	2.68068e-11	6.18156e-10
Ptprh	ENSMUSG00000035429.13	100.58	6.84159	0.726887	9.41218	4.85943e-21	3.86668e-19
Gm40477	ENSMUSG00000113940.1	8.88486	6.66515	1.0665	6.24956	4.11619e-10	7.88369e-09
5330439A09Rik	ENSMUSG00000089708.1	13.3651	6.66288	1.00314	6.64206	3.09329e-11	7.09773e-10
Ptprn	ENSMUSG00000026204.15	8.33201	6.56707	1.14436	5.73864	9.54377e-09	1.47206e-07
Trim15	ENSMUSG00000050747.14	160.411	6.53999	1.19531	5.47136	4.46595e-08	6.01298e-07
Gm45012	ENSMUSG00000109052.1	7.9203	6.50223	1.10545	5.88197	4.05416e-09	6.59913e-08
Clca1	ENSMUSG00000028255.6	17.5794	6.47432	1.00641	6.43308	1.25042e-10	2.60481e-09
Gm15600	ENSMUSG00000085969.1	7.73704	6.46173	1.00976	6.39928	1.56112e-10	3.1736e-09
Clca3b	ENSMUSG00000037033.9	10.9155	6.37513	1.10085	5.79109	6.99294e-09	1.09965e-07
Gm6325	ENSMUSG00000081778.1	10.9311	6.37392	1.14985	5.54327	2.96875e-08	4.14775e-07
Gm35019	ENSMUSG00000115326.1	70.34	6.3435	0.542349	11.6964	1.33051e-31	2.54305e-29
Cxcl2	ENSMUSG00000058427.10	6.80523	6.28154	1.67388	3.75269	0.000174946	0.00106519
4930459C07Rik	ENSMUSG00000112762.1	6.65398	6.2509	1.20841	5.17285	2.30547e-07	2.73121e-06
Il24	ENSMUSG00000026420.16	42.0957	6.20072	0.702149	8.83106	1.03689e-18	6.34454e-17
Tspan1	ENSMUSG00000028699.9	88.4415	6.18058	0.532816	11.5998	4.12938e-31	7.43288e-29
Golt1a	ENSMUSG00000103421.1	20.6647	6.1759	0.94058	6.56606	5.16656e-11	1.14169e-09
Lipm	ENSMUSG00000056078.5	6.3096	6.17164	1.02717	6.0084	1.87365e-09	3.25257e-08
Gbp2b	ENSMUSG00000040264.10	71.283	6.15962	1.95279	3.15426	0.00160903	0.00742444
Ghrh	ENSMUSG00000027643.9	6.16931	6.13455	1.23791	4.95558	7.21139e-07	7.68386e-06
Ccnb3	ENSMUSG00000051592.14	37.9441	6.09886	0.953719	6.39481	1.60743e-10	3.26058e-09
1700011B04Rik	ENSMUSG00000102099.2	5.95531	6.08744	3.03219	2.0076	0.0446854	0.11545
Ido1	ENSMUSG00000031551.12	27.5277	6.0239	2.36372	2.54849	0.0108192	0.0368592
Padi3	ENSMUSG00000025328.9	19.1441	6.02023	0.982562	6.12707	8.9511e-10	1.62699e-08
Arg1	ENSMUSG00000019987.9	71.1651	5.99763	0.754039	7.954	1.80591e-15	7.50709e-14
Oog1	ENSMUSG00000096576.2	5.53478	5.98474	1.52686	3.91965	8.86771e-05	0.000577679
Myo3b	ENSMUSG00000042064.13	1840.23	5.93393	0.194751	30.4694	6.63821e-204	1.23072e-199
Pnoc	ENSMUSG00000045731.6	5.3674	5.9335	1.38624	4.2803	1.86645e-05	0.000143228
Entpd8	ENSMUSG00000036813.11	17.9314	5.89976	1.0617	5.55692	2.74579e-08	3.87715e-07
Gm30806	ENSMUSG00000114697.1	34.0833	5.8922	0.703649	8.37378	5.57968e-17	2.77338e-15
Lcn2	ENSMUSG00000026822.14	334.754	5.88769	0.726738	8.10154	5.42686e-16	2.40129e-14
Gm35733	ENSMUSG00000114843.1	5.00665	5.83033	1.14376	5.09752	3.44125e-07	3.92861e-06
Gm4841	ENSMUSG00000068606.5	4.81244	5.78156	2.01264	2.87263	0.00407072	0.0163641
Cyp2d10	ENSMUSG00000094806.2	4.77198	5.76932	1.44641	3.98873	6.64285e-05	0.000447849
Bcl2l15	ENSMUSG00000044165.12	328.043	5.76805	0.46586	12.3815	3.29122e-35	8.71704e-33
C430002N11Rik	ENSMUSG00000101581.6	567.565	5.73099	0.468358	12.2364	1.98756e-34	4.78563e-32
Prl8a6	ENSMUSG00000021345.16	6.91517	5.71135	1.09211	5.22967	1.69817e-07	2.06996e-06
Taf7l	ENSMUSG00000009596.9	4.48797	5.67753	1.24826	4.54837	5.40632e-06	4.76846e-05
Rp1l1	ENSMUSG00000046049.7	14.6104	5.65122	0.906975	6.23085	4.63914e-10	8.80344e-09
Prl2a1	ENSMUSG00000022886.5	4.34856	5.63315	1.5457	3.6444	0.000268013	0.00155816
Cxcl11	ENSMUSG00000060183.6	4.26326	5.60635	2.49291	2.24892	0.0245174	0.0717414
Prl7b1	ENSMUSG00000021347.3	4.25098	5.60422	1.31231	4.27051	1.95025e-05	0.000149042
Prl2c2	ENSMUSG00000079092.4	4.24413	5.59822	1.43597	3.89856	9.67659e-05	0.000624666
Dao	ENSMUSG00000042096.15	4.24789	5.59709	1.99436	2.80646	0.0050089	0.0194685
Syt16	ENSMUSG00000044912.10	648.989	5.58006	0.761348	7.32919	2.31547e-13	7.598e-12
1700063K16Rik	ENSMUSG00000102036.1	4.19012	5.57727	1.16857	4.77273	1.81747e-06	1.7716e-05
Ptgs2	ENSMUSG00000032487.8	36.7534	5.56076	0.612459	9.07939	1.09182e-19	7.46952e-18
Alox15	ENSMUSG00000018924.6	21.6455	5.47173	0.9293	5.88801	3.90863e-09	6.37905e-08
Kndc1	ENSMUSG00000066129.15	3.76293	5.43005	1.17308	4.62887	3.67669e-06	3.37622e-05
Glra2	ENSMUSG00000018589.8	3.77124	5.42441	1.10453	4.91106	9.05859e-07	9.41403e-06
Gm45924	ENSMUSG00000115620.1	3.72682	5.40432	1.20856	4.4717	7.7599e-06	6.56634e-05
Mmp7	ENSMUSG00000018623.9	143.366	5.35653	1.07383	4.98827	6.09223e-07	6.59369e-06
Sult1e1	ENSMUSG00000029272.8	3.59087	5.35047	1.43589	3.72622	0.00019437	0.00116887
Gm1965	ENSMUSG00000090254.7	5.32143	5.33055	1.15282	4.62392	3.76547e-06	3.45091e-05
Ptgdr2	ENSMUSG00000034117.3	11.795	5.32805	0.985901	5.40425	6.50819e-08	8.55758e-07
BC016579	ENSMUSG00000033187.8	66.04	5.31808	0.405482	13.1155	2.68517e-39	9.39302e-37
Ifi202b	ENSMUSG00000026535.9	3.45628	5.30591	1.73435	3.05931	0.00221845	0.00977192
Ltf	ENSMUSG00000032496.7	31795.1	5.30588	0.342937	15.4719	5.36991e-54	4.52537e-51
Gm15866	ENSMUSG00000087290.2	76.2158	5.30494	0.574946	9.22686	2.78689e-20	2.03421e-18
Pdcd1	ENSMUSG00000026285.7	3.35433	5.26343	1.65108	3.18786	0.00143328	0.00671713
Cntnap3	ENSMUSG00000033063.8	215.392	5.25415	1.03093	5.09653	3.45929e-07	3.94436e-06
1700016C15Rik	ENSMUSG00000015962.5	3.30982	5.24101	1.09362	4.79237	1.6482e-06	1.61681e-05
Trem1	ENSMUSG00000042265.13	10.1486	5.22202	2.47018	2.11402	0.0345133	0.0942243
Tmprss11d	ENSMUSG00000061259.11	35.6966	5.20379	0.608932	8.54576	1.27691e-17	6.76398e-16
Tekt1	ENSMUSG00000020799.16	3.17761	5.17944	2.00695	2.58076	0.00985842	0.0341444
Gtsf1	ENSMUSG00000022487.14	3.08895	5.14091	1.42793	3.60025	0.000317907	0.00180778
Gper1	ENSMUSG00000053647.4	3.06938	5.1328	1.47718	3.47472	0.000511378	0.00274016
Gm7804	ENSMUSG00000103357.1	3.06306	5.1221	1.18541	4.32096	1.55352e-05	0.000121477
Noxa1	ENSMUSG00000036805.13	20.0063	5.08895	0.814695	6.24645	4.19882e-10	8.02796e-09
Dio2	ENSMUSG00000007682.6	689.033	5.06584	0.415796	12.1835	3.80649e-34	9.04773e-32
Il6	ENSMUSG00000025746.11	18.5022	5.06239	1.16457	4.34701	1.38005e-05	0.000109765
Grpr	ENSMUSG00000031364.2	25.3023	5.02337	0.732829	6.85476	7.14348e-12	1.842e-10
Gm40915	ENSMUSG00000114404.1	2.82898	5.00959	1.19067	4.20737	2.58358e-05	0.000192213
Tmem178	ENSMUSG00000024245.4	67.855	5.00811	0.535991	9.34365	9.3065e-21	7.04255e-19
Gm9573	ENSMUSG00000090588.2	2.78607	4.99505	1.73775	2.87444	0.00404748	0.0163025
AC140413.1	ENSMUSG00000117655.1	2.73257	4.96093	1.50402	3.29846	0.000972184	0.00481161
Lipk	ENSMUSG00000024771.7	44.9977	4.95781	0.682645	7.26265	3.79579e-13	1.20503e-11
Mkrn2os	ENSMUSG00000068011.4	8.95502	4.94634	0.953161	5.18941	2.10957e-07	2.52985e-06
Tmprss11b	ENSMUSG00000035861.6	2.70202	4.94626	1.19419	4.14193	3.44399e-05	0.000249323
Malrd1	ENSMUSG00000075520.5	1055.59	4.93129	0.419845	11.7455	7.44779e-32	1.45349e-29
Egfl6	ENSMUSG00000000402.2	215.279	4.92411	0.343438	14.3377	1.2721e-46	6.73848e-44
Ubd	ENSMUSG00000035186.6	2.6235	4.90668	2.59431	1.89132	0.0585813	0.142476
Nppc	ENSMUSG00000026241.5	20.4768	4.90158	0.674556	7.26637	3.6927e-13	1.17836e-11
Bcas1os2	ENSMUSG00000086999.1	3.99991	4.89473	1.09273	4.47936	7.48669e-06	6.36129e-05
Clec4e	ENSMUSG00000030142.10	86.7571	4.87014	1.37411	3.54421	0.00039379	0.00217612
Tgm6	ENSMUSG00000027403.12	2.563	4.86746	1.71142	2.84411	0.00445352	0.0176503
4930412B13Rik	ENSMUSG00000086221.1	3.90503	4.86156	1.12626	4.31654	1.58497e-05	0.00012378
Myh2	ENSMUSG00000033196.17	3.8823	4.85033	1.14821	4.22426	2.39727e-05	0.000179505
AC105304.1	ENSMUSG00000117110.1	2.53536	4.84847	1.18876	4.07859	4.53101e-05	0.00031688
Dlk2	ENSMUSG00000047428.14	2.49794	4.83608	2.00763	2.40885	0.0160027	0.0509513
Gm48053	ENSMUSG00000112837.1	3.79208	4.81564	1.10475	4.35904	1.30635e-05	0.00010444
Mirt2	ENSMUSG00000115946.2	2.46017	4.81552	2.00047	2.40719	0.0160758	0.0511227
Gm2115	ENSMUSG00000097789.2	32.2822	4.78298	0.494705	9.66834	4.10992e-22	3.64584e-20
Glrp1	ENSMUSG00000062310.7	13.1235	4.77413	0.871805	5.47614	4.347e-08	5.86561e-07
S100a8	ENSMUSG00000056054.9	2.3527	4.75092	2.12529	2.23542	0.0253896	0.0737811
Serpina9	ENSMUSG00000058260.2	12.7977	4.74329	0.862548	5.49916	3.81597e-08	5.19824e-07
Gm6999	ENSMUSG00000097927.2	2.33346	4.74252	1.24633	3.8052	0.000141689	0.000882403
Trdc	ENSMUSG00000104876.1	3.56343	4.73959	1.1071	4.28107	1.85994e-05	0.000142788
Mindy4b-ps	ENSMUSG00000101860.4	2.34371	4.73301	1.24982	3.78696	0.000152504	0.000942161
Thbs1	ENSMUSG00000040152.8	1787.05	4.71803	0.314417	15.0056	6.74587e-51	4.81032e-48
1700029J03Rik	ENSMUSG00000099968.7	23.834	4.71796	0.661406	7.13323	9.80412e-13	2.88521e-11
Btbd17	ENSMUSG00000000202.9	18.9143	4.70593	0.795741	5.9139	3.34101e-09	5.50598e-08
Gm47754	ENSMUSG00000114784.1	321.22	4.69765	0.352788	13.3158	1.87413e-40	6.94926e-38
Slc12a3	ENSMUSG00000031766.4	3.48267	4.69232	1.15232	4.07205	4.66012e-05	0.000324563
Gm36426	ENSMUSG00000113796.1	3.46078	4.68492	1.14663	4.08583	4.39203e-05	0.000308207
E030025P04Rik	ENSMUSG00000078605.2	10.379	4.68465	0.867811	5.39824	6.7297e-08	8.82381e-07
Zbtb12	ENSMUSG00000049823.9	3.42031	4.68154	1.16252	4.02707	5.64751e-05	0.00038608
Cxcr2	ENSMUSG00000026180.8	3.44816	4.68081	1.59058	2.94283	0.00325222	0.0135619
Gm10851	ENSMUSG00000102329.1	2.23467	4.67738	2.15294	2.17256	0.0298135	0.0839396
Elf3	ENSMUSG00000003051.13	220.617	4.66641	0.459435	10.1568	3.08941e-24	3.23603e-22
Ccdc110	ENSMUSG00000071104.10	2.22999	4.6662	1.5742	2.96417	0.00303501	0.0127826
Chil3	ENSMUSG00000040809.10	5.13195	4.66243	1.98635	2.34724	0.0189132	0.0581607
Gm10436	ENSMUSG00000066027.7	2.18749	4.64664	1.83232	2.53593	0.0112151	0.0379514
Galntl5	ENSMUSG00000028938.9	2.19306	4.64395	1.27764	3.63479	0.000278205	0.00161135
Speer9-ps1	ENSMUSG00000107956.1	14.9732	4.63964	0.875521	5.29929	1.16254e-07	1.46522e-06
Gm5833	ENSMUSG00000100459.6	2.18349	4.63512	2.08592	2.2221	0.0262763	0.0759886
Tmem54	ENSMUSG00000028786.15	27.0439	4.63141	0.651542	7.10839	1.17408e-12	3.42255e-11
Vmn1r34	ENSMUSG00000091012.2	2.17311	4.6286	2.03463	2.27491	0.0229114	0.0678559
Gm39327	ENSMUSG00000111811.1	2.13738	4.61005	1.99168	2.31466	0.0206316	0.0623591
Bglap3	ENSMUSG00000074489.9	4.91162	4.59809	1.22419	3.75603	0.000172629	0.00105177
AI463229	ENSMUSG00000114828.1	30.7957	4.59672	0.636624	7.22046	5.18131e-13	1.6037e-11
Uox	ENSMUSG00000028186.14	33.7809	4.59281	0.930575	4.93546	7.99635e-07	8.39957e-06
Gm15482	ENSMUSG00000086711.1	2.09282	4.57534	1.26897	3.60555	0.00031149	0.00177693
Capn13	ENSMUSG00000043705.7	2.07612	4.56635	1.5008	3.04262	0.00234529	0.0102503
Pkp1	ENSMUSG00000026413.12	2.07323	4.56031	2.11216	2.15907	0.0308444	0.0862008
Olfm3	ENSMUSG00000027965.15	2.05838	4.55558	1.63876	2.7799	0.00543762	0.0208284
H60c	ENSMUSG00000091618.3	55.8892	4.55227	0.541045	8.41386	3.96729e-17	1.99874e-15
1700012B07Rik	ENSMUSG00000020617.13	2.05109	4.55189	2.66392	1.70872	0.0875032	0.193917
Gm30083	ENSMUSG00000115726.1	2.04123	4.54747	1.28458	3.54004	0.000400062	0.00220551
Gm43821	ENSMUSG00000105219.1	13.5297	4.52221	0.819827	5.51605	3.46696e-08	4.75424e-07
Hsd17b2	ENSMUSG00000031844.8	152.646	4.5102	0.582666	7.74064	9.89212e-15	3.84486e-13
Gbp10	ENSMUSG00000105096.1	22.8207	4.50539	2.46151	1.83034	0.0671997	0.158308
Gm49231	ENSMUSG00000115013.1	1.98	4.49683	1.30909	3.43507	0.000592406	0.00311315
Il1f9	ENSMUSG00000044103.4	41.5317	4.49131	0.754793	5.95038	2.67521e-09	4.47336e-08
Gm28040	ENSMUSG00000115958.1	75.1499	4.48728	0.594937	7.54245	4.61212e-14	1.67009e-12
Gdpd2	ENSMUSG00000019359.14	4.54456	4.48202	1.18013	3.7979	0.00014593	0.000906073
Apobec2	ENSMUSG00000040694.4	13.4178	4.47302	0.696838	6.41903	1.37149e-10	2.83156e-09
Tnc	ENSMUSG00000028364.15	18207.7	4.44944	0.296933	14.9847	9.25053e-51	6.35203e-48
Gm2694	ENSMUSG00000097248.9	1.91857	4.44936	3.04485	1.46127	0.14394	0.281592
Kcnq2	ENSMUSG00000016346.17	1.91857	4.44936	3.04485	1.46127	0.14394	0.281592
Pebp4	ENSMUSG00000022085.4	1.91265	4.44376	1.54966	2.86757	0.00413643	0.0165815
4930578I06Rik	ENSMUSG00000021961.6	2.955	4.44158	1.40468	3.16198	0.00156699	0.00725394
2310069B03Rik	ENSMUSG00000100291.6	6.16689	4.44124	1.40681	3.15696	0.00159423	0.00736714
Itgb6	ENSMUSG00000026971.15	1738.62	4.41719	0.375424	11.7659	5.85241e-32	1.15429e-29
Ccdc33	ENSMUSG00000037716.15	38.1582	4.41386	0.693834	6.36156	1.99719e-10	4.0117e-09
Ddit4	ENSMUSG00000020108.4	2.88123	4.41115	1.13764	3.87745	0.000105556	0.000675062
Gm43150	ENSMUSG00000106777.1	1.85978	4.40939	1.37888	3.19781	0.00138473	0.00652591
AC144797.1	ENSMUSG00000117270.1	1.85404	4.40411	2.02648	2.17328	0.0297595	0.0838385
Trpv6	ENSMUSG00000029868.13	1281.82	4.40388	0.295743	14.8909	3.77461e-50	2.41315e-47
Marco	ENSMUSG00000026390.7	1.84389	4.39878	2.70159	1.62822	0.103478	0.220769
Nlrp12	ENSMUSG00000078817.4	2.82857	4.39577	1.88129	2.33657	0.0194617	0.0594628
Xlr4c	ENSMUSG00000031362.17	2.82589	4.39365	1.96412	2.23696	0.0252891	0.0735696
Chil6	ENSMUSG00000027902.8	8.14731	4.39066	0.966884	4.54105	5.5976e-06	4.90915e-05
Cxcl17	ENSMUSG00000060188.6	223.584	4.37355	0.427566	10.2289	1.47116e-24	1.56755e-22
LOC102637012	ENSMUSG00000111473.1	1.78693	4.34647	1.34368	3.23476	0.00121746	0.00583548
Wnt7b	ENSMUSG00000022382.15	365.592	4.34553	0.377868	11.5001	1.31701e-30	2.282e-28
Gm20663	ENSMUSG00000093378.2	5.84887	4.34448	1.20578	3.60304	0.000314515	0.00179094
Art2b	ENSMUSG00000030651.5	1.77048	4.34154	2.17236	1.99854	0.0456585	0.117359
2610204G07Rik	ENSMUSG00000084860.1	1.77333	4.33749	1.29317	3.35415	0.000796088	0.00403595
Gm16133	ENSMUSG00000089854.2	16.1685	4.32895	0.666209	6.49788	8.14577e-11	1.74795e-09
Gm12897	ENSMUSG00000083949.1	1.75591	4.32666	1.31252	3.29645	0.000979139	0.00483828
B930018H19Rik	ENSMUSG00000109819.1	10.0356	4.32141	0.818557	5.27931	1.29673e-07	1.61863e-06
Gm33677	ENSMUSG00000112778.1	1.73589	4.31357	1.35458	3.18444	0.00145034	0.00678508
Fscn2	ENSMUSG00000025380.2	2.66569	4.30984	1.517	2.84104	0.00449669	0.0178044
5730419F03Rik	ENSMUSG00000099364.1	31.8889	4.29529	0.479964	8.94919	3.58111e-19	2.30534e-17
Trpv5	ENSMUSG00000036899.10	1.71097	4.28425	2.07657	2.06314	0.0390993	0.103824
Tmem212	ENSMUSG00000043164.3	59.948	4.28115	0.36813	11.6295	2.91902e-31	5.35828e-29
Clca3a2	ENSMUSG00000028262.13	17.0852	4.27948	0.636378	6.72475	1.75898e-11	4.19172e-10
Nos2	ENSMUSG00000020826.8	187.355	4.27288	1.5168	2.81704	0.0048469	0.0189421
Gnat1	ENSMUSG00000034837.12	1.69028	4.26656	1.62438	2.62657	0.00862509	0.0305657
Casp14	ENSMUSG00000005355.9	1.69392	4.26573	1.30463	3.26968	0.0010767	0.00526011
Gm28577	ENSMUSG00000093753.1	1.67551	4.26556	1.73757	2.4549	0.0140923	0.0458291
Padi1	ENSMUSG00000025329.3	2929.8	4.26547	0.45692	9.33527	1.00732e-20	7.59177e-19
Trpc5	ENSMUSG00000041710.4	13.5646	4.2346	0.931093	4.54799	5.41612e-06	4.77484e-05
Serpina3f	ENSMUSG00000066363.12	23.0323	4.23281	2.49465	1.69675	0.0897433	0.1977
Chia1	ENSMUSG00000062778.12	2.49837	4.21029	1.62719	2.58745	0.00966886	0.0336261
Krt84	ENSMUSG00000044294.8	2.50662	4.20537	1.19134	3.52996	0.000415627	0.00228318
Slpi	ENSMUSG00000017002.14	2.47132	4.19235	1.53897	2.72412	0.00644727	0.0240556
Gm40916	ENSMUSG00000114355.1	5.46057	4.18892	0.955915	4.38211	1.17536e-05	9.49918e-05
Oxtr	ENSMUSG00000049112.9	457.59	4.18768	0.292414	14.3211	1.616e-46	8.3224e-44
Il1f8	ENSMUSG00000026985.1	14.1624	4.18508	0.843862	4.95944	7.06958e-07	7.55012e-06
Atf7ip2	ENSMUSG00000039200.16	14.3729	4.18121	0.613882	6.81111	9.68503e-12	2.443e-10
Gpa33	ENSMUSG00000000544.14	6.94417	4.17365	1.11892	3.73009	0.000191411	0.00115257
Aire	ENSMUSG00000000731.15	1.57425	4.1664	2.76319	1.50782	0.131601	0.263836
Prl2c5	ENSMUSG00000055360.13	3.66071	4.14519	1.19591	3.46615	0.000527969	0.00281766
5430434I15Rik	ENSMUSG00000106002.1	1.54067	4.13971	1.37901	3.00194	0.00268268	0.0114892
Grem2	ENSMUSG00000050069.3	219.659	4.13562	0.222735	18.5674	5.89374e-77	1.561e-73
Clu	ENSMUSG00000022037.15	443.061	4.13489	0.348858	11.8527	2.08491e-32	4.49468e-30
S100a9	ENSMUSG00000056071.12	21.2347	4.13447	1.70912	2.41906	0.0155608	0.0497716
Cntnap5b	ENSMUSG00000067028.11	35.2854	4.12703	0.498998	8.27064	1.3324e-16	6.31781e-15
Socs3	ENSMUSG00000053113.3	6.65657	4.11012	1.28697	3.19365	0.00140489	0.00659909
Apol7a	ENSMUSG00000010601.14	111.24	4.10797	0.565152	7.26879	3.62734e-13	1.1595e-11
Prl7d1	ENSMUSG00000021348.3	1.51188	4.10467	2.13536	1.92224	0.0545757	0.134965
Gm9951	ENSMUSG00000054618.8	1.50779	4.09757	1.64941	2.48427	0.0129817	0.0427952
C630028M04Rik	ENSMUSG00000085515.1	2.31488	4.09663	1.44847	2.82825	0.00468025	0.0183722
Fos	ENSMUSG00000021250.13	117.457	4.09036	0.533055	7.67343	1.6746e-14	6.33615e-13
Fpr1	ENSMUSG00000045551.7	3.50699	4.08929	1.96982	2.07597	0.0378968	0.101415
Gm20618	ENSMUSG00000093675.7	1.49638	4.08804	1.62903	2.5095	0.0120904	0.0403957
Tinag	ENSMUSG00000032357.12	223.608	4.08703	0.398831	10.2475	1.21421e-24	1.31646e-22
Cfi	ENSMUSG00000058952.12	32.028	4.08425	0.454409	8.98806	2.51639e-19	1.66028e-17
D730001G18Rik	ENSMUSG00000101026.1	3.49246	4.08086	1.20234	3.3941	0.000688534	0.00354595
Fnd3c2	ENSMUSG00000073012.2	1.47757	4.07	1.38571	2.93712	0.00331274	0.0137725
Gm26651	ENSMUSG00000097495.1	1.47325	4.06671	1.3476	3.01775	0.0025466	0.0109851
Cxcl1	ENSMUSG00000029380.11	2.27408	4.06019	1.78119	2.27948	0.0226384	0.0672083
Scd3	ENSMUSG00000025202.7	1.46021	4.05754	1.62072	2.50354	0.0122956	0.0409728
Fam83a	ENSMUSG00000051225.9	1.45959	4.05632	1.33266	3.04377	0.0023363	0.0102158
Trank1	ENSMUSG00000062296.8	33.654	4.05591	0.742618	5.46164	4.71764e-08	6.34265e-07
Gm22000	ENSMUSG00000086932.1	14.9987	4.0458	0.620088	6.52456	6.8201e-11	1.47888e-09
Plekhg4	ENSMUSG00000014782.16	6.47659	4.03314	1.04336	3.86554	0.000110843	0.000706435
Gm40918	ENSMUSG00000114732.1	6.3108	4.02486	1.13939	3.53247	0.000411691	0.00226491
AA467197	ENSMUSG00000033213.16	68.0179	4.02295	1.1195	3.59353	0.000326224	0.00184621
4933402J15Rik	ENSMUSG00000115845.1	6.38495	4.02278	0.93617	4.29706	1.73081e-05	0.000133864
4933412O06Rik	ENSMUSG00000113960.1	1.4171	4.01989	1.75835	2.28617	0.0222445	0.0662191
Gm47391	ENSMUSG00000112891.1	2.19339	4.01836	1.44172	2.78719	0.00531667	0.0204335
Gm36377	ENSMUSG00000113909.1	4.80435	4.01331	1.09872	3.65271	0.000259484	0.00151714
Msx2	ENSMUSG00000021469.9	1.40815	3.99858	1.74528	2.29108	0.0219585	0.0655152
Togaram2	ENSMUSG00000045761.16	30.5755	3.99299	0.78357	5.09589	3.47099e-07	3.95527e-06
Gm35363	ENSMUSG00000110301.1	2.18848	3.99074	1.24027	3.21764	0.00129251	0.00615069
Unc5cl	ENSMUSG00000043592.15	1118.22	3.98	0.384431	10.353	4.05727e-25	4.64332e-23
Ly6g6e	ENSMUSG00000013766.11	1.38364	3.97965	2.83022	1.40613	0.159687	0.303464
Fam213a	ENSMUSG00000021792.15	5363.81	3.97919	0.230437	17.268	8.19164e-67	1.16825e-63
Gm40723	ENSMUSG00000112134.1	3.22762	3.97673	1.14549	3.47164	0.000517281	0.00276779
Saa3	ENSMUSG00000040026.8	14.7805	3.96489	2.27539	1.74251	0.0814184	0.183682
Prok2	ENSMUSG00000030069.15	1.36537	3.96075	2.14173	1.84932	0.0644113	0.153415
Il1b	ENSMUSG00000027398.13	69.824	3.95563	1.15128	3.43586	0.000590682	0.00310498
Gm36756	ENSMUSG00000113634.1	2.12157	3.95102	1.48929	2.65295	0.00797919	0.0287195
Sycp2l	ENSMUSG00000038651.15	1.35171	3.94723	1.76207	2.24011	0.0250839	0.0730874
Mroh3	ENSMUSG00000087230.10	70.5123	3.94371	0.492379	8.0095	1.15176e-15	4.89764e-14
Prss46	ENSMUSG00000049719.14	1.34552	3.94217	1.38009	2.85645	0.00428402	0.0170918
Itprid1	ENSMUSG00000037973.6	14.2055	3.94079	0.74469	5.29185	1.21085e-07	1.52094e-06
Dnajc5b	ENSMUSG00000027606.12	3.16882	3.93732	1.5107	2.60628	0.00915312	0.0320913
Mycl	ENSMUSG00000028654.13	3.15964	3.92543	1.33466	2.94115	0.00326998	0.0136267
Fpr2	ENSMUSG00000052270.7	40.9171	3.90511	1.48256	2.63403	0.0084377	0.0299971
Glt1d1	ENSMUSG00000049971.17	1.30894	3.90405	2.25376	1.73224	0.083231	0.186839
AL805899.2	ENSMUSG00000117251.1	3.12343	3.89719	1.16149	3.35533	0.000792701	0.00401988
Slc26a9	ENSMUSG00000042268.10	3.12982	3.8948	1.53286	2.54086	0.0110579	0.0375277
Gm36120	ENSMUSG00000111820.1	20.0272	3.88491	1.19787	3.24318	0.00118203	0.00569512
Gm34068	ENSMUSG00000103305.1	13.4968	3.8834	0.922405	4.21008	2.55279e-05	0.000190228
Gm18857	ENSMUSG00000110055.1	6.13035	3.88091	0.985784	3.93688	8.25496e-05	0.000543105
Cftr	ENSMUSG00000041301.15	4796.91	3.87949	0.590288	6.5722	4.95785e-11	1.10082e-09
Kcnrg	ENSMUSG00000046168.9	3.05257	3.87481	1.19564	3.24079	0.00119198	0.00573084
Gm29455	ENSMUSG00000101179.1	1.28634	3.87252	2.23755	1.73069	0.0835067	0.187263
Gm15475	ENSMUSG00000087001.2	1.2853	3.87144	2.23755	1.73021	0.0835919	0.187422
Olfr459	ENSMUSG00000045479.7	2.02104	3.87013	1.51882	2.54812	0.0108306	0.0368845
Gm48427	ENSMUSG00000112234.1	8.86583	3.85493	0.864367	4.45983	8.20245e-06	6.90615e-05
Mrgpra2a	ENSMUSG00000093973.1	1.26225	3.85304	2.84176	1.35587	0.175141	0.32455
Slc26a4	ENSMUSG00000020651.8	787.663	3.85185	0.442168	8.71129	3.0044e-18	1.71918e-16
Gm49180	ENSMUSG00000115735.1	1.25918	3.84965	2.853	1.34933	0.17723	0.327275
Dusp4	ENSMUSG00000031530.6	8.67394	3.84826	0.74173	5.18823	2.12307e-07	2.54274e-06
Naip1	ENSMUSG00000021640.6	1919.3	3.84224	0.673726	5.70297	1.17736e-08	1.79066e-07
1700025F22Rik	ENSMUSG00000024728.13	1.24687	3.83541	3.0547	1.25558	0.209269	0.368439
Fmr1nb	ENSMUSG00000062170.12	1.9613	3.83026	1.79931	2.12873	0.0332764	0.0915348
Ltk	ENSMUSG00000027297.14	2.93208	3.82018	1.56231	2.44521	0.0144767	0.0468881
Vmn2r122	ENSMUSG00000096730.7	1.23684	3.8198	2.85511	1.33788	0.180935	0.332132
Gm13049	ENSMUSG00000085097.1	1.95218	3.81644	1.78179	2.14191	0.0322007	0.0892111
Lpo	ENSMUSG00000009356.12	1.94239	3.81449	1.43438	2.65934	0.00782938	0.0282571
Bpifc	ENSMUSG00000050108.12	17.262	3.81239	0.586683	6.49821	8.12792e-11	1.74795e-09
Syt8	ENSMUSG00000031098.18	46.8855	3.81155	0.499543	7.63009	2.34597e-14	8.71631e-13
Grip1os3	ENSMUSG00000085454.1	30.4246	3.80627	0.671487	5.66842	1.44122e-08	2.14864e-07
Gm11149	ENSMUSG00000079564.3	13.4678	3.80559	0.846031	4.49816	6.85431e-06	5.88874e-05
Cib4	ENSMUSG00000053194.2	2.89295	3.78582	1.39756	2.70887	0.0067512	0.0250134
Mab21l3	ENSMUSG00000044313.13	252.738	3.78311	0.523914	7.22085	5.16645e-13	1.60177e-11
Smlr1	ENSMUSG00000096546.2	1.20772	3.78107	2.87698	1.31425	0.188763	0.341797
Tarm1	ENSMUSG00000053338.9	27.8448	3.78055	0.916718	4.12401	3.72336e-05	0.000266941
Plekhs1	ENSMUSG00000035818.14	655.311	3.78047	0.256633	14.7311	4.07285e-49	2.51702e-46
4931428L18Rik	ENSMUSG00000086727.8	1.19792	3.77819	2.16898	1.74192	0.0815226	0.183814
Wbscr25	ENSMUSG00000054909.11	1.20474	3.77508	2.26017	1.67027	0.0948669	0.206824
Gzmk	ENSMUSG00000042385.14	1.19559	3.77499	2.29964	1.64156	0.100682	0.216398
Xkr9	ENSMUSG00000067813.3	2.82409	3.76466	1.42168	2.64803	0.00809627	0.0290676
Lncbate1	ENSMUSG00000110613.1	1.86424	3.75318	1.21159	3.09772	0.00195013	0.00876709
Gm12248	ENSMUSG00000086962.4	85.9005	3.75242	0.478205	7.8469	4.26445e-15	1.70762e-13
Gm31401	ENSMUSG00000109566.1	1.18714	3.75163	1.74252	2.15299	0.0313198	0.0872662
AC102496.1	ENSMUSG00000117465.1	389.95	3.7443	0.452275	8.27882	1.24401e-16	5.94431e-15
Serpinb1c	ENSMUSG00000079049.9	5.45719	3.73967	1.01652	3.6789	0.00023424	0.00138438
Junb	ENSMUSG00000052837.6	1.16822	3.73207	1.76824	2.11061	0.0348057	0.094841
Cnga1	ENSMUSG00000067220.12	1.15508	3.71944	2.23561	1.66372	0.0961677	0.208965
Pmepa1os	ENSMUSG00000087600.1	1.1508	3.71234	1.46365	2.53637	0.011201	0.0379299
Scel	ENSMUSG00000022123.9	201.647	3.71227	0.601503	6.17166	6.75777e-10	1.25164e-08
A630031M04Rik	ENSMUSG00000087470.1	4.02691	3.68895	1.08669	3.39466	0.000687129	0.0035397
Mrgpra2b	ENSMUSG00000096719.1	7.99971	3.68508	1.48892	2.47501	0.0133232	0.0437344
Adam28	ENSMUSG00000014725.16	292.731	3.68237	0.385872	9.54299	1.38774e-21	1.15895e-19
Pklr	ENSMUSG00000041237.12	1.12857	3.6817	3.05788	1.204	0.228589	0.393248
Ceacam1	ENSMUSG00000074272.10	4631.35	3.6693	0.198429	18.4918	2.4038e-76	5.57081e-73
F730016J06Rik	ENSMUSG00000086425.7	1.10307	3.65848	2.26136	1.61782	0.105701	0.224684
Ubxn10	ENSMUSG00000043621.13	10.4349	3.65321	0.634716	5.75566	8.63054e-09	1.34012e-07
Etnppl	ENSMUSG00000019232.14	118.345	3.63857	1.42884	2.54652	0.0108803	0.0370265
Slc26a7	ENSMUSG00000040569.13	64.5673	3.62404	0.345602	10.4862	9.99997e-26	1.21176e-23
Gm8439	ENSMUSG00000091297.1	72.7947	3.62259	0.399547	9.06676	1.22611e-19	8.35736e-18
Ly6i	ENSMUSG00000022586.11	4.82538	3.6113	1.94116	1.86038	0.0628321	0.150485
4930556G22Rik	ENSMUSG00000101764.1	46.0151	3.60531	0.565865	6.37132	1.87404e-10	3.7766e-09
Gm28100	ENSMUSG00000100108.1	1.0612	3.60353	2.96688	1.21458	0.224525	0.38795
Scx	ENSMUSG00000034161.8	1.07023	3.60295	1.70877	2.10851	0.0349872	0.0951676
Gm45064	ENSMUSG00000108875.1	1.06778	3.6007	1.7766	2.02674	0.0426888	0.111221
Kiss1	ENSMUSG00000116158.1	4.95349	3.60047	0.993201	3.62511	0.000288837	0.00166202
Slc39a4	ENSMUSG00000063354.7	61.8793	3.60012	0.383488	9.38783	6.12479e-21	4.77116e-19
Gm10530	ENSMUSG00000073528.7	1.69992	3.59738	1.3144	2.7369	0.00620212	0.0232579
Gpr158	ENSMUSG00000045967.11	1.0608	3.59588	2.93296	1.22602	0.22019	0.38267
Meltf	ENSMUSG00000022780.5	1.05938	3.58894	1.51321	2.37174	0.0177046	0.0550836
Gm13021	ENSMUSG00000086437.2	1.05571	3.58742	1.80364	1.98899	0.0467024	0.119314
Gm17783	ENSMUSG00000116542.1	1.05468	3.58653	1.87964	1.9081	0.0563784	0.138481
Gm11665	ENSMUSG00000086222.1	1.05533	3.58629	1.7054	2.1029	0.0354744	0.0961964
Lrrc66	ENSMUSG00000067206.3	3.65546	3.58531	1.06222	3.37531	0.000737319	0.00376789
Stx19	ENSMUSG00000047854.5	1.65646	3.58426	1.56535	2.28975	0.0220361	0.0656937
Nr6a1os	ENSMUSG00000085201.1	200.105	3.58016	0.365726	9.78917	1.25324e-22	1.15597e-20
Gm16322	ENSMUSG00000087456.1	6.96656	3.5788	1.17859	3.03652	0.00239329	0.0104368
Lemd1	ENSMUSG00000079330.8	24.9517	3.57119	0.920395	3.88006	0.000104431	0.000668101
Mmp11	ENSMUSG00000000901.17	1049.07	3.56296	0.277278	12.8498	8.62507e-38	2.71032e-35
Gm17089	ENSMUSG00000092134.1	1.03434	3.56241	1.80009	1.97902	0.0478143	0.121552
Ccdc162	ENSMUSG00000075225.14	1701.22	3.56191	0.472888	7.53226	4.98685e-14	1.79179e-12
Fpr3	ENSMUSG00000079700.7	81.1893	3.55913	1.09513	3.24997	0.00115418	0.00558409
Atp10b	ENSMUSG00000055415.7	1477.17	3.55468	0.338392	10.5046	8.22654e-26	1.01007e-23
Trpv1	ENSMUSG00000005952.15	10.223	3.54756	1.21616	2.91701	0.00353403	0.014544
Serpinb9d	ENSMUSG00000054266.2	1.01612	3.53843	2.22009	1.59382	0.110976	0.233143
Pmel	ENSMUSG00000025359.10	2.44076	3.53351	1.54934	2.28066	0.0225687	0.0670443
Gm20658	ENSMUSG00000093765.7	7.60437	3.53083	2.70323	1.30615	0.191501	0.345731
Csmd2	ENSMUSG00000028804.20	860.852	3.52982	0.365756	9.65075	4.87975e-22	4.2877e-20
Ankrd60	ENSMUSG00000027517.13	1.01572	3.52913	3.0614	1.15278	0.248999	0.417928
Tgm5	ENSMUSG00000053675.8	2.45747	3.5289	1.30114	2.71216	0.00668464	0.0248214
A630023A22Rik	ENSMUSG00000095493.2	239.871	3.5245	0.307071	11.4778	1.70552e-30	2.92782e-28
Gpx2	ENSMUSG00000042808.8	1.00007	3.51805	2.25224	1.56202	0.118283	0.244205
Gm29185	ENSMUSG00000101112.1	0.996544	3.51675	1.83938	1.91192	0.055886	0.137493
Cpvl	ENSMUSG00000052955.5	21.0641	3.50799	0.620789	5.65085	1.59653e-08	2.36797e-07
Scrg1	ENSMUSG00000031610.3	0.990838	3.50615	2.22025	1.57917	0.114298	0.238306
Tspo2	ENSMUSG00000023995.12	7.09863	3.50613	0.837953	4.18417	2.86214e-05	0.00021099
Apoc2	ENSMUSG00000002992.17	8.37064	3.50547	0.936429	3.74344	0.000181516	0.00110049
Nr1h5	ENSMUSG00000048938.12	0.989895	3.50145	3.06208	1.14349	0.252836	0.422714
Muc1	ENSMUSG00000042784.9	78.955	3.49689	0.296815	11.7814	4.86884e-32	9.81178e-30
Art2a-ps	ENSMUSG00000092517.1	0.980667	3.48888	2.97128	1.1742	0.240314	0.407707
Tfap2c	ENSMUSG00000028640.11	0.974515	3.48035	2.95479	1.17787	0.23885	0.405954
Gm34639	ENSMUSG00000113352.1	0.971439	3.47601	2.96013	1.17428	0.240283	0.407692
Tnf	ENSMUSG00000024401.14	6.83097	3.47546	1.28071	2.7137	0.00665374	0.0247166
Celsr2	ENSMUSG00000068740.13	39.2792	3.47393	0.473242	7.3407	2.12479e-13	7.00955e-12
Prm1	ENSMUSG00000022501.6	0.968363	3.47163	2.97536	1.16679	0.243293	0.411069
Myh13	ENSMUSG00000060180.12	0.974112	3.47138	2.98575	1.16265	0.244972	0.413114
Gm10701	ENSMUSG00000074465.2	1443.43	3.47024	0.328726	10.5566	4.73257e-26	6.00971e-24
Gm867	ENSMUSG00000050157.6	4.41547	3.46964	1.04246	3.32833	0.000873694	0.00438102
Cabp4	ENSMUSG00000024842.7	0.965286	3.46717	3.00581	1.15349	0.24871	0.41758
1700027A15Rik	ENSMUSG00000101968.6	23.7604	3.46551	0.511943	6.76932	1.29391e-11	3.17316e-10
B230303A05Rik	ENSMUSG00000113701.1	62.627	3.46424	0.509833	6.79486	1.08421e-11	2.71639e-10
B3galt5	ENSMUSG00000074892.9	72.8563	3.46121	0.398882	8.67727	4.05368e-18	2.29833e-16
Hsd3b1	ENSMUSG00000027871.16	0.964359	3.45804	3.06317	1.12891	0.258935	0.42909
AI463170	ENSMUSG00000112388.1	0.964709	3.45594	2.24457	1.53969	0.123637	0.251976
Galnt13	ENSMUSG00000060988.12	5027.63	3.4487	0.387619	8.89714	5.73053e-19	3.61374e-17
Gjb3	ENSMUSG00000042367.12	0.955161	3.44392	2.4138	1.42676	0.153649	0.29538
Gm13985	ENSMUSG00000086203.1	0.956372	3.44319	1.88464	1.82698	0.0677032	0.159271
Colec10	ENSMUSG00000038591.3	3.34655	3.44121	1.1826	2.90987	0.00361574	0.0148375
Slc25a48	ENSMUSG00000021509.5	177.524	3.43817	0.500352	6.8715	6.35299e-12	1.6566e-10
Esrrb	ENSMUSG00000021255.17	2.30743	3.43767	1.48845	2.30957	0.020912	0.0630216
Gm26642	ENSMUSG00000097680.1	0.9543	3.43725	1.52084	2.26011	0.0238147	0.0700388
Gm43057	ENSMUSG00000104937.1	224.102	3.43189	0.42368	8.10019	5.4874e-16	2.42229e-14
Gm12860	ENSMUSG00000086187.1	23.2308	3.43145	0.48436	7.08451	1.39538e-12	4.03593e-11
Chit1	ENSMUSG00000026450.14	1.48622	3.42939	1.6216	2.11482	0.0344451	0.0940658
Cyp2d34	ENSMUSG00000094559.2	0.944273	3.42702	1.85563	1.84683	0.0647724	0.154111
Gm40603	ENSMUSG00000112679.1	2.29129	3.4184	1.48118	2.30789	0.021005	0.0632606
Cd8b1	ENSMUSG00000053044.8	2.27317	3.41044	1.65643	2.05891	0.0395026	0.104685
Clec4d	ENSMUSG00000030144.4	89.1495	3.40398	0.782135	4.35217	1.34796e-05	0.000107535
Vmn1r33	ENSMUSG00000059375.5	0.918993	3.39741	1.51208	2.24685	0.0246497	0.0720593
Gm18562	ENSMUSG00000110123.1	0.916984	3.39388	1.638	2.07196	0.0382692	0.102229
Htr2b	ENSMUSG00000026228.6	183.748	3.39309	0.254042	13.3564	1.08654e-40	4.1111e-38
Gm43305	ENSMUSG00000105703.2	168.355	3.39109	0.499292	6.7918	1.10743e-11	2.77082e-10
Cldn23	ENSMUSG00000055976.6	20.1577	3.38586	0.563342	6.0103	1.85179e-09	3.21764e-08
Alpl	ENSMUSG00000028766.10	132.072	3.37609	0.454362	7.4304	1.08271e-13	3.71731e-12
Nnat	ENSMUSG00000067786.16	3.22682	3.37519	2.30498	1.46431	0.14311	0.280353
Prokr2	ENSMUSG00000050558.13	0.90208	3.36904	2.34783	1.43496	0.151299	0.292096
Efcab6	ENSMUSG00000022441.17	0.902858	3.35851	3.06579	1.09548	0.273306	0.444503
1700021A07Rik	ENSMUSG00000037535.5	1.43847	3.35723	1.36962	2.45121	0.0142377	0.0462368
Sspn	ENSMUSG00000030255.13	835.057	3.35667	1.05291	3.18799	0.00143264	0.0067159
Obp2a	ENSMUSG00000062061.3	0.892852	3.35628	2.24669	1.49388	0.135208	0.269023
Gm5483	ENSMUSG00000079597.2	0.884753	3.34043	3.04579	1.09674	0.272756	0.443899
Gm10635	ENSMUSG00000111765.1	21.2386	3.33845	0.48081	6.9434	3.82775e-12	1.03299e-10
Gm8801	ENSMUSG00000092284.1	0.881677	3.33577	3.01964	1.10469	0.269293	0.440351
Insl6	ENSMUSG00000050957.4	0.875525	3.32629	3.01071	1.10482	0.269238	0.440299
Sox7	ENSMUSG00000063060.6	45.4033	3.32223	0.396593	8.37693	5.43241e-17	2.70744e-15
Ucp3	ENSMUSG00000032942.14	0.875888	3.31701	3.0299	1.09476	0.273622	0.444878
Mmp8	ENSMUSG00000005800.3	0.866297	3.31165	3.06709	1.07974	0.280259	0.451945
9830107B12Rik	ENSMUSG00000073386.5	0.863221	3.30682	3.06723	1.07811	0.280984	0.452719
Myocos	ENSMUSG00000091060.2	0.86862	3.30581	3.06537	1.07844	0.280837	0.452598
Clca4c-ps	ENSMUSG00000074196.10	3.05239	3.30408	1.13579	2.90906	0.00362516	0.0148696
1700020N01Rik	ENSMUSG00000050844.5	0.870835	3.30181	1.89623	1.74125	0.0816397	0.183913
Robo3	ENSMUSG00000032128.15	1.40084	3.3015	2.45238	1.34624	0.178224	0.328556
Gm30613	ENSMUSG00000105300.1	616.574	3.30128	0.23858	13.8372	1.51985e-43	6.55301e-41
Gm19434	ENSMUSG00000108239.1	0.859806	3.28984	2.34273	1.40428	0.160236	0.304102
Fer1l6	ENSMUSG00000037106.8	9.46549	3.2867	0.827272	3.97293	7.09924e-05	0.000474991
Gm40038	ENSMUSG00000105258.1	0.858004	3.28654	2.28088	1.44091	0.14961	0.289597
Gm33782	ENSMUSG00000112290.1	22.5105	3.28428	0.521898	6.29295	3.11491e-10	6.06623e-09
Fermt1	ENSMUSG00000027356.8	808.229	3.28179	0.37168	8.8296	1.0505e-18	6.40668e-17
Klhl31	ENSMUSG00000044938.8	0.856347	3.2816	1.89453	1.73214	0.0832481	0.186852
7420701I03Rik	ENSMUSG00000113620.1	16.7998	3.2812	0.781185	4.20029	2.66578e-05	0.000197537
Ren1	ENSMUSG00000070645.5	4.09238	3.2743	0.958657	3.41551	0.000636629	0.00331641
Gjb2	ENSMUSG00000046352.7	5.95111	3.26816	0.763676	4.27951	1.87307e-05	0.000143677
Lrrc55	ENSMUSG00000075224.9	29.7943	3.26153	0.747611	4.3626	1.28524e-05	0.00010305
Apol7b	ENSMUSG00000068252.6	2.05557	3.25958	2.31459	1.40827	0.159051	0.302735
Il1rn	ENSMUSG00000026981.15	37.5383	3.25936	0.666813	4.88797	1.01881e-06	1.04763e-05
Ceacam2	ENSMUSG00000054385.14	0.835083	3.2518	3.04633	1.06745	0.285769	0.457606
1700125H20Rik	ENSMUSG00000018479.12	0.834733	3.25159	3.06882	1.05956	0.289345	0.461023
1200007C13Rik	ENSMUSG00000087684.1	1.35036	3.24765	1.84556	1.75972	0.0784561	0.178366
Gstt4	ENSMUSG00000009093.7	4.03922	3.24181	1.12982	2.86931	0.00411372	0.0165083
Gm47751	ENSMUSG00000114724.1	0.82775	3.24074	1.77408	1.82672	0.0677426	0.159344
Gm12694	ENSMUSG00000086251.1	1.31586	3.23612	1.85497	1.74457	0.0810597	0.183028
Cyp21a1	ENSMUSG00000024365.9	0.824116	3.23569	1.82401	1.77395	0.0760719	0.174075
Gm33337	ENSMUSG00000112029.1	1.33649	3.23496	1.62601	1.98951	0.0466448	0.119251
Muc20	ENSMUSG00000035638.14	80.7105	3.22932	0.709474	4.55171	5.32125e-06	4.71361e-05
Treml4	ENSMUSG00000051682.15	23.7378	3.22616	1.58437	2.03624	0.0417264	0.109283
Serpine1	ENSMUSG00000037411.10	996.346	3.21351	0.294848	10.8989	1.1672e-27	1.67751e-25
Bhlhe41	ENSMUSG00000030256.11	2.89214	3.21203	1.16334	2.76104	0.00576172	0.0218183
C230014O12Rik	ENSMUSG00000087461.2	0.80773	3.21157	1.88867	1.70044	0.0890486	0.196496
Gm44275	ENSMUSG00000107768.1	9.49287	3.20908	0.803534	3.99371	6.50487e-05	0.000439185
Xirp2	ENSMUSG00000027022.13	0.806167	3.20445	3.07022	1.04372	0.296615	0.468939
Gm30414	ENSMUSG00000103067.1	138.588	3.20231	0.449204	7.12885	1.01214e-12	2.97385e-11
Gpr33	ENSMUSG00000035148.4	0.797001	3.19138	2.44436	1.30561	0.191687	0.345909
Mgarp	ENSMUSG00000037161.14	0.797912	3.19038	3.07065	1.03899	0.298808	0.471241
4930503B20Rik	ENSMUSG00000090202.1	3.75154	3.1888	0.940991	3.38877	0.000702078	0.00360868
Tnn	ENSMUSG00000026725.17	6.88149	3.18656	1.00443	3.17249	0.00151136	0.00703329
AC183097.1	ENSMUSG00000116719.1	21.1737	3.17671	0.410845	7.73214	1.0575e-14	4.1017e-13
BC048679	ENSMUSG00000061877.13	0.786737	3.17526	2.34969	1.35135	0.176582	0.326367
Ttll8	ENSMUSG00000022388.14	1.27078	3.17311	1.86699	1.69959	0.0892082	0.196778
Trem3	ENSMUSG00000041754.5	1.27874	3.16844	2.32779	1.36114	0.17347	0.322323
Ltbp1	ENSMUSG00000001870.16	52549.8	3.16267	0.17831	17.7369	2.17658e-70	4.03539e-67
4930433N12Rik	ENSMUSG00000042360.12	12.9153	3.16265	0.587456	5.38364	7.29949e-08	9.51706e-07
Kcnh1	ENSMUSG00000058248.12	220.98	3.16113	0.200037	15.8027	2.97976e-56	2.6307e-53
Spink12	ENSMUSG00000061144.5	0.784294	3.15516	3.07174	1.02716	0.304347	0.476812
Prss27	ENSMUSG00000050762.5	1.2576	3.15435	1.44348	2.18524	0.0288715	0.0817966
Gm46329	ENSMUSG00000112704.1	0.77346	3.14843	3.07195	1.0249	0.305412	0.477915
Zfhx2os	ENSMUSG00000093452.4	1.90673	3.14573	1.44454	2.17767	0.0294306	0.0831394
S100g	ENSMUSG00000040808.4	22.1574	3.14239	0.590179	5.32447	1.01247e-07	1.29456e-06
4732490B19Rik	ENSMUSG00000085421.1	4.66336	3.14183	0.807945	3.88867	0.000100795	0.000647516
Cd14	ENSMUSG00000051439.6	1.88488	3.14137	1.28629	2.44221	0.0145978	0.0472163
Gm28175	ENSMUSG00000101299.2	0.777552	3.13972	2.46177	1.27539	0.202169	0.359576
Usp26	ENSMUSG00000055780.10	0.767307	3.13765	3.07229	1.02127	0.307125	0.479782
Gm47882	ENSMUSG00000113811.1	1.93184	3.13456	1.34146	2.33668	0.019456	0.0594552
Fam84a	ENSMUSG00000020607.7	1.2425	3.13305	1.56695	1.99945	0.0455592	0.117185
Lrrc2	ENSMUSG00000032495.8	5.36659	3.13057	1.00237	3.12318	0.0017891	0.0081476
AC165291.1	ENSMUSG00000117019.1	26.5309	3.12478	0.442688	7.05865	1.68131e-12	4.759e-11
Cntn5	ENSMUSG00000039488.15	25.216	3.11775	1.1278	2.76446	0.00570171	0.021636
Hmgcll1	ENSMUSG00000007908.14	1563.01	3.11243	0.162733	19.126	1.53317e-81	5.68499e-78
Gbp11	ENSMUSG00000092021.8	26.8966	3.11075	1.4396	2.16084	0.0307078	0.0859074
Gsto1	ENSMUSG00000025068.7	373.955	3.10771	0.263508	11.7936	4.21268e-32	8.77564e-30
1700027J07Rik	ENSMUSG00000111422.1	82.3208	3.10528	0.553767	5.60757	2.05191e-08	2.97297e-07
Ttc9	ENSMUSG00000042734.6	384.05	3.10314	0.187563	16.5445	1.75388e-61	2.0323e-58
Gm13497	ENSMUSG00000086349.1	0.755906	3.10258	2.38313	1.30189	0.192953	0.347349
Gm29456	ENSMUSG00000099860.1	4.78417	3.09735	1.12217	2.76015	0.0057775	0.0218557
AC183097.4	ENSMUSG00000116992.1	11.9054	3.09617	0.552397	5.60497	2.08287e-08	3.0122e-07
Kcnj15	ENSMUSG00000062609.14	37.4266	3.09377	2.17048	1.42539	0.154045	0.29591
Cxcl10	ENSMUSG00000034855.13	18.2754	3.08579	1.37302	2.24745	0.0246113	0.0719705
Odaph	ENSMUSG00000096035.2	8.99858	3.07908	0.600969	5.12353	2.99875e-07	3.46754e-06
Sftpd	ENSMUSG00000021795.10	125.385	3.07327	0.416551	7.37791	1.608e-13	5.41793e-12
Slc16a11	ENSMUSG00000040938.16	64.1417	3.07084	0.534697	5.74315	9.29338e-09	1.43583e-07
4930461G14Rik	ENSMUSG00000097651.2	0.736364	3.06793	1.97484	1.55351	0.120301	0.247092
Plet1	ENSMUSG00000032068.14	365.788	3.06635	0.506604	6.05276	1.42388e-09	2.51416e-08
Tmprss7	ENSMUSG00000033177.13	42.1583	3.0649	0.512593	5.97921	2.24226e-09	3.8139e-08
BC025446	ENSMUSG00000047728.13	4.9236	3.06281	1.8931	1.61788	0.105689	0.224684
Dgat2	ENSMUSG00000030747.5	497.446	3.0592	0.307767	9.93998	2.78883e-23	2.76496e-21
Gm13030	ENSMUSG00000078518.1	0.730242	3.05798	1.911	1.6002	0.109554	0.230863
Gm30954	ENSMUSG00000109260.1	0.729206	3.05634	1.9109	1.59942	0.109727	0.231069
Gm48444	ENSMUSG00000113224.1	0.727787	3.05392	2.40369	1.27052	0.203901	0.361857
Gm4610	ENSMUSG00000104554.1	3.54479	3.05141	0.960356	3.17737	0.00148618	0.00693003
E230025N22Rik	ENSMUSG00000044719.4	0.725301	3.04917	2.38738	1.2772	0.201531	0.358992
BC035947	ENSMUSG00000090486.2	0.72409	3.04844	1.60783	1.89599	0.0579611	0.141358
Rnf183	ENSMUSG00000063851.12	19.3299	3.04514	0.503855	6.04367	1.50648e-09	2.64991e-08
Ptprz1	ENSMUSG00000068748.7	6625.39	3.03612	0.336451	9.02398	1.8137e-19	1.21394e-17
Gm9255	ENSMUSG00000113814.1	1.16259	3.03096	1.6116	1.88071	0.0600111	0.145173
Nmur2	ENSMUSG00000037393.2	81.8845	3.02893	0.377755	8.01825	1.07262e-15	4.5892e-14
Gm11723	ENSMUSG00000087486.1	1.76701	3.02383	1.38374	2.18525	0.0288705	0.0817966
Nyx	ENSMUSG00000051228.5	1.80991	3.02318	1.25153	2.4156	0.0157094	0.0501726
AC167249.1	ENSMUSG00000116868.1	4.30067	3.0231	0.827359	3.65392	0.00025827	0.00151051
Sectm1b	ENSMUSG00000039364.13	63.3845	3.02142	1.0985	2.75051	0.0059503	0.0224225
Kcnd3os	ENSMUSG00000074346.6	28.146	3.02131	0.407323	7.41749	1.19357e-13	4.07214e-12
Mid1-ps1	ENSMUSG00000095134.2	2.55627	3.02041	1.28954	2.34223	0.0191688	0.0587906
Gm26569	ENSMUSG00000097313.2	75.3946	3.01277	0.325754	9.2486	2.27457e-20	1.66682e-18
Gm38403	ENSMUSG00000112854.1	20.7316	3.00951	0.415146	7.24927	4.19019e-13	1.32119e-11
Fa2h	ENSMUSG00000033579.16	0.701998	3.00554	3.07668	0.97688	0.328628	0.50215
BC030870	ENSMUSG00000074300.4	11.1344	3.00265	0.602005	4.98775	6.10877e-07	6.60388e-06
8030451A03Rik	ENSMUSG00000073821.11	47.6545	3.00177	0.410926	7.30489	2.77494e-13	9.01004e-12
H2-Q2	ENSMUSG00000091705.8	1.73999	2.99956	1.25923	2.38206	0.017216	0.0538983
Tnfrsf11b	ENSMUSG00000063727.3	1020.66	2.9984	0.261985	11.4449	2.49323e-30	4.16436e-28
Inhba	ENSMUSG00000041324.14	177.482	2.9925	0.351522	8.51299	1.695e-17	8.92764e-16
Mei4	ENSMUSG00000043289.12	24.3526	2.99242	0.445513	6.71679	1.85769e-11	4.41496e-10
Rgs1	ENSMUSG00000026358.13	1238.86	2.99029	0.38985	7.67035	1.71528e-14	6.47683e-13
Cideb	ENSMUSG00000022219.10	0.693869	2.98989	3.07722	0.971621	0.331239	0.504574
Ighv1-12	ENSMUSG00000095416.6	2.38169	2.9863	1.824	1.63723	0.101583	0.217968
Psg21	ENSMUSG00000070796.11	0.691797	2.98592	3.07736	0.970285	0.331904	0.50538
2020-03-04	ENSMUSG00000039372.5	19.5859	2.98484	0.427613	6.98025	2.94659e-12	8.04563e-11
Tnr	ENSMUSG00000015829.13	31.4926	2.97964	0.407132	7.3186	2.50564e-13	8.19306e-12
Cd274	ENSMUSG00000016496.7	218.562	2.97623	1.01521	2.93166	0.0033716	0.0139811
Baalc	ENSMUSG00000022296.9	2.37187	2.97552	1.95905	1.51885	0.128799	0.259643
F830045P16Rik	ENSMUSG00000043727.5	102.95	2.97476	0.288257	10.3198	5.73294e-25	6.48102e-23
Gm13662	ENSMUSG00000084794.1	1.69871	2.97339	1.60556	1.85193	0.0640358	0.152717
Gm11685	ENSMUSG00000086733.1	5.05069	2.97231	0.868711	3.42151	0.000622734	0.00325592
Retnlg	ENSMUSG00000022651.6	0.683698	2.97029	3.07791	0.965033	0.334528	0.507999
Gm34354	ENSMUSG00000114854.1	1.71278	2.96983	1.9378	1.53258	0.12538	0.254744
Sprr1a	ENSMUSG00000050359.7	1.12205	2.96716	1.92852	1.53857	0.123909	0.25242
Ccdc73	ENSMUSG00000045106.12	11.5019	2.9608	0.686761	4.31126	1.62328e-05	0.000126558
Phlda1	ENSMUSG00000020205.8	1.6833	2.95828	1.39725	2.11721	0.0342423	0.0936358
Stfa2l1	ENSMUSG00000059657.5	0.677546	2.95817	3.07835	0.96096	0.336572	0.510316
Lbh	ENSMUSG00000024063.13	1681.41	2.95518	0.157374	18.7781	1.14148e-78	3.52717e-75
Hgfac	ENSMUSG00000029102.9	193.336	2.95357	0.426644	6.92279	4.42835e-12	1.18473e-10
Gpr45	ENSMUSG00000041907.9	6.51857	2.94345	0.770452	3.82042	0.000133223	0.000836705
Dsc3	ENSMUSG00000059898.9	0.677143	2.94144	3.07895	0.955338	0.339407	0.513388
1700010J16Rik	ENSMUSG00000100314.6	6.18362	2.93925	1.15041	2.55495	0.0106202	0.0363146
Gm43302	ENSMUSG00000079362.5	415.707	2.93448	0.943293	3.11089	0.00186523	0.00843654
4930405D11Rik	ENSMUSG00000085940.1	1.69925	2.93186	1.59876	1.83383	0.0666791	0.157617
Gm14040	ENSMUSG00000086637.1	82.8345	2.92966	0.300699	9.74281	1.98004e-22	1.79951e-20
Cemip	ENSMUSG00000052353.13	597.726	2.92687	0.443828	6.59462	4.26358e-11	9.6047e-10
Ass1	ENSMUSG00000076441.9	134.558	2.91453	0.359903	8.09808	5.58315e-16	2.45871e-14
A230009B12Rik	ENSMUSG00000089633.2	0.6602	2.9072	3.08021	0.943834	0.345254	0.519628
1700092C10Rik	ENSMUSG00000092499.1	0.660025	2.90712	3.08021	0.943807	0.345268	0.519628
Ctgf	ENSMUSG00000019997.11	189.545	2.9046	0.337085	8.61681	6.88466e-18	3.75416e-16
Gadd45b	ENSMUSG00000015312.9	9.13165	2.89804	0.74412	3.89459	9.83656e-05	0.000633889
4930447F24Rik	ENSMUSG00000102224.5	2.37884	2.8966	1.41163	2.05195	0.0401749	0.106179
Hbegf	ENSMUSG00000024486.5	43.399	2.89475	0.348141	8.31488	9.18437e-17	4.44591e-15
Dnase1l3	ENSMUSG00000025279.7	9.73029	2.89183	0.925888	3.1233	0.00178833	0.00814635
A930104D05Rik	ENSMUSG00000045339.7	1.0648	2.88876	2.4835	1.16318	0.244755	0.412937
Gm36827	ENSMUSG00000112327.1	0.650174	2.88702	3.08096	0.937051	0.348732	0.522921
Gm16302	ENSMUSG00000090023.1	1.61512	2.8863	1.22836	2.34971	0.018788	0.0578621
A330043C09Rik	ENSMUSG00000086044.1	0.65121	2.88622	2.44614	1.17991	0.238036	0.405215
Slc23a4	ENSMUSG00000029847.13	337.778	2.87847	0.29063	9.90423	3.99023e-23	3.89363e-21
Gm38575	ENSMUSG00000111752.1	2.21434	2.87577	1.94786	1.47638	0.139843	0.275466
Gm26903	ENSMUSG00000097836.1	10.9791	2.87132	0.615438	4.66549	3.07882e-06	2.87998e-05
Gm6471	ENSMUSG00000073781.4	0.640834	2.86779	3.08169	0.930592	0.352065	NA
Myh1	ENSMUSG00000056328.14	0.639797	2.86564	3.08177	0.929867	0.35244	NA
AU022754	ENSMUSG00000097209.2	11.0769	2.86528	0.82416	3.4766	0.000507816	0.00272501
A530040E14Rik	ENSMUSG00000072109.11	8.34128	2.86511	1.23798	2.31435	0.0206485	0.0623795
Ccl11	ENSMUSG00000020676.2	2.31437	2.86064	1.11858	2.55739	0.0105461	0.0360814
Gm3693	ENSMUSG00000098128.1	0.636689	2.85914	3.08202	0.927685	0.353571	NA
Ppp1r1b	ENSMUSG00000061718.12	0.636689	2.85914	3.08202	0.927685	0.353571	NA
F10	ENSMUSG00000031444.16	84.9552	2.85791	1.00595	2.841	0.0044972	0.0178044
Tgtp1	ENSMUSG00000078922.9	326.75	2.85736	0.93758	3.04759	0.00230683	0.0101147
Gm15243	ENSMUSG00000085695.1	1.03528	2.85481	1.5469	1.84551	0.0649638	0.154473
Dyrk3	ENSMUSG00000016526.8	15.6908	2.85323	0.54937	5.19364	2.06222e-07	2.47466e-06
1700057G04Rik	ENSMUSG00000074139.8	3.48751	2.85194	1.89873	1.50203	0.13309	0.265864
Nrg1	ENSMUSG00000062991.7	116431	2.84856	0.24549	11.6036	3.95128e-31	7.18203e-29
Ddit4l	ENSMUSG00000046818.7	34.4433	2.84375	0.413431	6.87842	6.05206e-12	1.58258e-10
Ttc39d	ENSMUSG00000046196.4	1.02293	2.84004	1.88578	1.50603	0.132059	0.264547
Serinc2	ENSMUSG00000023232.17	541.101	2.83446	0.409287	6.92537	4.3484e-12	1.16671e-10
A730020E08Rik	ENSMUSG00000097924.2	0.623682	2.83077	1.94987	1.45177	0.146565	NA
Gm47326	ENSMUSG00000111555.1	0.623682	2.83077	1.94987	1.45177	0.146565	NA
Nfe2	ENSMUSG00000058794.12	7.08088	2.8296	2.73265	1.03548	0.300447	0.47282
Gm20186	ENSMUSG00000106874.1	52.0877	2.82955	0.344977	8.20212	2.36177e-16	1.08116e-14
Gm13631	ENSMUSG00000086132.1	0.622471	2.82924	1.99709	1.41668	0.156576	NA
Gm44805	ENSMUSG00000109350.1	10.758	2.82596	0.777793	3.63331	0.000279811	0.00161812
Rgs8	ENSMUSG00000042671.12	0.619362	2.82269	2.51386	1.12285	0.261502	NA
1700061I17Rik	ENSMUSG00000028009.7	1.60621	2.82129	1.38675	2.03447	0.0419047	0.109548
Gm31374	ENSMUSG00000110864.1	0.618358	2.82065	2.40698	1.17186	0.241251	NA
Spdye4b	ENSMUSG00000029586.9	0.618358	2.82065	2.40698	1.17186	0.241251	NA
Dlx5	ENSMUSG00000029755.10	34.9937	2.81957	0.414953	6.79491	1.08376e-11	2.71639e-10
Epcam	ENSMUSG00000045394.9	344.888	2.81955	0.398426	7.07672	1.47606e-12	4.2494e-11
Gm42889	ENSMUSG00000105650.1	2.23821	2.81823	1.18473	2.3788	0.017369	0.0542579
Dclk3	ENSMUSG00000032500.10	61.2896	2.81775	0.785065	3.58919	0.000331709	0.00187447
Camk2n2	ENSMUSG00000051146.2	1.01067	2.8165	1.57806	1.78479	0.0742954	0.170983
Tekt5	ENSMUSG00000039179.13	0.616286	2.81554	3.08372	0.913034	0.361225	NA
Gm35066	ENSMUSG00000106361.1	2.94255	2.81503	1.19787	2.35003	0.0187719	0.0578219
Arhgef38	ENSMUSG00000040969.14	1641.7	2.81483	0.334302	8.42002	3.76409e-17	1.90673e-15
Gm30292	ENSMUSG00000104109.1	0.6149	2.8132	2.45467	1.14606	0.25177	NA
Gm29630	ENSMUSG00000101549.1	0.612827	2.80899	2.45521	1.14409	0.252586	NA
Cdh17	ENSMUSG00000028217.11	7.14745	2.8079	0.902006	3.11296	0.00185223	0.00839002
Hao1	ENSMUSG00000027261.2	1.00248	2.80231	1.97696	1.41748	0.156342	0.298975
Mfsd4a	ENSMUSG00000059149.17	4500.58	2.80213	0.244194	11.475	1.76077e-30	2.99493e-28
Gm18204	ENSMUSG00000109595.1	0.609368	2.80012	3.08433	0.907854	0.363955	NA
Gm45145	ENSMUSG00000109076.1	14.3263	2.79903	0.907446	3.08451	0.00203886	0.00909979
Gprc5a	ENSMUSG00000046733.7	72.3641	2.79535	0.317806	8.79576	1.42088e-18	8.41631e-17
Fam3b	ENSMUSG00000022938.8	41.2402	2.79223	0.462503	6.03721	1.56801e-09	2.75292e-08
Sprr2g	ENSMUSG00000046203.11	0.604108	2.7915	2.41033	1.15814	0.246806	NA
Rnf128	ENSMUSG00000031438.11	2472.04	2.78825	0.340372	8.19176	2.57432e-16	1.17556e-14
1700061N14Rik	ENSMUSG00000110464.1	0.601032	2.78478	2.4584	1.13276	0.257314	NA
Gm48843	ENSMUSG00000112266.1	2.34371	2.78284	1.29787	2.14415	0.0320206	0.0888448
C230072F16Rik	ENSMUSG00000112121.1	79.4261	2.77946	1.06968	2.59841	0.00936557	0.0327186
Gm14064	ENSMUSG00000085640.1	3.61239	2.77386	0.986996	2.81041	0.00494788	0.0192799
AC165271.1	ENSMUSG00000116641.1	53.0027	2.77325	0.354812	7.8161	5.44849e-15	2.17236e-13
Chchd10	ENSMUSG00000049422.7	5.39855	2.77089	0.785126	3.52923	0.000416778	0.00228882
Entpd4	ENSMUSG00000095463.8	0.595883	2.77078	3.08551	0.897998	0.369187	NA
Olah	ENSMUSG00000026645.11	0.973891	2.77036	2.50472	1.10605	0.268703	0.439774
Gm14206	ENSMUSG00000086163.1	1.49507	2.76801	1.46958	1.88354	0.0596277	0.144415
Cd7	ENSMUSG00000025163.6	0.593937	2.76668	3.08568	0.896619	0.369922	NA
Gm5532	ENSMUSG00000073535.5	0.593937	2.76668	3.08568	0.896619	0.369922	NA
Otop1	ENSMUSG00000051596.13	0.593937	2.76668	3.08568	0.896619	0.369922	NA
Pglyrp4	ENSMUSG00000042250.13	0.593937	2.76668	3.08568	0.896619	0.369922	NA
Cd24a	ENSMUSG00000047139.9	168.915	2.76301	0.328137	8.4203	3.75528e-17	1.90673e-15
Macc1	ENSMUSG00000041886.7	1596.88	2.76129	0.341918	8.07589	6.6989e-16	2.9223e-14
Clmn	ENSMUSG00000021097.15	2314.51	2.75938	0.639413	4.31548	1.59254e-05	0.000124319
Dusp10	ENSMUSG00000039384.8	363.44	2.75531	0.218393	12.6163	1.71738e-36	5.054e-34
Cd8a	ENSMUSG00000053977.13	3.139	2.75404	2.32184	1.18615	0.235565	0.402035
AC183097.2	ENSMUSG00000116812.1	35.313	2.75211	0.316685	8.69035	3.61311e-18	2.05482e-16
4930519L02Rik	ENSMUSG00000105652.1	4.46288	2.75132	0.847508	3.24637	0.00116887	0.0056449
Slc34a2	ENSMUSG00000029188.14	182.956	2.74915	0.566442	4.85336	1.21387e-06	1.22711e-05
Tnni1	ENSMUSG00000026418.16	1.52249	2.74656	1.89768	1.44733	0.147805	0.286977
Gm29040	ENSMUSG00000099576.1	0.584709	2.74588	3.08653	0.889632	0.373663	NA
Krt6b	ENSMUSG00000023041.7	0.584709	2.74588	3.08653	0.889632	0.373663	NA
Gm43069	ENSMUSG00000107179.1	0.581633	2.73889	3.08682	0.887284	0.374926	NA
Olfr754-ps1	ENSMUSG00000092340.3	0.581633	2.73889	3.08682	0.887284	0.374926	NA
1700003I16Rik	ENSMUSG00000107526.1	2.75478	2.7257	1.39144	1.95891	0.0501231	0.12621
Il21	ENSMUSG00000027718.8	0.575481	2.72482	3.08741	0.882559	0.377474	NA
Psg22	ENSMUSG00000044903.15	0.575481	2.72482	3.08741	0.882559	0.377474	NA
Kng1	ENSMUSG00000022875.18	43.2857	2.72461	0.448229	6.07861	1.21226e-09	2.16734e-08
Cxcr4	ENSMUSG00000045382.6	11.8046	2.72438	0.93826	2.90365	0.00368843	0.015079
Prg4	ENSMUSG00000006014.16	9.08392	2.7243	1.08258	2.5165	0.0118527	0.0397354
Grip1	ENSMUSG00000034813.17	22193.3	2.723	0.43015	6.33036	2.44596e-10	4.83455e-09
Msc	ENSMUSG00000025930.6	55.9985	2.71787	0.387904	7.00656	2.44255e-12	6.77918e-11
Gm20547	ENSMUSG00000092511.7	766.783	2.71526	0.822259	3.3022	0.000959299	0.004758
Gm4651	ENSMUSG00000097011.2	0.957218	2.71461	1.96258	1.38318	0.166608	0.312675
Cd300e	ENSMUSG00000048498.7	1.45398	2.70755	2.00069	1.35331	0.175957	0.325495
Gm44172	ENSMUSG00000108213.1	1.45691	2.70139	1.38746	1.94701	0.0515337	0.129043
1700069L16Rik	ENSMUSG00000042184.11	1.45818	2.70083	2.07404	1.3022	0.192847	0.347226
Myb	ENSMUSG00000019982.15	751.031	2.69691	0.44083	6.11779	9.48835e-10	1.71666e-08
Gm28800	ENSMUSG00000099760.1	1.45615	2.69535	1.50007	1.79681	0.0723656	0.167582
4833423E24Rik	ENSMUSG00000075217.1	118.835	2.69227	0.272733	9.87144	5.53635e-23	5.31834e-21
Gm37306	ENSMUSG00000103043.1	0.943908	2.69215	1.61058	1.67154	0.0946143	0.206346
Ndp	ENSMUSG00000040138.7	0.957886	2.69163	1.64685	1.63442	0.102172	0.218813
Rassf6	ENSMUSG00000029370.10	198.176	2.69114	0.480789	5.59733	2.17676e-08	3.14063e-07
Gm26665	ENSMUSG00000097196.2	1.46472	2.6892	1.84935	1.45413	0.145911	0.284337
Gm20500	ENSMUSG00000092266.1	0.934247	2.68824	1.46275	1.8378	0.0660922	0.156614
Coch	ENSMUSG00000020953.17	2.80829	2.67792	1.66043	1.61279	0.106791	0.226508
Slc6a14	ENSMUSG00000031089.7	19.9682	2.67096	0.633351	4.21718	2.47375e-05	0.000184933
Atf3	ENSMUSG00000026628.13	987.784	2.66629	0.408902	6.52062	7.00182e-11	1.51475e-09
Gm4755	ENSMUSG00000096940.1	0.55858	2.66337	3.09005	0.86192	0.388732	NA
Gm35439	ENSMUSG00000105476.1	0.911905	2.66146	1.66517	1.59831	0.109973	0.231457
Adamdec1	ENSMUSG00000022057.8	5.56462	2.66136	0.821221	3.24073	0.00119222	0.00573084
Efna4	ENSMUSG00000028040.7	14.1785	2.65601	0.539659	4.92165	8.58189e-07	8.96385e-06
Gm12530	ENSMUSG00000085967.1	1.41037	2.65433	1.49159	1.77953	0.0751529	0.172421
Il1a	ENSMUSG00000027399.1	101.922	2.65256	0.512336	5.17738	2.25025e-07	2.67949e-06
1700086L19Rik	ENSMUSG00000071265.10	6.54519	2.65058	0.864528	3.06593	0.00216995	0.00959201
Gm47499	ENSMUSG00000110923.1	77.1646	2.64706	0.357065	7.41337	1.23129e-13	4.18866e-12
Scin	ENSMUSG00000002565.16	534.794	2.64639	0.395311	6.69445	2.16482e-11	5.08048e-10
Efna3	ENSMUSG00000028039.11	1.95929	2.6462	1.57262	1.68267	0.0924385	0.20241
3830432H09Rik	ENSMUSG00000101731.1	9.69843	2.64541	0.714156	3.70425	0.000212016	0.00126351
Sgcg	ENSMUSG00000035296.14	65.0759	2.64279	0.465559	5.67659	1.37408e-08	2.06446e-07
Rmst	ENSMUSG00000112117.1	1995.32	2.64269	0.392526	6.73251	1.66755e-11	3.99437e-10
Cfb	ENSMUSG00000090231.10	671.342	2.642	0.775107	3.40856	0.000653062	0.00339248
4930515B02Rik	ENSMUSG00000087045.1	0.544059	2.62862	3.09159	0.850248	0.395187	NA
Gm35934	ENSMUSG00000110530.1	0.544059	2.62862	3.09159	0.850248	0.395187	NA
Gm281	ENSMUSG00000084902.2	8.32543	2.62736	1.0809	2.43072	0.0150688	0.0485027
Gm15984	ENSMUSG00000085657.7	0.544712	2.62705	2.56332	1.02486	0.305429	NA
Gm26834	ENSMUSG00000097307.1	0.544712	2.62705	2.56332	1.02486	0.305429	NA
Krt19	ENSMUSG00000020911.14	460.875	2.62149	0.410324	6.38884	1.67153e-10	3.3832e-09
Gm47431	ENSMUSG00000112139.1	1.37754	2.61858	1.97031	1.32902	0.183842	0.335541
Slc44a4	ENSMUSG00000007034.15	248.5	2.61811	0.384194	6.81454	9.45685e-12	2.39195e-10
Gm17171	ENSMUSG00000091457.1	189.613	2.61566	0.813916	3.21367	0.00131051	0.00622038
1700016P03Rik	ENSMUSG00000085609.1	13.5769	2.61551	0.505496	5.17414	2.28963e-07	2.71418e-06
Trim6	ENSMUSG00000072244.11	207.091	2.61454	0.305486	8.55865	1.14202e-17	6.0842e-16
Mmp10	ENSMUSG00000047562.3	4.54153	2.61349	1.14006	2.29242	0.0218816	0.0653381
Gm39214	ENSMUSG00000109754.1	24.7413	2.61313	0.528628	4.94322	7.68427e-07	8.11774e-06
Gm12695	ENSMUSG00000078639.1	0.537316	2.61225	3.09233	0.844753	0.398249	NA
Gm31887	ENSMUSG00000105715.1	1.35306	2.61128	1.66935	1.56425	0.117759	0.243395
Cers3	ENSMUSG00000030510.11	104.432	2.60919	0.479017	5.44697	5.12357e-08	6.86351e-07
Trpc7	ENSMUSG00000021541.14	0.535755	2.6085	3.0925	0.843494	0.398952	NA
Cfap161	ENSMUSG00000011154.17	27.4763	2.60526	0.464305	5.6111	2.01046e-08	2.92431e-07
Sytl3	ENSMUSG00000041831.16	593.942	2.60262	0.211986	12.2773	1.1993e-34	2.96467e-32
Tmc1	ENSMUSG00000024749.8	11.5438	2.60146	0.503445	5.16732	2.37473e-07	2.80251e-06
Erich3	ENSMUSG00000078161.8	99.4113	2.60077	0.492507	5.28069	1.28698e-07	1.60786e-06
Gm10371	ENSMUSG00000072589.4	3.32511	2.59768	0.976354	2.6606	0.00780026	0.028163
D030045P18Rik	ENSMUSG00000110874.1	0.530399	2.59457	3.09313	0.838815	0.401573	NA
Prl2c3	ENSMUSG00000056457.6	0.530399	2.59457	3.09313	0.838815	0.401573	NA
Nr4a3	ENSMUSG00000028341.9	402.802	2.59359	0.305935	8.47759	2.29909e-17	1.19398e-15
4930434F21Rik	ENSMUSG00000111655.1	0.530224	2.59327	2.56904	1.00943	0.312766	NA
Spag6l	ENSMUSG00000022783.11	19.757	2.58959	0.614674	4.21294	2.5207e-05	0.000188063
Gm30873	ENSMUSG00000109341.1	5.2362	2.58635	0.731587	3.53527	0.000407364	0.0022431
Pglyrp2	ENSMUSG00000079563.9	0.865673	2.58595	2.42367	1.06695	0.285993	0.457829
Cited2	ENSMUSG00000039910.10	3.343	2.58469	0.935791	2.76204	0.00574411	0.0217694
A930029G22Rik	ENSMUSG00000096988.1	0.526732	2.58286	2.04091	1.26555	0.205676	NA
2010300F17Rik	ENSMUSG00000097289.1	2.07649	2.58249	2.02531	1.27511	0.202271	0.359722
Slc13a2os	ENSMUSG00000085747.1	0.870665	2.5808	2.42702	1.06336	0.287618	0.459411
Gm45304	ENSMUSG00000110329.1	17.6324	2.57912	0.5752	4.48388	7.32992e-06	6.25387e-05
Slc37a1	ENSMUSG00000024036.15	478.071	2.5769	0.287845	8.95238	3.47891e-19	2.24735e-17
Gm29020	ENSMUSG00000102074.1	0.521409	2.57251	2.57273	0.999912	0.317353	NA
Gm37065	ENSMUSG00000104413.1	0.519432	2.56771	3.09438	0.829798	0.406653	NA
Gm45627	ENSMUSG00000109846.1	0.519607	2.5676	2.52835	1.01553	0.309855	NA
Apol11b	ENSMUSG00000091694.9	1.35614	2.56616	3.05705	0.839422	0.401232	0.573342
Plat	ENSMUSG00000031538.6	863.426	2.5656	0.142023	18.0646	6.05086e-73	1.24648e-69
Gm43151	ENSMUSG00000106750.1	0.51736	2.56287	2.52944	1.01322	0.310956	NA
Krt8	ENSMUSG00000049382.10	93.8059	2.56127	0.363907	7.03827	1.94644e-12	5.48436e-11
Crlf1	ENSMUSG00000007888.15	1.34876	2.56078	1.65898	1.54359	0.122688	0.250758
Gm28888	ENSMUSG00000100908.1	0.516356	2.56025	2.57486	0.994328	0.320063	NA
Gm15895	ENSMUSG00000085068.1	0.51532	2.55885	2.04168	1.2533	0.210095	NA
Gm3764	ENSMUSG00000097156.7	1.95096	2.55604	1.91098	1.33756	0.181041	0.332261
Adm	ENSMUSG00000030790.15	8.16573	2.55136	0.712745	3.57962	0.000344092	0.00193669
Dmbt1	ENSMUSG00000047517.11	1.93445	2.54884	2.35046	1.0844	0.278187	0.450094
Gm12106	ENSMUSG00000079890.2	0.511207	2.54781	2.53189	1.00629	0.314278	NA
Gja1	ENSMUSG00000050953.10	11165.7	2.54192	0.256186	9.92216	3.33451e-23	3.28839e-21
Adgrg5	ENSMUSG00000061577.12	26.8273	2.5414	0.820686	3.09667	0.00195705	0.00879394
Gm43915	ENSMUSG00000108171.1	0.508815	2.54047	3.09566	0.820656	0.411842	NA
Gm28818	ENSMUSG00000101211.1	7.6892	2.53688	0.762197	3.32838	0.000873541	0.00438102
Dusp18	ENSMUSG00000047205.12	0.505739	2.53412	2.57946	0.982425	0.32589	NA
E230013L22Rik	ENSMUSG00000096957.1	0.504082	2.53412	2.04245	1.24073	0.214707	NA
Ankrd66	ENSMUSG00000096140.2	3.78331	2.5337	1.30457	1.94217	0.0521164	0.130116
Gm16325	ENSMUSG00000085810.7	0.505118	2.53295	2.53445	0.99941	0.317596	NA
2410017I17Rik	ENSMUSG00000038311.13	3.97722	2.53188	1.34037	1.88894	0.0589003	0.143102
4930532G15Rik	ENSMUSG00000097261.2	0.854562	2.52987	1.99519	1.26798	0.204804	0.363147
Ldhd	ENSMUSG00000031958.16	41.2023	2.5287	0.392886	6.43623	1.22481e-10	2.56009e-09
Filip1l	ENSMUSG00000043336.14	6285.56	2.52818	0.571135	4.42659	9.57339e-06	7.90957e-05
Gm48912	ENSMUSG00000115158.1	0.845592	2.52795	2.06204	1.22595	0.220219	0.382685
Gm8075	ENSMUSG00000113321.1	6.94942	2.52241	0.762517	3.30801	0.000939624	0.00467417
AC151266.1	ENSMUSG00000117096.1	0.498997	2.51778	2.58263	0.974891	0.329615	NA
Anxa10	ENSMUSG00000031635.14	0.49997	2.51758	3.09676	0.812974	0.416233	NA
Gpr55	ENSMUSG00000049608.8	3.35419	2.5133	1.12905	2.22604	0.0260116	0.0753642
Has1	ENSMUSG00000003665.7	119.305	2.51305	0.413111	6.08325	1.17773e-09	2.11171e-08
Parvaos	ENSMUSG00000085049.1	8.91064	2.51247	0.54957	4.5717	4.83775e-06	4.33294e-05
Gm41206	ENSMUSG00000115532.1	1.9905	2.5109	1.21376	2.06869	0.0385749	0.102815
Gm11545	ENSMUSG00000075611.5	0.495921	2.51039	2.53849	0.988929	0.322698	NA
Rgs4	ENSMUSG00000038530.11	125.254	2.50934	0.27077	9.26742	1.90702e-20	1.40861e-18
Cblc	ENSMUSG00000040525.13	250.975	2.50897	0.563775	4.4503	8.5749e-06	7.17089e-05
Gm9961	ENSMUSG00000055015.5	0.494947	2.50468	3.09738	0.808644	0.41872	NA
Tmsb15b1	ENSMUSG00000089768.2	0.494947	2.50468	3.09738	0.808644	0.41872	NA
E030013I19Rik	ENSMUSG00000086843.3	148.739	2.50279	0.343488	7.28641	3.1833e-13	1.02819e-11
Chsy1	ENSMUSG00000032640.10	0.853811	2.50136	1.66875	1.49895	0.133887	0.267026
Gbp4	ENSMUSG00000079363.7	2652.92	2.49781	0.965421	2.58728	0.00967379	0.0336369
Sele	ENSMUSG00000026582.6	1.79777	2.49776	1.41173	1.7693	0.0768446	0.175391
Snhg7os	ENSMUSG00000086775.7	11.4022	2.49732	0.802508	3.11189	0.00185893	0.00841831
Gm16120	ENSMUSG00000087248.7	0.491871	2.49652	3.09778	0.805905	0.420297	NA
Iigp1	ENSMUSG00000054072.11	2503.34	2.49633	0.876246	2.84889	0.00438721	0.0174173
Wfdc8	ENSMUSG00000070533.11	32.2152	2.49563	0.683598	3.65073	0.000261497	0.00152794
Fosb	ENSMUSG00000003545.3	98.6089	2.4946	0.589595	4.23104	2.32615e-05	0.000174744
Slco4a1	ENSMUSG00000038963.15	808.589	2.49321	0.503613	4.95064	7.39689e-07	7.85893e-06
Tmprss11g	ENSMUSG00000079451.9	106.913	2.49263	0.403276	6.18095	6.37188e-10	1.18371e-08
Aoc1	ENSMUSG00000029811.14	21.5587	2.49208	0.587816	4.23955	2.23972e-05	0.000168867
Cma2	ENSMUSG00000068289.6	0.489769	2.49074	3.09807	0.803966	0.421417	NA
Gm26972	ENSMUSG00000097980.1	0.823771	2.49066	1.63312	1.5251	0.127235	0.257497
Rab26os	ENSMUSG00000093565.1	0.822426	2.4897	1.73022	1.43895	0.150165	0.29043
Htr1b	ENSMUSG00000049511.5	0.838953	2.48967	1.72509	1.44321	0.148962	0.288554
Pigr	ENSMUSG00000026417.13	367.889	2.48947	0.503595	4.9434	7.67716e-07	8.11485e-06
Ceacam19	ENSMUSG00000049848.7	0.488795	2.48832	3.09819	0.803154	0.421886	NA
Gm31126	ENSMUSG00000114035.1	0.829457	2.48659	1.51038	1.64633	0.0996964	0.214652
Inhbb	ENSMUSG00000037035.5	155.827	2.48569	0.316548	7.85249	4.07868e-15	1.64747e-13
Noxo1	ENSMUSG00000019320.14	98.0074	2.48559	0.51788	4.79954	1.5903e-06	1.56747e-05
Map3k7cl	ENSMUSG00000025610.7	169.577	2.48469	0.334983	7.41735	1.19484e-13	4.07214e-12
Galnt3	ENSMUSG00000026994.9	236.773	2.48117	0.302974	8.18941	2.62514e-16	1.1929e-14
Gm5796	ENSMUSG00000096775.1	2.47614	2.4808	1.24282	1.99611	0.0459218	0.117823
A530021J07Rik	ENSMUSG00000053528.6	0.485719	2.48008	3.09859	0.800389	0.423485	NA
Synpo2l	ENSMUSG00000039376.13	0.485719	2.48008	3.09859	0.800389	0.423485	NA
Plch1	ENSMUSG00000036834.16	11881.6	2.47512	0.29746	8.32086	8.73297e-17	4.24959e-15
Tmem45b	ENSMUSG00000041737.8	1137.27	2.47472	0.403959	6.12618	9.0014e-10	1.63453e-08
Gm31408	ENSMUSG00000111853.1	0.819876	2.47346	1.66928	1.48175	0.138407	0.273524
Ccl4	ENSMUSG00000018930.3	2.31056	2.47175	1.69643	1.45703	0.145108	0.283339
Gm34643	ENSMUSG00000115855.1	1.25404	2.47139	2.01273	1.22788	0.219491	0.381813
Cldn7	ENSMUSG00000018569.12	384.472	2.47059	0.380678	6.48996	8.58596e-11	1.8318e-09
Gm48089	ENSMUSG00000112544.1	1.28885	2.47034	1.54781	1.59602	0.110483	0.232214
Ccdc7a	ENSMUSG00000025808.17	0.82467	2.46832	1.72259	1.43291	0.151883	0.292867
Mal2	ENSMUSG00000024479.3	267.356	2.46828	0.378924	6.51393	7.32098e-11	1.58195e-09
Gm42031	ENSMUSG00000110386.1	0.831336	2.46824	1.66383	1.48347	0.137948	0.272719
Cd300lf	ENSMUSG00000047798.15	302.976	2.46741	0.969286	2.54559	0.0109092	0.0371146
Adprhl1	ENSMUSG00000031448.12	0.479567	2.46349	3.09942	0.794822	0.426717	NA
Cacna1f	ENSMUSG00000031142.17	0.479567	2.46349	3.09942	0.794822	0.426717	NA
Fam89a	ENSMUSG00000043068.6	0.805004	2.46217	1.97749	1.2451	0.213095	0.373667
Mmp13	ENSMUSG00000050578.10	1.25966	2.46012	2.03292	1.21014	0.226225	0.390159
Erfe	ENSMUSG00000047443.14	3.64192	2.45898	0.828781	2.96699	0.00300734	0.0126776
Fer1l4	ENSMUSG00000013338.16	126.232	2.45858	0.445221	5.52216	3.34851e-08	4.60886e-07
Aloxe3	ENSMUSG00000020892.10	23.5823	2.45703	0.465416	5.27922	1.29734e-07	1.61863e-06
Lman1l	ENSMUSG00000056271.13	1.27704	2.45221	1.89994	1.29068	0.196816	0.352455
Gbp5	ENSMUSG00000105504.4	984.896	2.45191	0.834169	2.93935	0.003289	0.0136875
Dusp27	ENSMUSG00000026564.9	1.24052	2.44743	1.90774	1.28289	0.199529	0.356248
Rubie	ENSMUSG00000085123.2	2.40581	2.44487	1.02354	2.38864	0.016911	0.0531406
Sox9	ENSMUSG00000000567.5	3.54162	2.44329	1.25001	1.95461	0.0506289	0.1273
Vmn1r39	ENSMUSG00000093755.2	28.4119	2.44266	0.540278	4.52111	6.15149e-06	5.34687e-05
Gm44698	ENSMUSG00000109366.1	6.65198	2.44097	0.640256	3.81249	0.000137572	0.000861393
Gm20541	ENSMUSG00000092390.1	1.28213	2.43962	1.54765	1.57633	0.114949	0.239429
Dcstamp	ENSMUSG00000022303.9	2.28699	2.43954	1.48601	1.64168	0.100657	0.216369
Macrod2os1	ENSMUSG00000086450.1	1.91789	2.43832	1.21686	2.00379	0.0450931	0.116282
Gm14406	ENSMUSG00000078865.8	2.46546	2.43715	1.13179	2.15335	0.0312914	0.0872003
Slco1a5	ENSMUSG00000063975.13	2.90154	2.43417	1.62426	1.49863	0.133968	0.267138
Gm47719	ENSMUSG00000112599.1	2.40647	2.43279	1.76174	1.3809	0.167309	0.313704
Gm14862	ENSMUSG00000079694.2	0.80261	2.43159	1.92267	1.26469	0.205982	0.364364
Gm37821	ENSMUSG00000104188.1	10.9446	2.4282	0.873058	2.78126	0.00541476	0.020761
Gm4606	ENSMUSG00000115611.1	2.93804	2.42715	0.926495	2.61971	0.00880038	0.031072
Gm45397	ENSMUSG00000109973.1	76.5897	2.42704	0.268928	9.02487	1.79906e-19	1.2085e-17
Snai3	ENSMUSG00000006587.6	1.25629	2.42643	1.40769	1.7237	0.0847614	0.189129
4933417E11Rik	ENSMUSG00000101848.1	69.6621	2.4256	0.491547	4.93463	8.03046e-07	8.43062e-06
Slamf8	ENSMUSG00000053318.7	11.6106	2.42548	0.995861	2.43556	0.0148687	0.0479334
Kcnc2	ENSMUSG00000035681.7	9709.55	2.42474	0.407394	5.95182	2.6518e-09	4.44123e-08
Wfdc18	ENSMUSG00000000983.13	9.20405	2.42452	0.824493	2.94062	0.00327552	0.0136468
Tnip3	ENSMUSG00000044162.12	486.029	2.42409	0.787084	3.07983	0.00207119	0.00921964
A430108G06Rik	ENSMUSG00000086851.1	1.23557	2.42305	1.9004	1.27502	0.2023	0.35974
Bhlhe40	ENSMUSG00000030103.11	158.198	2.42173	0.237537	10.1952	2.08315e-24	2.20694e-22
C330021F23Rik	ENSMUSG00000065952.13	3.48946	2.4193	1.0641	2.27356	0.0229926	0.0680419
AC124316.1	ENSMUSG00000117466.1	31.2436	2.41524	0.87711	2.75364	0.00589374	0.022241
Doc2b	ENSMUSG00000020848.7	5.96705	2.41311	0.672054	3.59065	0.000329861	0.00186565
Vcam1	ENSMUSG00000027962.14	138.56	2.41183	0.870919	2.76929	0.00561779	0.0213842
Tjp3	ENSMUSG00000034917.8	283.25	2.40936	0.410303	5.87216	4.30165e-09	6.97749e-08
Lrg1	ENSMUSG00000037095.8	5.39342	2.40842	0.808518	2.97881	0.00289372	0.0122768
Enpp3	ENSMUSG00000019989.8	1585.94	2.40756	0.221653	10.8619	1.75137e-27	2.45988e-25
Dsp	ENSMUSG00000054889.10	469.176	2.40719	0.391087	6.15513	7.50146e-10	1.37973e-08
Gm39185	ENSMUSG00000110468.1	1.2499	2.40613	1.41717	1.69784	0.089538	0.197365
Gm13986	ENSMUSG00000087203.7	481.611	2.40424	0.205968	11.6729	1.75364e-31	3.3176e-29
Megf11	ENSMUSG00000036466.17	370.829	2.40056	0.340041	7.05962	1.66959e-12	4.74032e-11
Gm28721	ENSMUSG00000101951.1	1.24534	2.39981	1.59623	1.50343	0.132728	0.265342
Bdnf	ENSMUSG00000048482.14	1794.84	2.38812	0.350517	6.81312	9.55049e-12	2.41234e-10
Aldoc	ENSMUSG00000017390.15	4.29157	2.38608	1.22323	1.95063	0.0511012	0.128237
Tenm1	ENSMUSG00000016150.15	222.88	2.38535	0.384782	6.19923	5.67406e-10	1.05939e-08
Ildr1	ENSMUSG00000022900.14	783.056	2.38385	0.669673	3.55972	0.000371247	0.00206686
A230108P19Rik	ENSMUSG00000087125.1	12.3533	2.37913	0.566689	4.19831	2.6892e-05	0.000199192
Fcrl5	ENSMUSG00000048031.15	0.777059	2.37894	2.53898	0.936966	0.348776	0.522921
Cdkn2b	ENSMUSG00000073802.5	3.62542	2.36846	0.912686	2.59505	0.00945783	0.0329817
F5	ENSMUSG00000026579.8	63.8058	2.36386	0.384378	6.14984	7.75625e-10	1.42236e-08
Serpina3g	ENSMUSG00000041481.16	115.082	2.35768	1.25445	1.87946	0.0601821	0.14553
Clstn3	ENSMUSG00000008153.11	2.82529	2.35453	1.2442	1.89241	0.0584362	0.142191
9130015G15Rik	ENSMUSG00000108950.1	0.451429	2.3526	3.1052	0.757632	0.448671	NA
B230323A14Rik	ENSMUSG00000097623.7	0.451429	2.3526	3.1052	0.757632	0.448671	NA
Glyat	ENSMUSG00000063683.12	0.451429	2.3526	3.1052	0.757632	0.448671	NA
Fcgr4	ENSMUSG00000059089.4	29.5029	2.35063	0.777761	3.02231	0.00250855	0.0108513
Add2	ENSMUSG00000030000.10	333.981	2.34894	0.29918	7.85126	4.11879e-15	1.66005e-13
Cilp	ENSMUSG00000042254.14	61.5951	2.34501	0.420049	5.5827	2.36813e-08	3.38774e-07
Gm21847	ENSMUSG00000094230.5	309.323	2.34214	0.288956	8.10554	5.25123e-16	2.32913e-14
Rho	ENSMUSG00000030324.8	1.1706	2.3413	2.06695	1.13273	0.257327	0.42744
Gckr	ENSMUSG00000059434.9	5.84192	2.33802	1.37195	1.70417	0.0883501	0.195366
Dennd2d	ENSMUSG00000027901.12	227.758	2.33534	0.2347	9.95033	2.51344e-23	2.50533e-21
Gm28095	ENSMUSG00000100868.1	1.16256	2.33386	2.01704	1.15707	0.247242	0.415846
Gm32885	ENSMUSG00000116295.1	0.444686	2.33308	3.10626	0.75109	0.452599	NA
Gm16026	ENSMUSG00000079455.9	1.61331	2.33293	1.89025	1.23419	0.21713	0.37888
Gm43391	ENSMUSG00000106004.4	161.305	2.32698	0.352433	6.60261	4.03986e-11	9.13402e-10
Inava	ENSMUSG00000041605.16	296.338	2.3266	0.431938	5.38643	7.18705e-08	9.38366e-07
Nr4a1	ENSMUSG00000023034.7	309.059	2.32631	0.217723	10.6847	1.1999e-26	1.58902e-24
Cpm	ENSMUSG00000020183.11	269.368	2.32049	0.435098	5.33327	9.64614e-08	1.23781e-06
Drd3	ENSMUSG00000022705.5	0.440016	2.31947	3.10701	0.74653	0.455347	NA
Gm14547	ENSMUSG00000086834.1	0.440016	2.31947	3.10701	0.74653	0.455347	NA
Gm26799	ENSMUSG00000097579.1	53.708	2.31781	0.267291	8.67147	4.26573e-18	2.38378e-16
Tsks	ENSMUSG00000059891.14	1.15354	2.31626	2.44002	0.949278	0.342479	0.516771
Gm15283	ENSMUSG00000087700.2	58.2907	2.31588	0.432716	5.35197	8.70032e-08	1.12407e-06
Gjb6	ENSMUSG00000040055.9	0.437944	2.31335	3.10735	0.744479	0.456587	NA
Gm15347	ENSMUSG00000085465.1	0.437944	2.31335	3.10735	0.744479	0.456587	NA
Gm20083	ENSMUSG00000108778.1	0.437944	2.31335	3.10735	0.744479	0.456587	NA
Gbp2	ENSMUSG00000028270.12	534.455	2.31271	0.876961	2.63718	0.00835977	0.0297943
Gm14268	ENSMUSG00000087617.1	4.27305	2.31069	1.0052	2.29874	0.0215195	0.0644458
Krt7	ENSMUSG00000023039.17	2030.32	2.30841	0.406268	5.68198	1.33147e-08	2.01022e-07
2810029C07Rik	ENSMUSG00000096995.2	1.65192	2.30773	1.32484	1.7419	0.0815267	0.183814
Gm15718	ENSMUSG00000085663.1	5.78662	2.30587	0.774689	2.97651	0.00291551	0.0123551
Gm31600	ENSMUSG00000114800.1	0.43431	2.30269	3.10794	0.740905	0.458751	NA
AY512915	ENSMUSG00000068180.13	2.0839	2.30149	2.37334	0.969729	0.332182	0.505595
Gadd45g	ENSMUSG00000021453.2	147.49	2.30049	0.304729	7.5493	4.37617e-14	1.59399e-12
Lrp8	ENSMUSG00000028613.14	442.495	2.2988	0.186095	12.3528	4.70178e-35	1.21071e-32
Cntn2	ENSMUSG00000053024.14	2.23467	2.29788	1.70189	1.3502	0.176952	0.326827
AC122818.2	ENSMUSG00000117414.1	0.749129	2.2966	2.00572	1.14503	0.252198	0.421961
Mcemp1	ENSMUSG00000013974.3	1.6298	2.29562	2.01291	1.14045	0.2541	0.423962
Gbp6	ENSMUSG00000104713.4	456.439	2.29438	0.804441	2.85214	0.00434261	0.0172847
Gdf15	ENSMUSG00000038508.7	2.27985	2.29298	1.34782	1.70125	0.0888952	0.196246
Tmem139	ENSMUSG00000071506.3	1.13026	2.29145	1.98591	1.15385	0.248561	0.417383
Cyp26b1	ENSMUSG00000063415.12	104.777	2.2912	0.63591	3.60303	0.000314525	0.00179094
Gm35215	ENSMUSG00000114569.1	0.430819	2.28977	2.65848	0.861309	0.389068	NA
Mefv	ENSMUSG00000022534.14	70.871	2.28924	1.29131	1.7728	0.0762611	0.174381
Gm46401	ENSMUSG00000113017.1	3.83897	2.28626	1.1155	2.04954	0.040409	0.106676
1700054A03Rik	ENSMUSG00000099988.6	0.428604	2.28575	3.10889	0.73523	0.4622	NA
Gm49035	ENSMUSG00000115390.1	0.428604	2.28575	3.10889	0.73523	0.4622	NA
Prss47	ENSMUSG00000090658.7	0.428604	2.28575	3.10889	0.73523	0.4622	NA
Stra8	ENSMUSG00000029848.11	0.428604	2.28575	3.10889	0.73523	0.4622	NA
Sult6b1	ENSMUSG00000038045.14	0.428604	2.28575	3.10889	0.73523	0.4622	NA
Vmn1r32	ENSMUSG00000062905.2	0.428604	2.28575	3.10889	0.73523	0.4622	NA
1810053B23Rik	ENSMUSG00000100277.8	5.62586	2.28458	2.05714	1.11056	0.266757	0.437903
Gm12146	ENSMUSG00000085533.1	0.427568	2.28264	3.10907	0.734186	0.462835	NA
Lrrc36	ENSMUSG00000054320.16	910.949	2.28155	0.486819	4.68665	2.77709e-06	2.62422e-05
Gm48970	ENSMUSG00000115796.1	0.427743	2.28074	2.66041	0.857289	0.391285	NA
Gm13075	ENSMUSG00000086061.7	0.426532	2.27952	3.10925	0.733141	0.463472	NA
Gp5	ENSMUSG00000047953.7	0.426149	2.27657	2.66156	0.855352	0.392357	NA
Cdh1	ENSMUSG00000000303.12	1545.39	2.2736	0.394366	5.76519	8.1568e-09	1.2751e-07
Nphs2	ENSMUSG00000026602.9	1.11726	2.27337	1.63364	1.3916	0.164044	0.309379
Cma1	ENSMUSG00000022225.7	0.424459	2.27326	3.1096	0.731046	0.464751	NA
Epp13	ENSMUSG00000053367.15	0.424459	2.27326	3.1096	0.731046	0.464751	NA
Fbxo15	ENSMUSG00000034391.11	0.424459	2.27326	3.1096	0.731046	0.464751	NA
Tmeff1	ENSMUSG00000028347.14	741.866	2.27114	0.148751	15.268	1.24927e-52	9.65058e-50
4930430E12Rik	ENSMUSG00000085295.7	24.6559	2.27108	0.73063	3.10839	0.00188112	0.00849598
Gm45237	ENSMUSG00000110017.1	0.424076	2.27061	2.66293	0.852672	0.393841	NA
1700057H21Rik	ENSMUSG00000086007.1	0.423693	2.27033	3.10977	0.730064	0.465351	NA
Gm10532	ENSMUSG00000097712.1	0.423693	2.27033	3.10977	0.730064	0.465351	NA
Gm15046	ENSMUSG00000086441.1	0.423693	2.27033	3.10977	0.730064	0.465351	NA
Nlrp4e	ENSMUSG00000045693.8	5.23509	2.26649	1.00555	2.25398	0.0241975	0.0709397
Fxyd4	ENSMUSG00000004988.9	218.598	2.26591	0.808634	2.80215	0.00507633	0.0196976
Gm45716	ENSMUSG00000110344.1	67.6005	2.26283	0.244326	9.26153	2.01525e-20	1.48265e-18
A630095N17Rik	ENSMUSG00000096094.2	0.422036	2.26243	2.14026	1.05708	0.290473	NA
Gm17705	ENSMUSG00000090936.2	1.11208	2.25785	1.47503	1.53071	0.125841	0.255486
Gm6493	ENSMUSG00000090021.2	0.419406	2.25727	2.66612	0.846649	0.397191	NA
Gm28876	ENSMUSG00000101356.1	0.7271	2.2561	1.95829	1.15208	0.249288	0.418337
Rspo2	ENSMUSG00000051920.7	10.4203	2.25583	0.570768	3.95227	7.74147e-05	0.000512413
Dsg2	ENSMUSG00000044393.15	454.02	2.2535	0.407113	5.53532	3.10668e-08	4.31445e-07
Ppm1j	ENSMUSG00000002228.7	14.6568	2.25315	0.430556	5.2331	1.66687e-07	2.03717e-06
1700028M03Rik	ENSMUSG00000101334.1	0.417987	2.25274	2.66699	0.844673	0.398293	NA
Commd5	ENSMUSG00000055041.8	1.14576	2.25205	1.62048	1.38974	0.164607	0.310032
Gm34829	ENSMUSG00000111610.1	7.42048	2.25196	0.735385	3.06229	0.00219651	0.009695
Tex45	ENSMUSG00000040340.13	1.53663	2.2502	1.91046	1.17783	0.238865	0.405954
Megf10	ENSMUSG00000024593.15	15.67	2.24929	0.633332	3.55152	0.000383017	0.00212291
Urah	ENSMUSG00000025481.12	81.1959	2.24877	0.414364	5.42703	5.72989e-08	7.60431e-07
Mex3a	ENSMUSG00000074480.4	8.69675	2.24738	0.50754	4.42799	9.51175e-06	7.86214e-05
Ppp1r3c	ENSMUSG00000067279.2	3.32766	2.24706	0.830838	2.70456	0.00683939	0.0252896
Gm32036	ENSMUSG00000113313.1	0.705424	2.24629	2.07092	1.08468	0.278064	0.450032
Bcas1	ENSMUSG00000013523.13	24.2606	2.24233	0.69821	3.21154	0.00132024	0.00625859
Gm16004	ENSMUSG00000089655.1	0.414258	2.24179	3.11142	0.720504	0.471215	NA
6430562O15Rik	ENSMUSG00000097828.2	26.2659	2.24007	0.313723	7.14027	9.31492e-13	2.75436e-11
Fcgbp	ENSMUSG00000047730.17	74.5806	2.23957	0.405779	5.51918	3.40594e-08	4.6775e-07
Mpzl2	ENSMUSG00000032092.5	39.1666	2.2388	0.389238	5.75175	8.83221e-09	1.368e-07
Cdk3-ps	ENSMUSG00000092300.7	2.32224	2.23839	1.26342	1.77169	0.0764456	0.174695
Gm40614	ENSMUSG00000085451.2	7.70831	2.23791	0.688161	3.25201	0.00114592	0.00555143
Tuba8	ENSMUSG00000030137.8	4.87293	2.23789	0.836165	2.67637	0.00744246	0.0270821
Speer4cos	ENSMUSG00000089871.1	55.5527	2.23524	0.427429	5.2295	1.69972e-07	2.07049e-06
Vmn1r35	ENSMUSG00000060699.2	5.60763	2.23519	1.06197	2.10476	0.0353125	0.0958557
4930511M18Rik	ENSMUSG00000104791.1	0.705362	2.23373	1.68893	1.32257	0.185978	0.338374
Gm19801	ENSMUSG00000112491.1	0.411245	2.2332	2.67177	0.83585	0.403239	NA
Gm2245	ENSMUSG00000089647.2	0.411245	2.2332	2.67177	0.83585	0.403239	NA
Gm35167	ENSMUSG00000115680.1	0.411245	2.2332	2.67177	0.83585	0.403239	NA
Fbxo39	ENSMUSG00000070388.3	0.410799	2.23122	2.67192	0.835064	0.403682	NA
Gm11213	ENSMUSG00000084782.2	0.410799	2.23122	2.67192	0.835064	0.403682	NA
Anxa11os	ENSMUSG00000098609.1	0.696217	2.23095	1.6915	1.31892	0.187195	0.339685
Ccdc103	ENSMUSG00000020930.9	0.410209	2.22929	3.11215	0.716319	0.473794	NA
Glt6d1	ENSMUSG00000036401.5	0.410209	2.22929	3.11215	0.716319	0.473794	NA
AL805899.1	ENSMUSG00000117123.1	594.134	2.22781	0.379486	5.87059	4.34247e-09	7.03753e-08
A930038B10Rik	ENSMUSG00000097310.2	0.695564	2.22707	2.01067	1.10763	0.268023	0.439117
Bach2os	ENSMUSG00000086150.1	56.6643	2.227	0.828541	2.68786	0.00719109	0.026338
AC112949.1	ENSMUSG00000117292.1	0.409205	2.22694	2.67317	0.833073	0.404804	NA
4930579C12Rik	ENSMUSG00000074146.9	1.63671	2.22568	2.12804	1.04588	0.295617	0.46776
Gm45469	ENSMUSG00000109698.1	0.709327	2.22517	1.72595	1.28924	0.197314	0.353176
Gck	ENSMUSG00000041798.15	46.768	2.22508	0.449477	4.95037	7.40724e-07	7.86542e-06
Lipt2	ENSMUSG00000030725.4	0.695596	2.22445	2.49656	0.891007	0.372925	0.546262
Trpm2	ENSMUSG00000009292.18	210.822	2.22241	0.792144	2.80556	0.00502292	0.0195149
Gm45425	ENSMUSG00000109731.1	3.75724	2.22141	0.930835	2.38647	0.017011	0.0534073
Gm47512	ENSMUSG00000097274.2	0.407133	2.22083	2.67468	0.830316	0.40636	NA
Gm11274	ENSMUSG00000085331.1	0.40675	2.21927	2.67485	0.829681	0.406719	NA
Hc	ENSMUSG00000026874.10	32.6516	2.21722	0.745246	2.97515	0.00292841	0.0123956
Ankrd7	ENSMUSG00000029517.13	0.406129	2.21623	3.11292	0.711947	0.476498	NA
Foxf1	ENSMUSG00000042812.5	0.406129	2.21623	3.11292	0.711947	0.476498	NA
Krt39	ENSMUSG00000064165.8	0.406129	2.21623	3.11292	0.711947	0.476498	NA
Ephx4	ENSMUSG00000033805.12	184.351	2.21436	0.392338	5.64401	1.66133e-08	2.45623e-07
Gm10030	ENSMUSG00000057802.8	1.08753	2.21105	1.52008	1.45456	0.145791	0.284193
Gm16062	ENSMUSG00000087249.1	3.21316	2.21068	0.83111	2.65991	0.00781619	0.028215
Gm45521	ENSMUSG00000109649.1	0.403674	2.20989	2.67706	0.825493	0.409092	NA
AC167363.1	ENSMUSG00000117007.1	0.404056	2.20976	3.1133	0.709781	0.47784	NA
C330024D21Rik	ENSMUSG00000107385.3	0.404056	2.20976	3.1133	0.709781	0.47784	NA
Gm48276	ENSMUSG00000112291.1	0.404056	2.20976	3.1133	0.709781	0.47784	NA
Gm37359	ENSMUSG00000103620.1	3.15246	2.20968	0.942416	2.3447	0.0190426	0.0585295
Serpina3i	ENSMUSG00000079014.4	5.14838	2.20947	1.23459	1.78964	0.0735116	0.169705
4731419I09Rik	ENSMUSG00000097004.1	6.27469	2.20748	0.825862	2.67294	0.00751894	0.0272961
4930440I19Rik	ENSMUSG00000085431.7	10.0226	2.20644	0.910757	2.42264	0.0154081	0.0493804
Fam135b	ENSMUSG00000036800.8	261.396	2.20525	0.512363	4.30409	1.67675e-05	0.000130399
Gm42788	ENSMUSG00000107388.1	8.32535	2.20299	0.555199	3.96793	7.24982e-05	0.000484716
Ankrd37	ENSMUSG00000050914.16	50.6328	2.20099	0.392098	5.61335	1.98445e-08	2.89243e-07
Gm48279	ENSMUSG00000112060.1	0.698089	2.19982	2.06066	1.06753	0.285732	0.457589
Tcrg-C2	ENSMUSG00000076752.2	0.400007	2.19938	2.67993	0.820687	0.411825	NA
Chst5	ENSMUSG00000031952.5	0.400598	2.19838	3.11398	0.70597	0.480207	NA
Gm19510	ENSMUSG00000115426.1	0.400598	2.19838	3.11398	0.70597	0.480207	NA
Gm44206	ENSMUSG00000107429.2	0.400598	2.19838	3.11398	0.70597	0.480207	NA
Hoxb8	ENSMUSG00000056648.5	7.19497	2.19129	0.945581	2.3174	0.0204817	0.0619768
Tmem200a	ENSMUSG00000049420.9	2754.16	2.19063	0.252637	8.67105	4.28143e-18	2.38378e-16
Dthd1	ENSMUSG00000090326.1	0.396931	2.1899	2.68222	0.81645	0.414243	NA
Lad1	ENSMUSG00000041782.14	90.4874	2.1857	0.523338	4.17646	2.96082e-05	0.000217832
Gm29284	ENSMUSG00000099693.1	0.395958	2.18425	3.11483	0.701241	0.483152	NA
Gm48957	ENSMUSG00000115729.1	0.395958	2.18425	3.11483	0.701241	0.483152	NA
Fank1	ENSMUSG00000053111.13	91.3421	2.18153	0.39221	5.56213	2.66496e-08	3.7774e-07
Gm16191	ENSMUSG00000087693.1	0.394891	2.18047	3.11506	0.699975	0.483943	NA
Nts	ENSMUSG00000019890.4	6.52623	2.1795	0.671163	3.24736	0.00116483	0.00562833
Col12a1	ENSMUSG00000032332.17	8078.66	2.17874	0.232638	9.36534	7.58044e-21	5.88039e-19
Sectm1a	ENSMUSG00000025165.12	78.8343	2.17806	0.697399	3.12311	0.00178948	0.0081476
Cxcl5	ENSMUSG00000029371.7	0.393855	2.17717	3.11526	0.698872	0.484632	NA
Rap1gapos	ENSMUSG00000087476.1	0.393855	2.17717	3.11526	0.698872	0.484632	NA
Gm5581	ENSMUSG00000061969.8	1.04765	2.17552	2.41893	0.899375	0.368453	0.542152
Pmepa1	ENSMUSG00000038400.15	5139.85	2.17541	0.12454	17.4676	2.52862e-68	3.90672e-65
Dkkl1	ENSMUSG00000030792.8	0.392882	2.17427	3.11544	0.697902	0.485239	NA
Gm27162	ENSMUSG00000099025.1	0.392882	2.17427	3.11544	0.697902	0.485239	NA
Gm44196	ENSMUSG00000107614.1	0.392882	2.17427	3.11544	0.697902	0.485239	NA
E430018J23Rik	ENSMUSG00000078580.3	2.15313	2.17409	1.30318	1.6683	0.0952567	0.207479
Gm36172	ENSMUSG00000112758.1	0.67077	2.17306	2.50109	0.868843	0.384933	0.557682
Cdcp1	ENSMUSG00000035498.10	976.928	2.17279	0.366289	5.9319	2.99443e-09	4.95684e-08
0610040J01Rik	ENSMUSG00000060512.7	1718.49	2.17046	0.207618	10.4541	1.40357e-25	1.66809e-23
Apol6	ENSMUSG00000033576.12	35.0507	2.16777	0.91471	2.3699	0.0177929	0.055284
2010300C02Rik	ENSMUSG00000026090.16	901.437	2.16679	0.440611	4.91768	8.75737e-07	9.13684e-06
2010005H15Rik	ENSMUSG00000095620.7	3.03529	2.16567	1.35539	1.59782	0.110083	0.231583
Btnl6	ENSMUSG00000092618.2	0.389806	2.16424	3.11605	0.694544	0.487341	NA
Llcfc1	ENSMUSG00000029867.5	0.389806	2.16424	3.11605	0.694544	0.487341	NA
Wwc1	ENSMUSG00000018849.6	2760.45	2.16307	0.597278	3.62155	0.000292839	0.00168192
Wdr72	ENSMUSG00000044976.17	1461.13	2.16196	0.288667	7.48944	6.91686e-14	2.44264e-12
Ifi47	ENSMUSG00000078920.3	431.854	2.16191	0.550045	3.93043	8.47939e-05	0.000555701
AC124561.1	ENSMUSG00000115122.1	1.59241	2.16182	1.54826	1.39629	0.162628	0.307382
Hrasls5	ENSMUSG00000024973.16	3.0841	2.16093	1.30733	1.65294	0.098344	0.212332
A230001M10Rik	ENSMUSG00000105891.4	7.66616	2.15915	0.594796	3.63007	0.00028334	0.00163424
Tnfaip3	ENSMUSG00000019850.11	385.665	2.15892	0.538288	4.01072	6.05338e-05	0.000412457
Cfap44	ENSMUSG00000071550.14	1.06622	2.15852	1.95036	1.10673	0.268412	0.439452
Mannr	ENSMUSG00000102590.1	325.236	2.15798	0.249085	8.66364	4.56953e-18	2.5365e-16
Slc16a3	ENSMUSG00000025161.16	215.338	2.15506	0.506211	4.25724	2.06967e-05	0.000157281
Tnfsf10	ENSMUSG00000039304.11	1429.14	2.15502	0.299931	7.18505	6.71833e-13	2.03194e-11
Ifng	ENSMUSG00000055170.4	1.44283	2.15493	1.99713	1.07901	0.280582	0.452308
AC091309.4	ENSMUSG00000117442.1	0.38673	2.15415	3.11667	0.691168	0.48946	NA
Gm8091	ENSMUSG00000085915.1	0.38673	2.15415	3.11667	0.691168	0.48946	NA
Olfr93	ENSMUSG00000091601.3	0.38673	2.15415	3.11667	0.691168	0.48946	NA
Pou4f1	ENSMUSG00000048349.9	0.38673	2.15415	3.11667	0.691168	0.48946	NA
Gm3294	ENSMUSG00000092090.2	2.99415	2.1521	1.10021	1.95608	0.050456	0.126945
Ccdc180	ENSMUSG00000035539.13	3.08976	2.15057	0.906021	2.37365	0.0176135	0.0548922
1500009C09Rik	ENSMUSG00000068099.4	0.383654	2.144	3.1173	0.687775	0.491595	NA
B230311B06Rik	ENSMUSG00000109284.1	0.383654	2.144	3.1173	0.687775	0.491595	NA
Ceacam11	ENSMUSG00000030368.10	0.383654	2.144	3.1173	0.687775	0.491595	NA
G630018N14Rik	ENSMUSG00000085620.2	0.383654	2.144	3.1173	0.687775	0.491595	NA
Gm35177	ENSMUSG00000110922.1	0.383654	2.144	3.1173	0.687775	0.491595	NA
Gm40932	ENSMUSG00000113553.1	0.383654	2.144	3.1173	0.687775	0.491595	NA
Gm5779	ENSMUSG00000112471.1	0.383654	2.144	3.1173	0.687775	0.491595	NA
Krt6a	ENSMUSG00000058354.7	0.383654	2.144	3.1173	0.687775	0.491595	NA
Ptx4	ENSMUSG00000044172.7	0.383654	2.144	3.1173	0.687775	0.491595	NA
Tent5d	ENSMUSG00000073007.10	0.383654	2.144	3.1173	0.687775	0.491595	NA
Arid5a	ENSMUSG00000037447.16	1905.99	2.14398	0.146989	14.586	3.44916e-48	1.99836e-45
Spns2	ENSMUSG00000040447.15	3650.28	2.14293	0.235046	9.11705	7.71963e-20	5.34037e-18
Far2os2	ENSMUSG00000086777.3	19.7819	2.14292	0.386823	5.53979	3.02836e-08	4.21515e-07
Ppp1r14c	ENSMUSG00000040653.6	188.007	2.13941	0.458339	4.66774	3.04525e-06	2.85146e-05
Nfe2l3	ENSMUSG00000029832.16	195.218	2.13924	0.480287	4.45409	8.42508e-06	7.06153e-05
Smtnl2	ENSMUSG00000045667.14	137.117	2.13754	0.464832	4.59853	4.25488e-06	3.86125e-05
Platr1	ENSMUSG00000101061.1	1.03483	2.13643	1.99348	1.07171	0.283849	0.455712
Sh2d6	ENSMUSG00000052631.15	45.0289	2.13263	0.524238	4.06806	4.74068e-05	0.000329678
Tmie	ENSMUSG00000049555.10	20.4309	2.1313	0.472928	4.50661	6.58723e-06	5.68298e-05
Mecomos	ENSMUSG00000085702.8	6.21013	2.12917	0.615296	3.46039	0.000539388	0.00286622
Trpm6	ENSMUSG00000024727.8	1699.82	2.12377	0.36548	5.8109	6.21393e-09	9.92301e-08
Gm45004	ENSMUSG00000108725.1	4.00959	2.1228	0.964406	2.20115	0.0277252	0.0792149
Tdrd5	ENSMUSG00000060985.15	8.20512	2.12202	1.09242	1.9425	0.0520766	0.130036
Klra2	ENSMUSG00000030187.15	416.597	2.122	0.906156	2.34176	0.0191932	0.058846
Pard3bos3	ENSMUSG00000085400.1	67.1191	2.121	0.306341	6.92367	4.4009e-12	1.17909e-10
Mmp12	ENSMUSG00000049723.14	25.3684	2.1197	0.614433	3.44984	0.000560915	0.00296616
Car2	ENSMUSG00000027562.12	172.441	2.11729	0.251128	8.43115	3.42281e-17	1.74818e-15
H2-Q10	ENSMUSG00000067235.14	1.43762	2.1148	2.06102	1.02609	0.304847	0.477354
Gm11788	ENSMUSG00000086929.1	1.01944	2.11371	1.75748	1.2027	0.229094	0.393802
Hrasls	ENSMUSG00000022525.13	8.04278	2.11305	0.688049	3.07107	0.00213292	0.00945359
6430571L13Rik	ENSMUSG00000037977.6	11.3294	2.10955	0.576699	3.65797	0.000254216	0.00148868
Dlx6	ENSMUSG00000029754.13	19.7065	2.10781	0.619957	3.39993	0.000674022	0.00348379
Gm12602	ENSMUSG00000085569.1	2.47182	2.10758	1.12053	1.88088	0.0599879	0.145136
Pkd2l1	ENSMUSG00000037578.4	1.02949	2.10565	1.94436	1.08295	0.27883	0.450659
Gbp8	ENSMUSG00000034438.16	3706.27	2.10564	0.818474	2.57264	0.0100925	0.0348316
Gm48837	ENSMUSG00000114536.1	3.62049	2.10509	0.853205	2.46727	0.0136146	0.0445255
E230016K23Rik	ENSMUSG00000051832.7	31.6346	2.10501	0.321293	6.55168	5.68939e-11	1.24978e-09
Sncaip	ENSMUSG00000024534.15	16572.6	2.10451	0.228129	9.2251	2.83298e-20	2.05974e-18
Epb41l4b	ENSMUSG00000028434.12	1550.45	2.10306	0.394231	5.3346	9.57545e-08	1.23028e-06
Muc13	ENSMUSG00000022824.12	12.0501	2.10063	0.798335	2.63127	0.00850662	0.0302132
AC168050.1	ENSMUSG00000117508.1	1.47654	2.09805	1.78157	1.17764	0.23894	0.406008
Gjb4	ENSMUSG00000046623.8	1.00789	2.09725	2.43849	0.86006	0.389756	0.562954
Spatc1	ENSMUSG00000049653.5	1.00789	2.09725	2.43849	0.86006	0.389756	0.562954
Nxf7	ENSMUSG00000031410.14	1.05372	2.09723	2.4191	0.866946	0.385972	0.558704
Mtus2	ENSMUSG00000029651.16	277.083	2.0968	0.222572	9.42074	4.47901e-21	3.61048e-19
Chrdl2	ENSMUSG00000030732.13	245.775	2.09621	0.350228	5.98528	2.16017e-09	3.6844e-08
Gm7932	ENSMUSG00000108084.1	1.0046	2.09224	1.93138	1.08329	0.27868	0.450511
Ano4	ENSMUSG00000035189.16	5082.65	2.09161	0.310099	6.74496	1.53072e-11	3.68566e-10
Cryba4	ENSMUSG00000066975.12	1.44989	2.08995	2.01317	1.03814	0.299205	0.471506
Gm45510	ENSMUSG00000109647.1	1.00029	2.0874	1.67558	1.24578	0.212846	0.373337
D430036J16Rik	ENSMUSG00000097466.8	7.26433	2.08452	1.00622	2.07164	0.0382991	0.102256
Pla2g7	ENSMUSG00000023913.17	910.12	2.08354	0.756835	2.75297	0.00590577	0.0222773
Ap3b2	ENSMUSG00000062444.14	2.96104	2.08067	0.936992	2.22059	0.0263788	0.0762018
Olfr56	ENSMUSG00000040328.15	3478.59	2.08	0.643197	3.23384	0.00122137	0.00585043
Cd3e	ENSMUSG00000032093.7	12.9235	2.07778	1.19938	1.73237	0.0832075	0.186809
Nol4	ENSMUSG00000041923.15	41.572	2.07521	0.375757	5.52275	3.33734e-08	4.60031e-07
Gm15873	ENSMUSG00000085725.2	0.991183	2.07478	1.67338	1.23987	0.215022	0.376121
Gm48845	ENSMUSG00000112284.1	1.9481	2.06971	1.17467	1.76196	0.0780761	0.177676
Gm35572	ENSMUSG00000110462.1	6.99106	2.0687	0.74443	2.77891	0.00545424	0.0208713
Cpe	ENSMUSG00000037852.8	681.474	2.06842	0.159002	13.0088	1.09052e-38	3.61041e-36
Wfdc2	ENSMUSG00000017723.11	1493.25	2.06785	0.418162	4.94509	7.61095e-07	8.05909e-06
Ly6c2	ENSMUSG00000022584.14	6.69268	2.06441	1.77678	1.16188	0.245284	0.413491
Gpr176	ENSMUSG00000040133.2	163.728	2.05744	0.313428	6.56431	5.22744e-11	1.15334e-09
Mansc4	ENSMUSG00000072662.2	2.28484	2.05632	1.61218	1.27549	0.202134	0.35955
Sypl2	ENSMUSG00000027887.11	8.80684	2.05034	0.780837	2.62582	0.00864395	0.0306125
Gm38139	ENSMUSG00000103204.1	13.2937	2.04052	0.651637	3.13137	0.00173993	0.00796306
Cstl1	ENSMUSG00000055177.15	4.44756	2.03941	1.28061	1.59253	0.111266	0.233452
Ccdc63	ENSMUSG00000043036.13	1.42228	2.03935	1.66219	1.22691	0.219857	0.382307
Gm43691	ENSMUSG00000104776.1	0.626828	2.03633	2.0909	0.973897	0.330108	NA
P2ry2	ENSMUSG00000032860.5	117.242	2.03581	0.341273	5.96533	2.44139e-09	4.11112e-08
Hoxb7	ENSMUSG00000038721.8	7.29222	2.03489	0.728835	2.79198	0.00523869	0.0202134
Rgs16	ENSMUSG00000026475.7	16.4173	2.03475	0.50054	4.06512	4.80075e-05	0.000332981
Il23r	ENSMUSG00000049093.9	43.6769	2.0331	0.290764	6.99227	2.70483e-12	7.42925e-11
Crb1	ENSMUSG00000063681.14	0.629884	2.03143	3.0925	0.656891	0.511251	NA
Lamb3	ENSMUSG00000026639.18	481.486	2.03059	0.243025	8.35546	6.51801e-17	3.2129e-15
Gm14591	ENSMUSG00000083428.1	2.29784	2.03011	1.06325	1.90935	0.0562176	0.138214
2010001K21Rik	ENSMUSG00000051606.5	81.0065	2.02849	0.267375	7.5867	3.28155e-14	1.21195e-12
Gbp9	ENSMUSG00000029298.15	2430.48	2.02817	0.817986	2.47947	0.0131576	0.0432751
Reep6	ENSMUSG00000035504.16	14.9086	2.02619	0.636008	3.1858	0.00144356	0.00676018
Gstp3	ENSMUSG00000058216.12	1.33881	2.02334	1.97634	1.02378	0.305939	0.478404
2810408A11Rik	ENSMUSG00000018570.17	19.2092	2.02155	0.607153	3.32956	0.000869847	0.00436572
Ikzf3	ENSMUSG00000018168.8	270.011	2.02117	0.283063	7.14035	9.30915e-13	2.75436e-11
Lrriq1	ENSMUSG00000019892.13	70.0846	2.01987	0.391395	5.1607	2.46032e-07	2.89065e-06
Lrrc6	ENSMUSG00000022375.6	4.844	2.01934	0.713382	2.83065	0.00464532	0.0182621
Serpina1e	ENSMUSG00000072849.10	112.481	2.01776	0.371473	5.43178	5.57937e-08	7.41516e-07
Irgm2	ENSMUSG00000069874.7	1016.3	2.01681	0.762261	2.64583	0.00814905	0.0292231
Gm17177	ENSMUSG00000091834.2	3.79091	2.01609	0.812079	2.48262	0.0130418	0.0429554
Pkhd1	ENSMUSG00000043760.16	2648.62	2.01532	0.453007	4.44876	8.63692e-06	7.2195e-05
Draxin	ENSMUSG00000029005.4	0.959802	2.01349	2.03567	0.9891	0.322614	0.496
Fam167a	ENSMUSG00000035095.11	8.571	2.01254	0.617434	3.25952	0.00111601	0.00542495
Ccdc192	ENSMUSG00000058925.11	79.2809	2.01146	0.247439	8.12913	4.32399e-16	1.92709e-14
Fam83b	ENSMUSG00000032358.12	76.0039	2.01138	0.282389	7.12271	1.05826e-12	3.10444e-11
Gucy2g	ENSMUSG00000055523.6	2.79854	2.01073	1.03901	1.93524	0.0529602	0.131849
Igtp	ENSMUSG00000078853.8	512.535	2.00871	0.796654	2.52143	0.0116878	0.0392772
Gm16271	ENSMUSG00000089656.1	2.55227	2.00774	1.38796	1.44654	0.148026	0.287311
Dlx6os2	ENSMUSG00000094868.1	10.0684	2.00683	0.630663	3.18209	0.00146215	0.00683519
Ampd1	ENSMUSG00000070385.12	5.68704	2.00559	1.11686	1.79574	0.0725361	0.167893
Dmrta1	ENSMUSG00000043753.2	8.89928	2.0052	0.835365	2.40039	0.0163777	0.0518249
Hmgb4os	ENSMUSG00000085717.1	0.629321	2.00383	1.75112	1.14432	0.252492	NA
Fndc3c1	ENSMUSG00000033737.14	2.79771	2.00153	1.64135	1.21944	0.222676	0.385761
Tgfbi	ENSMUSG00000035493.10	1251.55	2.00142	0.24064	8.31706	9.01722e-17	4.37642e-15
4930552P12Rik	ENSMUSG00000097632.1	0.609086	1.99803	2.55346	0.78248	0.433933	NA
Themis3	ENSMUSG00000024105.3	17.1461	1.9967	0.554988	3.59773	0.000321011	0.00182171
Wnt16	ENSMUSG00000029671.15	25.6994	1.99399	0.699502	2.85059	0.00436389	0.0173396
Samd11	ENSMUSG00000096351.2	2.17076	1.99292	2.40044	0.830229	0.406409	0.578255
Tgtp2	ENSMUSG00000078921.3	258.625	1.9911	0.845312	2.35546	0.0184996	0.0571162
Ccdc81	ENSMUSG00000039391.11	30.8029	1.98847	0.373783	5.31986	1.03847e-07	1.32324e-06
Il27	ENSMUSG00000044701.5	12.7448	1.98725	0.947928	2.09641	0.0360455	0.0973747
Gm42722	ENSMUSG00000106093.1	77.1616	1.98518	0.474011	4.18804	2.81371e-05	0.000207848
Gm34045	ENSMUSG00000112161.1	7.10583	1.98199	0.626588	3.16314	0.00156075	0.0072359
Tpbg	ENSMUSG00000035274.13	2.37433	1.97804	1.02181	1.93583	0.0528889	0.131707
Slco1b2	ENSMUSG00000030236.10	2.4697	1.97671	1.30601	1.51355	0.13014	0.261576
9630013K17Rik	ENSMUSG00000086359.1	2.74539	1.97481	0.915977	2.15597	0.0310863	0.0867076
Elf5	ENSMUSG00000027186.14	12.8585	1.97435	1.36341	1.44809	NA	NA
Gm47547	ENSMUSG00000114196.1	106.215	1.97225	0.198159	9.95289	2.44974e-23	2.45504e-21
Dlx6os1	ENSMUSG00000090063.6	141.603	1.96907	0.517393	3.80575	0.000141372	0.000880727
Cavin4	ENSMUSG00000028348.7	12.2234	1.96565	0.450717	4.36116	1.29376e-05	0.000103562
Cxcr6	ENSMUSG00000048521.8	7.31602	1.96394	1.08496	1.81015	0.0702721	0.16377
Gm15472	ENSMUSG00000084760.1	4.55175	1.96288	0.810833	2.42082	0.0154856	0.049569
Trim13	ENSMUSG00000035235.13	30.9561	1.9618	0.362324	5.4145	6.14617e-08	8.11609e-07
Myl6b	ENSMUSG00000039824.4	0.600251	1.96173	2.04067	0.961318	0.336392	NA
Gm13748	ENSMUSG00000086836.1	0.590485	1.96099	1.75568	1.11694	0.264019	NA
Gm44028	ENSMUSG00000108062.1	0.590144	1.96099	1.75584	1.11684	0.264063	NA
Cadm4	ENSMUSG00000054793.8	15.0556	1.9597	0.674536	2.90526	0.00366944	0.0150147
Ryr2	ENSMUSG00000021313.16	2765.4	1.95764	0.340072	5.75656	8.58436e-09	1.33407e-07
AC151292.1	ENSMUSG00000117185.1	0.942001	1.95547	2.08174	0.93934	0.347556	0.521714
Igfbp2	ENSMUSG00000039323.18	4012.39	1.95446	0.405108	4.82454	1.4033e-06	1.39652e-05
Serpinb5	ENSMUSG00000067006.12	178.845	1.95402	0.361542	5.40467	6.49275e-08	8.54334e-07
Gm40787	ENSMUSG00000112539.1	0.97907	1.95295	2.00786	0.972655	0.330725	0.50408
Gm44867	ENSMUSG00000108650.1	8.20952	1.95272	0.627057	3.1141	0.00184505	0.00836045
Tnfaip6	ENSMUSG00000053475.5	58.5181	1.95165	0.283081	6.89431	5.41272e-12	1.42545e-10
Kcnd3	ENSMUSG00000040896.16	9159.41	1.95157	0.17152	11.3781	5.37716e-30	8.74495e-28
Tubal3	ENSMUSG00000021216.7	1.4455	1.94927	1.63085	1.19525	0.231989	0.397512
Krt18	ENSMUSG00000023043.7	25.8049	1.94916	0.432486	4.50688	6.57885e-06	5.67839e-05
Olfr1444	ENSMUSG00000046272.4	0.611361	1.94823	2.53679	0.76799	0.442493	NA
Tnnc1	ENSMUSG00000091898.8	1.80548	1.94667	1.19036	1.63536	0.101974	0.218566
Lsamp	ENSMUSG00000061080.11	10919.1	1.94396	0.348886	5.5719	2.51976e-08	3.5853e-07
Gm31816	ENSMUSG00000109844.2	10.7433	1.94374	1.16902	1.6627	0.0963715	0.209219
Gm43660	ENSMUSG00000107352.1	0.94521	1.94262	1.75306	1.10813	0.267808	0.438967
Zbtb8b	ENSMUSG00000048485.12	289.027	1.94189	0.390184	4.97686	6.46242e-07	6.95376e-06
4930558K02Rik	ENSMUSG00000086277.2	0.92837	1.94176	1.74181	1.11479	0.264939	0.436077
Gm31462	ENSMUSG00000115976.1	0.59005	1.93911	2.04021	0.950449	0.341884	NA
Gm48802	ENSMUSG00000114745.1	25.4135	1.93878	0.31168	6.22042	4.95818e-10	9.3705e-09
2310031A07Rik	ENSMUSG00000097457.1	3.31512	1.93833	1.59199	1.21755	0.223396	0.38654
Tnfrsf8	ENSMUSG00000028602.12	82.0895	1.93567	0.483388	4.00438	6.218e-05	0.000422287
Tnfsf4	ENSMUSG00000026700.4	1.38646	1.93472	1.62607	1.18982	0.234117	0.400168
4930511M06Rik	ENSMUSG00000086607.7	925.925	1.93432	0.216855	8.91987	4.66842e-19	2.98457e-17
1700007K13Rik	ENSMUSG00000026831.16	0.338572	1.93392	3.13134	0.617602	0.536837	NA
2610028E06Rik	ENSMUSG00000085562.7	0.338572	1.93392	3.13134	0.617602	0.536837	NA
5330413P13Rik	ENSMUSG00000086822.2	0.338572	1.93392	3.13134	0.617602	0.536837	NA
Cacng5	ENSMUSG00000040373.12	0.338572	1.93392	3.13134	0.617602	0.536837	NA
Gm19792	ENSMUSG00000113495.1	0.338572	1.93392	3.13134	0.617602	0.536837	NA
Gm32004	ENSMUSG00000114534.1	0.338572	1.93392	3.13134	0.617602	0.536837	NA
Gm49165	ENSMUSG00000115088.1	0.338572	1.93392	3.13134	0.617602	0.536837	NA
Nme9	ENSMUSG00000046242.8	0.338572	1.93392	3.13134	0.617602	0.536837	NA
Prss23os	ENSMUSG00000030623.4	0.338572	1.93392	3.13134	0.617602	0.536837	NA
AC154218.2	ENSMUSG00000117315.1	1.78929	1.93021	1.17745	1.63932	0.101147	0.217207
Enc1	ENSMUSG00000041773.8	28.7626	1.92518	0.347557	5.53917	3.03905e-08	4.22681e-07
Nupr1	ENSMUSG00000030717.9	643	1.9249	0.203886	9.44105	3.69063e-21	3.01429e-19
Prrg4	ENSMUSG00000027171.10	62.8786	1.92451	0.37865	5.08256	3.72383e-07	4.21489e-06
Tpbpb	ENSMUSG00000062705.7	3.3414	1.92215	1.10163	1.74483	0.0810152	0.18295
Rnf122	ENSMUSG00000039328.11	338.133	1.91903	0.176671	10.8622	1.74496e-27	2.45988e-25
9530053A07Rik	ENSMUSG00000078776.9	2.6593	1.91738	1.24791	1.53647	0.124423	0.253216
Olfr691	ENSMUSG00000043948.2	0.583898	1.91714	2.6112	0.734199	0.462827	NA
Gm30301	ENSMUSG00000106538.1	3.84212	1.91568	1.13154	1.69298	0.0904593	0.19897
Fgd3	ENSMUSG00000037946.11	1327.62	1.91551	0.203676	9.40469	5.21856e-21	4.11711e-19
Oit1	ENSMUSG00000021749.6	490.103	1.91459	0.419814	4.56056	5.10177e-06	4.53654e-05
Lpar2	ENSMUSG00000031861.15	3.36432	1.91359	1.26221	1.51606	0.129505	0.260528
Gm31683	ENSMUSG00000114662.1	14.6728	1.91357	0.423463	4.51886	6.21738e-06	5.39655e-05
4930408O17Rik	ENSMUSG00000021101.2	0.332865	1.91265	3.13288	0.61051	0.541524	NA
AC122381.1	ENSMUSG00000116651.1	0.332865	1.91265	3.13288	0.61051	0.541524	NA
Gm30790	ENSMUSG00000109333.1	0.332865	1.91265	3.13288	0.61051	0.541524	NA
Gm38251	ENSMUSG00000102784.1	0.332865	1.91265	3.13288	0.61051	0.541524	NA
Gm38509	ENSMUSG00000106519.1	0.332865	1.91265	3.13288	0.61051	0.541524	NA
Olfr1358	ENSMUSG00000107822.4	0.332865	1.91265	3.13288	0.61051	0.541524	NA
Ramp3	ENSMUSG00000041046.7	129.157	1.91248	0.298104	6.41548	1.4038e-10	2.88222e-09
Slc22a29	ENSMUSG00000075044.12	5.13288	1.91222	1.61011	1.18763	0.234979	0.401406
Gm6787	ENSMUSG00000086404.1	0.939158	1.91198	1.72926	1.10566	0.268872	0.439856
Abt1	ENSMUSG00000036376.3	0.907451	1.9097	1.53135	1.24707	0.212371	0.372679
Gm13528	ENSMUSG00000085087.1	3.19396	1.90899	0.875356	2.18081	0.0291973	0.0825684
Gm13415	ENSMUSG00000085057.7	92.9695	1.90873	0.278089	6.86374	6.70788e-12	1.73936e-10
Eef1a2	ENSMUSG00000016349.10	0.331829	1.90873	3.13316	0.609202	0.542391	NA
Gm45303	ENSMUSG00000109605.1	0.331829	1.90873	3.13316	0.609202	0.542391	NA
Gm47223	ENSMUSG00000112636.1	0.331829	1.90873	3.13316	0.609202	0.542391	NA
Ttc21a	ENSMUSG00000032514.11	1.52893	1.90834	2.42808	0.785947	0.431899	0.601563
4833427F10Rik	ENSMUSG00000092171.1	21.6995	1.90639	0.504929	3.77556	0.000159646	0.000980727
Myo3a	ENSMUSG00000025716.14	0.935803	1.90476	1.94827	0.977668	0.328239	0.501776
Gm49083	ENSMUSG00000115354.1	0.943361	1.90467	1.72577	1.10367	0.269738	0.440651
Zbtb22	ENSMUSG00000051390.10	0.904021	1.90457	1.65688	1.1495	0.250351	0.41959
Gfi1	ENSMUSG00000029275.18	5.65054	1.90318	1.21901	1.56124	0.118466	0.244529
Tph1	ENSMUSG00000040046.14	7.6614	1.90225	0.782406	2.43128	0.0150456	0.0484532
Gm47956	ENSMUSG00000112000.1	1.73981	1.90068	1.20071	1.58296	0.113431	0.236799
Sdf2l1	ENSMUSG00000022769.9	0.908361	1.90048	1.73418	1.0959	0.273125	0.444304
Irgm1	ENSMUSG00000046879.7	1630.16	1.89884	0.618419	3.07047	0.0021372	0.009468
Cks1b	ENSMUSG00000028044.6	3.20906	1.89802	0.895966	2.11841	0.0341403	0.093426
AI661453	ENSMUSG00000034382.14	276.558	1.89693	0.382058	4.96504	6.86861e-07	7.34395e-06
Btn2a2	ENSMUSG00000053216.15	8.50589	1.89669	1.14714	1.65341	0.0982478	0.212221
4930544I03Rik	ENSMUSG00000097071.2	85.1589	1.8961	0.248042	7.64427	2.10129e-14	7.85441e-13
Gm45883	ENSMUSG00000109967.1	542.954	1.89439	0.160904	11.7734	5.35442e-32	1.06743e-29
Slc5a1	ENSMUSG00000011034.6	70.1608	1.89351	0.539292	3.51111	0.000446237	0.00243187
Gm12846	ENSMUSG00000081046.1	1.266	1.8933	1.42398	1.32958	0.183655	0.335333
Btg2	ENSMUSG00000020423.6	39.3698	1.89208	0.276175	6.85101	7.33292e-12	1.88561e-10
Dgkk	ENSMUSG00000062393.13	0.327159	1.89114	3.13445	0.603341	0.546282	NA
Fthl17a	ENSMUSG00000035491.5	0.327159	1.89114	3.13445	0.603341	0.546282	NA
Wbp2nl	ENSMUSG00000022455.4	0.327159	1.89114	3.13445	0.603341	0.546282	NA
Gvin1	ENSMUSG00000045868.12	583.878	1.89092	0.449979	4.20224	2.64281e-05	0.000195913
Ache	ENSMUSG00000023328.14	12.5193	1.89081	0.726136	2.60393	0.00921605	0.0322936
Ccl5	ENSMUSG00000035042.2	15.8094	1.88964	1.1051	1.70992	0.0872801	0.193631
Wnt4	ENSMUSG00000036856.4	26.304	1.88785	0.303568	6.21888	5.00714e-10	9.4534e-09
Gm44174	ENSMUSG00000108289.1	21.0228	1.8878	1.02753	1.83722	0.0661778	0.156697
Slc14a2	ENSMUSG00000024552.15	10.0703	1.88727	1.00927	1.86995	0.0614912	0.147903
Gm18342	ENSMUSG00000101279.1	19.5214	1.88665	0.73734	2.55872	0.0105057	0.0359911
Bicdl2	ENSMUSG00000043782.9	7.40121	1.88357	0.810174	2.32489	0.0200779	0.0609937
Trdv4	ENSMUSG00000076867.2	0.325087	1.8832	3.13504	0.600696	0.548042	NA
4930471M09Rik	ENSMUSG00000097693.3	0.324704	1.88124	3.13518	0.600042	0.548478	NA
Hkdc1	ENSMUSG00000020080.8	0.324704	1.88124	3.13518	0.600042	0.548478	NA
Hspa1l	ENSMUSG00000007033.4	1.30773	1.88035	1.31112	1.43416	0.151527	0.29241
B3gnt7	ENSMUSG00000079445.3	0.894463	1.87965	1.69171	1.1111	0.266527	0.43768
4933433N18Rik	ENSMUSG00000113227.1	5.3841	1.87928	0.734569	2.55835	0.0105172	0.0360155
AC132455.2	ENSMUSG00000117485.1	23.5532	1.87787	0.314706	5.96706	2.41562e-09	4.07512e-08
Gm15880	ENSMUSG00000084821.1	0.893426	1.87774	1.73109	1.08472	0.278047	0.450032
Mapk15	ENSMUSG00000063704.13	4.0536	1.87729	0.746877	2.51351	0.0119535	0.0400118
A230005M16Rik	ENSMUSG00000087612.1	1.656	1.87591	1.57116	1.19397	0.232491	0.398114
Egfros	ENSMUSG00000085091.1	1.69211	1.87473	1.11907	1.67526	0.0938835	0.20516
Slit2	ENSMUSG00000031558.15	10233.6	1.87409	0.164402	11.3994	4.20803e-30	6.96579e-28
Nectin4	ENSMUSG00000006411.12	171.218	1.87381	0.36575	5.1232	3.00397e-07	3.47001e-06
Ptgfr	ENSMUSG00000028036.6	113.173	1.87369	0.35109	5.33677	9.46191e-08	1.21738e-06
Cdh10	ENSMUSG00000022321.15	111.102	1.87294	0.411108	4.55584	5.21766e-06	4.6305e-05
Naip3	ENSMUSG00000082956.4	3.96473	1.87283	0.732187	2.55786	0.0105318	0.036059
Trim10	ENSMUSG00000073400.6	4.50152	1.87268	0.80461	2.32744	0.0199419	0.0606601
Gm43661	ENSMUSG00000104818.1	1.34179	1.87131	1.35162	1.3845	0.166207	0.312174
Zbp1	ENSMUSG00000027514.14	450.603	1.87122	0.670598	2.79037	0.00526477	0.020276
Cntnap5a	ENSMUSG00000070695.4	14.0826	1.87067	0.481531	3.88483	0.000102401	0.000656923
Zfp804a	ENSMUSG00000070866.4	225.857	1.87066	0.212399	8.80731	1.28181e-18	7.69201e-17
Nxph3	ENSMUSG00000046719.7	1.29908	1.87001	1.28075	1.46008	0.144267	0.281994
Gm12526	ENSMUSG00000073846.4	0.321453	1.86941	3.13606	0.5961	0.551108	NA
Gm17720	ENSMUSG00000091041.1	0.321453	1.86941	3.13606	0.5961	0.551108	NA
Jsrp1	ENSMUSG00000020216.13	0.321453	1.86941	3.13606	0.5961	0.551108	NA
Kcnj3	ENSMUSG00000026824.11	0.321453	1.86941	3.13606	0.5961	0.551108	NA
Mov10l1	ENSMUSG00000015365.15	0.321453	1.86941	3.13606	0.5961	0.551108	NA
Pla2g10	ENSMUSG00000022683.13	0.321453	1.86941	3.13606	0.5961	0.551108	NA
Rsph6a	ENSMUSG00000040866.13	0.321453	1.86941	3.13606	0.5961	0.551108	NA
Snap25	ENSMUSG00000027273.13	0.321453	1.86941	3.13606	0.5961	0.551108	NA
Wincr1	ENSMUSG00000085183.1	0.321453	1.86941	3.13606	0.5961	0.551108	NA
Zfp474	ENSMUSG00000046886.6	0.321453	1.86941	3.13606	0.5961	0.551108	NA
A830009L08Rik	ENSMUSG00000097182.2	0.321628	1.86909	3.13609	0.595993	0.55118	NA
C030047K22Rik	ENSMUSG00000084873.3	0.321628	1.86909	3.13609	0.595993	0.55118	NA
Ripk4	ENSMUSG00000005251.15	48.903	1.86623	0.347636	5.36834	7.94638e-08	1.03314e-06
Gm15931	ENSMUSG00000081723.1	9.2236	1.86617	0.817307	2.28331	0.0224119	0.0666534
Gm6916	ENSMUSG00000108608.1	0.320417	1.8654	3.13636	0.594765	0.552	NA
C2cd4a	ENSMUSG00000047990.6	8.6236	1.86386	0.831905	2.24047	0.0250601	0.0730297
4930447M23Rik	ENSMUSG00000087674.7	42.5449	1.8634	0.299917	6.21304	5.19679e-10	9.76174e-09
Gdf5	ENSMUSG00000038259.4	0.319381	1.86139	3.13667	0.593428	0.552895	NA
4921525O09Rik	ENSMUSG00000113211.1	0.318998	1.85831	2.83584	0.655294	0.512279	NA
Gm15199	ENSMUSG00000086428.1	0.318998	1.85831	2.83584	0.655294	0.512279	NA
Slc10a1	ENSMUSG00000021135.8	0.318998	1.85831	2.83584	0.655294	0.512279	NA
Slc45a2	ENSMUSG00000022243.10	0.318998	1.85831	2.83584	0.655294	0.512279	NA
Pkp3	ENSMUSG00000054065.12	119.886	1.85787	0.412673	4.50203	6.73072e-06	5.7933e-05
4930562F07Rik	ENSMUSG00000026729.9	0.318344	1.85736	3.13697	0.592089	0.553791	NA
Gm20471	ENSMUSG00000092188.1	0.318344	1.85736	3.13697	0.592089	0.553791	NA
Gm34358	ENSMUSG00000108285.1	0.318344	1.85736	3.13697	0.592089	0.553791	NA
Gm5624	ENSMUSG00000092165.9	0.318344	1.85736	3.13697	0.592089	0.553791	NA
Ikzf2	ENSMUSG00000025997.13	10260.6	1.85652	0.132796	13.9802	2.05859e-44	9.78621e-42
Gm49226	ENSMUSG00000114988.1	2.37645	1.85583	2.0212	0.918181	0.358524	0.532692
Lgals12	ENSMUSG00000024972.16	2.90618	1.85571	1.10562	1.67843	0.0932639	0.203929
Loxl2	ENSMUSG00000034205.16	87.6425	1.85498	0.315075	5.88743	3.92258e-09	6.39619e-08
Dusp1	ENSMUSG00000024190.6	188.604	1.85485	0.289194	6.41386	1.41876e-10	2.9065e-09
Gm34250	ENSMUSG00000115209.1	0.317962	1.85444	2.83709	0.653641	0.513343	NA
Slc7a15	ENSMUSG00000020600.13	0.317962	1.85444	2.83709	0.653641	0.513343	NA
Gm13912	ENSMUSG00000086758.1	1.41817	1.85213	1.70809	1.08433	0.278219	0.450104
4930572G02Rik	ENSMUSG00000115725.1	2.59217	1.85129	1.01555	1.82294	0.0683124	0.160365
Rasl11b	ENSMUSG00000049907.8	75.0736	1.85078	0.396485	4.66797	3.04192e-06	2.84978e-05
Parm1	ENSMUSG00000034981.9	619.147	1.84793	0.22695	8.14243	3.87419e-16	1.73078e-14
Zfp990	ENSMUSG00000078503.9	3.73472	1.84721	1.32447	1.39468	0.163112	0.308039
Gm27252	ENSMUSG00000098708.7	1.27262	1.84662	1.44696	1.2762	0.201883	0.359377
Pgp	ENSMUSG00000043445.7	0.315922	1.84643	2.8395	0.650266	0.51552	NA
Il12rb1	ENSMUSG00000000791.9	14.8883	1.84546	0.878713	2.10018	0.0357129	0.0966602
Rtl4	ENSMUSG00000071679.4	73.32	1.84431	0.394973	4.66947	3.01978e-06	2.83255e-05
Edn1	ENSMUSG00000021367.8	77.3058	1.84384	0.303872	6.06783	1.29652e-09	2.30687e-08
Gm4070	ENSMUSG00000078606.8	877.242	1.84126	0.449346	4.09765	4.17373e-05	0.000295912
Far2os1	ENSMUSG00000089948.1	8.70129	1.83991	0.538103	3.41926	0.000627918	0.0032784
Gm17173	ENSMUSG00000090709.2	58.6925	1.83953	0.321445	5.72269	1.04851e-08	1.59994e-07
Rab25	ENSMUSG00000008601.12	31.4871	1.83883	0.331088	5.55391	2.79355e-08	3.93858e-07
Gm16556	ENSMUSG00000090192.1	12.1434	1.83617	0.68254	2.69019	0.00714104	0.0261857
Rdh10	ENSMUSG00000025921.7	917.98	1.83576	0.210889	8.70485	3.18005e-18	1.8141e-16
Golm1	ENSMUSG00000021556.12	1222.27	1.83544	0.267142	6.87066	6.39064e-12	1.66408e-10
Gm15562	ENSMUSG00000089870.1	52.7294	1.83535	0.431704	4.25141	2.12427e-05	0.000161014
Gm44993	ENSMUSG00000109248.1	14.1161	1.83509	0.480688	3.81762	0.000134744	0.000845161
Gm29232	ENSMUSG00000100046.1	20.6598	1.83479	0.670103	2.73807	0.00618012	0.0231989
Olfml2b	ENSMUSG00000038463.8	209.317	1.83338	0.19528	9.38843	6.09029e-21	4.7643e-19
Sec1	ENSMUSG00000040364.8	0.312255	1.83321	2.84418	0.644549	0.51922	NA
Crybg2	ENSMUSG00000012123.17	12.1331	1.83234	1.00898	1.81603	0.0693661	0.162081
Akr1c14	ENSMUSG00000033715.15	2306.27	1.83198	0.321153	5.70438	1.1677e-08	1.77744e-07
Gm12253	ENSMUSG00000058287.5	0.311219	1.82916	3.13911	0.5827	0.560095	NA
Gm15402	ENSMUSG00000079524.2	0.311219	1.82916	3.13911	0.5827	0.560095	NA
H2-Q7	ENSMUSG00000060550.16	828.434	1.82727	0.89003	2.05305	0.0400682	0.106002
Gm5602	ENSMUSG00000086108.2	0.310836	1.82713	3.13927	0.582023	0.560551	NA
Zfp599	ENSMUSG00000062794.8	7.387	1.82692	0.683011	2.67481	0.00747722	0.0271819
Grm1	ENSMUSG00000019828.13	3.54909	1.82504	1.93431	0.943513	0.345418	0.519641
Slco6d1	ENSMUSG00000026336.13	1.19806	1.82417	2.4469	0.745502	0.455968	0.623518
Gm17189	ENSMUSG00000091709.1	44.969	1.82363	0.564535	3.23032	0.00123652	0.00591462
Mmd	ENSMUSG00000003948.17	643.474	1.82333	0.151292	12.0517	1.8997e-33	4.45829e-31
Gm5082	ENSMUSG00000054258.9	5.54016	1.82115	0.868747	2.09629	0.0360564	0.0973758
Mfsd2a	ENSMUSG00000028655.11	134.998	1.81799	0.263051	6.91118	4.80641e-12	1.28033e-10
Gdf6	ENSMUSG00000051279.2	6.58334	1.81777	0.625522	2.90601	0.00366069	0.0149921
Trib1	ENSMUSG00000032501.9	43.9308	1.81724	0.299691	6.06371	1.33015e-09	2.35765e-08
Gm13032	ENSMUSG00000085918.1	0.308143	1.81669	3.14008	0.578548	0.562894	NA
Gm37294	ENSMUSG00000104111.1	0.308143	1.81669	3.14008	0.578548	0.562894	NA
Serpinb9b	ENSMUSG00000021403.3	41.833	1.81614	0.343017	5.2946	1.19275e-07	1.49922e-06
A330069E16Rik	ENSMUSG00000097868.1	0.30776	1.81514	2.84969	0.63696	0.524151	NA
Gm13230	ENSMUSG00000082082.1	0.30776	1.81514	2.84969	0.63696	0.524151	NA
Adamts16	ENSMUSG00000049538.14	250.741	1.81458	0.268361	6.76172	1.36365e-11	3.32721e-10
1700003G18Rik	ENSMUSG00000087621.7	1.60468	1.81402	1.56994	1.15547	0.247897	0.416608
Axin2	ENSMUSG00000000142.15	1068.83	1.81344	0.221754	8.17773	2.89235e-16	1.30791e-14
Gm15264	ENSMUSG00000081355.1	105.108	1.81059	0.251628	7.19551	6.22278e-13	1.90067e-11
Tmprss11e	ENSMUSG00000054537.8	83.9519	1.81014	0.407986	4.43678	9.13132e-06	7.57471e-05
Gm13657	ENSMUSG00000086813.1	1.31021	1.80867	1.47872	1.22313	0.22128	0.383879
Gm42902	ENSMUSG00000106396.1	15.6177	1.80843	0.633536	2.8545	0.00431053	0.0171754
4930412L05Rik	ENSMUSG00000087192.7	2.51309	1.80637	0.879872	2.05299	0.0400738	0.106002
AW112010	ENSMUSG00000075010.4	8.17732	1.80625	1.027	1.75877	0.0786168	0.178622
5330439M10Rik	ENSMUSG00000112470.1	0.30513	1.80469	3.14101	0.574558	0.56559	NA
Gm15979	ENSMUSG00000087016.1	0.30513	1.80469	3.14101	0.574558	0.56559	NA
Gm45709	ENSMUSG00000110706.1	0.30513	1.80469	3.14101	0.574558	0.56559	NA
Gm35281	ENSMUSG00000114774.1	2.20351	1.80392	1.14993	1.56872	0.116712	0.242127
Atp2b2	ENSMUSG00000030302.16	2734.32	1.8039	0.481141	3.74921	0.000177391	0.00107901
E330023G01Rik	ENSMUSG00000102013.1	2.11465	1.80361	1.11098	1.62344	0.104496	0.222567
Gm39318	ENSMUSG00000110774.1	0.304684	1.80206	3.14122	0.573683	0.566182	NA
Ptpn5	ENSMUSG00000030854.17	1179.29	1.79925	0.21336	8.43294	3.37085e-17	1.73118e-15
CT010491.1	ENSMUSG00000117146.1	10.1022	1.79867	0.576795	3.11839	0.00181845	0.00826325
Srp54b	ENSMUSG00000112449.1	1.84222	1.795	1.6929	1.06031	0.289004	0.460756
Cd164l2	ENSMUSG00000028865.14	1.17759	1.79471	2.43598	0.736749	0.461275	0.627974
Gm29477	ENSMUSG00000101258.1	0.302054	1.79347	2.85727	0.627688	0.530208	NA
Hesx1	ENSMUSG00000040726.10	0.302054	1.79347	2.85727	0.627688	0.530208	NA
Vmn1r42	ENSMUSG00000068232.3	33.1124	1.79344	0.553372	3.24093	0.00119142	0.00572993
Tprg	ENSMUSG00000048399.4	2.8081	1.7909	1.14022	1.57066	0.116262	0.241458
Gm21909	ENSMUSG00000093963.1	0.301018	1.78947	2.85867	0.62598	0.531328	NA
Car5b	ENSMUSG00000031373.4	389.351	1.78844	0.314247	5.6912	1.26151e-08	1.91082e-07
Csrnp1	ENSMUSG00000032515.8	322.035	1.7865	0.189841	9.41052	4.93712e-21	3.91172e-19
Plxnb3	ENSMUSG00000031385.14	4.22046	1.7862	0.838795	2.12949	0.033214	0.0914095
Naip6	ENSMUSG00000078942.10	358.411	1.78405	0.117142	15.2298	2.24258e-52	1.6631e-49
Pglyrp1	ENSMUSG00000030413.7	112.703	1.7823	0.385784	4.61996	3.83817e-06	3.50947e-05
9530080O11Rik	ENSMUSG00000044125.6	3.44742	1.78045	1.1306	1.57478	0.115307	0.23996
C130073E24Rik	ENSMUSG00000110246.1	0.298978	1.77935	3.14301	0.566131	0.571305	NA
Shisa9	ENSMUSG00000022494.15	81.7056	1.77912	0.538201	3.30569	0.000947442	0.00470548
Slc15a3	ENSMUSG00000024737.2	133.243	1.77709	0.613861	2.89494	0.00379228	0.0154491
Irf1	ENSMUSG00000018899.16	1323.04	1.77666	0.655388	2.71085	0.00671104	0.0248995
Gm7568	ENSMUSG00000089982.7	0.560747	1.77553	3.1052	0.571792	0.567463	NA
1700094M24Rik	ENSMUSG00000107895.1	0.297942	1.77516	3.14334	0.564738	0.572252	NA
Ces2c	ENSMUSG00000061825.10	0.297942	1.77516	3.14334	0.564738	0.572252	NA
Gm15429	ENSMUSG00000040323.13	0.297942	1.77516	3.14334	0.564738	0.572252	NA
Gm15513	ENSMUSG00000086291.1	0.297942	1.77516	3.14334	0.564738	0.572252	NA
Acoxl	ENSMUSG00000027380.10	14.2872	1.7746	0.548063	3.23795	0.00120393	0.00578109
Cp	ENSMUSG00000003617.16	6417.8	1.77304	0.307644	5.7633	8.24844e-09	1.28509e-07
Lnx1	ENSMUSG00000029228.15	1575.19	1.77276	0.319858	5.54235	2.98438e-08	4.16575e-07
Bfsp2	ENSMUSG00000032556.11	0.296968	1.77155	3.14363	0.563536	0.57307	NA
Ccl20	ENSMUSG00000026166.14	0.296968	1.77155	3.14363	0.563536	0.57307	NA
Clca4b	ENSMUSG00000074195.3	0.296968	1.77155	3.14363	0.563536	0.57307	NA
Gm12551	ENSMUSG00000081169.1	0.296968	1.77155	3.14363	0.563536	0.57307	NA
Gm35657	ENSMUSG00000110747.1	0.296968	1.77155	3.14363	0.563536	0.57307	NA
Gm48544	ENSMUSG00000113049.1	0.296968	1.77155	3.14363	0.563536	0.57307	NA
Gm5092	ENSMUSG00000102080.2	0.296968	1.77155	3.14363	0.563536	0.57307	NA
Sel1l2	ENSMUSG00000074764.11	0.296968	1.77155	3.14363	0.563536	0.57307	NA
Slc24a5	ENSMUSG00000035183.14	0.296968	1.77155	3.14363	0.563536	0.57307	NA
Clcf1	ENSMUSG00000040663.8	626.055	1.77149	0.310414	5.70687	1.15074e-08	1.75306e-07
Mypn	ENSMUSG00000020067.8	4.95386	1.77044	0.651516	2.71741	0.00657942	0.0244699
Cxcl16	ENSMUSG00000018920.11	150.043	1.76998	0.340208	5.20265	1.96462e-07	2.37136e-06
Slc2a6	ENSMUSG00000036067.12	64.3835	1.7692	0.817958	2.16294	0.0305456	0.0855202
Avpi1	ENSMUSG00000018821.3	43.6304	1.76739	0.282401	6.25842	3.8889e-10	7.50263e-09
St14	ENSMUSG00000031995.9	1075.36	1.76576	0.456616	3.86706	0.000110156	0.000702301
Tmc4	ENSMUSG00000019734.16	675.981	1.76292	0.350306	5.03251	4.84108e-07	5.35843e-06
Gm671	ENSMUSG00000116116.1	84.407	1.76214	0.405661	4.34388	1.3999e-05	0.000111153
1700108F19Rik	ENSMUSG00000101009.6	5.60137	1.76114	0.918148	1.91814	0.0550932	0.135937
Gm42477	ENSMUSG00000106967.1	10.9714	1.75994	0.577133	3.04945	0.00229263	0.0100586
Slc40a1	ENSMUSG00000025993.10	1061.78	1.75897	0.143214	12.2822	1.12942e-34	2.82966e-32
Cxcl3	ENSMUSG00000029379.10	0.293892	1.75871	3.14466	0.559268	0.575979	NA
Cyp4a29	ENSMUSG00000083138.3	0.293892	1.75871	3.14466	0.559268	0.575979	NA
Foxn1	ENSMUSG00000002057.4	0.293892	1.75871	3.14466	0.559268	0.575979	NA
Gm36908	ENSMUSG00000112630.1	0.293892	1.75871	3.14466	0.559268	0.575979	NA
Sprr2d	ENSMUSG00000042212.3	0.293892	1.75871	3.14466	0.559268	0.575979	NA
Gm10552	ENSMUSG00000073628.5	1.29442	1.75703	1.53074	1.14783	0.251039	0.420515
Erv3	ENSMUSG00000037482.2	3.44296	1.75701	0.898931	1.95455	0.0506363	0.1273
Erich2os	ENSMUSG00000086515.1	4.11997	1.75648	0.709737	2.47484	0.0133297	0.0437481
Osbpl3	ENSMUSG00000029822.15	8459.14	1.75641	0.187707	9.35718	8.18894e-21	6.27367e-19
B4galnt4	ENSMUSG00000055629.5	3.67708	1.75532	1.41986	1.23626	0.216362	0.377972
Gm30648	ENSMUSG00000106139.1	0.846263	1.75526	2.08859	0.840405	0.400681	0.57302
Ctr9	ENSMUSG00000005609.16	1226.91	1.75452	0.187705	9.34722	8.99838e-21	6.83729e-19
Prom1	ENSMUSG00000029086.15	86241.9	1.75437	0.660896	2.65454	0.00794168	0.0285905
9230109A22Rik	ENSMUSG00000051237.7	2.54257	1.75436	1.14555	1.53146	0.125657	0.255279
Il34	ENSMUSG00000031750.15	497.035	1.75283	0.427269	4.1024	4.08895e-05	0.000290345
Esr2	ENSMUSG00000021055.14	6.75827	1.74761	1.09395	1.59753	0.110148	0.231694
Cdca7	ENSMUSG00000055612.15	134.762	1.74706	0.313095	5.57996	2.40576e-08	3.43892e-07
Tubb3	ENSMUSG00000062380.4	0.290816	1.74578	3.1457	0.554974	0.578913	NA
Zfp534	ENSMUSG00000062518.7	0.290816	1.74578	3.1457	0.554974	0.578913	NA
C1qtnf3	ENSMUSG00000058914.12	157.756	1.74481	0.278197	6.27186	3.56763e-10	6.91159e-09
Fam83e	ENSMUSG00000054161.12	3.71564	1.74293	0.8048	2.16567	0.0303365	0.085046
Micall2	ENSMUSG00000036718.17	192.488	1.74256	0.275108	6.33408	2.38766e-10	4.73446e-09
Gm45052	ENSMUSG00000108313.1	0.830758	1.74036	2.0356	0.854959	0.392574	0.56535
Fga	ENSMUSG00000028001.16	0.526078	1.73862	2.61494	0.664878	0.506129	NA
4930592A05Rik	ENSMUSG00000115779.1	0.534146	1.73852	2.6059	0.667149	0.504677	NA
Gm14102	ENSMUSG00000086478.1	3.13249	1.73726	1.15333	1.50629	0.131992	0.264468
Id1	ENSMUSG00000042745.9	1.63922	1.73698	1.25854	1.38015	0.167539	0.314009
Tgfb3	ENSMUSG00000021253.7	309.288	1.73626	0.215465	8.0582	7.74288e-16	3.35404e-14
1110036E04Rik	ENSMUSG00000097036.1	0.28774	1.73278	3.14676	0.550653	0.581871	NA
5830405F06Rik	ENSMUSG00000103586.5	0.28774	1.73278	3.14676	0.550653	0.581871	NA
Fut1	ENSMUSG00000008461.6	0.28774	1.73278	3.14676	0.550653	0.581871	NA
Gm10610	ENSMUSG00000094841.2	0.28774	1.73278	3.14676	0.550653	0.581871	NA
Gm12865	ENSMUSG00000087238.1	0.28774	1.73278	3.14676	0.550653	0.581871	NA
Gm15056	ENSMUSG00000082976.10	0.28774	1.73278	3.14676	0.550653	0.581871	NA
Prl8a9	ENSMUSG00000006490.3	0.28774	1.73278	3.14676	0.550653	0.581871	NA
Spib	ENSMUSG00000008193.13	0.28774	1.73278	3.14676	0.550653	0.581871	NA
Spink2	ENSMUSG00000053030.11	0.28774	1.73278	3.14676	0.550653	0.581871	NA
Vmn2r-ps159	ENSMUSG00000057021.13	0.28774	1.73278	3.14676	0.550653	0.581871	NA
Zfp541	ENSMUSG00000078796.4	0.28774	1.73278	3.14676	0.550653	0.581871	NA
Gm15271	ENSMUSG00000086148.1	5.77791	1.73131	0.649903	2.66395	0.00772279	0.0279268
Pacsin1	ENSMUSG00000040276.15	10.9326	1.73088	1.10675	1.56393	0.117834	0.243496
Gm14408	ENSMUSG00000078876.10	1.62968	1.73082	2.42677	0.713219	0.47571	0.641477
Gm16306	ENSMUSG00000089780.1	0.533109	1.7289	2.12204	0.814735	0.415224	NA
Thbs2	ENSMUSG00000023885.9	200.133	1.72828	0.325907	5.30299	1.1392e-07	1.43875e-06
Slc39a2	ENSMUSG00000072572.9	1.7002	1.72706	1.28641	1.34254	0.179421	0.330073
Crmp1	ENSMUSG00000029121.16	28.7973	1.72636	1.04812	1.64711	0.0995364	0.214383
Gm20429	ENSMUSG00000092591.1	23.1119	1.72599	0.994584	1.73539	0.0826721	0.185809
F2rl1	ENSMUSG00000021678.9	80.1537	1.72315	0.205064	8.40298	4.35293e-17	2.18117e-15
Pls1	ENSMUSG00000049493.13	498.252	1.72313	0.362645	4.75157	2.01842e-06	1.95719e-05
CT486005.1	ENSMUSG00000117011.1	4.71689	1.72284	0.756009	2.27887	0.0226748	0.0672949
Ptger2	ENSMUSG00000037759.6	61.6067	1.72175	0.32973	5.22168	1.77305e-07	2.14992e-06
Srpx2	ENSMUSG00000031253.15	105.153	1.72164	0.320578	5.37042	7.85556e-08	1.02205e-06
Dsc2	ENSMUSG00000024331.11	222.598	1.72161	0.287021	5.99821	1.99507e-09	3.444e-08
Aspg	ENSMUSG00000037686.6	257.665	1.72161	0.481539	3.57522	0.000349928	0.00196298
Dact2	ENSMUSG00000048826.7	42.082	1.7197	0.323388	5.31777	1.05049e-07	1.33765e-06
Gsap	ENSMUSG00000039934.12	6191.23	1.71846	0.348745	4.92756	8.32642e-07	8.72157e-06
Mettl7a2	ENSMUSG00000056487.8	0.815712	1.71796	3.08152	0.557505	0.577183	0.726573
Eya2	ENSMUSG00000017897.18	2202.99	1.71744	0.383958	4.47298	7.71357e-06	6.53608e-05
Rxfp2	ENSMUSG00000053368.13	875.678	1.71664	0.437269	3.92583	8.64317e-05	0.000565037
Izumo1r	ENSMUSG00000031933.17	1.27614	1.71509	2.02337	0.84764	0.396639	0.56924
AC171111.1	ENSMUSG00000117254.1	0.525331	1.71415	2.65099	0.646605	0.517887	NA
Gm45030	ENSMUSG00000109338.2	0.815172	1.71315	2.03404	0.84224	0.399654	0.572169
Sh2d5	ENSMUSG00000045349.15	48.2486	1.71228	0.352699	4.85478	1.20522e-06	1.21981e-05
Gpr39	ENSMUSG00000026343.6	897.528	1.71039	0.37905	4.51231	6.41254e-06	5.54776e-05
Osr1	ENSMUSG00000048387.8	53.067	1.70946	0.332675	5.13854	2.76887e-07	3.22455e-06
Glipr1l3	ENSMUSG00000112611.1	0.517222	1.70791	2.12831	0.80247	0.422281	NA
Fam110c	ENSMUSG00000036136.9	60.2885	1.70631	0.42571	4.00816	6.11942e-05	0.000416804
Gm26786	ENSMUSG00000097026.1	298.66	1.70484	0.274606	6.20831	5.35559e-10	1.00397e-08
Akr1b3	ENSMUSG00000001642.18	306.379	1.70469	0.226997	7.50977	5.92295e-14	2.11583e-12
Batf2	ENSMUSG00000039699.13	340.187	1.70448	0.753243	2.26285	0.0236448	0.0696497
H2-Q6	ENSMUSG00000073409.12	200.359	1.70392	0.860474	1.98022	0.0476793	0.121292
Cntnap4	ENSMUSG00000031772.17	29.8258	1.70185	0.471128	3.61228	0.000303513	0.00173623
4930557K07Rik	ENSMUSG00000108034.1	0.807663	1.70089	2.49918	0.680577	0.496139	0.658665
Gm47904	ENSMUSG00000113788.1	0.850286	1.69871	1.53885	1.10388	0.269644	0.4406
A2ml1	ENSMUSG00000047228.9	0.512552	1.69619	2.12863	0.796846	0.425541	NA
Crisp2	ENSMUSG00000023930.14	1.48347	1.69436	2.41886	0.700479	0.483629	0.648476
Gm26703	ENSMUSG00000097877.2	4.36476	1.69317	0.773423	2.18919	0.0285829	0.0812023
Samd10	ENSMUSG00000038605.11	12.1428	1.6927	0.66759	2.53554	0.0112275	0.0379711
Arhgap27	ENSMUSG00000034255.17	1021.79	1.69266	0.330407	5.12297	3.00757e-07	3.472e-06
Ceacam16	ENSMUSG00000014686.8	5.37005	1.6922	1.20291	1.40675	0.159501	0.303234
Htr7	ENSMUSG00000024798.15	507.758	1.69181	0.680202	2.48721	0.0128748	0.0425563
Kcnk12	ENSMUSG00000050138.8	2.41598	1.69115	1.09392	1.54595	0.122117	0.249923
Sirpb1c	ENSMUSG00000074677.11	677.969	1.69113	1.09068	1.55053	0.121015	0.248188
Pim1	ENSMUSG00000024014.8	646.183	1.69006	0.132945	12.7125	5.03794e-37	1.50651e-34
Capsl	ENSMUSG00000039676.4	57.3726	1.68812	0.339895	4.96661	6.81346e-07	7.2934e-06
Ccl7	ENSMUSG00000035373.2	21.5144	1.68773	0.628767	2.68419	0.00727062	0.0265977
Capn5	ENSMUSG00000035547.14	965.741	1.68686	0.37342	4.51732	6.26273e-06	5.43082e-05
Bspry	ENSMUSG00000028392.15	290.146	1.68682	0.368249	4.58066	4.63512e-06	4.16756e-05
A530013C23Rik	ENSMUSG00000006462.6	72.5259	1.68644	0.338967	4.97523	6.51711e-07	7.00448e-06
Gm37907	ENSMUSG00000104314.1	0.824281	1.68568	1.74911	0.963736	0.335178	0.508777
Atp2c2	ENSMUSG00000034112.9	612.124	1.68555	0.48331	3.48752	0.000487527	0.00262602
Casp4	ENSMUSG00000033538.13	2320.42	1.68422	0.367666	4.58084	4.63119e-06	4.16605e-05
Map3k9	ENSMUSG00000042724.8	434.885	1.68418	0.363781	4.62967	3.66256e-06	3.36491e-05
Pdzk1	ENSMUSG00000038298.14	45.4766	1.68302	0.467712	3.59842	0.000320159	0.001818
Ank	ENSMUSG00000022265.7	1404.47	1.68135	0.219387	7.66387	1.80417e-14	6.79863e-13
Esrp2	ENSMUSG00000084128.10	35.2928	1.68062	0.47342	3.54995	0.000385304	0.00213495
Mapk13	ENSMUSG00000004864.13	307.595	1.68054	0.494747	3.39676	0.000681887	0.00351856
4930500F04Rik	ENSMUSG00000107214.3	4.36311	1.67844	0.810118	2.07184	0.0382801	0.102229
4930586N03Rik	ENSMUSG00000087097.1	0.504432	1.67644	2.12948	0.787251	0.431135	NA
Gm12132	ENSMUSG00000085301.1	4.91092	1.67594	0.826801	2.02702	0.0426604	0.111164
Gm15848	ENSMUSG00000086706.7	18.6356	1.67511	0.454417	3.68628	0.000227558	0.00134747
Gm1647	ENSMUSG00000094763.3	0.801625	1.67401	1.54279	1.08505	0.277899	0.4499
Gm38171	ENSMUSG00000102196.1	1.93573	1.674	1.49378	1.12065	0.262439	0.43281
AU015336	ENSMUSG00000090203.2	120.893	1.67363	0.214725	7.79433	6.47529e-15	2.56521e-13
Plet1os	ENSMUSG00000101304.1	12.4189	1.67238	0.500969	3.33829	0.000842966	0.00424868
Gm49364	ENSMUSG00000115344.1	84.1682	1.67218	0.350579	4.76977	1.84441e-06	1.79409e-05
CT009718.1	ENSMUSG00000116646.1	1.13009	1.67203	1.66607	1.00358	0.315582	0.488098
Gm20757	ENSMUSG00000098040.1	68.6355	1.67017	0.298651	5.59238	2.23982e-08	3.21909e-07
Sh3bgrl2	ENSMUSG00000032261.16	3598.89	1.66883	0.170059	9.81323	9.87551e-23	9.24707e-21
Pcyt1b	ENSMUSG00000035246.16	131.269	1.66785	0.241745	6.89921	5.22934e-12	1.38305e-10
Gm20149	ENSMUSG00000111227.1	0.791402	1.66721	2.03053	0.821071	0.411606	0.582755
Rab11fip1	ENSMUSG00000031488.14	599.898	1.66639	0.37997	4.38559	1.15673e-05	9.36905e-05
4933413C19Rik	ENSMUSG00000089952.1	5.53649	1.66547	0.689323	2.41609	0.0156881	0.0501132
Far1os	ENSMUSG00000084984.8	0.500661	1.66496	2.6664	0.624422	0.53235	NA
Fut2	ENSMUSG00000055978.5	595.699	1.66486	0.440802	3.77688	0.000158803	0.000976518
Gm47507	ENSMUSG00000113757.1	10.6249	1.66459	0.741227	2.24572	0.0247218	0.0722139
Utp14b	ENSMUSG00000079470.8	170.844	1.66277	0.133145	12.4884	8.63316e-36	2.3538e-33
Ccdc42	ENSMUSG00000045915.15	0.498343	1.65924	2.62508	0.632072	0.52734	NA
Hoxaas2	ENSMUSG00000056445.8	0.497897	1.65824	2.12967	0.778638	0.436193	NA
Fam184b	ENSMUSG00000015879.8	259.578	1.65741	0.425977	3.89085	9.98926e-05	0.000641944
Noc4l	ENSMUSG00000033294.11	22.4551	1.65694	0.365069	4.5387	5.6603e-06	4.95945e-05
Rrad	ENSMUSG00000031880.7	5.9228	1.65634	0.683158	2.42453	0.0153282	0.0491925
Arl4c	ENSMUSG00000049866.12	1074.87	1.65561	0.143718	11.5199	1.04778e-30	1.83263e-28
Alkal1	ENSMUSG00000087247.3	5.12413	1.65368	0.666641	2.48062	0.0131155	0.0431673
Taf7	ENSMUSG00000051316.8	1.19192	1.65316	1.67619	0.986263	0.324004	0.497354
Casp6	ENSMUSG00000027997.9	47.7713	1.65272	0.26959	6.13048	8.76126e-10	1.59405e-08
Krt87	ENSMUSG00000047641.8	2.87871	1.6518	1.03807	1.59122	0.111561	0.233922
Slc22a1	ENSMUSG00000023829.9	4.49828	1.65163	1.08034	1.5288	0.126314	0.256221
Htra4	ENSMUSG00000037406.7	46.796	1.65088	0.438306	3.7665	0.00016555	0.0010123
Ncmap	ENSMUSG00000043924.16	129.938	1.65073	0.242445	6.80869	9.84926e-12	2.48105e-10
Gm5149	ENSMUSG00000105797.1	11.964	1.65027	0.702506	2.34912	0.0188176	0.0579436
Usp43	ENSMUSG00000020905.11	702.203	1.64926	0.410691	4.01582	5.92399e-05	0.000404087
Gm31305	ENSMUSG00000105245.1	9.78897	1.64894	0.564456	2.9213	0.00348578	0.0143646
Rad18	ENSMUSG00000030254.16	8399.52	1.64787	0.236289	6.97396	3.08152e-12	8.37704e-11
Itga11	ENSMUSG00000032243.8	253.529	1.64707	0.199678	8.24859	1.60268e-16	7.52243e-15
Acsbg1	ENSMUSG00000032281.11	13.7584	1.64334	0.921313	1.78369	0.0744742	0.171352
Col6a4	ENSMUSG00000032572.9	2729.89	1.64109	0.24594	6.67273	2.51095e-11	5.81913e-10
Glis3	ENSMUSG00000052942.13	52999.7	1.63772	0.205747	7.95987	1.72219e-15	7.19133e-14
Tex2	ENSMUSG00000040548.16	4207.58	1.6369	0.241487	6.77843	1.21487e-11	3.01356e-10
Gm19276	ENSMUSG00000115151.1	0.774159	1.63677	1.98499	0.824573	0.409614	0.580866
Gm48954	ENSMUSG00000115517.1	0.490076	1.63665	2.13002	0.768372	0.442266	NA
2200002D01Rik	ENSMUSG00000030587.5	2.01417	1.63622	1.25573	1.303	0.192575	0.346905
Mrm2	ENSMUSG00000029557.7	1.49739	1.63481	1.24892	1.30898	0.190543	0.344381
Serpine3	ENSMUSG00000091155.1	0.513375	1.63478	2.60015	0.628724	0.52953	NA
Gm17196	ENSMUSG00000090708.1	0.498186	1.63468	2.61832	0.624324	0.532415	NA
Gal3st2	ENSMUSG00000094651.2	4.839	1.63419	0.970205	1.68438	0.0921089	0.201856
Sik1	ENSMUSG00000024042.7	157.508	1.6333	0.22599	7.22733	4.92595e-13	1.53491e-11
Gm36431	ENSMUSG00000109831.1	0.770451	1.63227	1.80572	0.903945	0.366025	0.539908
Txndc2	ENSMUSG00000050612.6	1.94336	1.63144	1.21775	1.33972	0.180338	0.331397
Sval2	ENSMUSG00000014104.12	358.393	1.63088	0.516349	3.15849	0.0015859	0.00733232
Ighg1	ENSMUSG00000076614.7	0.495173	1.63047	2.12387	0.767687	0.442673	NA
Trim43a	ENSMUSG00000090693.4	0.771083	1.63027	2.02852	0.803674	0.421585	0.592229
Cacna1i	ENSMUSG00000022416.15	2.30967	1.62925	2.40924	0.676251	0.498881	0.660692
Gm29376	ENSMUSG00000101955.1	1.13206	1.62924	1.49483	1.08992	0.27575	0.447319
Gm20475	ENSMUSG00000092559.1	19.8991	1.62843	0.358879	4.53754	5.69134e-06	4.98193e-05
Zfp184	ENSMUSG00000006720.16	86.5034	1.62608	0.225867	7.1993	6.05224e-13	1.85469e-11
Gm6377	ENSMUSG00000048621.3	19.6839	1.62594	0.578961	2.80837	0.00497922	0.0193694
Ano5	ENSMUSG00000055489.8	485.885	1.62507	0.240341	6.7615	1.3657e-11	3.32721e-10
Gm34106	ENSMUSG00000102300.1	0.784205	1.62469	2.02039	0.804147	0.421312	0.592105
Rnd1	ENSMUSG00000054855.13	66.4406	1.62159	0.313003	5.18074	2.21005e-07	2.6367e-06
Gpr35	ENSMUSG00000026271.15	91.1825	1.62111	0.540168	3.00112	0.00268986	0.0115147
Pof1b	ENSMUSG00000034607.6	57.4526	1.61959	0.334063	4.84814	1.24625e-06	1.25301e-05
Sytl2	ENSMUSG00000030616.15	1833.43	1.61916	0.215509	7.51319	5.77042e-14	2.06532e-12
Dcxr	ENSMUSG00000039450.11	41.2632	1.61904	0.313245	5.16862	2.35833e-07	2.78563e-06
Gm6980	ENSMUSG00000111357.1	1.1019	1.61871	1.45484	1.11264	0.265864	0.43694
Ccdc86	ENSMUSG00000024732.7	69.7655	1.61849	0.259436	6.23848	4.4184e-10	8.41039e-09
9930012K11Rik	ENSMUSG00000044551.13	11.0971	1.61845	0.750423	2.15672	0.0310273	0.0865814
Klra6	ENSMUSG00000061769.2	3.11092	1.61838	1.49004	1.08613	0.277422	0.449285
Gm30918	ENSMUSG00000114665.1	13.2007	1.61656	0.494528	3.2689	0.00107968	0.00527325
Oas3	ENSMUSG00000032661.9	52.8115	1.61588	0.562451	2.87293	0.00406679	0.0163597
Gm1123	ENSMUSG00000044860.9	15.8634	1.61174	0.489566	3.29218	0.000994148	0.0049046
Arhgef4	ENSMUSG00000037509.20	887.129	1.61109	0.374456	4.30249	1.68891e-05	0.000131124
Prss23	ENSMUSG00000039405.7	4618.67	1.6106	0.307062	5.24518	1.56133e-07	1.91702e-06
Ptch2	ENSMUSG00000028681.11	12.9049	1.60973	0.724326	2.22238	0.0262579	0.0759589
Kctd19	ENSMUSG00000051648.13	4.51255	1.60954	1.43665	1.12034	0.262568	0.432982
Gm29685	ENSMUSG00000112910.1	7.02576	1.60936	0.734448	2.19125	0.0284334	0.0808149
P3h2	ENSMUSG00000038168.5	2366.52	1.60887	0.182674	8.8073	1.282e-18	7.69201e-17
5830416I19Rik	ENSMUSG00000106219.1	3.8355	1.60864	0.705859	2.27899	0.0226678	0.0672849
Serpinb11	ENSMUSG00000026327.8	4.78703	1.60818	1.08324	1.48461	0.137648	0.272242
Gm826	ENSMUSG00000074623.4	7.82984	1.60815	0.715495	2.2476	0.0246018	0.0719541
Aspn	ENSMUSG00000021388.14	1729.57	1.60804	0.306387	5.24839	1.53435e-07	1.8864e-06
D6Ertd527e	ENSMUSG00000090891.3	7.6545	1.60733	0.70705	2.27329	0.0230088	0.0680465
Gm6558	ENSMUSG00000103499.5	0.48902	1.6066	2.66491	0.60287	0.546595	NA
AC129178.1	ENSMUSG00000116555.1	44.9681	1.60628	0.259202	6.19704	5.75348e-10	1.07206e-08
Rasl10b	ENSMUSG00000020684.14	15.0098	1.60578	0.515591	3.11444	0.00184292	0.008356
Kit	ENSMUSG00000005672.12	566.805	1.6052	0.223363	7.18653	6.64606e-13	2.01337e-11
1700066O22Rik	ENSMUSG00000085800.7	304.42	1.60465	0.212682	7.5448	4.5298e-14	1.64671e-12
4930519F16Rik	ENSMUSG00000031325.15	13.4348	1.60393	0.510615	3.14117	0.00168273	0.00772695
Gm20404	ENSMUSG00000092625.2	3.70709	1.60303	0.792167	2.0236	0.043011	0.111841
H2-T-ps	ENSMUSG00000073405.6	0.757173	1.60202	2.06888	0.774341	0.438729	0.608356
Fgf18	ENSMUSG00000057967.12	27.1516	1.60188	0.620044	2.5835	0.00978048	0.0339062
Ccdc88b	ENSMUSG00000047810.8	29.0327	1.60141	0.700457	2.28624	0.0222405	0.0662179
Gm28643	ENSMUSG00000100135.1	0.487011	1.60081	2.66584	0.60049	0.54818	NA
Ackr2	ENSMUSG00000044534.8	59.4226	1.60027	0.312067	5.12798	2.92872e-07	3.3979e-06
Esrp1	ENSMUSG00000040728.15	2004.55	1.60004	0.387101	4.13338	3.57464e-05	0.000257474
Spo11	ENSMUSG00000005883.15	6.48348	1.59995	1.72241	0.9289	0.352941	0.526896
Phf21b	ENSMUSG00000016624.15	942.861	1.59933	0.202507	7.89764	2.84242e-15	1.16332e-13
Ociad2	ENSMUSG00000029153.11	154.039	1.59853	0.181349	8.8147	1.20008e-18	7.27105e-17
Chat	ENSMUSG00000021919.8	9.2746	1.5983	1.24652	1.28221	0.19977	0.356571
Pdcd1lg2	ENSMUSG00000016498.9	12.794	1.59762	1.31286	1.2169	0.223642	0.386748
Ovol2	ENSMUSG00000037279.13	110.208	1.59726	0.515127	3.10072	0.00193051	0.00868938
Ocln	ENSMUSG00000021638.12	757.728	1.59725	0.398876	4.00438	6.21814e-05	0.000422287
Gm8093	ENSMUSG00000087052.1	0.756832	1.59596	2.5035	0.637491	0.523805	0.682551
Pmaip1	ENSMUSG00000024521.7	11.267	1.59487	0.594948	2.68068	0.0073472	0.0267933
Mogat2	ENSMUSG00000052396.7	8.06836	1.59207	0.829086	1.92027	0.0548241	0.135399
A930001C03Rik	ENSMUSG00000087132.7	34.969	1.59147	0.234819	6.77744	1.22321e-11	3.02782e-10
Kdf1	ENSMUSG00000037600.16	150.382	1.59078	0.313717	5.07076	3.96236e-07	4.47123e-06
Gm29904	ENSMUSG00000116299.1	9.44176	1.58974	1.09086	1.45733	0.145027	0.28321
Tnfsf15	ENSMUSG00000050395.8	7.71962	1.58942	0.667693	2.38046	0.017291	0.0540782
Gm11714	ENSMUSG00000087113.1	1.06929	1.5893	1.65121	0.962503	0.335797	0.509425
Cpn1	ENSMUSG00000025196.4	130.898	1.58887	0.372949	4.26028	2.04172e-05	0.000155456
Col25a1	ENSMUSG00000058897.17	169.038	1.58862	0.869209	1.82766	0.0676007	0.159091
Crybg1	ENSMUSG00000019866.14	393.796	1.58704	0.220175	7.20809	5.67411e-13	1.74458e-11
Spns3	ENSMUSG00000020798.14	109.222	1.58553	0.214812	7.38101	1.57093e-13	5.31478e-12
Cd44	ENSMUSG00000005087.17	24331.5	1.58456	0.278077	5.69827	1.21032e-08	1.83929e-07
F830016B08Rik	ENSMUSG00000090942.1	29.6996	1.58381	0.65251	2.42727	0.0152131	0.0488992
Gm45847	ENSMUSG00000109814.1	38.2173	1.58347	0.358753	4.41382	1.01563e-05	8.32809e-05
Gm805	ENSMUSG00000097543.1	1.14034	1.58152	1.50934	1.04782	0.294721	0.46674
Gm11528	ENSMUSG00000084856.1	2.37882	1.58119	0.956847	1.6525	0.0984326	0.212499
Ttbk1	ENSMUSG00000015599.9	22.1174	1.58072	0.380625	4.15296	3.28201e-05	0.000238823
Gm42716	ENSMUSG00000105264.1	2537.36	1.57974	0.670972	2.3544	0.0185526	0.0572608
Plpp2	ENSMUSG00000052151.12	299.543	1.5777	0.291239	5.41718	6.05456e-08	8.01224e-07
Tex43	ENSMUSG00000032900.14	3.95778	1.57645	1.28233	1.22936	0.218935	0.381202
Plin2	ENSMUSG00000028494.12	1191.28	1.57524	0.238714	6.59889	4.14255e-11	9.34341e-10
S100a3	ENSMUSG00000001021.12	3.90467	1.57114	0.998147	1.57405	0.115475	0.240201
Hexb	ENSMUSG00000021665.9	3454.08	1.57093	0.858133	1.83064	0.067154	0.15828
Rab15	ENSMUSG00000021062.15	229.301	1.56882	0.356732	4.39775	1.0938e-05	8.88261e-05
Egr1	ENSMUSG00000038418.7	3.41518	1.56881	0.839022	1.86981	0.0615101	0.147903
Endod1	ENSMUSG00000037419.9	424.533	1.56813	0.145378	10.7866	3.98429e-27	5.47176e-25
Gm45715	ENSMUSG00000108493.1	1.50775	1.5676	1.21848	1.28652	0.19826	0.354493
Bcl2a1d	ENSMUSG00000099974.1	9.84668	1.56633	0.731953	2.13993	0.0323605	0.0896003
Gm45877	ENSMUSG00000110486.1	1.51473	1.56625	1.27409	1.22931	0.218955	0.381202
Plk2	ENSMUSG00000021701.8	151.122	1.56494	0.302582	5.17194	2.3167e-07	2.74277e-06
Adamts4	ENSMUSG00000006403.13	397.139	1.56464	0.126785	12.3409	5.45661e-35	1.38583e-32
BC030500	ENSMUSG00000049946.7	1.12153	1.564	1.50498	1.03922	0.298703	0.471154
Ido2	ENSMUSG00000031549.16	7.71174	1.56333	1.73579	0.900645	0.367777	0.541502
Gpc2	ENSMUSG00000029510.15	174.382	1.56294	0.194769	8.02457	1.01884e-15	4.38267e-14
Ogn	ENSMUSG00000021390.6	934.592	1.5621	0.340922	4.582	4.60556e-06	4.14702e-05
Klrc1	ENSMUSG00000030167.15	23.5615	1.56061	1.00342	1.55528	0.119879	0.246622
Cyr61	ENSMUSG00000028195.4	259.298	1.55909	0.241894	6.44533	1.1535e-10	2.42469e-09
Myo5b	ENSMUSG00000025885.18	4569.2	1.55838	0.335246	4.64847	3.3441e-06	3.10267e-05
B3gnt3	ENSMUSG00000031803.8	43.1813	1.55708	0.388707	4.00579	6.18097e-05	0.00042007
Proser2	ENSMUSG00000045319.13	575.529	1.5566	0.300676	5.17698	2.25501e-07	2.68343e-06
B230208H11Rik	ENSMUSG00000097378.8	7.03553	1.55642	0.691558	2.2506	0.0244107	0.0714967
Naip3-ps1	ENSMUSG00000114576.1	33.9809	1.55598	0.259528	5.99542	2.02966e-09	3.48538e-08
Dhh	ENSMUSG00000023000.5	2.19391	1.55535	1.00184	1.55249	0.120545	0.247497
Skil	ENSMUSG00000027660.16	2221.93	1.5552	0.173131	8.98279	2.6399e-19	1.7356e-17
Car9	ENSMUSG00000028463.14	14.0556	1.55356	0.42085	3.69148	0.000222956	0.00132107
Gm48278	ENSMUSG00000112074.1	2.51954	1.5519	0.961466	1.6141	0.106506	0.226085
Tex16	ENSMUSG00000034555.14	1.51827	1.55069	1.20543	1.28642	0.198296	0.354524
Gm29571	ENSMUSG00000101537.1	4.93578	1.55044	0.667533	2.32264	0.0201985	0.0612857
Gm49319	ENSMUSG00000115781.1	7.34716	1.54964	0.713687	2.17132	0.0299072	0.084092
Gm10248	ENSMUSG00000068680.1	2.42419	1.54875	1.13454	1.36508	0.172228	0.32056
Nfkbia	ENSMUSG00000021025.8	85.0235	1.54834	0.370315	4.18116	2.90029e-05	0.000213717
Acat3	ENSMUSG00000062480.12	4.43889	1.54761	1.38294	1.11907	0.263108	0.433641
2010016I18Rik	ENSMUSG00000091575.2	28.8762	1.54708	0.525855	2.94204	0.00326059	0.0135907
Sell	ENSMUSG00000026581.14	99.1076	1.54682	0.999348	1.54783	0.121663	0.249295
Ighg2c	ENSMUSG00000076612.8	1.70657	1.54546	2.42539	0.637199	0.523996	0.682651
Rad51b	ENSMUSG00000059060.15	31149.6	1.54402	0.187145	8.25039	1.57883e-16	7.42931e-15
Stk32a	ENSMUSG00000039954.8	56.2446	1.54133	0.317712	4.85135	1.22624e-06	1.23645e-05
Myoz3	ENSMUSG00000049173.7	1.08149	1.54098	1.6526	0.93246	0.351099	0.525203
Myo5c	ENSMUSG00000033590.8	720.306	1.53873	0.304481	5.05363	4.33495e-07	4.84448e-06
P2ry14	ENSMUSG00000036381.13	497.936	1.53868	0.349203	4.40626	1.05171e-05	8.60111e-05
Aplp1	ENSMUSG00000006651.8	1.511	1.53653	1.35352	1.13521	0.256288	0.426265
Cidea	ENSMUSG00000024526.8	3.18448	1.53618	1.03739	1.48081	0.138656	0.273855
Adssl1	ENSMUSG00000011148.14	33.4271	1.53566	0.545383	2.81575	0.00486631	0.019006
Gm4788	ENSMUSG00000070594.10	29.0644	1.53483	0.393389	3.90157	9.55714e-05	0.0006176
Tprn	ENSMUSG00000048707.9	102.495	1.53352	0.329574	4.65304	3.27081e-06	3.04422e-05
Gm34759	ENSMUSG00000115441.1	4.05709	1.53071	0.696831	2.19667	0.0280441	0.0799659
Ier3	ENSMUSG00000003541.6	4.74399	1.53029	0.638382	2.39714	0.0165236	0.052162
Omd	ENSMUSG00000048368.9	11.8312	1.52995	0.534143	2.8643	0.00417934	0.016722
Ptrh1	ENSMUSG00000053746.8	7.96268	1.52966	0.703602	2.17404	0.0297022	0.0837341
Gm49164	ENSMUSG00000115289.1	37.0187	1.52858	0.33227	4.60041	4.21661e-06	3.83028e-05
Slc12a2	ENSMUSG00000024597.10	987.929	1.52543	0.137366	11.1049	1.18801e-28	1.77626e-26
Gm30524	ENSMUSG00000107638.2	59.2214	1.52515	0.373932	4.07868	4.52926e-05	0.000316877
Gm4793	ENSMUSG00000054412.5	3.67712	1.52512	0.76677	1.98902	0.0466989	0.119314
Gm15884	ENSMUSG00000087327.1	28.329	1.5239	0.463081	3.29078	0.000999095	0.00492115
Efcab5	ENSMUSG00000050944.14	258.758	1.52389	0.334214	4.55964	5.12423e-06	4.55388e-05
Elfn1	ENSMUSG00000048988.8	10.4932	1.52335	0.516557	2.94905	0.00318757	0.0133403
Gm49507	ENSMUSG00000115871.1	1.50428	1.52302	1.2713	1.198	0.230918	0.396116
Itih3	ENSMUSG00000006522.17	18.1153	1.52228	0.626492	2.42985	0.015105	0.0486108
Faah	ENSMUSG00000034171.13	78.3669	1.52225	0.29682	5.12855	2.91988e-07	3.39189e-06
Olfm2	ENSMUSG00000032172.8	56.9701	1.52055	0.378623	4.016	5.91949e-05	0.000403928
9630001P10Rik	ENSMUSG00000097825.5	10.9663	1.52027	0.698159	2.17754	0.0294402	0.0831539
AC103362.1	ENSMUSG00000117608.1	42.5345	1.5173	0.326786	4.64308	3.43253e-06	3.17086e-05
D7Ertd443e	ENSMUSG00000030994.15	25.9423	1.51719	0.609527	2.48912	0.0128058	0.0423889
Gad1os	ENSMUSG00000087264.1	17.7415	1.51698	0.487833	3.10964	0.00187317	0.00846417
Gm26719	ENSMUSG00000097364.1	14.2576	1.51505	0.427339	3.54532	0.000392136	0.00216827
Abca14	ENSMUSG00000062017.15	3.44649	1.51495	1.07737	1.40616	0.159677	0.303464
H2-Q4	ENSMUSG00000035929.11	163.63	1.5147	0.552622	2.74094	0.00612636	0.0230111
Tac1	ENSMUSG00000061762.12	1.02224	1.51362	2.47983	0.610372	0.541615	0.697208
Gm34933	ENSMUSG00000107714.1	1.56328	1.51358	1.42941	1.05888	0.289653	0.461236
Garem1	ENSMUSG00000042680.8	2907.38	1.51287	0.190131	7.95697	1.76309e-15	7.34557e-14
Gm47283	ENSMUSG00000096768.7	8920.78	1.51281	1.09838	1.37731	0.168417	0.315304
Ccl3	ENSMUSG00000000982.5	1.06317	1.51278	1.70409	0.887739	0.374681	0.547666
Gm16685	ENSMUSG00000097804.1	325.526	1.51247	0.574837	2.63114	0.00850998	0.0302135
Fndc3a	ENSMUSG00000033487.14	36584.7	1.51104	0.128118	11.7941	4.18745e-32	8.77564e-30
Arid5b	ENSMUSG00000019947.10	21475.4	1.5109	0.0942839	16.025	8.54476e-58	8.33788e-55
Btbd16	ENSMUSG00000040298.6	1.66158	1.50919	2.46743	0.611647	0.540771	0.69634
Gpr141	ENSMUSG00000053101.3	503.027	1.50913	1.01409	1.48816	0.136709	0.270891
Agbl3	ENSMUSG00000038836.15	3107.52	1.50864	0.282073	5.34841	8.87312e-08	1.1448e-06
Lgals3	ENSMUSG00000050335.17	1257.88	1.50862	0.335211	4.50051	6.77908e-06	5.82951e-05
Lsmem1	ENSMUSG00000071342.5	21.1933	1.50672	0.598808	2.5162	0.0118628	0.039757
Gm36107	ENSMUSG00000115439.1	6.00251	1.5066	0.66697	2.25887	0.0238913	0.0702196
Alcam	ENSMUSG00000022636.13	40233.3	1.50414	0.197493	7.6162	2.61245e-14	9.68698e-13
Acsl3	ENSMUSG00000032883.15	2840.98	1.50322	0.141178	10.6477	1.78776e-26	2.33417e-24
Plppr3	ENSMUSG00000035835.14	72.1419	1.50315	0.413911	3.63159	0.000281677	0.00162688
BC107364	ENSMUSG00000046317.14	21.4119	1.50242	0.936793	1.60379	0.108761	0.22962
Maff	ENSMUSG00000042622.14	152.121	1.50076	0.166546	9.01105	2.04093e-19	1.36111e-17
Trim72	ENSMUSG00000042828.12	4.70851	1.49913	0.716769	2.09151	0.0364824	0.0982545
Ankrd1	ENSMUSG00000024803.8	8.24902	1.49771	0.840157	1.78266	0.0746419	0.17161
Arhgef16	ENSMUSG00000029032.12	212.114	1.49761	0.425076	3.52316	0.000426441	0.00233566
Tgif1	ENSMUSG00000047407.17	1155.34	1.49698	0.159975	9.35759	8.15759e-21	6.27367e-19
Baiap2l1	ENSMUSG00000038859.7	612.79	1.49637	0.207783	7.20159	5.95139e-13	1.8268e-11
Bnipl	ENSMUSG00000028115.16	56.1664	1.49587	0.537697	2.782	0.00540251	0.0207247
AI839979	ENSMUSG00000107355.1	2.50986	1.49554	0.855726	1.74769	0.0805183	0.182094
Gm7173	ENSMUSG00000073077.6	171.198	1.49473	0.207936	7.18843	6.5541e-13	1.99202e-11
Clcn2	ENSMUSG00000022843.17	633.348	1.49347	0.340845	4.38166	1.17781e-05	9.51487e-05
Map7	ENSMUSG00000019996.17	4781.95	1.49278	0.267067	5.58954	2.2767e-08	3.26703e-07
Cd6	ENSMUSG00000024670.16	35.8475	1.49275	1.32494	1.12666	0.259888	0.429939
Fbxw9	ENSMUSG00000008167.14	117.204	1.49238	0.23667	6.30573	2.86834e-10	5.61552e-09
Pdxk	ENSMUSG00000032788.15	209.362	1.49224	0.303929	4.90982	9.11587e-07	9.46295e-06
Gm48228	ENSMUSG00000114036.1	3.22719	1.49163	0.731213	2.03994	0.0413559	0.108511
Gfra1	ENSMUSG00000025089.15	417.439	1.49133	0.437122	3.4117	0.000645583	0.00335833
Gm15205	ENSMUSG00000087146.1	1.12867	1.49073	1.38627	1.07535	0.282218	0.454037
Olfr18	ENSMUSG00000066896.6	11.8418	1.48968	0.548587	2.71549	0.00661785	0.0245931
Tpsab1	ENSMUSG00000024173.11	2.5761	1.48702	1.00233	1.48356	0.137926	0.272719
Barx2	ENSMUSG00000032033.11	279.046	1.48631	0.39618	3.7516	0.000175711	0.0010695
Cfap206	ENSMUSG00000028294.15	1.4381	1.48523	1.99563	0.744238	0.456733	0.624287
Hk2	ENSMUSG00000000628.10	793.024	1.48443	0.341819	4.34273	1.4072e-05	0.000111446
AC144408.1	ENSMUSG00000116608.1	0.745798	1.48076	2.14679	0.689756	0.490348	0.653985
Pdk4	ENSMUSG00000019577.6	103.305	1.48038	0.428573	3.45422	0.000551889	0.00292422
4930512B01Rik	ENSMUSG00000020992.5	3.57833	1.47929	0.744731	1.98634	0.0469951	0.11988
Art5	ENSMUSG00000070424.12	3.83952	1.47928	1.51615	0.975682	0.329222	0.502687
Gm13028	ENSMUSG00000087628.1	0.765979	1.47875	2.56738	0.575975	0.564632	0.715859
H2-K1	ENSMUSG00000061232.15	3910.2	1.47763	0.661221	2.23469	0.0254374	0.073886
Cldn1	ENSMUSG00000022512.3	27.2024	1.47713	0.399384	3.69851	0.000216867	0.00128828
Egln3	ENSMUSG00000035105.5	74.5891	1.47549	0.332076	4.44321	8.86261e-06	7.38153e-05
Smim9	ENSMUSG00000073094.9	2.63957	1.4743	1.60149	0.920577	0.357272	0.531393
Kif1a	ENSMUSG00000014602.15	133.794	1.47371	0.318002	4.63427	3.58207e-06	3.29749e-05
4930455C13Rik	ENSMUSG00000112654.1	4.02491	1.47322	0.900224	1.63651	0.101734	0.218228
Pla2g2e	ENSMUSG00000028751.13	2.23268	1.47302	1.2285	1.19904	0.230514	0.395642
Itga2	ENSMUSG00000015533.9	2024.69	1.47295	0.23546	6.25563	3.95916e-10	7.62231e-09
Dnah6	ENSMUSG00000052861.13	138.024	1.47169	0.28697	5.12839	2.92238e-07	3.39267e-06
Gm11494	ENSMUSG00000085074.1	2.05371	1.47111	1.42768	1.03042	0.302813	0.475655
Gm15657	ENSMUSG00000090214.8	12.6234	1.47034	0.675805	2.17569	0.0295785	0.0834807
Kcnk2	ENSMUSG00000037624.15	5632.36	1.46854	0.275503	5.33041	9.79922e-08	1.25555e-06
Gm26561	ENSMUSG00000097625.1	19009	1.46797	0.793453	1.8501	NA	NA
Cyp24a1	ENSMUSG00000038567.5	0.72425	1.46696	2.09937	0.698762	0.484701	0.64935
Cebpd	ENSMUSG00000071637.5	17.1921	1.46693	0.404686	3.62485	0.000289127	0.00166317
Smpdl3b	ENSMUSG00000028885.8	45.7703	1.46518	0.393147	3.72681	0.000193918	0.00116691
CT571247.2	ENSMUSG00000117297.1	3.13433	1.4646	1.08344	1.3518	0.176439	0.326173
Mxd1	ENSMUSG00000001156.9	482.594	1.46414	0.380096	3.85203	0.000117144	0.000742769
Gm6209	ENSMUSG00000102715.1	11.3772	1.46295	0.859637	1.70182	0.0887892	0.19611
Gzma	ENSMUSG00000023132.8	6.3392	1.46087	1.06727	1.3688	0.171063	0.318808
Efhb	ENSMUSG00000023931.5	715.031	1.46084	0.192756	7.57873	3.48944e-14	1.28108e-12
Platr16	ENSMUSG00000085101.7	33.0198	1.46027	0.319649	4.56836	4.91546e-06	4.39617e-05
Adora1	ENSMUSG00000042429.8	27.0096	1.46017	0.815804	1.78986	0.0734769	0.169705
Atp12a	ENSMUSG00000022229.3	53.1761	1.46016	0.487826	2.9932	0.00276066	0.0117824
Clec2f	ENSMUSG00000089728.2	29.7432	1.45874	0.328361	4.44248	8.89283e-06	7.40337e-05
Slc36a2	ENSMUSG00000020264.5	1.70599	1.45825	1.42513	1.02324	0.306195	0.478717
Tuba4a	ENSMUSG00000026202.13	139.736	1.45746	0.231206	6.30373	2.90564e-10	5.68254e-09
Nap1l5	ENSMUSG00000055430.4	1.46794	1.45636	1.73269	0.840522	0.400616	0.57302
Trpm3	ENSMUSG00000052387.15	9478.01	1.45619	0.5747	2.53382	0.0112827	0.03813
Trim63	ENSMUSG00000028834.13	17.6334	1.45487	0.509222	2.85705	0.00427602	0.0170636
Marveld2	ENSMUSG00000021636.15	221.605	1.45486	0.28523	5.10067	3.38458e-07	3.87107e-06
Gm30232	ENSMUSG00000112842.1	11.3672	1.45422	0.600931	2.41995	0.0155228	0.0496624
Gm42884	ENSMUSG00000107090.1	1.83024	1.45386	1.22471	1.1871	0.235189	0.401473
Stk32b	ENSMUSG00000029123.8	11.7312	1.4538	0.791134	1.83761	0.0661193	0.156643
Ckmt1	ENSMUSG00000000308.14	279.497	1.4524	0.283888	5.11609	3.11928e-07	3.59648e-06
Kng2	ENSMUSG00000060459.14	766.134	1.4522	0.363939	3.99022	6.60118e-05	0.000445526
Ipcef1	ENSMUSG00000064065.15	1477.67	1.44934	0.272239	5.3238	1.01624e-07	1.29849e-06
Zan	ENSMUSG00000079173.11	9.17277	1.44813	0.738322	1.96138	0.0498343	0.125636
Gm32014	ENSMUSG00000111602.1	1782.7	1.44778	0.231792	6.24605	4.20966e-10	8.0378e-09
AI115009	ENSMUSG00000097745.1	78.8453	1.44707	0.286473	5.05134	4.38711e-07	4.8957e-06
Hmgb3	ENSMUSG00000015217.11	137.715	1.44681	0.335311	4.31483	1.59723e-05	0.000124633
Zfp553	ENSMUSG00000045598.10	24.7759	1.44593	0.363056	3.98266	6.81494e-05	0.000458284
Tmem184a	ENSMUSG00000036687.13	37.3262	1.44474	0.687913	2.10018	0.0357132	0.0966602
Tmem252	ENSMUSG00000048572.4	10.2718	1.44461	0.558383	2.58714	0.00967761	0.0336439
Gm26788	ENSMUSG00000096992.3	0.751937	1.44367	2.08031	0.693971	0.487701	0.651767
Ackr4	ENSMUSG00000079355.5	103.621	1.44232	0.468157	3.08084	0.00206419	0.00919512
Stoml3	ENSMUSG00000027744.4	0.702697	1.4416	3.09308	0.466072	0.641164	0.776281
Gm17216	ENSMUSG00000084823.2	10.2273	1.44133	0.599208	2.40538	0.0161555	0.0513057
Tmem37	ENSMUSG00000050777.7	9.4837	1.44006	0.490005	2.93888	0.00329405	0.0137024
Btg1	ENSMUSG00000036478.8	35.1275	1.43981	0.33418	4.30849	1.64371e-05	0.000127936
Col4a3	ENSMUSG00000079465.8	806.058	1.43968	0.196871	7.31283	2.61576e-13	8.53807e-12
Treml1	ENSMUSG00000023993.7	13.7163	1.43928	0.792217	1.81677	0.0692523	0.161946
Treml2	ENSMUSG00000071068.7	21.4199	1.43799	0.75377	1.90772	0.0564268	0.138582
Rasef	ENSMUSG00000043003.14	778.709	1.4379	0.316417	4.54432	5.51132e-06	4.84265e-05
Map3k19	ENSMUSG00000051590.9	5.77198	1.43772	0.668217	2.15157	0.0314312	0.0875097
2900011O08Rik	ENSMUSG00000044117.12	13.2433	1.43732	0.490459	2.93056	0.00338352	0.0140209
4930404N11Rik	ENSMUSG00000020234.10	3.20928	1.43545	1.34002	1.07121	0.284073	0.455795
Slc1a1	ENSMUSG00000024935.10	713.921	1.43532	0.271581	5.28506	1.25663e-07	1.57524e-06
Ctss	ENSMUSG00000038642.10	555.691	1.43504	0.63104	2.27409	0.0229607	0.0679583
Rhpn2	ENSMUSG00000030494.13	505.861	1.43485	0.407499	3.5211	0.000429754	0.00235242
Olfr1259	ENSMUSG00000068806.5	4.54874	1.43424	0.82358	1.74147	0.0816009	0.183892
Hrh2	ENSMUSG00000034987.4	68.1103	1.43351	0.684604	2.09392	0.0362668	0.0977732
Tmc7	ENSMUSG00000042246.5	27.2682	1.4332	0.292435	4.90091	9.53952e-07	9.85307e-06
Gm26858	ENSMUSG00000097861.1	35.704	1.42957	0.283224	5.04748	4.47674e-07	4.9879e-06
Gm5544	ENSMUSG00000074388.3	5.92295	1.42941	0.574246	2.48919	0.0128033	0.042388
Osm	ENSMUSG00000058755.3	6.68574	1.42932	0.849185	1.68317	0.0923422	0.202247
Ly6g6d	ENSMUSG00000073413.9	26.4747	1.42874	0.503069	2.84004	0.00451076	0.0178467
Spag16	ENSMUSG00000053153.14	12.0599	1.4278	0.621124	2.29873	0.0215202	0.0644458
Zfp36	ENSMUSG00000044786.6	6.30407	1.42664	0.734741	1.94169	0.052175	0.130244
C2cd6	ENSMUSG00000072295.5	0.743154	1.42575	2.56939	0.554898	0.578965	0.727981
Shroom4	ENSMUSG00000068270.15	4466.9	1.42548	0.257108	5.54426	2.95207e-08	4.12756e-07
Gtf2f2	ENSMUSG00000067995.4	3229.07	1.42544	0.179877	7.92449	2.29082e-15	9.43817e-14
Gm43351	ENSMUSG00000105769.1	2.20982	1.42514	1.38145	1.03163	0.302247	0.475087
Gm20560	ENSMUSG00000107546.1	1.00504	1.42499	1.71846	0.829221	0.40698	0.578644
Gm27177	ENSMUSG00000098975.7	2.55379	1.423	1.99884	0.711911	0.47652	0.642195
Gm49377	ENSMUSG00000113506.1	3.17423	1.42269	0.899433	1.58177	0.113703	0.237259
Gm11724	ENSMUSG00000087669.1	0.696225	1.4225	1.77464	0.801568	0.422803	0.593217
Gm20139	ENSMUSG00000111052.1	9.61509	1.42245	0.627659	2.26627	0.0234347	0.0691018
Rnase10	ENSMUSG00000021872.8	0.72928	1.42243	1.762	0.807284	0.419503	0.59024
Alpk2	ENSMUSG00000032845.15	4.77418	1.42141	0.860903	1.65107	0.0987248	0.212981
Klf5	ENSMUSG00000005148.8	176.067	1.42137	0.250426	5.67582	1.38028e-08	2.0721e-07
Gimap7	ENSMUSG00000043931.10	7.60678	1.42094	1.34091	1.05968	0.289289	0.461023
Gabre	ENSMUSG00000031340.8	19.9263	1.42013	0.361643	3.92688	8.60544e-05	0.000563166
Gm38843	ENSMUSG00000109556.1	0.702636	1.41955	1.77126	0.801435	0.42288	0.593239
Fosl1	ENSMUSG00000024912.5	7.00447	1.4182	0.576328	2.46075	0.0138645	0.0451834
Tnxa	ENSMUSG00000092200.1	0.740046	1.41803	2.07885	0.682121	0.495162	0.657804
Gm21917	ENSMUSG00000096111.7	16.4425	1.41685	0.451567	3.13763	0.00170317	0.00781217
Cd101	ENSMUSG00000086564.9	35.5167	1.41444	0.592693	2.38646	0.0170115	0.0534073
Gm42951	ENSMUSG00000105254.1	0.71537	1.41418	1.58815	0.890461	0.373218	0.546561
Gm13965	ENSMUSG00000085508.1	21.4354	1.41358	0.32586	4.338	1.43782e-05	0.000113573
Traf4	ENSMUSG00000017386.10	32.5551	1.41204	0.566856	2.491	0.0127384	0.0422186
Tg	ENSMUSG00000053469.14	17.8097	1.40936	0.742061	1.89925	0.0575318	0.140609
Oasl1	ENSMUSG00000041827.15	482.399	1.40732	0.394011	3.57179	0.000354554	0.00198473
Gm37459	ENSMUSG00000104283.1	17.9031	1.40624	0.487976	2.88179	0.00395429	0.0160085
Nop10	ENSMUSG00000027133.3	0.688126	1.40569	1.77292	0.792871	0.427853	0.597859
Acpp	ENSMUSG00000032561.15	167.509	1.40561	0.289756	4.85102	1.22826e-06	1.23693e-05
Mak	ENSMUSG00000021363.14	131.82	1.40375	0.563216	2.49239	0.0126887	0.0420763
Tigit	ENSMUSG00000071552.5	5.0025	1.40231	1.1779	1.19051	0.233844	0.399804
Adgb	ENSMUSG00000050994.20	278.591	1.40141	0.717551	1.95305	0.0508138	0.12762
Rnf19b	ENSMUSG00000028793.15	2287.67	1.3982	0.300964	4.64574	3.38855e-06	3.13648e-05
Gm48651	ENSMUSG00000111091.1	1.03457	1.39588	1.55768	0.896125	0.370186	0.543877
Tlr2	ENSMUSG00000027995.10	31.0493	1.39517	0.380913	3.6627	0.000249569	0.00146286
Ccl2	ENSMUSG00000035385.5	25.7357	1.39475	0.59416	2.34742	0.0189038	0.0581607
Gm14537	ENSMUSG00000082855.1	1.4131	1.39447	1.29234	1.07902	0.280577	0.452308
Gm12703	ENSMUSG00000052767.5	1.4016	1.39284	1.34605	1.03476	0.300781	0.473265
Tbc1d2	ENSMUSG00000039813.14	164.277	1.39061	0.270265	5.14535	2.67016e-07	3.11351e-06
G530011O06Rik	ENSMUSG00000072844.6	2.21693	1.38925	1.59463	0.871202	0.383644	0.556553
Tmem177	ENSMUSG00000036975.5	0.695114	1.38796	1.76493	0.786412	0.431626	0.601364
Pgpep1	ENSMUSG00000056204.8	767.994	1.3869	0.15686	8.8416	9.43544e-19	5.81173e-17
Ntn4	ENSMUSG00000020019.4	664.212	1.38684	0.161437	8.59057	8.65357e-18	4.7049e-16
Tc2n	ENSMUSG00000021187.14	4039.93	1.38524	0.172095	8.04929	8.32776e-16	3.59062e-14
Tspan33	ENSMUSG00000001763.14	228.933	1.3844	0.294626	4.69884	2.61646e-06	2.48892e-05
H2-Q5	ENSMUSG00000055413.12	91.1702	1.38403	0.686695	2.0155	0.0438527	0.113694
Gpr171	ENSMUSG00000050075.8	8.45818	1.383	0.862455	1.60356	0.108812	0.22969
1700027I24Rik	ENSMUSG00000098304.2	1.49567	1.38241	1.63749	0.844225	0.398544	0.571109
Marveld3	ENSMUSG00000001672.14	136.617	1.38154	0.394239	3.50431	0.000457788	0.00248605
Hectd2os	ENSMUSG00000087579.7	196.149	1.37742	0.237828	5.79169	6.96837e-09	1.09672e-07
Gm28802	ENSMUSG00000099719.1	2.45988	1.37597	0.993607	1.38483	0.166105	0.312078
Kif5c	ENSMUSG00000026764.15	1410.9	1.37593	0.177181	7.76564	8.12336e-15	3.18408e-13
Rab19	ENSMUSG00000029923.4	10.0561	1.37558	0.532068	2.58536	0.00972787	0.0337776
Samd12	ENSMUSG00000058656.13	11928.4	1.37291	0.143055	9.59703	8.22775e-22	6.99736e-20
Gm44571	ENSMUSG00000109046.1	1.01915	1.37258	1.36022	1.00909	0.312931	0.485187
Irs2	ENSMUSG00000038894.7	136.557	1.37115	0.211343	6.48778	8.71109e-11	1.85636e-09
Gm49328	ENSMUSG00000113416.1	3.1417	1.36897	0.889585	1.53889	0.123832	0.25229
AC163635.1	ENSMUSG00000117575.1	17.0434	1.36889	0.696842	1.96442	0.0494813	0.124889
Slc16a1	ENSMUSG00000032902.1	132.409	1.36837	0.251287	5.44546	5.1673e-08	6.9121e-07
Gm11454	ENSMUSG00000086152.1	0.676453	1.36785	1.76655	0.774309	0.438748	0.608356
Cyp2j8	ENSMUSG00000082932.3	9.47493	1.36762	0.427754	3.19722	0.0013876	0.00653446
Gm10479	ENSMUSG00000073184.4	32.1059	1.36757	0.263847	5.18318	2.18138e-07	2.60585e-06
Il12b	ENSMUSG00000004296.14	4.79485	1.3663	1.06628	1.28138	0.200062	0.356957
Cyp4f18	ENSMUSG00000003484.4	101.748	1.36546	0.622748	2.19264	0.0283331	0.0805792
Tjp2	ENSMUSG00000024812.10	5888.22	1.36532	0.14126	9.66529	4.23419e-22	3.73819e-20
Ptpn22	ENSMUSG00000027843.13	1617.37	1.36518	0.450434	3.03081	0.00243897	0.0105989
Myoz2	ENSMUSG00000028116.13	24.4924	1.36473	0.383754	3.55625	0.00037618	0.00209127
Fmn2	ENSMUSG00000028354.13	232.367	1.36417	0.330155	4.13192	3.59749e-05	0.000258718
Ptgs2os	ENSMUSG00000097028.2	6.45807	1.36416	0.577358	2.36276	0.0181396	0.0561557
2610307P16Rik	ENSMUSG00000085936.7	6315.73	1.36241	0.138914	9.80765	1.04375e-22	9.67556e-21
Gm31898	ENSMUSG00000109996.1	1.05529	1.3623	1.56133	0.87253	0.382919	0.555981
Pfkl	ENSMUSG00000020277.10	224.463	1.36212	0.20426	6.66857	2.583e-11	5.96374e-10
Bcl2a1a	ENSMUSG00000102037.1	4.07356	1.36203	1.20183	1.13329	0.257091	0.427293
Tuba1c	ENSMUSG00000043091.9	70.9784	1.36052	0.23719	5.73602	9.69284e-09	1.49257e-07
Smpd1	ENSMUSG00000037049.9	3.74727	1.35901	0.7973	1.70451	0.0882857	0.195301
Gm49392	ENSMUSG00000114635.1	561.742	1.3584	0.214221	6.34113	2.28086e-10	4.54211e-09
Gm15401	ENSMUSG00000072999.9	0.424975	1.35685	3.13134	0.433314	0.664787	NA
Gm36495	ENSMUSG00000114018.1	0.432701	1.35685	3.13134	0.433314	0.664787	NA
Gm15940	ENSMUSG00000086313.1	2.32766	1.35532	0.967402	1.40099	0.161217	0.305557
AC154546.2	ENSMUSG00000116720.1	16.2776	1.35503	0.655645	2.06671	0.0387613	0.103117
Zfp52	ENSMUSG00000051341.6	622.255	1.35422	0.160734	8.42523	3.60055e-17	1.83391e-15
Grik4	ENSMUSG00000032017.14	126.491	1.353	0.375466	3.60353	0.000313929	0.00178876
Gdnf	ENSMUSG00000022144.4	74.4431	1.35263	0.205207	6.59151	4.35372e-11	9.76034e-10
Upp1	ENSMUSG00000020407.13	491.912	1.35048	0.457507	2.95183	0.00315896	0.0132355
1110028F11Rik	ENSMUSG00000085972.1	12.1285	1.35032	0.452653	2.98312	0.00285322	0.0121188
Zswim5	ENSMUSG00000033948.3	56.5293	1.34991	0.369823	3.65017	0.000262071	0.00153041
Cd200r2	ENSMUSG00000090176.1	1.12389	1.3485	1.99017	0.677582	0.498037	0.660108
Gm14429	ENSMUSG00000081574.1	2.0081	1.34753	1.09293	1.23295	0.217594	0.379439
1700110K17Rik	ENSMUSG00000087047.8	34.1308	1.34637	0.404194	3.33101	0.000865321	0.00434699
Sntg2	ENSMUSG00000020672.14	15632	1.34633	0.248751	5.41239	6.21891e-08	8.20631e-07
Spry2	ENSMUSG00000022114.5	37.032	1.34542	0.356677	3.77209	0.000161887	0.000993177
Nov	ENSMUSG00000037362.8	7.52644	1.34523	0.528463	2.54556	0.0109102	0.0371146
Slc7a11	ENSMUSG00000027737.10	230.28	1.34517	0.592575	2.27004	0.0232053	0.0684966
Smad7	ENSMUSG00000025880.11	1727.93	1.34366	0.0827615	16.2353	2.83959e-59	2.92478e-56
Bcl2l11	ENSMUSG00000027381.16	1337.2	1.3434	0.174369	7.70436	1.31496e-14	5.03706e-13
Rhbdf2	ENSMUSG00000020806.15	369.627	1.34238	0.276632	4.85259	1.21858e-06	1.23026e-05
Usp29	ENSMUSG00000051527.11	5.76402	1.34213	1.14182	1.17542	0.239826	0.407102
4930415O20Rik	ENSMUSG00000022993.7	1.04001	1.34208	1.50848	0.889687	0.373634	0.54691
Gm12068	ENSMUSG00000087085.1	6.33586	1.34199	0.945002	1.42009	0.155581	0.297954
Akr1c13	ENSMUSG00000021213.12	26.7977	1.34192	0.408973	3.28119	0.0010337	0.0050763
Gsr	ENSMUSG00000031584.16	1164.5	1.34184	0.142401	9.42296	4.38559e-21	3.55061e-19
Dnah14	ENSMUSG00000047369.15	7.39419	1.34147	0.703615	1.90654	0.0565796	0.138819
Nexmif	ENSMUSG00000046449.15	2575.17	1.34079	0.284511	4.71261	2.44562e-06	2.34446e-05
Col4a4	ENSMUSG00000067158.9	341.898	1.34063	0.234076	5.72731	1.02035e-08	1.56212e-07
Psg19	ENSMUSG00000004542.15	0.694947	1.34035	2.58076	0.519364	0.603507	0.74723
Plch2	ENSMUSG00000029055.17	378.494	1.33824	0.661574	2.02281	0.0430928	0.112006
4930597O21Rik	ENSMUSG00000053442.4	3.26536	1.33773	0.819532	1.63231	0.102614	0.219456
Gm11592	ENSMUSG00000086680.2	1.31404	1.33743	1.44041	0.928508	0.353144	0.527072
Ceacam5	ENSMUSG00000008789.10	1.31119	1.33683	1.42351	0.939112	0.347673	0.521839
Vmn1r38	ENSMUSG00000115170.1	4.29091	1.33675	0.713519	1.87347	0.0610039	0.147114
Olfr1392	ENSMUSG00000101750.3	7.4061	1.33534	1.78957	0.74618	0.455559	0.623095
Fzd5	ENSMUSG00000045005.9	1.30413	1.33512	1.21223	1.10137	0.270735	0.441723
Cfhr2	ENSMUSG00000033898.16	147.995	1.33424	0.294547	4.52979	5.90414e-06	5.15847e-05
Naip5	ENSMUSG00000071203.6	113.81	1.33292	0.235406	5.66224	1.49414e-08	2.22322e-07
Chil5	ENSMUSG00000043873.11	2.44432	1.33292	1.493	0.892782	0.371974	0.545558
AC122551.2	ENSMUSG00000116689.1	0.426995	1.33132	2.72758	0.488096	0.625482	NA
Ngf	ENSMUSG00000027859.10	2678.82	1.33081	0.201449	6.60619	3.94341e-11	8.92685e-10
Apol7e	ENSMUSG00000071716.5	21.5154	1.3296	0.74429	1.78639	0.0740354	0.170596
Cfap69	ENSMUSG00000040473.15	1944.94	1.32924	0.276695	4.80399	1.55532e-06	1.53545e-05
Samd13	ENSMUSG00000048652.12	107.371	1.32825	0.223437	5.94461	2.77113e-09	4.61191e-08
Epb41l4a	ENSMUSG00000024376.6	1305.8	1.32786	0.259173	5.12345	2.99996e-07	3.46754e-06
Mex3d	ENSMUSG00000048696.11	18.6443	1.32673	0.371728	3.56909	0.000358217	0.00200221
Nlrc5	ENSMUSG00000074151.13	2227.56	1.32663	0.613345	2.16295	0.0305452	0.0855202
Pamr1	ENSMUSG00000027188.8	3750.17	1.32474	0.208605	6.35044	2.14699e-10	4.29862e-09
Gm45871	ENSMUSG00000110277.1	191.98	1.32429	0.249527	5.30718	1.11334e-07	1.41169e-06
Armc10	ENSMUSG00000038525.16	791.344	1.32397	0.183669	7.20848	5.65789e-13	1.74458e-11
Htr1d	ENSMUSG00000070687.11	15.725	1.32359	0.977165	1.35452	0.175572	0.32499
Gm47127	ENSMUSG00000113185.1	1.03891	1.32341	1.28618	1.02894	0.303508	0.47612
Plscr1	ENSMUSG00000032369.13	518.436	1.32326	0.250942	5.27318	1.34077e-07	1.66831e-06
Ifngas1	ENSMUSG00000112230.1	11.087	1.32249	0.726023	1.82155	0.0685227	0.160779
Olfr60	ENSMUSG00000060112.4	12.5774	1.32141	0.925547	1.42771	0.153377	0.295056
Grm5	ENSMUSG00000049583.15	4.43372	1.32081	1.05241	1.25503	0.209467	0.368735
Celsr3	ENSMUSG00000023473.13	2.7683	1.32077	1.07878	1.22432	0.220831	0.383388
Foxj1	ENSMUSG00000034227.7	0.982801	1.31979	1.49646	0.881943	0.377808	0.550641
Clic6	ENSMUSG00000022949.9	1.34102	1.31718	1.43165	0.920046	0.357549	0.531619
Rac3	ENSMUSG00000018012.11	7.50705	1.31665	0.523831	2.5135	0.0119539	0.0400118
Cd3g	ENSMUSG00000002033.14	7.59554	1.31588	1.16271	1.13174	0.257745	0.427845
4930431P03Rik	ENSMUSG00000075042.10	14.3612	1.31474	0.473208	2.77835	0.00546355	0.020894
Gpr65	ENSMUSG00000021886.7	5.14091	1.31432	1.05449	1.2464	0.212618	0.373043
St6gal2	ENSMUSG00000024172.10	1.93167	1.31403	1.73682	0.756576	0.449304	0.617333
Hsf2bp	ENSMUSG00000002076.11	12.9638	1.31341	0.586565	2.23915	0.0251459	0.0732104
Itgal	ENSMUSG00000030830.18	311.57	1.31215	0.862162	1.52193	0.128028	0.258763
Gm19303	ENSMUSG00000115654.1	5.87197	1.31152	0.739066	1.77457	0.0759693	0.173907
Hhla1	ENSMUSG00000072511.2	0.436478	1.31075	2.70843	0.483952	0.62842	NA
Iqcn	ENSMUSG00000110622.1	0.436478	1.31075	2.70843	0.483952	0.62842	NA
Gm20752	ENSMUSG00000106053.1	0.652373	1.30935	3.09942	0.42245	0.672697	0.799782
Madcam1	ENSMUSG00000020310.9	0.65169	1.30935	3.09942	0.42245	0.672697	0.799782
Smox	ENSMUSG00000027333.18	8103.4	1.30917	0.19032	6.8788	6.0357e-12	1.58053e-10
Etfdh	ENSMUSG00000027809.14	1143.51	1.30902	0.224311	5.83573	5.35562e-09	8.57454e-08
Dhrs9	ENSMUSG00000027068.6	47.0883	1.30839	0.314226	4.16383	3.1295e-05	0.000229241
Ptprt	ENSMUSG00000053141.16	71.9431	1.30797	0.358656	3.64687	0.000265459	0.00154476
Bcl2a1b	ENSMUSG00000089929.1	33.4395	1.30795	0.540244	2.42103	0.0154764	0.0495481
Gm7582	ENSMUSG00000061852.8	14.3034	1.30717	0.547176	2.38894	0.016897	0.0531148
Igf2bp2	ENSMUSG00000033581.17	3429.15	1.30642	0.279256	4.67821	2.89389e-06	2.72903e-05
Slfn10-ps	ENSMUSG00000072621.13	66.8741	1.3058	0.278786	4.68389	2.81485e-06	2.65719e-05
Smim22	ENSMUSG00000096215.8	20.7993	1.30517	0.483814	2.69768	0.00698246	0.0257212
Tpbpa	ENSMUSG00000033834.7	13.0122	1.30493	0.600466	2.1732	0.029765	0.0838413
0610012D04Rik	ENSMUSG00000089755.1	5.71848	1.30279	0.69639	1.87077	0.0613769	0.147822
Majin	ENSMUSG00000024786.9	38.0167	1.30216	0.542288	2.40124	0.0163396	0.0517308
Gm13423	ENSMUSG00000081648.1	0.418833	1.30143	2.73212	0.476343	0.63383	NA
Gm10722	ENSMUSG00000091028.1	0.427293	1.30132	2.71941	0.478529	0.632274	NA
Gm14286	ENSMUSG00000087445.1	3.26251	1.30075	0.855095	1.52118	0.128215	0.259001
Gm4275	ENSMUSG00000099422.4	2.20211	1.30038	1.3486	0.964249	0.334921	0.508554
Ctsw	ENSMUSG00000024910.4	4.22925	1.29839	0.75946	1.70962	0.0873368	0.19371
Csf2rb2	ENSMUSG00000071714.7	173.906	1.29705	0.368097	3.52367	0.000425611	0.00233181
Tnfrsf9	ENSMUSG00000028965.13	285.714	1.29536	0.461471	2.80703	0.005	0.0194462
9230104L09Rik	ENSMUSG00000027446.2	0.415582	1.29234	3.13606	0.412089	0.680274	NA
Gm40538	ENSMUSG00000113001.1	0.407856	1.29234	3.13606	0.412089	0.680274	NA
Rnf43	ENSMUSG00000034177.15	1028.73	1.29171	0.251028	5.14566	2.66585e-07	3.11044e-06
Sfta2	ENSMUSG00000090509.2	5.89669	1.291	0.705939	1.82877	0.0674346	0.15874
Six4	ENSMUSG00000034460.9	14.974	1.29068	0.40063	3.22163	0.00127464	0.0060766
Gm34466	ENSMUSG00000113919.1	1.39054	1.29055	1.75089	0.737082	0.461073	0.627904
Vangl2	ENSMUSG00000026556.15	158.751	1.28958	0.328073	3.93076	8.46761e-05	0.000555126
Gch1	ENSMUSG00000037580.10	228.098	1.28776	0.235027	5.4792	4.27246e-08	5.76923e-07
Agtr1a	ENSMUSG00000049115.15	2136.79	1.28762	0.306089	4.20667	2.59157e-05	0.00019273
Actn2	ENSMUSG00000052374.16	268.878	1.28696	0.215506	5.97183	2.34605e-09	3.97584e-08
Sult1c2	ENSMUSG00000023122.6	0.40682	1.2867	2.74688	0.468422	0.639483	NA
Itgb2l	ENSMUSG00000000157.16	1.80271	1.28577	1.97198	0.652021	0.514388	0.674282
Bcl2l14	ENSMUSG00000030200.13	37.5583	1.28572	0.531926	2.4171	0.0156448	0.0499835
Prss30	ENSMUSG00000024124.10	2.34888	1.28545	1.50567	0.853743	0.393248	0.565969
Mbp	ENSMUSG00000041607.16	4438.56	1.28484	0.198376	6.47679	9.36922e-11	1.98975e-09
Epha5	ENSMUSG00000029245.16	4.05693	1.28428	2.04253	0.628768	0.529501	0.687654
Rab11fip4	ENSMUSG00000017639.13	18.0561	1.28416	0.475439	2.701	0.00691313	0.0255114
Pde8b	ENSMUSG00000021684.17	2588	1.28394	0.15416	8.32866	8.17632e-17	3.98918e-15
Gm33035	ENSMUSG00000112331.1	2.24314	1.28248	1.09354	1.17278	0.240883	0.408224
Serpinb2	ENSMUSG00000062345.10	0.998952	1.28192	1.54894	0.827614	0.407889	0.579351
1700065D16Rik	ENSMUSG00000096655.2	0.191827	1.28097	3.16075	0.405275	0.685275	NA
2610042L04Rik	ENSMUSG00000079388.9	0.191827	1.28097	3.16075	0.405275	0.685275	NA
4930438A08Rik	ENSMUSG00000069873.4	0.191827	1.28097	3.16075	0.405275	0.685275	NA
4930467E23Rik	ENSMUSG00000096265.2	0.205104	1.28097	3.16075	0.405275	0.685275	NA
4930479H17Rik	ENSMUSG00000109049.1	0.191827	1.28097	3.16075	0.405275	0.685275	NA
5730435O14Rik	ENSMUSG00000091370.1	0.191827	1.28097	3.16075	0.405275	0.685275	NA
9430069I07Rik	ENSMUSG00000094447.2	0.191827	1.28097	3.16075	0.405275	0.685275	NA
A630095E13Rik	ENSMUSG00000070313.8	0.191827	1.28097	3.16075	0.405275	0.685275	NA
AC118542.1	ENSMUSG00000116557.1	0.191827	1.28097	3.16075	0.405275	0.685275	NA
AC131068.1	ENSMUSG00000115198.1	0.194903	1.28097	3.16075	0.405275	0.685275	NA
AC134555.2	ENSMUSG00000117509.1	0.191827	1.28097	3.16075	0.405275	0.685275	NA
Agt	ENSMUSG00000031980.9	0.218972	1.28097	3.16075	0.405275	0.685275	NA
Atxn7l1os1	ENSMUSG00000079143.3	0.191827	1.28097	3.16075	0.405275	0.685275	NA
Calhm4	ENSMUSG00000039508.6	0.211847	1.28097	3.16075	0.405275	0.685275	NA
Calhm6	ENSMUSG00000046031.7	0.191827	1.28097	3.16075	0.405275	0.685275	NA
Ccdc38	ENSMUSG00000036168.15	0.191827	1.28097	3.16075	0.405275	0.685275	NA
Cckbr	ENSMUSG00000030898.15	0.218972	1.28097	3.16075	0.405275	0.685275	NA
Chrne	ENSMUSG00000014609.16	0.191827	1.28097	3.16075	0.405275	0.685275	NA
Crhbp	ENSMUSG00000021680.8	0.191827	1.28097	3.16075	0.405275	0.685275	NA
Ddx25	ENSMUSG00000032101.6	0.191827	1.28097	3.16075	0.405275	0.685275	NA
Doxl2	ENSMUSG00000068536.11	0.191827	1.28097	3.16075	0.405275	0.685275	NA
Dppa1	ENSMUSG00000064010.12	0.191827	1.28097	3.16075	0.405275	0.685275	NA
Elovl3	ENSMUSG00000038754.4	0.208771	1.28097	3.16075	0.405275	0.685275	NA
Fcrlb	ENSMUSG00000070524.1	0.191827	1.28097	3.16075	0.405275	0.685275	NA
Fut7	ENSMUSG00000036587.13	0.191827	1.28097	3.16075	0.405275	0.685275	NA
[truncated: 18,753 more rows]

## Sheet: Significant downregulated LAB
DESeq2 mm10 intron count Labour vs. D15 RNA-seq (n=5)
Significantly downregulated genes in LAB vs D15 (log2FC >= 2, padj < 0.01)
gene_name	gene_id	baseMean	log2FoldChange	lfcSE	stat	pvalue	padj
Shisal1	ENSMUSG00000062760.10	89.0939	-8.70681	0.981709	-8.86903	7.37843e-19	4.59048e-17
Nptx1	ENSMUSG00000025582.4	32.5253	-8.41083	1.07951	-7.79136	6.62912e-15	2.62055e-13
Acta1	ENSMUSG00000031972.5	30.9591	-7.75518	0.994657	-7.79685	6.3474e-15	2.51993e-13
Car4	ENSMUSG00000000805.18	125.41	-7.43299	0.729491	-10.1893	2.21385e-24	2.33209e-22
9230110F11Rik	ENSMUSG00000110497.1	16.1056	-7.39942	1.06245	-6.96447	3.29653e-12	8.94842e-11
Plcz1	ENSMUSG00000030230.15	45.8526	-7.17753	0.944144	-7.60215	2.91248e-14	1.07779e-12
C7	ENSMUSG00000079105.4	327.429	-6.84392	0.403396	-16.9657	1.47232e-64	1.94977e-61
Edn3	ENSMUSG00000027524.9	10.8839	-6.83088	1.12599	-6.06657	1.30672e-09	2.32278e-08
Kif12	ENSMUSG00000028357.13	10.5735	-6.79064	1.5084	-4.50188	6.73544e-06	5.79467e-05
Gm26588	ENSMUSG00000097730.3	10.331	-6.75446	1.15	-5.87344	4.26841e-09	6.92963e-08
Fam19a1	ENSMUSG00000059187.12	94.9712	-6.49837	0.554394	-11.7216	9.88343e-32	1.90874e-29
Slc46a2	ENSMUSG00000028386.1	12.7111	-6.46929	1.14346	-5.65763	1.5348e-08	2.28007e-07
Minar1	ENSMUSG00000039313.14	12.1763	-6.40713	1.07974	-5.93395	2.95732e-09	4.90856e-08
Tac2	ENSMUSG00000025400.11	7.97883	-6.38821	1.15156	-5.54744	2.89879e-08	4.06225e-07
Dnah9	ENSMUSG00000056752.16	16.8818	-6.28926	1.01412	-6.20172	5.585e-10	1.04486e-08
Gm16150	ENSMUSG00000085391.1	7.41751	-6.27785	1.16377	-5.39441	6.87499e-08	9.00157e-07
Hnf1aos1	ENSMUSG00000086054.2	6.98933	-6.19611	1.13935	-5.43828	5.37977e-08	7.1756e-07
Slc13a1	ENSMUSG00000029700.11	9.60402	-6.05843	1.45869	-4.15335	3.27642e-05	0.000238589
Kcnt1	ENSMUSG00000058740.14	6.26411	-6.03294	1.45476	-4.14702	3.36824e-05	0.000244412
Susd5	ENSMUSG00000086596.2	13.8462	-6.00403	0.99586	-6.02899	1.64989e-09	2.89121e-08
Tmem61	ENSMUSG00000085933.2	5.85053	-5.93615	1.0534	-5.63524	1.74818e-08	2.57648e-07
Gm37679	ENSMUSG00000103971.1	5.72669	-5.89608	1.05394	-5.59431	2.21502e-08	3.19086e-07
Prss28	ENSMUSG00000024171.5	5.34845	-5.80729	1.15495	-5.02818	4.95147e-07	5.46431e-06
Gm34240	ENSMUSG00000104336.1	11.9575	-5.79148	1.17825	-4.91533	8.86345e-07	9.24231e-06
Slc17a1	ENSMUSG00000021335.13	5.17865	-5.76142	1.56297	-3.68619	0.000227633	0.00134749
Hecw1	ENSMUSG00000021301.9	4.71128	-5.62398	1.53427	-3.66558	0.000246778	0.00144925
Akr1b7	ENSMUSG00000052131.7	78.2882	-5.61989	0.638277	-8.80479	1.31103e-18	7.84082e-17
Slc28a1	ENSMUSG00000025726.11	4.67318	-5.61823	1.2816	-4.38376	1.16647e-05	9.44386e-05
Prss29	ENSMUSG00000034039.8	4.68007	-5.61567	1.16252	-4.83061	1.36115e-06	1.35676e-05
Gm11762	ENSMUSG00000087675.1	4.54801	-5.57583	1.15134	-4.84292	1.27942e-06	1.28358e-05
4930404H11Rik	ENSMUSG00000113630.1	10.3098	-5.57151	1.00726	-5.53134	3.17802e-08	4.4005e-07
Spats1	ENSMUSG00000023935.10	6.88114	-5.56597	1.05688	-5.26643	1.39104e-07	1.72277e-06
Prom2	ENSMUSG00000027376.15	4.34901	-5.51448	1.2368	-4.45866	8.24754e-06	6.93153e-05
Havcr1	ENSMUSG00000040405.13	535.348	-5.5034	0.919608	-5.9845	2.17049e-09	3.69862e-08
Brinp2	ENSMUSG00000004031.13	181.463	-5.45413	0.806304	-6.76436	1.33898e-11	3.27934e-10
Gm13026	ENSMUSG00000085047.1	4.10234	-5.42393	1.43255	-3.7862	0.000152969	0.000944093
Kcng1	ENSMUSG00000074575.4	22.1069	-5.37408	0.75101	-7.1558	8.31842e-13	2.49076e-11
Elovl2	ENSMUSG00000021364.16	24.5061	-5.28119	1.08784	-4.85476	1.20534e-06	1.21981e-05
Cr2	ENSMUSG00000026616.15	3.55551	-5.21782	1.28281	-4.0675	4.75209e-05	0.000330348
Nudt12os	ENSMUSG00000086594.2	3.539	-5.21541	1.11693	-4.66942	3.02047e-06	2.83255e-05
Slc17a4	ENSMUSG00000021336.17	296.503	-5.19478	0.894576	-5.80698	6.36105e-09	1.01318e-07
AC154507.3	ENSMUSG00000116851.1	5.18233	-5.15775	1.07064	-4.81743	1.45421e-06	1.44331e-05
Gm26562	ENSMUSG00000097621.1	3.20582	-5.06766	1.23801	-4.09338	4.25128e-05	0.000300008
Akp-ps1	ENSMUSG00000101940.2	7.30728	-5.06318	1.04371	-4.85114	1.22755e-06	1.23689e-05
Hapln1	ENSMUSG00000021613.9	3.16898	-5.05182	1.56681	-3.22427	0.00126294	0.00602637
Ces2e	ENSMUSG00000031886.14	3.11531	-5.02658	1.23631	-4.06581	4.78663e-05	0.00033225
Nwd2	ENSMUSG00000090061.9	3.05643	-5.00392	1.19849	-4.17519	2.97744e-05	0.000218881
Gm15286	ENSMUSG00000086649.1	3.07571	-5.00079	1.47938	-3.38034	0.000723968	0.00370784
Gm6213	ENSMUSG00000109827.1	13.2271	-4.94127	0.805852	-6.13174	8.69248e-10	1.58309e-08
Krtdap	ENSMUSG00000074199.7	2.9149	-4.92116	1.47754	-3.33065	0.000866426	0.0043509
Cyp2c23	ENSMUSG00000025197.9	2.78729	-4.86741	1.4935	-3.25907	0.00111779	0.00542936
Gm12002	ENSMUSG00000086584.8	101.516	-4.85934	0.453768	-10.7089	9.24806e-27	1.24246e-24
Slc22a12	ENSMUSG00000061742.11	2.77243	-4.85501	1.20183	-4.0397	5.35201e-05	0.000368187
AU017674	ENSMUSG00000113573.1	4.21521	-4.84696	1.0649	-4.55155	5.32525e-06	4.71402e-05
Trpm8	ENSMUSG00000036251.16	6.29612	-4.84353	1.08053	-4.48256	7.37532e-06	6.28683e-05
Glt8d2	ENSMUSG00000020251.13	15.2516	-4.81648	0.73783	-6.5279	6.6697e-11	1.44966e-09
Cyp3a57	ENSMUSG00000070419.11	11.8431	-4.76867	0.904583	-5.27167	1.35186e-07	1.67761e-06
Fbxo40	ENSMUSG00000047746.14	5.98934	-4.75431	1.02293	-4.64772	3.35621e-06	3.11121e-05
Gm38839	ENSMUSG00000107419.1	2.46987	-4.7011	1.24148	-3.78668	0.000152673	0.000942577
Gm40999	ENSMUSG00000114038.1	3.82151	-4.69983	1.12236	-4.18747	2.82087e-05	0.000208279
Calcb	ENSMUSG00000030666.11	5.71719	-4.68148	1.0792	-4.33792	1.43835e-05	0.000113573
Gm40576	ENSMUSG00000113193.1	16.6035	-4.67933	0.676325	-6.91877	4.55589e-12	1.21534e-10
Gm47705	ENSMUSG00000114033.1	3.67751	-4.65924	1.12172	-4.15367	3.27178e-05	0.000238533
Magix	ENSMUSG00000031147.8	2.3109	-4.59027	1.27188	-3.60906	0.000307312	0.00175526
Cd209a	ENSMUSG00000031494.7	10.4153	-4.57406	0.944587	-4.84239	1.28287e-06	1.28634e-05
Faim2	ENSMUSG00000023011.8	27.8757	-4.57327	0.81155	-5.63523	1.74822e-08	2.57648e-07
Gm34667	ENSMUSG00000113063.1	12.824	-4.54489	0.836481	-5.43335	5.53071e-08	7.35576e-07
Matn4	ENSMUSG00000016995.17	3.3637	-4.52366	1.24118	-3.64465	0.000267753	0.00155714
Adarb2	ENSMUSG00000052551.16	8249.31	-4.51747	0.414634	-10.8951	1.21661e-27	1.73507e-25
Gm16152	ENSMUSG00000087131.7	2.18919	-4.51607	1.4109	-3.20084	0.00137028	0.00647098
1500015O10Rik	ENSMUSG00000026051.8	2.18827	-4.51475	1.22214	-3.69414	0.00022063	0.00130853
Gm35501	ENSMUSG00000111068.1	4.98226	-4.4938	1.37335	-3.27214	0.00106738	0.00522143
Tktl1	ENSMUSG00000031397.11	2.12253	-4.47698	1.45951	-3.06745	0.00215895	0.00955576
Zfp663	ENSMUSG00000056824.15	2.06054	-4.43215	1.2785	-3.46668	0.000526922	0.0028145
Lrrtm3	ENSMUSG00000042846.8	3.15608	-4.42744	1.12122	-3.94877	7.85527e-05	0.000519204
Ckm	ENSMUSG00000030399.2	11.8115	-4.42492	0.793263	-5.57812	2.43127e-08	3.46737e-07
A930003A15Rik	ENSMUSG00000075330.4	2.03257	-4.41852	1.23515	-3.57731	0.000347152	0.00194918
Cbs	ENSMUSG00000024039.14	14.0809	-4.41592	0.716407	-6.16398	7.09398e-10	1.30868e-08
Calml3	ENSMUSG00000063130.4	3.08946	-4.37779	1.1702	-3.74106	0.000183246	0.00110772
Nlgn3	ENSMUSG00000031302.16	3.03618	-4.36501	1.41995	-3.07407	0.00211163	0.0093704
Gm33696	ENSMUSG00000116324.1	11.2477	-4.36298	0.780708	-5.58849	2.29049e-08	3.28173e-07
Mchr1	ENSMUSG00000050164.11	1.9381	-4.34944	1.27353	-3.41526	0.000637221	0.00331856
Ppp1r42	ENSMUSG00000025916.10	15.2332	-4.3236	0.826549	-5.2309	1.68687e-07	2.0589e-06
A630075F10Rik	ENSMUSG00000097065.1	1.89821	-4.30979	1.23183	-3.49869	0.000467554	0.0025302
Smim5	ENSMUSG00000048442.15	23.6607	-4.26109	1.11534	-3.82044	0.000133215	0.000836705
Tctex1d1	ENSMUSG00000028523.14	2.84858	-4.25888	1.25439	-3.39517	0.000685851	0.00353553
Alk	ENSMUSG00000055471.7	6.12122	-4.20834	1.02533	-4.10438	4.05397e-05	0.000288192
Ccdc187	ENSMUSG00000048038.8	32.7455	-4.1985	0.812688	-5.16619	2.3891e-07	2.81589e-06
6030498E09Rik	ENSMUSG00000051361.7	1.74866	-4.18274	1.2703	-3.29272	0.000992245	0.00489652
Acnat1	ENSMUSG00000070985.3	14.0857	-4.1808	1.01165	-4.13266	3.58592e-05	0.000258086
Gm7298	ENSMUSG00000108022.1	1.74288	-4.18016	1.27999	-3.26577	0.00109167	0.00532338
Frmpd1	ENSMUSG00000035615.12	272.258	-4.17624	0.300443	-13.9003	6.31039e-44	2.85353e-41
Gm15958	ENSMUSG00000085055.1	37.4763	-4.16786	0.396351	-10.5156	7.32411e-26	9.11335e-24
BC051019	ENSMUSG00000031022.15	23.5234	-4.16641	0.698546	-5.9644	2.45529e-09	4.13076e-08
Il13ra2	ENSMUSG00000031289.10	7.87659	-4.16362	0.86827	-4.79531	1.62427e-06	1.59586e-05
Gm28154	ENSMUSG00000100053.1	1.70922	-4.15821	1.25887	-3.30312	0.000956169	0.00474501
Gm13187	ENSMUSG00000087355.7	9.73885	-4.15223	0.774086	-5.36405	8.13779e-08	1.05728e-06
Aqp8	ENSMUSG00000030762.11	232.949	-4.1479	0.421371	-9.8438	7.29004e-23	6.93115e-21
Gm29687	ENSMUSG00000113550.1	5.90338	-4.147	1.01675	-4.07868	4.52923e-05	0.000316877
Wfikkn2	ENSMUSG00000044177.4	7.73827	-4.13934	0.853028	-4.85253	1.21898e-06	1.23026e-05
B430212C06Rik	ENSMUSG00000046415.11	3.98361	-4.13667	1.14857	-3.60159	0.000316273	0.00179947
Ptn	ENSMUSG00000029838.11	2594.55	-4.1315	0.390998	-10.5665	4.25911e-26	5.44579e-24
Dupd1	ENSMUSG00000063821.6	1.65561	-4.12323	1.33069	-3.09856	0.00194465	0.00874668
Arl4d	ENSMUSG00000034936.2	19.2112	-4.11285	0.637496	-6.45157	1.107e-10	2.3296e-09
Alb	ENSMUSG00000029368.10	108.345	-4.11059	0.445954	-9.21753	3.04013e-20	2.20172e-18
Spta1	ENSMUSG00000026532.7	7.61527	-4.09935	1.0462	-3.91834	8.91597e-05	0.000580211
Gm12296	ENSMUSG00000084967.1	18.8843	-4.09802	0.569992	-7.18961	6.49744e-13	1.97804e-11
4933406B17Rik	ENSMUSG00000110427.1	26.1727	-4.07878	0.738611	-5.52224	3.34713e-08	4.60886e-07
Slc26a10	ENSMUSG00000040441.10	13.1563	-4.04265	0.91829	-4.40236	1.07077e-05	8.72115e-05
Gm44737	ENSMUSG00000108311.1	18.1169	-4.02787	0.549809	-7.32593	2.37249e-13	7.77136e-12
Gdf10	ENSMUSG00000021943.7	12.4934	-4.01949	0.62597	-6.42122	1.35189e-10	2.79732e-09
Hif3a	ENSMUSG00000004328.15	446.267	-4.00526	0.197292	-20.3012	1.2553e-91	7.75773e-88
L3mbtl4	ENSMUSG00000041565.17	2923.16	-3.98316	0.295098	-13.4977	1.61282e-41	6.50039e-39
Gm5087	ENSMUSG00000051729.12	1.50572	-3.97916	1.28838	-3.08849	0.00201176	0.00899614
Gm49303	ENSMUSG00000114989.1	2.30976	-3.96269	1.23071	-3.21984	0.00128264	0.00610793
Aqp5	ENSMUSG00000044217.17	257.461	-3.93967	0.392002	-10.0501	9.17516e-24	9.3982e-22
Col13a1	ENSMUSG00000058806.14	140.917	-3.93282	0.570436	-6.89441	5.40884e-12	1.42545e-10
Miat	ENSMUSG00000097767.8	55.7955	-3.93277	0.565694	-6.95212	3.5984e-12	9.73931e-11
Lamc3	ENSMUSG00000026840.14	3.424	-3.92303	1.11116	-3.53056	0.000414679	0.00227932
Gm14809	ENSMUSG00000085053.1	3.39965	-3.91547	1.17641	-3.32832	0.000873715	0.00438102
Cyp11b1	ENSMUSG00000075604.5	2.22464	-3.88971	1.23932	-3.13858	0.00169769	0.00778897
Tdo2	ENSMUSG00000028011.16	121.147	-3.88515	0.376879	-10.3088	6.43254e-25	7.22783e-23
Lin7b	ENSMUSG00000003872.9	21.6142	-3.79299	0.536216	-7.07362	1.50941e-12	4.33197e-11
Atp2b3	ENSMUSG00000031376.15	6.0964	-3.79148	0.906821	-4.18107	2.90143e-05	0.000213717
Vat1l	ENSMUSG00000046844.6	12.3977	-3.78258	0.727069	-5.2025	1.96622e-07	2.37175e-06
Kcne2	ENSMUSG00000039672.12	99.5355	-3.76108	0.566775	-6.63592	3.2249e-11	7.38144e-10
Fam13a	ENSMUSG00000037709.13	10710	-3.74054	0.43296	-8.63947	5.64754e-18	3.09779e-16
AC140300.3	ENSMUSG00000116813.1	4.44621	-3.72462	1.02733	-3.62552	0.000288381	0.00165991
Gm49490	ENSMUSG00000116307.1	8.82431	-3.69434	0.767038	-4.81636	1.46198e-06	1.44947e-05
Aldh1a7	ENSMUSG00000024747.3	4.28351	-3.66703	1.12028	-3.27333	0.00106287	0.00520211
Nme8	ENSMUSG00000041138.16	5.33546	-3.62492	1.18721	-3.05332	0.00226326	0.00993948
Raver2	ENSMUSG00000035275.14	848.032	-3.61143	0.163949	-22.0277	1.56249e-107	1.44843e-103
Atp1a2	ENSMUSG00000007097.14	106.645	-3.58631	0.367333	-9.76312	1.62095e-22	1.48774e-20
Rab3c	ENSMUSG00000021700.10	19.224	-3.58219	0.842182	-4.25347	2.10486e-05	0.000159673
A930017M01Rik	ENSMUSG00000060530.2	62.7687	-3.5712	0.391386	-9.12448	7.20841e-20	5.02421e-18
Gm10283	ENSMUSG00000070023.5	21.3188	-3.55368	0.796986	-4.4589	8.23804e-06	6.92982e-05
Galnt5	ENSMUSG00000026828.11	39.8058	-3.5486	0.528331	-6.71663	1.85981e-11	4.41496e-10
Fat3	ENSMUSG00000074505.5	3073.03	-3.54102	0.244234	-14.4985	1.23839e-47	6.75288e-45
Gm12022	ENSMUSG00000085675.1	27.3016	-3.52479	0.442429	-7.96691	1.62691e-15	6.85521e-14
Gm13832	ENSMUSG00000087292.1	49.1354	-3.51574	0.314654	-11.1734	5.50596e-29	8.43641e-27
0610031O16Rik	ENSMUSG00000099146.7	56.0071	-3.4662	0.614395	-5.64165	1.68429e-08	2.48819e-07
Capn6	ENSMUSG00000067276.5	12.4316	-3.45691	0.599132	-5.76986	7.93353e-09	1.24229e-07
4930555F03Rik	ENSMUSG00000031559.15	12.4134	-3.44559	0.82666	-4.16808	3.0717e-05	0.000225452
Vwce	ENSMUSG00000043789.7	37.9429	-3.42371	0.327713	-10.4473	1.50788e-25	1.78064e-23
Nell1	ENSMUSG00000055409.14	381.366	-3.41469	0.552394	-6.18162	6.3446e-10	1.17983e-08
Tenm2	ENSMUSG00000049336.16	1547.31	-3.39769	0.363265	-9.3532	8.50347e-21	6.48783e-19
Gm26721	ENSMUSG00000096943.1	4.84248	-3.39257	0.941462	-3.60351	0.000313949	0.00178876
Wfdc1	ENSMUSG00000023336.6	15.1226	-3.38292	0.568342	-5.95227	2.64449e-09	4.43299e-08
1700006J14Rik	ENSMUSG00000034764.15	9.45513	-3.38237	0.707935	-4.7778	1.77226e-06	1.72935e-05
Unc13c	ENSMUSG00000062151.13	55.5247	-3.36012	0.350729	-9.5804	9.66733e-22	8.18413e-20
A730049H05Rik	ENSMUSG00000048636.7	288.192	-3.34196	0.189579	-17.6283	1.49291e-69	2.51623e-66
Kcnd2	ENSMUSG00000060882.5	3822.79	-3.33492	0.380333	-8.76842	1.81189e-18	1.0597e-16
Slc13a2	ENSMUSG00000001095.5	48.2538	-3.30336	0.656136	-5.03456	4.78941e-07	5.3044e-06
Gm33680	ENSMUSG00000112054.1	10.1346	-3.29908	0.606796	-5.43689	5.42178e-08	7.22125e-07
Gm10046	ENSMUSG00000109143.1	3.33574	-3.26897	1.04517	-3.1277	0.00176182	0.00804734
C530050E15Rik	ENSMUSG00000097838.1	5.50106	-3.26056	0.84141	-3.87512	0.000106574	0.000681102
S100a7a	ENSMUSG00000063767.4	3.19012	-3.22027	1.03022	-3.12582	0.00177307	0.00808877
Gm3331	ENSMUSG00000099148.1	3.26469	-3.21668	1.0512	-3.06001	0.00221333	0.00975632
Pi15	ENSMUSG00000067780.3	1546.41	-3.18285	0.310693	-10.2444	1.25444e-24	1.35217e-22
D630045J12Rik	ENSMUSG00000063455.16	2249.5	-3.16012	0.250712	-12.6046	1.99212e-36	5.77091e-34
2010009K17Rik	ENSMUSG00000100860.1	45.6027	-3.15667	0.301449	-10.4716	1.16599e-25	1.39468e-23
6530403H02Rik	ENSMUSG00000098097.7	205.245	-3.15354	0.339442	-9.29036	1.53761e-20	1.14487e-18
Kcnab3	ENSMUSG00000018470.8	4.09611	-3.1529	0.998812	-3.15665	0.00159592	0.00737312
Bche	ENSMUSG00000027792.11	37.2452	-3.14565	0.555058	-5.66725	1.45107e-08	2.16088e-07
Gata4	ENSMUSG00000021944.15	7.19507	-3.1319	1.00529	-3.11544	0.00183674	0.00833206
Zbtb16	ENSMUSG00000066687.5	11696.6	-3.12009	0.218796	-14.2603	3.86926e-46	1.93881e-43
Esm1	ENSMUSG00000042379.8	10.1105	-3.11442	0.718242	-4.33617	1.44984e-05	0.000114383
Gpr83	ENSMUSG00000031932.14	34.2839	-3.0895	0.391792	-7.88555	3.13165e-15	1.27606e-13
Gm32569	ENSMUSG00000103659.1	31.0803	-3.08886	0.484008	-6.38184	1.74971e-10	3.53758e-09
Sybu	ENSMUSG00000022340.15	3325.07	-3.08544	0.261868	-11.7824	4.80873e-32	9.79712e-30
Gria4	ENSMUSG00000025892.16	766.363	-3.08502	0.313738	-9.8331	8.10807e-23	7.66958e-21
AC110241.2	ENSMUSG00000116885.1	4.98273	-3.08487	0.833228	-3.70231	0.000213647	0.001272
Hs3st6	ENSMUSG00000039628.9	7.95462	-3.0813	0.754747	-4.08256	4.45426e-05	0.00031222
E130006D01Rik	ENSMUSG00000085271.7	41.6331	-3.07392	0.536818	-5.72619	1.02708e-08	1.56984e-07
4930532I03Rik	ENSMUSG00000112201.1	7.82648	-3.07113	0.714182	-4.3002	1.70642e-05	0.000132151
Gm12811	ENSMUSG00000087641.1	4.96	-3.0707	0.83666	-3.67019	0.000242369	0.00142651
Pln	ENSMUSG00000038583.13	9.89184	-3.05955	0.881238	-3.47187	0.000516844	0.00276625
Prkg2	ENSMUSG00000029334.14	468.64	-3.05137	0.28774	-10.6046	2.83647e-26	3.65196e-24
Cd209c	ENSMUSG00000040165.14	17.5113	-3.02896	0.759498	-3.98811	6.66028e-05	0.00044886
Proc	ENSMUSG00000024386.9	32.6136	-3.02371	0.624931	-4.83847	1.30845e-06	1.31057e-05
Unc80	ENSMUSG00000055567.18	5.75042	-3.01789	0.793322	-3.80411	0.000142312	0.000885987
Gm765	ENSMUSG00000090667.2	3.78644	-3.00173	0.948333	-3.16527	0.00154939	0.007194
Lynx1	ENSMUSG00000022594.14	4.70383	-3.00119	0.861697	-3.48288	0.000496052	0.00266883
AI197445	ENSMUSG00000114780.1	12.1242	-2.98417	0.700704	-4.25882	2.05511e-05	0.000156347
BB123696	ENSMUSG00000113737.1	28.2158	-2.96549	0.399565	-7.4218	1.15542e-13	3.95232e-12
Guca2b	ENSMUSG00000032978.14	78.1997	-2.96134	0.604648	-4.89763	9.70018e-07	1.00106e-05
Gm38407	ENSMUSG00000112792.1	21.9506	-2.95156	0.456006	-6.47263	9.63101e-11	2.04067e-09
Gm45901	ENSMUSG00000108111.1	5.40665	-2.94623	0.788265	-3.73761	0.000185777	0.00112119
Lhcgr	ENSMUSG00000024107.7	14.3856	-2.9364	0.590942	-4.96901	6.72952e-07	7.21604e-06
Tcf23	ENSMUSG00000006642.3	57.4941	-2.93128	0.238958	-12.2669	1.36328e-34	3.32569e-32
Atp7b	ENSMUSG00000006567.11	119.344	-2.93125	0.469415	-6.24446	4.25257e-10	8.11138e-09
Hhip	ENSMUSG00000064325.4	58.5743	-2.92749	0.504232	-5.80584	6.40453e-09	1.01835e-07
Irs3	ENSMUSG00000047182.6	5.32908	-2.91918	0.761947	-3.83121	0.000127513	0.000803568
Gm38409	ENSMUSG00000114744.1	8.15504	-2.91799	0.673646	-4.33164	1.48002e-05	0.000116516
Gria2	ENSMUSG00000033981.14	19.2126	-2.90692	0.862293	-3.37116	0.000748532	0.00381782
Fn3k	ENSMUSG00000025175.12	8.79277	-2.89972	0.684876	-4.23394	2.29635e-05	0.000172786
A530020G20Rik	ENSMUSG00000097124.2	6.12087	-2.89574	0.790021	-3.6654	0.000246955	0.00144983
Degs2	ENSMUSG00000021263.11	223.666	-2.88805	0.428872	-6.73405	1.65004e-11	3.96151e-10
Itih5	ENSMUSG00000025780.7	1957.88	-2.8815	0.269744	-10.6824	1.23111e-26	1.61878e-24
9530059O14Rik	ENSMUSG00000097736.8	2830.91	-2.87407	0.647435	-4.43916	9.03111e-06	7.50501e-05
Usp50	ENSMUSG00000027364.14	59.1304	-2.87283	0.389839	-7.36929	1.71544e-13	5.74082e-12
Them7	ENSMUSG00000055312.2	562.79	-2.85783	0.393409	-7.26427	3.75051e-13	1.19475e-11
Bco1	ENSMUSG00000031845.15	143.894	-2.85472	0.28188	-10.1275	4.17373e-24	4.34724e-22
Astn1	ENSMUSG00000026587.15	264.764	-2.85457	0.149161	-19.1375	1.22977e-81	5.68499e-78
Chst13	ENSMUSG00000056643.5	37.4318	-2.83472	0.430574	-6.58357	4.59286e-11	1.02223e-09
AC159282.1	ENSMUSG00000112404.1	39.3115	-2.825	0.564223	-5.00689	5.53156e-07	6.05402e-06
Rgs2	ENSMUSG00000026360.9	229.435	-2.82139	0.28976	-9.73701	2.09637e-22	1.89594e-20
4930467D21Rik	ENSMUSG00000097516.7	59.5807	-2.82001	0.322468	-8.74509	2.22841e-18	1.29513e-16
Mgat4c	ENSMUSG00000019888.16	303.325	-2.81415	0.481619	-5.84311	5.12361e-09	8.23865e-08
Duoxa1	ENSMUSG00000027224.14	19.1586	-2.80753	0.505558	-5.55333	2.80282e-08	3.94266e-07
Gm14812	ENSMUSG00000073051.4	26.402	-2.79387	0.392933	-7.1103	1.15795e-12	3.38084e-11
Gm9801	ENSMUSG00000045813.7	46.9139	-2.79223	0.344433	-8.10675	5.19913e-16	2.31156e-14
Cox6b2	ENSMUSG00000051811.14	42.3384	-2.79155	0.420126	-6.64455	3.04139e-11	6.99596e-10
Kcna6	ENSMUSG00000038077.7	22.5721	-2.78926	0.596248	-4.67803	2.89645e-06	2.73006e-05
Lmx1a	ENSMUSG00000026686.14	13.0257	-2.78922	0.598795	-4.65806	3.19207e-06	2.97691e-05
Ace2	ENSMUSG00000015405.15	29.1728	-2.78891	0.504546	-5.52755	3.24725e-08	4.4828e-07
Ccbe1	ENSMUSG00000046318.15	5619.05	-2.78368	0.208398	-13.3575	1.07115e-40	4.1111e-38
Spock2	ENSMUSG00000058297.16	129.656	-2.76381	0.316828	-8.72337	2.70031e-18	1.55477e-16
Gamt	ENSMUSG00000020150.13	8.8465	-2.76121	0.848935	-3.25255	0.00114373	0.00554372
Frmpd4	ENSMUSG00000049176.14	1586.72	-2.75837	0.20468	-13.4765	2.15049e-41	8.48301e-39
Kcnq5	ENSMUSG00000028033.16	58996.5	-2.7453	0.300454	-9.13719	6.40981e-20	4.53579e-18
Gm13377	ENSMUSG00000086821.3	12.8601	-2.74016	0.597879	-4.58314	4.58054e-06	4.1285e-05
Smad9	ENSMUSG00000027796.2	13.8751	-2.73998	0.556448	-4.92406	8.47683e-07	8.86909e-06
Gm17029	ENSMUSG00000086740.1	105.846	-2.73747	0.361035	-7.58227	3.39561e-14	1.25158e-12
Gm48500	ENSMUSG00000114566.1	7.84157	-2.68535	0.725981	-3.69893	0.000216513	0.00128659
Aldh1l2	ENSMUSG00000020256.14	500.824	-2.67688	0.212875	-12.5749	2.90144e-36	8.15041e-34
Syt13	ENSMUSG00000027220.2	10.7979	-2.67525	0.624665	-4.28269	1.84649e-05	0.000141873
Myom2	ENSMUSG00000031461.4	19.1694	-2.6704	0.586657	-4.5519	5.31636e-06	4.71153e-05
Gm16263	ENSMUSG00000086709.1	10.6042	-2.66904	0.537692	-4.96388	6.90989e-07	7.38383e-06
Rbp2	ENSMUSG00000032454.9	31.8609	-2.65692	0.584477	-4.5458	5.47274e-06	4.8156e-05
Gm13266	ENSMUSG00000084901.6	46.736	-2.65646	0.525097	-5.05898	4.2151e-07	4.73043e-06
Abi3bp	ENSMUSG00000035258.15	24650.3	-2.65459	0.191528	-13.8601	1.10542e-43	4.87966e-41
Sptb	ENSMUSG00000021061.15	12.624	-2.62904	0.482769	-5.44574	5.15891e-08	6.90587e-07
Rdh12	ENSMUSG00000021123.12	290.777	-2.62528	0.520142	-5.04725	4.48222e-07	4.99101e-06
Col4a6	ENSMUSG00000031273.16	1093.44	-2.61899	0.268454	-9.75584	1.74148e-22	1.59049e-20
F630206G17Rik	ENSMUSG00000086686.1	10.9547	-2.61313	0.580228	-4.50364	6.68001e-06	5.75499e-05
Lrfn2	ENSMUSG00000040490.4	108.063	-2.61248	0.205449	-12.716	4.82072e-37	1.46518e-34
Pcp4	ENSMUSG00000090223.2	312.355	-2.61082	0.39799	-6.56001	5.38027e-11	1.18328e-09
Cyp2s1	ENSMUSG00000040703.11	113.647	-2.60256	0.575919	-4.51898	6.2139e-06	5.39605e-05
Gm30835	ENSMUSG00000105068.1	54.0722	-2.5929	0.315601	-8.21574	2.10852e-16	9.70026e-15
Dio3os	ENSMUSG00000113581.1	172.293	-2.58571	0.177453	-14.5712	4.28165e-48	2.40551e-45
Slc27a6	ENSMUSG00000024600.8	30.3396	-2.58176	0.336365	-7.67548	1.64797e-14	6.26094e-13
Gm12426	ENSMUSG00000087500.1	60.907	-2.5741	0.323334	-7.96111	1.70498e-15	7.16396e-14
Gm30329	ENSMUSG00000110388.1	7.98418	-2.56975	0.637554	-4.03064	5.56254e-05	0.000381537
Tnni2	ENSMUSG00000031097.15	22.8926	-2.56724	0.434688	-5.90594	3.50645e-09	5.73783e-08
A830012C17Rik	ENSMUSG00000085996.1	194.583	-2.56682	0.266059	-9.64756	5.03381e-22	4.40221e-20
Tgfb2	ENSMUSG00000039239.14	23402.3	-2.56632	0.348312	-7.36789	1.73344e-13	5.79061e-12
Gm49445	ENSMUSG00000116493.1	9.36872	-2.55192	0.5893	-4.33042	1.48823e-05	0.000117113
Grid2	ENSMUSG00000071424.10	13.5198	-2.5485	0.668844	-3.8103	0.000138798	0.000867023
Cacng4	ENSMUSG00000020723.3	11.264	-2.54392	0.520952	-4.88322	1.04367e-06	1.07141e-05
Far2	ENSMUSG00000030303.15	17.9889	-2.53401	0.573791	-4.41627	1.0042e-05	8.24168e-05
Gm11816	ENSMUSG00000086233.1	21.0521	-2.52629	0.441079	-5.72752	1.01907e-08	1.56145e-07
Syt6	ENSMUSG00000027849.18	479.883	-2.52162	0.235781	-10.6947	1.07727e-26	1.43687e-24
Gm36287	ENSMUSG00000113587.1	19.4285	-2.52094	0.418255	-6.02729	1.66736e-09	2.91355e-08
Cacna1e	ENSMUSG00000004110.16	1722.77	-2.52001	0.153369	-16.4311	1.14565e-60	1.24943e-57
4833412C05Rik	ENSMUSG00000097697.2	26.3366	-2.51952	0.412571	-6.10689	1.01594e-09	1.83047e-08
Ctcflos	ENSMUSG00000087382.7	16.0509	-2.51039	0.464026	-5.41001	6.30207e-08	8.30422e-07
4930488L21Rik	ENSMUSG00000097520.2	15.4299	-2.51013	0.473031	-5.30648	1.1176e-07	1.41435e-06
Ckb	ENSMUSG00000001270.9	53.1714	-2.48277	0.328311	-7.56226	3.96135e-14	1.44859e-12
Sptbn4	ENSMUSG00000011751.16	18.5244	-2.48266	0.420042	-5.91052	3.41038e-09	5.60039e-08
B230110C06Rik	ENSMUSG00000097547.8	14.2779	-2.48129	0.793611	-3.12658	0.00176854	0.00807206
Tmem200c	ENSMUSG00000095407.2	26.519	-2.48104	0.453489	-5.47099	4.47518e-08	6.02104e-07
Fst	ENSMUSG00000021765.9	457.91	-2.47347	0.246581	-10.031	1.11328e-23	1.13408e-21
Gng8	ENSMUSG00000063594.5	68.7874	-2.47281	0.439321	-5.62872	1.81552e-08	2.65875e-07
Stum	ENSMUSG00000053963.7	333.23	-2.46697	0.232058	-10.6309	2.14137e-26	2.77629e-24
2810468N07Rik	ENSMUSG00000091475.3	8.80894	-2.45829	0.554221	-4.43557	9.18292e-06	7.6141e-05
Kcnip1	ENSMUSG00000053519.15	815.792	-2.45661	0.367396	-6.68655	2.28489e-11	5.32853e-10
Gm6556	ENSMUSG00000097806.3	8.797	-2.44756	0.538006	-4.54931	5.38218e-06	4.75623e-05
Gm28375	ENSMUSG00000099401.1	4.03543	-2.44621	0.793439	-3.08305	0.0020489	0.00913797
Ccdc141	ENSMUSG00000044033.16	19215.3	-2.44127	0.275226	-8.87005	7.3113e-19	4.56402e-17
Nek10	ENSMUSG00000042567.20	915.888	-2.42679	0.302665	-8.01806	1.07428e-15	4.5892e-14
Mest	ENSMUSG00000051855.15	135.531	-2.41751	0.416716	-5.80134	6.57883e-09	1.04249e-07
Scube2	ENSMUSG00000007279.14	964.656	-2.41553	0.233872	-10.3284	5.24011e-25	5.96022e-23
Fgf10	ENSMUSG00000021732.14	134.193	-2.41247	0.405768	-5.94544	2.75719e-09	4.59284e-08
Klhl32	ENSMUSG00000040387.16	4974.43	-2.40799	0.28061	-8.58127	9.38313e-18	5.04241e-16
Rbfox3	ENSMUSG00000025576.17	897.661	-2.40661	0.695131	-3.4621	0.000535987	0.00285224
Nalcn	ENSMUSG00000000197.8	532.457	-2.39223	0.341754	-6.99986	2.56216e-12	7.07166e-11
Cuzd1	ENSMUSG00000040205.8	288.838	-2.39172	0.509404	-4.69513	2.66439e-06	2.52674e-05
Scn1a	ENSMUSG00000064329.13	28.4044	-2.39018	0.750347	-3.18544	0.00144535	0.00676672
4930432M17Rik	ENSMUSG00000074248.7	35.0656	-2.37774	0.597156	-3.98178	6.84015e-05	0.000459813
Gm40578	ENSMUSG00000113029.1	28.0118	-2.36869	0.459767	-5.15194	2.57802e-07	3.01555e-06
Cgref1	ENSMUSG00000029161.7	37.0082	-2.36744	0.305388	-7.75224	9.02864e-15	3.51733e-13
Xpnpep2	ENSMUSG00000037005.16	16.5187	-2.36501	0.768243	-3.07847	0.00208067	0.00925518
Frmd7	ENSMUSG00000036131.12	35.5406	-2.35817	0.379743	-6.20989	5.30209e-10	9.94947e-09
CT573017.1	ENSMUSG00000117004.1	32.629	-2.35608	0.300201	-7.84836	4.21522e-15	1.69156e-13
Gm16070	ENSMUSG00000085125.7	25.6031	-2.35482	0.396343	-5.94137	2.82641e-09	4.6997e-08
Kank4	ENSMUSG00000035407.8	66.6351	-2.3538	0.335369	-7.01855	2.24188e-12	6.25972e-11
Rec114	ENSMUSG00000074269.10	10.0075	-2.34876	0.742493	-3.16334	0.00155968	0.00723275
2610027K06Rik	ENSMUSG00000087013.7	45.489	-2.34641	0.306486	-7.65584	1.92056e-14	7.22256e-13
Col11a1	ENSMUSG00000027966.20	3786.39	-2.34357	0.228209	-10.2694	9.67824e-25	1.07446e-22
Gm43568	ENSMUSG00000106365.1	6.15447	-2.33996	0.76509	-3.05841	0.00222515	0.00979679
Opcml	ENSMUSG00000062257.13	536.529	-2.33755	0.286088	-8.17074	3.06502e-16	1.37926e-14
Crispld1	ENSMUSG00000025776.13	229.346	-2.33723	0.213741	-10.9349	7.85201e-28	1.13731e-25
1700019D03Rik	ENSMUSG00000043629.12	101.905	-2.33701	0.314231	-7.43722	1.02828e-13	3.54354e-12
Fgf7	ENSMUSG00000027208.14	1234.92	-2.33491	0.238004	-9.81039	1.01572e-22	9.46304e-21
Lgi4	ENSMUSG00000036560.14	7.55783	-2.33374	0.618061	-3.77591	0.000159427	0.000979706
Dscaml1	ENSMUSG00000032087.10	16.623	-2.3294	0.647097	-3.59976	0.000318507	0.00180972
Hs3st4	ENSMUSG00000078591.1	90.0524	-2.3226	0.36201	-6.41585	1.40038e-10	2.87838e-09
Fam227b	ENSMUSG00000027209.17	187.162	-2.31837	0.360862	-6.42452	1.32285e-10	2.7403e-09
Sgca	ENSMUSG00000001508.15	12.0901	-2.31821	0.714544	-3.24432	0.00117731	0.0056773
Tbx4	ENSMUSG00000000094.12	10.5288	-2.31595	0.601163	-3.85245	0.000116942	0.000741737
Tmem169	ENSMUSG00000026188.11	6.91183	-2.29984	0.721792	-3.18628	0.00144113	0.00675051
Plin4	ENSMUSG00000002831.13	84.303	-2.28309	0.2943	-7.75771	8.64776e-15	3.38248e-13
Lrrn2	ENSMUSG00000026443.3	340.096	-2.28231	0.222541	-10.2557	1.11588e-24	1.22416e-22
Mmp17	ENSMUSG00000029436.9	152.971	-2.27697	0.190303	-11.965	5.41971e-33	1.21062e-30
Gm32834	ENSMUSG00000112959.1	14.893	-2.26847	0.597684	-3.79544	0.000147381	0.000914168
Nkain4	ENSMUSG00000027574.15	71.333	-2.26661	0.577287	-3.92631	8.62575e-05	0.000564096
Cers1	ENSMUSG00000087408.10	10.2507	-2.26381	0.588798	-3.8448	0.00012065	0.000762515
Lrat	ENSMUSG00000028003.6	15.3011	-2.25853	0.648277	-3.48389	0.000494178	0.00265952
Unc5c	ENSMUSG00000059921.15	364.385	-2.25622	0.2733	-8.25548	1.51298e-16	7.15576e-15
Gap43	ENSMUSG00000047261.9	97.6374	-2.25615	0.273324	-8.25447	1.52572e-16	7.19769e-15
Hydin	ENSMUSG00000059854.8	22.8144	-2.24889	0.373282	-6.02466	1.69471e-09	2.95577e-08
Efcab1	ENSMUSG00000068617.5	69.7799	-2.23873	0.293045	-7.63954	2.17998e-14	8.11584e-13
Jhy	ENSMUSG00000032023.7	26.6983	-2.23835	0.596289	-3.7538	0.000174177	0.00106085
Abcb4	ENSMUSG00000042476.12	18.9856	-2.22306	0.471826	-4.71161	2.45767e-06	2.35479e-05
Aldh1b1	ENSMUSG00000035561.5	11.6449	-2.22141	0.585938	-3.7912	0.000149922	0.000927135
Slc24a2	ENSMUSG00000037996.17	66.1462	-2.21705	0.515161	-4.3036	1.68045e-05	0.000130632
Lrrc3b	ENSMUSG00000045201.6	349.316	-2.21162	0.251986	-8.77678	1.68223e-18	9.86981e-17
Plcxd3	ENSMUSG00000049148.8	469.742	-2.21028	0.267086	-8.27553	1.27889e-16	6.09529e-15
Syndig1	ENSMUSG00000074736.10	1722.75	-2.20809	0.334912	-6.59302	4.30958e-11	9.67309e-10
Isyna1	ENSMUSG00000019139.10	258.702	-2.20293	0.431854	-5.10109	3.37704e-07	3.86483e-06
Ppfia2	ENSMUSG00000053825.15	2607.15	-2.1971	0.253759	-8.65823	4.79165e-18	2.65186e-16
Gm15338	ENSMUSG00000085899.1	19.2462	-2.19652	0.39171	-5.60751	2.05254e-08	2.97297e-07
Cys1	ENSMUSG00000062563.15	1034.58	-2.19461	0.402239	-5.45598	4.87035e-08	6.53847e-07
Pnck	ENSMUSG00000002012.13	52.9055	-2.19438	0.272244	-8.06034	7.6082e-16	3.30342e-14
Lonrf2	ENSMUSG00000048814.10	55.5132	-2.19144	0.232694	-9.4177	4.61098e-21	3.69286e-19
Clec4b1	ENSMUSG00000030147.12	112.051	-2.19029	0.211529	-10.3546	3.98989e-25	4.59457e-23
Chrdl1	ENSMUSG00000031283.16	1838.52	-2.1848	0.239079	-9.1384	6.33846e-20	4.50249e-18
Gm20619	ENSMUSG00000093482.8	9.23592	-2.17574	0.627872	-3.46526	0.000529728	0.00282461
Igdcc4	ENSMUSG00000032816.15	415.693	-2.173	0.172826	-12.5733	2.9606e-36	8.19246e-34
Igdcc3	ENSMUSG00000032394.6	32.0524	-2.16748	0.531645	-4.07692	4.56362e-05	0.00031868
Dscam	ENSMUSG00000050272.10	257.096	-2.16684	0.264545	-8.19081	2.59484e-16	1.18202e-14
Mpp3	ENSMUSG00000052373.14	237.481	-2.16338	0.304418	-7.10662	1.18919e-12	3.45572e-11
Trarg1	ENSMUSG00000046275.2	5.10983	-2.16255	0.66657	-3.2443	0.00117741	0.0056773
Frem1	ENSMUSG00000059049.14	1481.45	-2.15985	0.274139	-7.87865	3.3093e-15	1.34549e-13
Gm46323	ENSMUSG00000113913.1	12.6367	-2.15883	0.606162	-3.56147	0.000368782	0.00205507
Has2os	ENSMUSG00000086541.8	385.606	-2.15857	0.344821	-6.25998	3.85026e-10	7.43581e-09
Exoc3l2	ENSMUSG00000011263.16	76.8779	-2.15188	0.292952	-7.34552	2.04961e-13	6.78567e-12
Gm20711	ENSMUSG00000093538.2	17.5452	-2.15053	0.585776	-3.67124	0.000241372	0.00142148
Neto1	ENSMUSG00000050321.2	11.9605	-2.14831	0.554225	-3.87623	0.000106087	0.000678223
Gjb1	ENSMUSG00000047797.14	68.5241	-2.1449	0.508662	-4.21676	2.47841e-05	0.000185132
Map7d2	ENSMUSG00000041020.14	133.884	-2.14142	0.467844	-4.5772	4.71231e-06	4.23081e-05
Lama2	ENSMUSG00000019899.16	10523.6	-2.13796	0.214253	-9.97869	1.88948e-23	1.90386e-21
Tslp	ENSMUSG00000024379.4	15.0657	-2.12797	0.680462	-3.12725	0.00176452	0.0080577
Cpz	ENSMUSG00000036596.6	63.5379	-2.11733	0.294619	-7.18668	6.63865e-13	2.01337e-11
Dgki	ENSMUSG00000038665.15	5739.54	-2.11469	0.214446	-9.86116	6.13341e-23	5.86152e-21
Gm44696	ENSMUSG00000107875.1	6.04203	-2.1123	0.64627	-3.26845	0.00108139	0.00527881
Grip2	ENSMUSG00000030098.15	41.7706	-2.1087	0.5206	-4.05051	5.11059e-05	0.000352625
8430426J06Rik	ENSMUSG00000115970.1	48.6962	-2.10842	0.252834	-8.33913	7.4839e-17	3.67068e-15
Trnp1	ENSMUSG00000056596.8	63.0278	-2.10386	0.256351	-8.20694	2.269e-16	1.04127e-14
Dchs2	ENSMUSG00000102692.1	66.8321	-2.10074	0.284918	-7.37315	1.66649e-13	5.58711e-12
Igf1os	ENSMUSG00000058934.8	10.3723	-2.09858	0.499033	-4.20529	2.60751e-05	0.000193683
Agtr1b	ENSMUSG00000054988.9	36.7573	-2.09426	0.413618	-5.06327	4.1212e-07	4.63073e-06
Gm12992	ENSMUSG00000085667.1	19.7349	-2.0771	0.383585	-5.41497	6.13002e-08	8.10053e-07
Gm36211	ENSMUSG00000106426.1	6.54888	-2.06938	0.570494	-3.62734	0.000286352	0.00164977
Pycr1	ENSMUSG00000025140.15	90.6735	-2.06453	0.276483	-7.4671	8.19835e-14	2.8733e-12
Kcnip3	ENSMUSG00000079056.12	733.75	-2.064	0.213152	-9.68325	3.55242e-22	3.16643e-20
Adam23	ENSMUSG00000025964.15	248.566	-2.05677	0.195721	-10.5087	7.87866e-26	9.73803e-24
Lama4	ENSMUSG00000019846.11	19385.8	-2.05297	0.183669	-11.1776	5.24968e-29	8.11075e-27
Col15a1	ENSMUSG00000028339.17	5217.39	-2.05053	0.237682	-8.62718	6.28809e-18	3.43897e-16
Gm34574	ENSMUSG00000112805.1	11.1702	-2.04232	0.520342	-3.92495	8.67478e-05	0.000566903
Syt7	ENSMUSG00000024743.15	104.25	-2.04216	0.317782	-6.4263	1.30745e-10	2.71143e-09
Ism1	ENSMUSG00000074766.10	267.524	-2.0381	0.24802	-8.21748	2.07826e-16	9.5848e-15
Gm49390	ENSMUSG00000114898.1	8.45049	-2.03088	0.571213	-3.55537	0.000377441	0.00209576
Lmntd1	ENSMUSG00000054966.13	22.5556	-2.02656	0.388086	-5.22194	1.77057e-07	2.14833e-06
Prima1	ENSMUSG00000041669.15	174.733	-2.02529	0.254423	-7.96034	1.71565e-15	7.18017e-14
Armh4	ENSMUSG00000036242.15	396.497	-2.01645	0.161803	-12.4623	1.19798e-35	3.21893e-33

## Sheet: Significant upregulated in LAB
DESeq2 mm10 intron count Labour vs. D15 RNA-seq (n=5)
Significantly upregulated genes in LAB vs D15 (log2FC >= 2, padj < 0.01)
gene_name	gene_id	baseMean	log2FoldChange	lfcSE	stat	pvalue	padj
Wnt7a	ENSMUSG00000030093.7	139.566	10.0586	0.981237	10.2509	1.17e-24	1.28e-22
Clec2e	ENSMUSG00000030155.7	90.2517	9.42848	0.93808	10.0508	9.11e-24	9.38e-22
Prss22	ENSMUSG00000045027.7	35.1526	8.65006	0.960683	9.00407	2.17e-19	1.45e-17
Slc16a14	ENSMUSG00000026220.6	676.183	8.61133	0.51208	16.8164	1.85e-63	2.29e-60
Sprr2f	ENSMUSG00000050635.1	33.9038	8.59816	0.994551	8.64528	5.37e-18	2.95e-16
D130009I18Rik	ENSMUSG00000115432.1	2855.42	8.55158	1.49208	5.73131	9.97e-09	1.53e-07
Adgrg7	ENSMUSG00000022755.4	44.0236	8.39352	1.01066	8.30498	9.98e-17	4.82e-15
Gm26877	ENSMUSG00000097373.1	29.2448	8.38062	1.00148	8.36819	5.85e-17	2.89e-15
Muc4	ENSMUSG00000079620.13	1154.81	8.35357	0.869152	9.61118	7.17e-22	6.13e-20
Krt20	ENSMUSG00000035775.2	25.2217	8.17076	1.1276	7.24612	4.29e-13	1.35e-11
Alox12e	ENSMUSG00000018907.10	23.9172	8.09481	1.11701	7.24683	4.27e-13	1.34e-11
Nyap2	ENSMUSG00000054976.14	129.249	8.08678	0.699575	11.5596	6.6e-31	1.18e-28
Gm10415	ENSMUSG00000107623.1	22.0671	7.97389	1.05737	7.54128	4.65e-14	1.68e-12
4930544M13Rik	ENSMUSG00000051758.6	29.7737	7.82722	0.976688	8.01404	1.11e-15	4.73e-14
Acod1	ENSMUSG00000022126.6	81.8716	7.80838	2.49824	3.12555	0.00177474	0.00809437
1700041M19Rik	ENSMUSG00000100857.2	19.2462	7.77861	0.981153	7.92803	2.23e-15	9.19e-14
Trim40	ENSMUSG00000073399.9	17.393	7.63571	1.1158	6.84324	7.74e-12	1.98e-10
Il1f6	ENSMUSG00000026984.4	36.4161	7.53927	1.1285	6.68078	2.38e-11	5.54e-10
Scn9a	ENSMUSG00000075316.11	15.1338	7.43163	1.5046	4.93926	7.84e-07	8.27e-06
Frem3	ENSMUSG00000042353.9	14.9125	7.40814	0.993661	7.4554	8.96e-14	3.12e-12
Ctxn3	ENSMUSG00000069372.3	14.8379	7.40138	1.0248	7.22224	5.11e-13	1.59e-11
Gm29530	ENSMUSG00000102029.1	32.6894	7.378	1.08519	6.7988	1.05e-11	2.65e-10
Prss32	ENSMUSG00000048992.9	12.5984	7.16797	1.26374	5.67201	1.41e-08	2.11e-07
2310007B03Rik	ENSMUSG00000034159.12	12.5241	7.1566	1.10909	6.45268	1.1e-10	2.32e-09
Gm9195	ENSMUSG00000109446.1	12.1724	7.11728	0.963965	7.38334	1.54e-13	5.23e-12
Tbpl2	ENSMUSG00000061809.8	10.8247	6.9482	1.0468	6.63756	3.19e-11	7.31e-10
Kap	ENSMUSG00000032758.4	1534.59	6.93158	0.713441	9.71571	2.58e-22	2.33e-20
Olfm4	ENSMUSG00000022026.7	10.6637	6.93066	1.15707	5.98986	2.1e-09	3.6e-08
Gm49431	ENSMUSG00000116130.1	10.5418	6.91131	1.0649	6.49012	8.58e-11	1.83e-09
Dsg3	ENSMUSG00000056632.8	23.3971	6.89547	1.03487	6.66312	2.68e-11	6.18e-10
Ptprh	ENSMUSG00000035429.13	100.58	6.84159	0.726887	9.41218	4.86e-21	3.87e-19
Gm40477	ENSMUSG00000113940.1	8.88486	6.66515	1.0665	6.24956	4.12e-10	7.88e-09
5330439A09Rik	ENSMUSG00000089708.1	13.3651	6.66288	1.00314	6.64206	3.09e-11	7.1e-10
Ptprn	ENSMUSG00000026204.15	8.33201	6.56707	1.14436	5.73864	9.54e-09	1.47e-07
Trim15	ENSMUSG00000050747.14	160.411	6.53999	1.19531	5.47136	4.47e-08	6.01e-07
Gm45012	ENSMUSG00000109052.1	7.9203	6.50223	1.10545	5.88197	4.05e-09	6.6e-08
Clca1	ENSMUSG00000028255.6	17.5794	6.47432	1.00641	6.43308	1.25e-10	2.6e-09
Gm15600	ENSMUSG00000085969.1	7.73704	6.46173	1.00976	6.39928	1.56e-10	3.17e-09
Clca3b	ENSMUSG00000037033.9	10.9155	6.37513	1.10085	5.79109	6.99e-09	1.1e-07
Gm6325	ENSMUSG00000081778.1	10.9311	6.37392	1.14985	5.54327	2.97e-08	4.15e-07
Gm35019	ENSMUSG00000115326.1	70.34	6.3435	0.542349	11.6964	1.33e-31	2.54e-29
Cxcl2	ENSMUSG00000058427.10	6.80523	6.28154	1.67388	3.75269	0.000175	0.00106519
4930459C07Rik	ENSMUSG00000112762.1	6.65398	6.2509	1.20841	5.17285	2.31e-07	2.73e-06
Il24	ENSMUSG00000026420.16	42.0957	6.20072	0.702149	8.83106	1.04e-18	6.34e-17
Tspan1	ENSMUSG00000028699.9	88.4415	6.18058	0.532816	11.5998	4.13e-31	7.43e-29
Golt1a	ENSMUSG00000103421.1	20.6647	6.1759	0.94058	6.56606	5.17e-11	1.14e-09
Lipm	ENSMUSG00000056078.5	6.3096	6.17164	1.02717	6.0084	1.87e-09	3.25e-08
Gbp2b	ENSMUSG00000040264.10	71.283	6.15962	1.95279	3.15426	0.00160903	0.00742444
Ghrh	ENSMUSG00000027643.9	6.16931	6.13455	1.23791	4.95558	7.21e-07	7.68e-06
Ccnb3	ENSMUSG00000051592.14	37.9441	6.09886	0.953719	6.39481	1.61e-10	3.26e-09
Padi3	ENSMUSG00000025328.9	19.1441	6.02023	0.982563	6.12707	8.95e-10	1.63e-08
Arg1	ENSMUSG00000019987.9	71.1651	5.99763	0.754039	7.954	1.81e-15	7.51e-14
Oog1	ENSMUSG00000096576.2	5.53478	5.98474	1.52686	3.91965	8.87e-05	0.000578
Myo3b	ENSMUSG00000042064.13	1840.23	5.93393	0.194751	30.4694	6.64e-204	1.23e-199
Pnoc	ENSMUSG00000045731.6	5.3674	5.9335	1.38624	4.2803	1.87e-05	0.000143
Entpd8	ENSMUSG00000036813.11	17.9314	5.89976	1.0617	5.55692	2.75e-08	3.88e-07
Gm30806	ENSMUSG00000114697.1	34.0833	5.8922	0.703649	8.37378	5.58e-17	2.77e-15
Lcn2	ENSMUSG00000026822.14	334.754	5.88769	0.726738	8.10154	5.43e-16	2.4e-14
Gm35733	ENSMUSG00000114843.1	5.00665	5.83033	1.14376	5.09752	3.44e-07	3.93e-06
Cyp2d10	ENSMUSG00000094806.2	4.77198	5.76932	1.44641	3.98873	6.64e-05	0.000448
Bcl2l15	ENSMUSG00000044165.12	328.043	5.76805	0.46586	12.3815	3.29e-35	8.72e-33
C430002N11Rik	ENSMUSG00000101581.6	567.565	5.73099	0.468358	12.2364	1.99e-34	4.79e-32
Prl8a6	ENSMUSG00000021345.16	6.91517	5.71135	1.09211	5.22967	1.7e-07	2.07e-06
Taf7l	ENSMUSG00000009596.9	4.48797	5.67753	1.24826	4.54837	5.41e-06	4.77e-05
Rp1l1	ENSMUSG00000046049.7	14.6104	5.65122	0.906975	6.23085	4.64e-10	8.8e-09
Prl2a1	ENSMUSG00000022886.5	4.34856	5.63315	1.5457	3.6444	0.000268	0.00155816
Prl7b1	ENSMUSG00000021347.3	4.25098	5.60422	1.31231	4.27051	1.95e-05	0.000149
Prl2c2	ENSMUSG00000079092.4	4.24413	5.59822	1.43597	3.89856	9.68e-05	0.000625
Syt16	ENSMUSG00000044912.10	648.989	5.58006	0.761348	7.32919	2.32e-13	7.6e-12
1700063K16Rik	ENSMUSG00000102036.1	4.19012	5.57727	1.16857	4.77273	1.82e-06	1.77e-05
Ptgs2	ENSMUSG00000032487.8	36.7534	5.56076	0.612459	9.07939	1.09e-19	7.47e-18
Alox15	ENSMUSG00000018924.6	21.6455	5.47173	0.9293	5.88801	3.91e-09	6.38e-08
Kndc1	ENSMUSG00000066129.15	3.76293	5.43005	1.17308	4.62887	3.68e-06	3.38e-05
Glra2	ENSMUSG00000018589.8	3.77124	5.42441	1.10453	4.91106	9.06e-07	9.41e-06
Gm45924	ENSMUSG00000115620.1	3.72682	5.40432	1.20856	4.4717	7.76e-06	6.57e-05
Mmp7	ENSMUSG00000018623.9	143.366	5.35653	1.07383	4.98827	6.09e-07	6.59e-06
Sult1e1	ENSMUSG00000029272.8	3.59087	5.35047	1.43589	3.72622	0.000194	0.00116887
Gm1965	ENSMUSG00000090254.7	5.32143	5.33055	1.15282	4.62392	3.77e-06	3.45e-05
Ptgdr2	ENSMUSG00000034117.3	11.795	5.32805	0.9859	5.40425	6.51e-08	8.56e-07
BC016579	ENSMUSG00000033187.8	66.04	5.31808	0.405482	13.1155	2.69e-39	9.39e-37
Ifi202b	ENSMUSG00000026535.9	3.45628	5.30591	1.73435	3.05931	0.00221845	0.00977192
Ltf	ENSMUSG00000032496.7	31795.1	5.30588	0.342937	15.4719	5.37e-54	4.53e-51
Gm15866	ENSMUSG00000087290.2	76.2158	5.30494	0.574946	9.22686	2.79e-20	2.03e-18
Pdcd1	ENSMUSG00000026285.7	3.35433	5.26343	1.65108	3.18786	0.00143328	0.00671713
Cntnap3	ENSMUSG00000033063.8	215.392	5.25415	1.03093	5.09653	3.46e-07	3.94e-06
1700016C15Rik	ENSMUSG00000015962.5	3.30982	5.24101	1.09362	4.79237	1.65e-06	1.62e-05
Tmprss11d	ENSMUSG00000061259.11	35.6966	5.20379	0.608932	8.54576	1.28e-17	6.76e-16
Gtsf1	ENSMUSG00000022487.14	3.08895	5.14091	1.42793	3.60025	0.000318	0.00180778
Gper1	ENSMUSG00000053647.4	3.06938	5.1328	1.47718	3.47472	0.000511	0.00274016
Gm7804	ENSMUSG00000103357.1	3.06306	5.1221	1.18541	4.32096	1.55e-05	0.000121
Noxa1	ENSMUSG00000036805.13	20.0063	5.08895	0.814695	6.24645	4.2e-10	8.03e-09
Dio2	ENSMUSG00000007682.6	689.033	5.06584	0.415796	12.1835	3.81e-34	9.05e-32
Il6	ENSMUSG00000025746.11	18.5022	5.06239	1.16457	4.34701	1.38e-05	0.00011
Grpr	ENSMUSG00000031364.2	25.3023	5.02337	0.732829	6.85476	7.14e-12	1.84e-10
Gm40915	ENSMUSG00000114404.1	2.82898	5.00959	1.19067	4.20737	2.58e-05	0.000192
Tmem178	ENSMUSG00000024245.4	67.855	5.00811	0.535991	9.34365	9.31e-21	7.04e-19
AC140413.1	ENSMUSG00000117655.1	2.73257	4.96093	1.50402	3.29846	0.000972	0.00481161
Lipk	ENSMUSG00000024771.7	44.9977	4.95781	0.682645	7.26265	3.8e-13	1.21e-11
Mkrn2os	ENSMUSG00000068011.4	8.95502	4.94634	0.953161	5.18941	2.11e-07	2.53e-06
Tmprss11b	ENSMUSG00000035861.6	2.70202	4.94626	1.19419	4.14193	3.44e-05	0.000249
Malrd1	ENSMUSG00000075520.5	1055.59	4.93129	0.419845	11.7455	7.45e-32	1.45e-29
Egfl6	ENSMUSG00000000402.2	215.279	4.92411	0.343438	14.3377	1.27e-46	6.74e-44
Nppc	ENSMUSG00000026241.5	20.4768	4.90158	0.674556	7.26637	3.69e-13	1.18e-11
Bcas1os2	ENSMUSG00000086999.1	3.99991	4.89473	1.09273	4.47936	7.49e-06	6.36e-05
Clec4e	ENSMUSG00000030142.10	86.7571	4.87014	1.37411	3.54421	0.000394	0.00217612
4930412B13Rik	ENSMUSG00000086221.1	3.90503	4.86156	1.12626	4.31654	1.58e-05	0.000124
Myh2	ENSMUSG00000033196.17	3.8823	4.85033	1.14821	4.22426	2.4e-05	0.00018
AC105304.1	ENSMUSG00000117110.1	2.53536	4.84847	1.18876	4.07859	4.53e-05	0.000317
Gm48053	ENSMUSG00000112837.1	3.79208	4.81564	1.10475	4.35904	1.31e-05	0.000104
Gm2115	ENSMUSG00000097789.2	32.2822	4.78298	0.494705	9.66834	4.11e-22	3.65e-20
Glrp1	ENSMUSG00000062310.7	13.1235	4.77413	0.871805	5.47614	4.35e-08	5.87e-07
Serpina9	ENSMUSG00000058260.2	12.7977	4.74329	0.862548	5.49916	3.82e-08	5.2e-07
Gm6999	ENSMUSG00000097927.2	2.33346	4.74252	1.24633	3.8052	0.000142	0.000882
Trdc	ENSMUSG00000104876.1	3.56343	4.73959	1.1071	4.28107	1.86e-05	0.000143
Mindy4b-ps	ENSMUSG00000101860.4	2.34371	4.73301	1.24982	3.78696	0.000153	0.000942
Thbs1	ENSMUSG00000040152.8	1787.05	4.71803	0.314417	15.0056	6.75e-51	4.81e-48
1700029J03Rik	ENSMUSG00000099968.7	23.834	4.71796	0.661406	7.13323	9.8e-13	2.89e-11
Btbd17	ENSMUSG00000000202.9	18.9143	4.70593	0.795741	5.9139	3.34e-09	5.51e-08
Gm47754	ENSMUSG00000114784.1	321.22	4.69765	0.352788	13.3158	1.87e-40	6.95e-38
Slc12a3	ENSMUSG00000031766.4	3.48267	4.69232	1.15232	4.07205	4.66e-05	0.000325
Gm36426	ENSMUSG00000113796.1	3.46078	4.68492	1.14663	4.08583	4.39e-05	0.000308
E030025P04Rik	ENSMUSG00000078605.2	10.379	4.68465	0.867811	5.39824	6.73e-08	8.82e-07
Zbtb12	ENSMUSG00000049823.9	3.42031	4.68154	1.16252	4.02707	5.65e-05	0.000386
Elf3	ENSMUSG00000003051.13	220.617	4.66641	0.459435	10.1568	3.09e-24	3.24e-22
Galntl5	ENSMUSG00000028938.9	2.19306	4.64395	1.27764	3.63479	0.000278	0.00161135
Speer9-ps1	ENSMUSG00000107956.1	14.9732	4.63964	0.875521	5.29929	1.16e-07	1.47e-06
Tmem54	ENSMUSG00000028786.15	27.0439	4.63141	0.651542	7.10839	1.17e-12	3.42e-11
Bglap3	ENSMUSG00000074489.9	4.91162	4.59809	1.22419	3.75603	0.000173	0.00105177
AI463229	ENSMUSG00000114828.1	30.7957	4.59672	0.636624	7.22046	5.18e-13	1.6e-11
Uox	ENSMUSG00000028186.14	33.7809	4.59281	0.930575	4.93546	8e-07	8.4e-06
Gm15482	ENSMUSG00000086711.1	2.09282	4.57534	1.26897	3.60555	0.000311	0.00177693
H60c	ENSMUSG00000091618.3	55.8892	4.55227	0.541045	8.41386	3.97e-17	2e-15
Gm30083	ENSMUSG00000115726.1	2.04123	4.54747	1.28458	3.54004	0.0004	0.00220551
Gm43821	ENSMUSG00000105219.1	13.5297	4.52221	0.819827	5.51605	3.47e-08	4.75e-07
Hsd17b2	ENSMUSG00000031844.8	152.646	4.5102	0.582666	7.74064	9.89e-15	3.84e-13
Gm49231	ENSMUSG00000115013.1	1.98	4.49683	1.30909	3.43507	0.000592	0.00311315
Il1f9	ENSMUSG00000044103.4	41.5317	4.49131	0.754793	5.95038	2.68e-09	4.47e-08
Gm28040	ENSMUSG00000115958.1	75.1499	4.48728	0.594937	7.54245	4.61e-14	1.67e-12
Gdpd2	ENSMUSG00000019359.14	4.54456	4.48202	1.18013	3.7979	0.000146	0.000906
Apobec2	ENSMUSG00000040694.4	13.4178	4.47302	0.696838	6.41903	1.37e-10	2.83e-09
Tnc	ENSMUSG00000028364.15	18207.7	4.44944	0.296933	14.9847	9.25e-51	6.35e-48
4930578I06Rik	ENSMUSG00000021961.6	2.955	4.44158	1.40468	3.16198	0.00156699	0.00725394
2310069B03Rik	ENSMUSG00000100291.6	6.16689	4.44124	1.40681	3.15696	0.00159423	0.00736714
Itgb6	ENSMUSG00000026971.15	1738.62	4.41719	0.375424	11.7659	5.85e-32	1.15e-29
Ccdc33	ENSMUSG00000037716.15	38.1582	4.41386	0.693834	6.36156	2e-10	4.01e-09
Ddit4	ENSMUSG00000020108.4	2.88123	4.41115	1.13764	3.87745	0.000106	0.000675
Gm43150	ENSMUSG00000106777.1	1.85978	4.40939	1.37888	3.19781	0.00138473	0.00652591
Trpv6	ENSMUSG00000029868.13	1281.82	4.40388	0.295743	14.8909	3.77e-50	2.41e-47
Chil6	ENSMUSG00000027902.8	8.14731	4.39066	0.966884	4.54105	5.6e-06	4.91e-05
Cxcl17	ENSMUSG00000060188.6	223.584	4.37355	0.427566	10.2289	1.47e-24	1.57e-22
LOC102637012	ENSMUSG00000111473.1	1.78693	4.34647	1.34368	3.23476	0.00121746	0.00583548
Wnt7b	ENSMUSG00000022382.15	365.592	4.34553	0.377868	11.5001	1.32e-30	2.28e-28
Gm20663	ENSMUSG00000093378.2	5.84887	4.34448	1.20578	3.60304	0.000315	0.00179094
2610204G07Rik	ENSMUSG00000084860.1	1.77333	4.33749	1.29317	3.35415	0.000796	0.00403595
Gm16133	ENSMUSG00000089854.2	16.1685	4.32895	0.666209	6.49788	8.15e-11	1.75e-09
Gm12897	ENSMUSG00000083949.1	1.75591	4.32666	1.31252	3.29645	0.000979	0.00483828
B930018H19Rik	ENSMUSG00000109819.1	10.0356	4.32141	0.818557	5.27931	1.3e-07	1.62e-06
Gm33677	ENSMUSG00000112778.1	1.73589	4.31357	1.35458	3.18444	0.00145034	0.00678508
5730419F03Rik	ENSMUSG00000099364.1	31.8889	4.29529	0.479964	8.94919	3.58e-19	2.31e-17
Tmem212	ENSMUSG00000043164.3	59.948	4.28115	0.36813	11.6295	2.92e-31	5.36e-29
Clca3a2	ENSMUSG00000028262.13	17.0852	4.27948	0.636378	6.72475	1.76e-11	4.19e-10
Casp14	ENSMUSG00000005355.9	1.69392	4.26573	1.30463	3.26968	0.0010767	0.00526011
Padi1	ENSMUSG00000025329.3	2929.8	4.26547	0.45692	9.33527	1.01e-20	7.59e-19
Trpc5	ENSMUSG00000041710.4	13.5646	4.2346	0.931093	4.54799	5.42e-06	4.77e-05
Krt84	ENSMUSG00000044294.8	2.50662	4.20537	1.19134	3.52996	0.000416	0.00228318
Gm40916	ENSMUSG00000114355.1	5.46057	4.18892	0.955915	4.38211	1.18e-05	9.5e-05
Oxtr	ENSMUSG00000049112.9	457.59	4.18768	0.292414	14.3211	1.62e-46	8.32e-44
Il1f8	ENSMUSG00000026985.1	14.1624	4.18508	0.843862	4.95944	7.07e-07	7.55e-06
Atf7ip2	ENSMUSG00000039200.16	14.3729	4.18121	0.613882	6.81111	9.69e-12	2.44e-10
Gpa33	ENSMUSG00000000544.14	6.94417	4.17365	1.11892	3.73009	0.000191	0.00115257
Prl2c5	ENSMUSG00000055360.13	3.66071	4.14519	1.19591	3.46615	0.000528	0.00281766
Grem2	ENSMUSG00000050069.3	219.659	4.13562	0.222735	18.5674	5.89e-77	1.56e-73
Clu	ENSMUSG00000022037.15	443.061	4.13489	0.348858	11.8527	2.08e-32	4.49e-30
Cntnap5b	ENSMUSG00000067028.11	35.2854	4.12703	0.498998	8.27064	1.33e-16	6.32e-15
Socs3	ENSMUSG00000053113.3	6.65657	4.11012	1.28697	3.19365	0.00140489	0.00659909
Apol7a	ENSMUSG00000010601.14	111.24	4.10797	0.565152	7.26879	3.63e-13	1.16e-11
Fos	ENSMUSG00000021250.13	117.457	4.09036	0.533055	7.67343	1.67e-14	6.34e-13
Tinag	ENSMUSG00000032357.12	223.608	4.08703	0.398831	10.2475	1.21e-24	1.32e-22
Cfi	ENSMUSG00000058952.12	32.028	4.08425	0.454409	8.98806	2.52e-19	1.66e-17
D730001G18Rik	ENSMUSG00000101026.1	3.49246	4.08086	1.20234	3.3941	0.000689	0.00354595
Trank1	ENSMUSG00000062296.8	33.654	4.05591	0.742618	5.46164	4.72e-08	6.34e-07
Gm22000	ENSMUSG00000086932.1	14.9987	4.0458	0.620088	6.52456	6.82e-11	1.48e-09
Plekhg4	ENSMUSG00000014782.16	6.47659	4.03314	1.04336	3.86554	0.000111	0.000706
Gm40918	ENSMUSG00000114732.1	6.3108	4.02486	1.13939	3.53247	0.000412	0.00226491
AA467197	ENSMUSG00000033213.16	68.0179	4.02295	1.1195	3.59353	0.000326	0.00184621
4933402J15Rik	ENSMUSG00000115845.1	6.38495	4.02278	0.93617	4.29706	1.73e-05	0.000134
Gm36377	ENSMUSG00000113909.1	4.80435	4.01331	1.09872	3.65271	0.000259	0.00151714
Togaram2	ENSMUSG00000045761.16	30.5755	3.99299	0.78357	5.09589	3.47e-07	3.96e-06
Gm35363	ENSMUSG00000110301.1	2.18848	3.99074	1.24027	3.21764	0.00129251	0.00615069
Unc5cl	ENSMUSG00000043592.15	1118.22	3.98	0.384431	10.353	4.06e-25	4.64e-23
Fam213a	ENSMUSG00000021792.15	5363.81	3.97919	0.230437	17.268	8.19e-67	1.17e-63
Gm40723	ENSMUSG00000112134.1	3.22762	3.97673	1.14549	3.47164	0.000517	0.00276779
Il1b	ENSMUSG00000027398.13	69.824	3.95563	1.15128	3.43586	0.000591	0.00310498
Mroh3	ENSMUSG00000087230.10	70.5123	3.94371	0.492379	8.0095	1.15e-15	4.9e-14
Itprid1	ENSMUSG00000037973.6	14.2055	3.94079	0.74469	5.29185	1.21e-07	1.52e-06
AL805899.2	ENSMUSG00000117251.1	3.12343	3.89719	1.16149	3.35533	0.000793	0.00401988
Gm36120	ENSMUSG00000111820.1	20.0272	3.88491	1.19787	3.24318	0.00118203	0.00569512
Gm34068	ENSMUSG00000103305.1	13.4968	3.8834	0.922405	4.21008	2.55e-05	0.00019
Gm18857	ENSMUSG00000110055.1	6.13035	3.88091	0.985784	3.93688	8.25e-05	0.000543
Cftr	ENSMUSG00000041301.15	4796.91	3.87949	0.590288	6.5722	4.96e-11	1.1e-09
Kcnrg	ENSMUSG00000046168.9	3.05257	3.87481	1.19564	3.24079	0.00119198	0.00573084
Gm48427	ENSMUSG00000112234.1	8.86583	3.85493	0.864367	4.45983	8.2e-06	6.91e-05
Slc26a4	ENSMUSG00000020651.8	787.663	3.85185	0.442168	8.71129	3e-18	1.72e-16
Dusp4	ENSMUSG00000031530.6	8.67394	3.84826	0.74173	5.18823	2.12e-07	2.54e-06
Naip1	ENSMUSG00000021640.6	1919.3	3.84224	0.673726	5.70297	1.18e-08	1.79e-07
Bpifc	ENSMUSG00000050108.12	17.262	3.81239	0.586683	6.49821	8.13e-11	1.75e-09
Syt8	ENSMUSG00000031098.18	46.8855	3.81155	0.499543	7.63009	2.35e-14	8.72e-13
Grip1os3	ENSMUSG00000085454.1	30.4246	3.80627	0.671487	5.66842	1.44e-08	2.15e-07
Gm11149	ENSMUSG00000079564.3	13.4678	3.80559	0.846031	4.49816	6.85e-06	5.89e-05
Mab21l3	ENSMUSG00000044313.13	252.738	3.78311	0.523914	7.22085	5.17e-13	1.6e-11
Tarm1	ENSMUSG00000053338.9	27.8448	3.78055	0.916718	4.12401	3.72e-05	0.000267
Plekhs1	ENSMUSG00000035818.14	655.311	3.78047	0.256633	14.7311	4.07e-49	2.52e-46
Lncbate1	ENSMUSG00000110613.1	1.86424	3.75318	1.21159	3.09772	0.00195013	0.00876709
Gm12248	ENSMUSG00000086962.4	85.9005	3.75242	0.478205	7.8469	4.26e-15	1.71e-13
AC102496.1	ENSMUSG00000117465.1	389.95	3.7443	0.452275	8.27882	1.24e-16	5.94e-15
Serpinb1c	ENSMUSG00000079049.9	5.45719	3.73967	1.01652	3.6789	0.000234	0.00138438
Scel	ENSMUSG00000022123.9	201.647	3.71227	0.601503	6.17166	6.76e-10	1.25e-08
A630031M04Rik	ENSMUSG00000087470.1	4.02691	3.68895	1.08669	3.39466	0.000687	0.0035397
Adam28	ENSMUSG00000014725.16	292.731	3.68237	0.385872	9.54299	1.39e-21	1.16e-19
Ceacam1	ENSMUSG00000074272.10	4631.35	3.6693	0.198429	18.4918	2.4e-76	5.57e-73
Ubxn10	ENSMUSG00000043621.13	10.4349	3.65321	0.634716	5.75566	8.63e-09	1.34e-07
Slc26a7	ENSMUSG00000040569.13	64.5673	3.62404	0.345602	10.4862	1e-25	1.21e-23
Gm8439	ENSMUSG00000091297.1	72.7947	3.62259	0.399547	9.06676	1.23e-19	8.36e-18
4930556G22Rik	ENSMUSG00000101764.1	46.0151	3.60531	0.565865	6.37132	1.87e-10	3.78e-09
Kiss1	ENSMUSG00000116158.1	4.95349	3.60047	0.993201	3.62511	0.000289	0.00166202
Slc39a4	ENSMUSG00000063354.7	61.8793	3.60012	0.383488	9.38783	6.12e-21	4.77e-19
Lrrc66	ENSMUSG00000067206.3	3.65546	3.58531	1.06222	3.37531	0.000737	0.00376789
Nr6a1os	ENSMUSG00000085201.1	200.105	3.58016	0.365726	9.78917	1.25e-22	1.16e-20
Lemd1	ENSMUSG00000079330.8	24.9517	3.57119	0.920395	3.88006	0.000104	0.000668
Mmp11	ENSMUSG00000000901.17	1049.07	3.56296	0.277278	12.8498	8.63e-38	2.71e-35
Ccdc162	ENSMUSG00000075225.14	1701.22	3.56191	0.472888	7.53226	4.99e-14	1.79e-12
Fpr3	ENSMUSG00000079700.7	81.1893	3.55913	1.09513	3.24997	0.00115418	0.00558409
Atp10b	ENSMUSG00000055415.7	1477.17	3.55468	0.338392	10.5046	8.23e-26	1.01e-23
Csmd2	ENSMUSG00000028804.20	860.852	3.52982	0.365756	9.65075	4.88e-22	4.29e-20
A630023A22Rik	ENSMUSG00000095493.2	239.871	3.5245	0.307071	11.4778	1.71e-30	2.93e-28
Cpvl	ENSMUSG00000052955.5	21.0641	3.50799	0.620789	5.65085	1.6e-08	2.37e-07
Tspo2	ENSMUSG00000023995.12	7.09863	3.50613	0.837953	4.18417	2.86e-05	0.000211
Apoc2	ENSMUSG00000002992.17	8.37064	3.50547	0.936429	3.74344	0.000182	0.00110049
Muc1	ENSMUSG00000042784.9	78.955	3.49689	0.296815	11.7814	4.87e-32	9.81e-30
Celsr2	ENSMUSG00000068740.13	39.2792	3.47393	0.473242	7.3407	2.12e-13	7.01e-12
Gm10701	ENSMUSG00000074465.2	1443.43	3.47024	0.328726	10.5566	4.73e-26	6.01e-24
Gm867	ENSMUSG00000050157.6	4.41547	3.46964	1.04246	3.32833	0.000874	0.00438102
1700027A15Rik	ENSMUSG00000101968.6	23.7604	3.46551	0.511943	6.76932	1.29e-11	3.17e-10
B230303A05Rik	ENSMUSG00000113701.1	62.627	3.46424	0.509833	6.79486	1.08e-11	2.72e-10
B3galt5	ENSMUSG00000074892.9	72.8563	3.46121	0.398882	8.67727	4.05e-18	2.3e-16
Galnt13	ENSMUSG00000060988.12	5027.63	3.4487	0.387619	8.89714	5.73e-19	3.61e-17
Slc25a48	ENSMUSG00000021509.5	177.524	3.43817	0.500352	6.8715	6.35e-12	1.66e-10
Gm43057	ENSMUSG00000104937.1	224.102	3.43189	0.42368	8.10019	5.49e-16	2.42e-14
Gm12860	ENSMUSG00000086187.1	23.2308	3.43145	0.48436	7.08451	1.4e-12	4.04e-11
Clec4d	ENSMUSG00000030144.4	89.1495	3.40398	0.782135	4.35217	1.35e-05	0.000108
Htr2b	ENSMUSG00000026228.6	183.748	3.39309	0.254042	13.3564	1.09e-40	4.11e-38
Gm43305	ENSMUSG00000105703.2	168.355	3.39109	0.499292	6.7918	1.11e-11	2.77e-10
Cldn23	ENSMUSG00000055976.6	20.1577	3.38586	0.563342	6.0103	1.85e-09	3.22e-08
Alpl	ENSMUSG00000028766.10	132.072	3.37609	0.454362	7.4304	1.08e-13	3.72e-12
Sspn	ENSMUSG00000030255.13	835.057	3.35667	1.05291	3.18799	0.00143264	0.0067159
Gm10635	ENSMUSG00000111765.1	21.2386	3.33845	0.48081	6.9434	3.83e-12	1.03e-10
Sox7	ENSMUSG00000063060.6	45.4033	3.32223	0.396593	8.37693	5.43e-17	2.71e-15
Gm30613	ENSMUSG00000105300.1	616.574	3.30128	0.23858	13.8372	1.52e-43	6.55e-41
Fer1l6	ENSMUSG00000037106.8	9.46549	3.2867	0.827272	3.97293	7.1e-05	0.000475
Gm33782	ENSMUSG00000112290.1	22.5105	3.28428	0.521898	6.29295	3.11e-10	6.07e-09
Fermt1	ENSMUSG00000027356.8	808.229	3.28179	0.37168	8.8296	1.05e-18	6.41e-17
7420701I03Rik	ENSMUSG00000113620.1	16.7998	3.2812	0.781185	4.20029	2.67e-05	0.000198
Ren1	ENSMUSG00000070645.5	4.09238	3.2743	0.958657	3.41551	0.000637	0.00331641
Gjb2	ENSMUSG00000046352.7	5.95111	3.26816	0.763676	4.27951	1.87e-05	0.000144
Lrrc55	ENSMUSG00000075224.9	29.7943	3.26153	0.747611	4.3626	1.29e-05	0.000103
Il1rn	ENSMUSG00000026981.15	37.5383	3.25936	0.666813	4.88797	1.02e-06	1.05e-05
Muc20	ENSMUSG00000035638.14	80.7105	3.22932	0.709474	4.55171	5.32e-06	4.71e-05
Serpine1	ENSMUSG00000037411.10	996.346	3.21351	0.294848	10.8989	1.17e-27	1.68e-25
Gm44275	ENSMUSG00000107768.1	9.49287	3.20908	0.803534	3.99371	6.5e-05	0.000439
Gm30414	ENSMUSG00000103067.1	138.588	3.20231	0.449204	7.12885	1.01e-12	2.97e-11
4930503B20Rik	ENSMUSG00000090202.1	3.75154	3.1888	0.940991	3.38877	0.000702	0.00360868
Tnn	ENSMUSG00000026725.17	6.88149	3.18656	1.00443	3.17249	0.00151136	0.00703329
AC183097.1	ENSMUSG00000116719.1	21.1737	3.17671	0.410845	7.73214	1.06e-14	4.1e-13
Ltbp1	ENSMUSG00000001870.16	52549.8	3.16267	0.17831	17.7369	2.18e-70	4.04e-67
4930433N12Rik	ENSMUSG00000042360.12	12.9153	3.16265	0.587456	5.38364	7.3e-08	9.52e-07
Kcnh1	ENSMUSG00000058248.12	220.98	3.16113	0.200037	15.8027	2.98e-56	2.63e-53
S100g	ENSMUSG00000040808.4	22.1574	3.14239	0.590179	5.32447	1.01e-07	1.29e-06
4732490B19Rik	ENSMUSG00000085421.1	4.66336	3.14183	0.807945	3.88867	0.000101	0.000648
Lrrc2	ENSMUSG00000032495.8	5.36659	3.13057	1.00237	3.12318	0.0017891	0.0081476
AC165291.1	ENSMUSG00000117019.1	26.5309	3.12478	0.442688	7.05865	1.68e-12	4.76e-11
Hmgcll1	ENSMUSG00000007908.14	1563.01	3.11243	0.162733	19.126	1.53e-81	5.68e-78
Gsto1	ENSMUSG00000025068.7	373.955	3.10771	0.263508	11.7936	4.21e-32	8.78e-30
1700027J07Rik	ENSMUSG00000111422.1	82.3208	3.10528	0.553767	5.60757	2.05e-08	2.97e-07
Ttc9	ENSMUSG00000042734.6	384.05	3.10314	0.187563	16.5445	1.75e-61	2.03e-58
AC183097.4	ENSMUSG00000116992.1	11.9054	3.09617	0.552397	5.60497	2.08e-08	3.01e-07
Odaph	ENSMUSG00000096035.2	8.99858	3.07908	0.600969	5.12353	3e-07	3.47e-06
Sftpd	ENSMUSG00000021795.10	125.385	3.07327	0.416551	7.37791	1.61e-13	5.42e-12
Slc16a11	ENSMUSG00000040938.16	64.1417	3.07084	0.534697	5.74315	9.29e-09	1.44e-07
Plet1	ENSMUSG00000032068.14	365.788	3.06635	0.506604	6.05276	1.42e-09	2.51e-08
Tmprss7	ENSMUSG00000033177.13	42.1583	3.0649	0.512593	5.97921	2.24e-09	3.81e-08
Dgat2	ENSMUSG00000030747.5	497.446	3.0592	0.307767	9.93998	2.79e-23	2.76e-21
Gm4610	ENSMUSG00000104554.1	3.54479	3.05141	0.960356	3.17737	0.00148618	0.00693003
Rnf183	ENSMUSG00000063851.12	19.3299	3.04514	0.503855	6.04367	1.51e-09	2.65e-08
Ptprz1	ENSMUSG00000068748.7	6625.39	3.03612	0.336451	9.02398	1.81e-19	1.21e-17
Nmur2	ENSMUSG00000037393.2	81.8845	3.02893	0.377755	8.01825	1.07e-15	4.59e-14
AC167249.1	ENSMUSG00000116868.1	4.30067	3.0231	0.827359	3.65392	0.000258	0.00151051
Kcnd3os	ENSMUSG00000074346.6	28.146	3.02131	0.407323	7.41749	1.19e-13	4.07e-12
Gm26569	ENSMUSG00000097313.2	75.3946	3.01277	0.325754	9.2486	2.27e-20	1.67e-18
Gm38403	ENSMUSG00000112854.1	20.7316	3.00951	0.415146	7.24927	4.19e-13	1.32e-11
BC030870	ENSMUSG00000074300.4	11.1344	3.00265	0.602005	4.98775	6.11e-07	6.6e-06
8030451A03Rik	ENSMUSG00000073821.11	47.6545	3.00177	0.410926	7.30489	2.77e-13	9.01e-12
Tnfrsf11b	ENSMUSG00000063727.3	1020.66	2.9984	0.261985	11.4449	2.49e-30	4.16e-28
Inhba	ENSMUSG00000041324.14	177.482	2.9925	0.351522	8.51299	1.69e-17	8.93e-16
Mei4	ENSMUSG00000043289.12	24.3526	2.99242	0.445513	6.71679	1.86e-11	4.41e-10
Rgs1	ENSMUSG00000026358.13	1238.86	2.99029	0.38985	7.67035	1.72e-14	6.48e-13
2020-03-04	ENSMUSG00000039372.5	19.5859	2.98484	0.427613	6.98025	2.95e-12	8.05e-11
Tnr	ENSMUSG00000015829.13	31.4926	2.97964	0.407132	7.3186	2.51e-13	8.19e-12
F830045P16Rik	ENSMUSG00000043727.5	102.95	2.97476	0.288257	10.3198	5.73e-25	6.48e-23
Gm11685	ENSMUSG00000086733.1	5.05069	2.97231	0.868711	3.42151	0.000623	0.00325592
Ccdc73	ENSMUSG00000045106.12	11.5019	2.9608	0.686761	4.31126	1.62e-05	0.000127
Lbh	ENSMUSG00000024063.13	1681.41	2.95518	0.157374	18.7781	1.14e-78	3.53e-75
Hgfac	ENSMUSG00000029102.9	193.336	2.95357	0.426644	6.92279	4.43e-12	1.18e-10
Gpr45	ENSMUSG00000041907.9	6.51857	2.94345	0.770452	3.82042	0.000133	0.000837
Gm43302	ENSMUSG00000079362.5	415.707	2.93448	0.943293	3.11089	0.00186523	0.00843654
Gm14040	ENSMUSG00000086637.1	82.8345	2.92966	0.300699	9.74281	1.98e-22	1.8e-20
Cemip	ENSMUSG00000052353.13	597.726	2.92687	0.443828	6.59462	4.26e-11	9.6e-10
Ass1	ENSMUSG00000076441.9	134.558	2.91453	0.359903	8.09808	5.58e-16	2.46e-14
Ctgf	ENSMUSG00000019997.11	189.545	2.9046	0.337085	8.61681	6.88e-18	3.75e-16
Gadd45b	ENSMUSG00000015312.9	9.13165	2.89804	0.74412	3.89459	9.84e-05	0.000634
Hbegf	ENSMUSG00000024486.5	43.399	2.89475	0.348141	8.31488	9.18e-17	4.45e-15
Dnase1l3	ENSMUSG00000025279.7	9.73029	2.89183	0.925888	3.1233	0.00178833	0.00814635
Slc23a4	ENSMUSG00000029847.13	337.778	2.87847	0.29063	9.90423	3.99e-23	3.89e-21
Gm26903	ENSMUSG00000097836.1	10.9791	2.87132	0.615438	4.66549	3.08e-06	2.88e-05
AU022754	ENSMUSG00000097209.2	11.0769	2.86528	0.82416	3.4766	0.000508	0.00272501
Dyrk3	ENSMUSG00000016526.8	15.6908	2.85323	0.54937	5.19364	2.06e-07	2.47e-06
Nrg1	ENSMUSG00000062991.7	116431	2.84856	0.24549	11.6036	3.95e-31	7.18e-29
Ddit4l	ENSMUSG00000046818.7	34.4433	2.84375	0.413431	6.87842	6.05e-12	1.58e-10
Serinc2	ENSMUSG00000023232.17	541.101	2.83446	0.409287	6.92537	4.35e-12	1.17e-10
Gm20186	ENSMUSG00000106874.1	52.0877	2.82955	0.344977	8.20212	2.36e-16	1.08e-14
Gm44805	ENSMUSG00000109350.1	10.758	2.82596	0.777793	3.63331	0.00028	0.00161812
Dlx5	ENSMUSG00000029755.10	34.9937	2.81957	0.414953	6.79491	1.08e-11	2.72e-10
Epcam	ENSMUSG00000045394.9	344.888	2.81955	0.398426	7.07672	1.48e-12	4.25e-11
Dclk3	ENSMUSG00000032500.10	61.2896	2.81775	0.785065	3.58919	0.000332	0.00187447
Arhgef38	ENSMUSG00000040969.14	1641.7	2.81483	0.334302	8.42002	3.76e-17	1.91e-15
Cdh17	ENSMUSG00000028217.11	7.14745	2.8079	0.902006	3.11296	0.00185223	0.00839002
Mfsd4a	ENSMUSG00000059149.17	4500.58	2.80213	0.244194	11.475	1.76e-30	2.99e-28
Gm45145	ENSMUSG00000109076.1	14.3263	2.79903	0.907446	3.08451	0.00203886	0.00909979
Gprc5a	ENSMUSG00000046733.7	72.3641	2.79535	0.317806	8.79576	1.42e-18	8.42e-17
Fam3b	ENSMUSG00000022938.8	41.2402	2.79223	0.462503	6.03721	1.57e-09	2.75e-08
Rnf128	ENSMUSG00000031438.11	2472.04	2.78825	0.340372	8.19176	2.57e-16	1.18e-14
AC165271.1	ENSMUSG00000116641.1	53.0027	2.77325	0.354812	7.8161	5.45e-15	2.17e-13
Chchd10	ENSMUSG00000049422.7	5.39855	2.77089	0.785126	3.52923	0.000417	0.00228882
Cd24a	ENSMUSG00000047139.9	168.915	2.76301	0.328137	8.4203	3.76e-17	1.91e-15
Macc1	ENSMUSG00000041886.7	1596.88	2.76129	0.341918	8.07589	6.7e-16	2.92e-14
Clmn	ENSMUSG00000021097.15	2314.51	2.75938	0.639413	4.31548	1.59e-05	0.000124
Dusp10	ENSMUSG00000039384.8	363.44	2.75531	0.218393	12.6163	1.72e-36	5.05e-34
AC183097.2	ENSMUSG00000116812.1	35.313	2.75211	0.316685	8.69035	3.61e-18	2.05e-16
4930519L02Rik	ENSMUSG00000105652.1	4.46288	2.75132	0.847508	3.24637	0.00116887	0.0056449
Slc34a2	ENSMUSG00000029188.14	182.956	2.74915	0.566442	4.85336	1.21e-06	1.23e-05
Kng1	ENSMUSG00000022875.18	43.2857	2.72461	0.448229	6.07861	1.21e-09	2.17e-08
Grip1	ENSMUSG00000034813.17	22193.3	2.723	0.43015	6.33036	2.45e-10	4.83e-09
Msc	ENSMUSG00000025930.6	55.9985	2.71787	0.387904	7.00656	2.44e-12	6.78e-11
Gm20547	ENSMUSG00000092511.7	766.783	2.71526	0.822259	3.3022	0.000959	0.004758
Myb	ENSMUSG00000019982.15	751.031	2.69691	0.44083	6.11779	9.49e-10	1.72e-08
4833423E24Rik	ENSMUSG00000075217.1	118.835	2.69227	0.272733	9.87144	5.54e-23	5.32e-21
Rassf6	ENSMUSG00000029370.10	198.176	2.69114	0.480789	5.59733	2.18e-08	3.14e-07
Slc6a14	ENSMUSG00000031089.7	19.9682	2.67096	0.633351	4.21718	2.47e-05	0.000185
Atf3	ENSMUSG00000026628.13	987.784	2.66629	0.408902	6.52062	7e-11	1.51e-09
Adamdec1	ENSMUSG00000022057.8	5.56462	2.66136	0.821221	3.24073	0.00119222	0.00573084
Efna4	ENSMUSG00000028040.7	14.1785	2.65601	0.539659	4.92165	8.58e-07	8.96e-06
Il1a	ENSMUSG00000027399.1	101.922	2.65256	0.512336	5.17738	2.25e-07	2.68e-06
1700086L19Rik	ENSMUSG00000071265.10	6.54519	2.65058	0.864528	3.06593	0.00216995	0.00959201
Gm47499	ENSMUSG00000110923.1	77.1646	2.64706	0.357065	7.41337	1.23e-13	4.19e-12
Scin	ENSMUSG00000002565.16	534.794	2.64639	0.395311	6.69445	2.16e-11	5.08e-10
3830432H09Rik	ENSMUSG00000101731.1	9.69843	2.64541	0.714156	3.70425	0.000212	0.00126351
Sgcg	ENSMUSG00000035296.14	65.0759	2.64279	0.465559	5.67659	1.37e-08	2.06e-07
Rmst	ENSMUSG00000112117.1	1995.32	2.64269	0.392526	6.73251	1.67e-11	3.99e-10
Cfb	ENSMUSG00000090231.10	671.342	2.642	0.775107	3.40856	0.000653	0.00339248
Krt19	ENSMUSG00000020911.14	460.875	2.62149	0.410324	6.38884	1.67e-10	3.38e-09
Slc44a4	ENSMUSG00000007034.15	248.5	2.61811	0.384194	6.81454	9.46e-12	2.39e-10
Gm17171	ENSMUSG00000091457.1	189.613	2.61566	0.813917	3.21367	0.00131051	0.00622038
1700016P03Rik	ENSMUSG00000085609.1	13.5769	2.61551	0.505496	5.17414	2.29e-07	2.71e-06
Trim6	ENSMUSG00000072244.11	207.091	2.61454	0.305486	8.55865	1.14e-17	6.08e-16
Gm39214	ENSMUSG00000109754.1	24.7414	2.61313	0.528628	4.94322	7.68e-07	8.12e-06
Cers3	ENSMUSG00000030510.11	104.432	2.60919	0.479017	5.44697	5.12e-08	6.86e-07
Cfap161	ENSMUSG00000011154.17	27.4763	2.60526	0.464305	5.6111	2.01e-08	2.92e-07
Sytl3	ENSMUSG00000041831.16	593.942	2.60262	0.211986	12.2773	1.2e-34	2.96e-32
Tmc1	ENSMUSG00000024749.8	11.5438	2.60146	0.503445	5.16732	2.37e-07	2.8e-06
Erich3	ENSMUSG00000078161.8	99.4113	2.60077	0.492507	5.28069	1.29e-07	1.61e-06
Nr4a3	ENSMUSG00000028341.9	402.802	2.59359	0.305935	8.47759	2.3e-17	1.19e-15
Spag6l	ENSMUSG00000022783.11	19.757	2.58959	0.614674	4.21294	2.52e-05	0.000188
Gm30873	ENSMUSG00000109341.1	5.2362	2.58635	0.731587	3.53527	0.000407	0.0022431
Gm45304	ENSMUSG00000110329.1	17.6324	2.57912	0.5752	4.48388	7.33e-06	6.25e-05
Slc37a1	ENSMUSG00000024036.15	478.071	2.5769	0.287845	8.95238	3.48e-19	2.25e-17
Plat	ENSMUSG00000031538.6	863.426	2.5656	0.142023	18.0646	6.05e-73	1.25e-69
Krt8	ENSMUSG00000049382.10	93.8059	2.56127	0.363907	7.03827	1.95e-12	5.48e-11
Adm	ENSMUSG00000030790.15	8.16573	2.55136	0.712745	3.57962	0.000344	0.00193669
Gja1	ENSMUSG00000050953.10	11165.7	2.54192	0.256186	9.92216	3.33e-23	3.29e-21
Adgrg5	ENSMUSG00000061577.12	26.8273	2.5414	0.820686	3.09667	0.00195705	0.00879394
Gm28818	ENSMUSG00000101211.1	7.6892	2.53688	0.762197	3.32838	0.000874	0.00438102
Ldhd	ENSMUSG00000031958.16	41.2023	2.5287	0.392886	6.43623	1.22e-10	2.56e-09
Filip1l	ENSMUSG00000043336.14	6285.56	2.52818	0.571135	4.42659	9.57e-06	7.91e-05
Gm8075	ENSMUSG00000113321.1	6.94942	2.52241	0.762517	3.30801	0.00094	0.00467417
Has1	ENSMUSG00000003665.7	119.305	2.51305	0.413111	6.08325	1.18e-09	2.11e-08
Parvaos	ENSMUSG00000085049.1	8.91064	2.51247	0.54957	4.5717	4.84e-06	4.33e-05
Rgs4	ENSMUSG00000038530.11	125.254	2.50934	0.27077	9.26742	1.91e-20	1.41e-18
Cblc	ENSMUSG00000040525.13	250.975	2.50897	0.563775	4.4503	8.57e-06	7.17e-05
E030013I19Rik	ENSMUSG00000086843.3	148.739	2.50279	0.343488	7.28641	3.18e-13	1.03e-11
Snhg7os	ENSMUSG00000086775.7	11.4022	2.49732	0.802508	3.11189	0.00185893	0.00841831
Wfdc8	ENSMUSG00000070533.11	32.2152	2.49563	0.683598	3.65073	0.000261	0.00152794
Fosb	ENSMUSG00000003545.3	98.6089	2.4946	0.589595	4.23104	2.33e-05	0.000175
Slco4a1	ENSMUSG00000038963.15	808.589	2.49321	0.503613	4.95064	7.4e-07	7.86e-06
Tmprss11g	ENSMUSG00000079451.9	106.913	2.49263	0.403276	6.18095	6.37e-10	1.18e-08
Aoc1	ENSMUSG00000029811.14	21.5587	2.49208	0.587816	4.23955	2.24e-05	0.000169
Pigr	ENSMUSG00000026417.13	367.889	2.48947	0.503595	4.9434	7.68e-07	8.11e-06
Inhbb	ENSMUSG00000037035.5	155.827	2.48569	0.316548	7.85249	4.08e-15	1.65e-13
Noxo1	ENSMUSG00000019320.14	98.0074	2.48559	0.51788	4.79954	1.59e-06	1.57e-05
Map3k7cl	ENSMUSG00000025610.7	169.577	2.48469	0.334983	7.41735	1.19e-13	4.07e-12
Galnt3	ENSMUSG00000026994.9	236.773	2.48117	0.302974	8.18941	2.63e-16	1.19e-14
Plch1	ENSMUSG00000036834.16	11881.6	2.47512	0.29746	8.32086	8.73e-17	4.25e-15
Tmem45b	ENSMUSG00000041737.8	1137.27	2.47472	0.403959	6.12618	9e-10	1.63e-08
Cldn7	ENSMUSG00000018569.12	384.472	2.47059	0.380678	6.48996	8.59e-11	1.83e-09
Mal2	ENSMUSG00000024479.3	267.356	2.46828	0.378924	6.51393	7.32e-11	1.58e-09
Fer1l4	ENSMUSG00000013338.16	126.232	2.45858	0.445221	5.52216	3.35e-08	4.61e-07
Aloxe3	ENSMUSG00000020892.10	23.5823	2.45703	0.465416	5.27922	1.3e-07	1.62e-06
Vmn1r39	ENSMUSG00000093755.2	28.4119	2.44266	0.540278	4.52111	6.15e-06	5.35e-05
Gm44698	ENSMUSG00000109366.1	6.65198	2.44097	0.640256	3.81249	0.000138	0.000861
Gm45397	ENSMUSG00000109973.1	76.5897	2.42704	0.268928	9.02487	1.8e-19	1.21e-17
4933417E11Rik	ENSMUSG00000101848.1	69.6621	2.4256	0.491547	4.93463	8.03e-07	8.43e-06
Kcnc2	ENSMUSG00000035681.7	9709.55	2.42474	0.407394	5.95182	2.65e-09	4.44e-08
Tnip3	ENSMUSG00000044162.12	486.029	2.42409	0.787084	3.07983	0.00207119	0.00921964
Bhlhe40	ENSMUSG00000030103.11	158.198	2.42173	0.237537	10.1952	2.08e-24	2.21e-22
Doc2b	ENSMUSG00000020848.7	5.96705	2.41311	0.672054	3.59065	0.00033	0.00186565
Tjp3	ENSMUSG00000034917.8	283.25	2.40936	0.410303	5.87216	4.3e-09	6.98e-08
Enpp3	ENSMUSG00000019989.8	1585.94	2.40756	0.221653	10.8619	1.75e-27	2.46e-25
Dsp	ENSMUSG00000054889.10	469.176	2.40719	0.391087	6.15513	7.5e-10	1.38e-08
Gm13986	ENSMUSG00000087203.7	481.611	2.40424	0.205968	11.6729	1.75e-31	3.32e-29
Megf11	ENSMUSG00000036466.17	370.829	2.40056	0.340041	7.05962	1.67e-12	4.74e-11
Bdnf	ENSMUSG00000048482.14	1794.84	2.38812	0.350517	6.81312	9.55e-12	2.41e-10
Tenm1	ENSMUSG00000016150.15	222.88	2.38535	0.384782	6.19923	5.67e-10	1.06e-08
Ildr1	ENSMUSG00000022900.14	783.056	2.38385	0.669673	3.55972	0.000371	0.00206686
A230108P19Rik	ENSMUSG00000087125.1	12.3533	2.37913	0.566689	4.19831	2.69e-05	0.000199
F5	ENSMUSG00000026579.8	63.8058	2.36386	0.384378	6.14984	7.76e-10	1.42e-08
Add2	ENSMUSG00000030000.10	333.981	2.34894	0.29918	7.85126	4.12e-15	1.66e-13
Cilp	ENSMUSG00000042254.14	61.5951	2.34501	0.420049	5.5827	2.37e-08	3.39e-07
Gm21847	ENSMUSG00000094230.5	309.323	2.34214	0.288956	8.10554	5.25e-16	2.33e-14
Dennd2d	ENSMUSG00000027901.12	227.758	2.33534	0.2347	9.95033	2.51e-23	2.51e-21
Gm43391	ENSMUSG00000106004.4	161.305	2.32698	0.352433	6.60261	4.04e-11	9.13e-10
Inava	ENSMUSG00000041605.16	296.338	2.3266	0.431938	5.38643	7.19e-08	9.38e-07
Nr4a1	ENSMUSG00000023034.7	309.059	2.32631	0.217723	10.6847	1.2e-26	1.59e-24
Cpm	ENSMUSG00000020183.11	269.368	2.32049	0.435098	5.33327	9.65e-08	1.24e-06
Gm26799	ENSMUSG00000097579.1	53.708	2.31781	0.267291	8.67147	4.27e-18	2.38e-16
Gm15283	ENSMUSG00000087700.2	58.2907	2.31588	0.432716	5.35197	8.7e-08	1.12e-06
Krt7	ENSMUSG00000023039.17	2030.32	2.30841	0.406268	5.68198	1.33e-08	2.01e-07
Gadd45g	ENSMUSG00000021453.2	147.49	2.30049	0.304729	7.5493	4.38e-14	1.59e-12
Lrp8	ENSMUSG00000028613.14	442.495	2.2988	0.186095	12.3528	4.7e-35	1.21e-32
Cyp26b1	ENSMUSG00000063415.12	104.777	2.2912	0.63591	3.60303	0.000315	0.00179094
Lrrc36	ENSMUSG00000054320.16	910.949	2.28155	0.486819	4.68665	2.78e-06	2.62e-05
Cdh1	ENSMUSG00000000303.12	1545.39	2.2736	0.394366	5.76519	8.16e-09	1.28e-07
Tmeff1	ENSMUSG00000028347.14	741.866	2.27114	0.148751	15.268	1.25e-52	9.65e-50
4930430E12Rik	ENSMUSG00000085295.7	24.6559	2.27108	0.73063	3.10839	0.00188112	0.00849598
Gm45716	ENSMUSG00000110344.1	67.6005	2.26283	0.244326	9.26153	2.02e-20	1.48e-18
Rspo2	ENSMUSG00000051920.7	10.4203	2.25583	0.570768	3.95227	7.74e-05	0.000512
Dsg2	ENSMUSG00000044393.15	454.02	2.2535	0.407113	5.53532	3.11e-08	4.31e-07
Ppm1j	ENSMUSG00000002228.7	14.6568	2.25315	0.430556	5.2331	1.67e-07	2.04e-06
Gm34829	ENSMUSG00000111610.1	7.42048	2.25196	0.735385	3.06229	0.00219651	0.009695
Megf10	ENSMUSG00000024593.15	15.67	2.24929	0.633332	3.55152	0.000383	0.00212291
Urah	ENSMUSG00000025481.12	81.1959	2.24877	0.414364	5.42703	5.73e-08	7.6e-07
Mex3a	ENSMUSG00000074480.4	8.69675	2.24738	0.50754	4.42799	9.51e-06	7.86e-05
Bcas1	ENSMUSG00000013523.13	24.2606	2.24233	0.69821	3.21154	0.00132024	0.00625859
6430562O15Rik	ENSMUSG00000097828.2	26.2659	2.24007	0.313723	7.14027	9.31e-13	2.75e-11
Fcgbp	ENSMUSG00000047730.17	74.5806	2.23957	0.405779	5.51918	3.41e-08	4.68e-07
Mpzl2	ENSMUSG00000032092.5	39.1666	2.2388	0.389238	5.75175	8.83e-09	1.37e-07
Gm40614	ENSMUSG00000085451.2	7.70831	2.23791	0.688161	3.25201	0.00114592	0.00555143
Speer4cos	ENSMUSG00000089871.1	55.5527	2.23524	0.427429	5.2295	1.7e-07	2.07e-06
AL805899.1	ENSMUSG00000117123.1	594.134	2.22781	0.379486	5.87059	4.34e-09	7.04e-08
Gck	ENSMUSG00000041798.15	46.768	2.22508	0.449477	4.95037	7.41e-07	7.87e-06
Ephx4	ENSMUSG00000033805.12	184.351	2.21436	0.392338	5.64401	1.66e-08	2.46e-07
Fam135b	ENSMUSG00000036800.8	261.396	2.20525	0.512363	4.30409	1.68e-05	0.00013
Gm42788	ENSMUSG00000107388.1	8.32535	2.20299	0.555199	3.96793	7.25e-05	0.000485
Ankrd37	ENSMUSG00000050914.16	50.6328	2.20099	0.392098	5.61335	1.98e-08	2.89e-07
Tmem200a	ENSMUSG00000049420.9	2754.16	2.19063	0.252637	8.67105	4.28e-18	2.38e-16
Lad1	ENSMUSG00000041782.14	90.4874	2.1857	0.523338	4.17646	2.96e-05	0.000218
Fank1	ENSMUSG00000053111.13	91.3421	2.18153	0.39221	5.56213	2.66e-08	3.78e-07
Nts	ENSMUSG00000019890.4	6.52623	2.1795	0.671163	3.24736	0.00116483	0.00562833
Col12a1	ENSMUSG00000032332.17	8078.66	2.17874	0.232638	9.36534	7.58e-21	5.88e-19
Sectm1a	ENSMUSG00000025165.12	78.8343	2.17806	0.697399	3.12311	0.00178948	0.0081476
Pmepa1	ENSMUSG00000038400.15	5139.85	2.17541	0.12454	17.4676	2.53e-68	3.91e-65
Cdcp1	ENSMUSG00000035498.10	976.928	2.17279	0.366289	5.9319	2.99e-09	4.96e-08
0610040J01Rik	ENSMUSG00000060512.7	1718.49	2.17046	0.207618	10.4541	1.4e-25	1.67e-23
2010300C02Rik	ENSMUSG00000026090.16	901.437	2.16679	0.440611	4.91768	8.76e-07	9.14e-06
Wwc1	ENSMUSG00000018849.6	2760.45	2.16307	0.597278	3.62155	0.000293	0.00168192
Wdr72	ENSMUSG00000044976.17	1461.13	2.16196	0.288667	7.48944	6.92e-14	2.44e-12
Ifi47	ENSMUSG00000078920.3	431.854	2.16191	0.550045	3.93043	8.48e-05	0.000556
A230001M10Rik	ENSMUSG00000105891.4	7.66616	2.15915	0.594796	3.63007	0.000283	0.00163424
Tnfaip3	ENSMUSG00000019850.11	385.665	2.15892	0.538288	4.01072	6.05e-05	0.000412
Mannr	ENSMUSG00000102590.1	325.236	2.15798	0.249085	8.66364	4.57e-18	2.54e-16
Slc16a3	ENSMUSG00000025161.16	215.338	2.15506	0.506211	4.25724	2.07e-05	0.000157
Tnfsf10	ENSMUSG00000039304.11	1429.14	2.15502	0.299931	7.18505	6.72e-13	2.03e-11
Arid5a	ENSMUSG00000037447.16	1905.99	2.14398	0.146989	14.586	3.45e-48	2e-45
Spns2	ENSMUSG00000040447.15	3650.28	2.14293	0.235046	9.11705	7.72e-20	5.34e-18
Far2os2	ENSMUSG00000086777.3	19.7819	2.14292	0.386823	5.53979	3.03e-08	4.22e-07
Ppp1r14c	ENSMUSG00000040653.6	188.007	2.13941	0.458339	4.66774	3.05e-06	2.85e-05
Nfe2l3	ENSMUSG00000029832.16	195.218	2.13924	0.480287	4.45409	8.43e-06	7.06e-05
Smtnl2	ENSMUSG00000045667.14	137.117	2.13754	0.464832	4.59853	4.25e-06	3.86e-05
Sh2d6	ENSMUSG00000052631.15	45.0289	2.13263	0.524238	4.06806	4.74e-05	0.00033
Tmie	ENSMUSG00000049555.10	20.4309	2.1313	0.472928	4.50661	6.59e-06	5.68e-05
Mecomos	ENSMUSG00000085702.8	6.21013	2.12917	0.615296	3.46039	0.000539	0.00286622
Trpm6	ENSMUSG00000024727.8	1699.82	2.12377	0.36548	5.8109	6.21e-09	9.92e-08
Pard3bos3	ENSMUSG00000085400.1	67.1191	2.121	0.306341	6.92367	4.4e-12	1.18e-10
Mmp12	ENSMUSG00000049723.14	25.3684	2.1197	0.614433	3.44984	0.000561	0.00296616
Car2	ENSMUSG00000027562.12	172.441	2.11729	0.251128	8.43115	3.42e-17	1.75e-15
Hrasls	ENSMUSG00000022525.13	8.04278	2.11305	0.688049	3.07107	0.00213292	0.00945359
6430571L13Rik	ENSMUSG00000037977.6	11.3294	2.10955	0.576699	3.65797	0.000254	0.00148868
Dlx6	ENSMUSG00000029754.13	19.7065	2.10781	0.619957	3.39993	0.000674	0.00348379
E230016K23Rik	ENSMUSG00000051832.7	31.6346	2.10501	0.321293	6.55168	5.69e-11	1.25e-09
Sncaip	ENSMUSG00000024534.15	16572.6	2.10451	0.228129	9.2251	2.83e-20	2.06e-18
Epb41l4b	ENSMUSG00000028434.12	1550.45	2.10306	0.394231	5.3346	9.58e-08	1.23e-06
Mtus2	ENSMUSG00000029651.16	277.083	2.0968	0.222572	9.42074	4.48e-21	3.61e-19
Chrdl2	ENSMUSG00000030732.13	245.775	2.09621	0.350228	5.98528	2.16e-09	3.68e-08
Ano4	ENSMUSG00000035189.16	5082.65	2.09161	0.310099	6.74496	1.53e-11	3.69e-10
Olfr56	ENSMUSG00000040328.15	3478.59	2.08	0.643197	3.23384	0.00122137	0.00585043
Nol4	ENSMUSG00000041923.15	41.572	2.07521	0.375757	5.52275	3.34e-08	4.6e-07
Cpe	ENSMUSG00000037852.8	681.474	2.06842	0.159002	13.0088	1.09e-38	3.61e-36
Wfdc2	ENSMUSG00000017723.11	1493.25	2.06785	0.418162	4.94509	7.61e-07	8.06e-06
Gpr176	ENSMUSG00000040133.2	163.728	2.05744	0.313428	6.56431	5.23e-11	1.15e-09
Gm38139	ENSMUSG00000103204.1	13.2937	2.04052	0.651637	3.13137	0.00173993	0.00796306
P2ry2	ENSMUSG00000032860.5	117.242	2.03581	0.341273	5.96533	2.44e-09	4.11e-08
Rgs16	ENSMUSG00000026475.7	16.4173	2.03475	0.50054	4.06512	4.8e-05	0.000333
Il23r	ENSMUSG00000049093.9	43.6769	2.0331	0.290764	6.99227	2.7e-12	7.43e-11
Lamb3	ENSMUSG00000026639.18	481.486	2.03059	0.243025	8.35546	6.52e-17	3.21e-15
2010001K21Rik	ENSMUSG00000051606.5	81.0065	2.02849	0.267375	7.5867	3.28e-14	1.21e-12
Reep6	ENSMUSG00000035504.16	14.9086	2.02619	0.636008	3.1858	0.00144356	0.00676018
2810408A11Rik	ENSMUSG00000018570.17	19.2092	2.02155	0.607153	3.32956	0.00087	0.00436572
Ikzf3	ENSMUSG00000018168.8	270.011	2.02117	0.283063	7.14035	9.31e-13	2.75e-11
Lrriq1	ENSMUSG00000019892.13	70.0846	2.01987	0.391395	5.1607	2.46e-07	2.89e-06
Serpina1e	ENSMUSG00000072849.10	112.481	2.01776	0.371473	5.43178	5.58e-08	7.42e-07
Pkhd1	ENSMUSG00000043760.16	2648.62	2.01532	0.453007	4.44876	8.64e-06	7.22e-05
Fam167a	ENSMUSG00000035095.11	8.571	2.01254	0.617434	3.25952	0.00111601	0.00542495
Ccdc192	ENSMUSG00000058925.11	79.2809	2.01146	0.247439	8.12913	4.32e-16	1.93e-14
Fam83b	ENSMUSG00000032358.12	76.0039	2.01138	0.282389	7.12271	1.06e-12	3.1e-11
Dlx6os2	ENSMUSG00000094868.1	10.0684	2.00683	0.630663	3.18209	0.00146215	0.00683519
Tgfbi	ENSMUSG00000035493.10	1251.55	2.00142	0.24064	8.31706	9.02e-17	4.38e-15
