# Supplementary material for: The pregnant myometrium is epigenetically activated at contractility-driving gene loci prior to the onset of labor in mice
Source: PLoS Biol. 2020 Jul 15;18(7):e3000710. doi: 10.1371/journal.pbio.3000710 (PMC7384763; doi:10.1371/journal.pbio.3000710)
Supplement: S6 Data — (XLSX) [file pbio.3000710.s014.xlsx]

## Sheet: Upregulated intron genes in LAB
Significantly upregulated (log2FC >= 2, padj < 0.01) intron genes in LAB vs. D15 RNA-seq (n=5).
gene_name	gene_id	baseMean	log2FoldChange	lfcSE	stat	pvalue	padj
Wnt7a	ENSMUSG00000030093.7	139.566	10.0586	0.981237	10.2509	1.17264e-24	1.27886e-22
Clec2e	ENSMUSG00000030155.7	90.2517	9.42848	0.93808	10.0508	9.1099e-24	9.3832e-22
Prss22	ENSMUSG00000045027.7	35.1526	8.65006	0.960683	9.00407	2.17494e-19	1.44528e-17
Slc16a14	ENSMUSG00000026220.6	676.183	8.61133	0.51208	16.8164	1.85151e-63	2.28847e-60
Sprr2f	ENSMUSG00000050635.1	33.9038	8.59816	0.99455	8.64528	5.36752e-18	2.95293e-16
D130009I18Rik	ENSMUSG00000115432.1	2855.42	8.55158	1.49208	5.73131	9.96591e-09	1.5308e-07
Adgrg7	ENSMUSG00000022755.4	44.0236	8.39352	1.01066	8.30498	9.98384e-17	4.82032e-15
Gm26877	ENSMUSG00000097373.1	29.2448	8.38062	1.00148	8.36819	5.85085e-17	2.89266e-15
Muc4	ENSMUSG00000079620.13	1154.81	8.35357	0.869152	9.61118	7.17246e-22	6.12799e-20
Krt20	ENSMUSG00000035775.2	25.2217	8.17076	1.1276	7.24612	4.28876e-13	1.34541e-11
Alox12e	ENSMUSG00000018907.10	23.9172	8.09481	1.11701	7.24683	4.26637e-13	1.34293e-11
Nyap2	ENSMUSG00000054976.14	129.249	8.08678	0.699575	11.5596	6.6042e-31	1.17733e-28
Gm10415	ENSMUSG00000107623.1	22.0671	7.97389	1.05737	7.54128	4.65379e-14	1.6819e-12
4930544M13Rik	ENSMUSG00000051758.6	29.7737	7.82722	0.976688	8.01404	1.10996e-15	4.73074e-14
Acod1	ENSMUSG00000022126.6	81.8716	7.80838	2.49824	3.12555	0.00177474	0.00809437
1700041M19Rik	ENSMUSG00000100857.2	19.2462	7.77861	0.981153	7.92803	2.22656e-15	9.19387e-14
Trim40	ENSMUSG00000073399.9	17.393	7.63571	1.1158	6.84324	7.74225e-12	1.98262e-10
Il1f6	ENSMUSG00000026984.4	36.4161	7.53927	1.1285	6.68078	2.37667e-11	5.53562e-10
Scn9a	ENSMUSG00000075316.11	15.1338	7.43163	1.5046	4.93926	7.84182e-07	8.26534e-06
Frem3	ENSMUSG00000042353.9	14.9125	7.40814	0.993661	7.4554	8.95938e-14	3.12231e-12
Ctxn3	ENSMUSG00000069372.3	14.8379	7.40138	1.0248	7.22224	5.11399e-13	1.58816e-11
Gm29530	ENSMUSG00000102029.1	32.6894	7.378	1.08519	6.7988	1.05493e-11	2.65378e-10
Prss32	ENSMUSG00000048992.9	12.5984	7.16797	1.26374	5.67201	1.41128e-08	2.1135e-07
2310007B03Rik	ENSMUSG00000034159.12	12.5241	7.1566	1.10909	6.45268	1.0989e-10	2.31518e-09
Gm9195	ENSMUSG00000109446.1	12.1724	7.11728	0.963965	7.38334	1.54373e-13	5.2323e-12
Tbpl2	ENSMUSG00000061809.8	10.8247	6.9482	1.0468	6.63756	3.18928e-11	7.30894e-10
Kap	ENSMUSG00000032758.4	1534.59	6.93158	0.713441	9.71571	2.58453e-22	2.32608e-20
Olfm4	ENSMUSG00000022026.7	10.6637	6.93066	1.15707	5.98986	2.10015e-09	3.59528e-08
Gm49431	ENSMUSG00000116130.1	10.5418	6.91131	1.0649	6.49012	8.57703e-11	1.8318e-09
Dsg3	ENSMUSG00000056632.8	23.3971	6.89547	1.03487	6.66312	2.68068e-11	6.18156e-10
Ptprh	ENSMUSG00000035429.13	100.58	6.84159	0.726887	9.41218	4.85943e-21	3.86668e-19
Gm40477	ENSMUSG00000113940.1	8.88486	6.66515	1.0665	6.24956	4.11619e-10	7.88369e-09
5330439A09Rik	ENSMUSG00000089708.1	13.3651	6.66288	1.00314	6.64206	3.09329e-11	7.09773e-10
Ptprn	ENSMUSG00000026204.15	8.33201	6.56707	1.14436	5.73864	9.54377e-09	1.47206e-07
Trim15	ENSMUSG00000050747.14	160.411	6.53999	1.19531	5.47136	4.46595e-08	6.01298e-07
Gm45012	ENSMUSG00000109052.1	7.9203	6.50223	1.10545	5.88197	4.05416e-09	6.59913e-08
Clca1	ENSMUSG00000028255.6	17.5794	6.47432	1.00641	6.43308	1.25042e-10	2.60481e-09
Gm15600	ENSMUSG00000085969.1	7.73704	6.46173	1.00976	6.39928	1.56112e-10	3.1736e-09
Clca3b	ENSMUSG00000037033.9	10.9155	6.37513	1.10085	5.79109	6.99294e-09	1.09965e-07
Gm6325	ENSMUSG00000081778.1	10.9311	6.37392	1.14985	5.54327	2.96875e-08	4.14775e-07
Gm35019	ENSMUSG00000115326.1	70.34	6.3435	0.542349	11.6964	1.33051e-31	2.54305e-29
Cxcl2	ENSMUSG00000058427.10	6.80523	6.28154	1.67388	3.75269	0.000174946	0.00106519
4930459C07Rik	ENSMUSG00000112762.1	6.65398	6.2509	1.20841	5.17285	2.30547e-07	2.73121e-06
Il24	ENSMUSG00000026420.16	42.0957	6.20072	0.702149	8.83106	1.03689e-18	6.34454e-17
Tspan1	ENSMUSG00000028699.9	88.4415	6.18058	0.532816	11.5998	4.12938e-31	7.43288e-29
Golt1a	ENSMUSG00000103421.1	20.6647	6.1759	0.94058	6.56606	5.16656e-11	1.14169e-09
Lipm	ENSMUSG00000056078.5	6.3096	6.17164	1.02717	6.0084	1.87365e-09	3.25257e-08
Gbp2b	ENSMUSG00000040264.10	71.283	6.15962	1.95279	3.15426	0.00160903	0.00742444
Ghrh	ENSMUSG00000027643.9	6.16931	6.13455	1.23791	4.95558	7.21139e-07	7.68386e-06
Ccnb3	ENSMUSG00000051592.14	37.9441	6.09886	0.953719	6.39481	1.60743e-10	3.26058e-09
Padi3	ENSMUSG00000025328.9	19.1441	6.02023	0.982562	6.12707	8.9511e-10	1.62699e-08
Arg1	ENSMUSG00000019987.9	71.1651	5.99763	0.754039	7.954	1.80591e-15	7.50709e-14
Oog1	ENSMUSG00000096576.2	5.53478	5.98474	1.52686	3.91965	8.86771e-05	0.000577679
Myo3b	ENSMUSG00000042064.13	1840.23	5.93393	0.194751	30.4694	6.63821e-204	1.23072e-199
Pnoc	ENSMUSG00000045731.6	5.3674	5.9335	1.38624	4.2803	1.86645e-05	0.000143228
Entpd8	ENSMUSG00000036813.11	17.9314	5.89976	1.0617	5.55692	2.74579e-08	3.87715e-07
Gm30806	ENSMUSG00000114697.1	34.0833	5.8922	0.703649	8.37378	5.57968e-17	2.77338e-15
Lcn2	ENSMUSG00000026822.14	334.754	5.88769	0.726738	8.10154	5.42686e-16	2.40129e-14
Gm35733	ENSMUSG00000114843.1	5.00665	5.83033	1.14376	5.09752	3.44125e-07	3.92861e-06
Cyp2d10	ENSMUSG00000094806.2	4.77198	5.76932	1.44641	3.98873	6.64285e-05	0.000447849
Bcl2l15	ENSMUSG00000044165.12	328.043	5.76805	0.46586	12.3815	3.29122e-35	8.71704e-33
C430002N11Rik	ENSMUSG00000101581.6	567.565	5.73099	0.468358	12.2364	1.98756e-34	4.78563e-32
Prl8a6	ENSMUSG00000021345.16	6.91517	5.71135	1.09211	5.22967	1.69817e-07	2.06996e-06
Taf7l	ENSMUSG00000009596.9	4.48797	5.67753	1.24826	4.54837	5.40632e-06	4.76846e-05
Rp1l1	ENSMUSG00000046049.7	14.6104	5.65122	0.906975	6.23085	4.63914e-10	8.80344e-09
Prl2a1	ENSMUSG00000022886.5	4.34856	5.63315	1.5457	3.6444	0.000268013	0.00155816
Prl7b1	ENSMUSG00000021347.3	4.25098	5.60422	1.31231	4.27051	1.95025e-05	0.000149042
Prl2c2	ENSMUSG00000079092.4	4.24413	5.59822	1.43597	3.89856	9.67659e-05	0.000624666
Syt16	ENSMUSG00000044912.10	648.989	5.58006	0.761348	7.32919	2.31547e-13	7.598e-12
1700063K16Rik	ENSMUSG00000102036.1	4.19012	5.57727	1.16857	4.77273	1.81747e-06	1.7716e-05
Ptgs2	ENSMUSG00000032487.8	36.7534	5.56076	0.612459	9.07939	1.09182e-19	7.46952e-18
Alox15	ENSMUSG00000018924.6	21.6455	5.47173	0.9293	5.88801	3.90863e-09	6.37905e-08
Kndc1	ENSMUSG00000066129.15	3.76293	5.43005	1.17308	4.62887	3.67669e-06	3.37622e-05
Glra2	ENSMUSG00000018589.8	3.77124	5.42441	1.10453	4.91106	9.05859e-07	9.41403e-06
Gm45924	ENSMUSG00000115620.1	3.72682	5.40432	1.20856	4.4717	7.7599e-06	6.56634e-05
Mmp7	ENSMUSG00000018623.9	143.366	5.35653	1.07383	4.98827	6.09223e-07	6.59369e-06
Sult1e1	ENSMUSG00000029272.8	3.59087	5.35047	1.43589	3.72622	0.00019437	0.00116887
Gm1965	ENSMUSG00000090254.7	5.32143	5.33055	1.15282	4.62392	3.76547e-06	3.45091e-05
Ptgdr2	ENSMUSG00000034117.3	11.795	5.32805	0.985901	5.40425	6.50819e-08	8.55758e-07
BC016579	ENSMUSG00000033187.8	66.04	5.31808	0.405482	13.1155	2.68517e-39	9.39302e-37
Ifi202b	ENSMUSG00000026535.9	3.45628	5.30591	1.73435	3.05931	0.00221845	0.00977192
Ltf	ENSMUSG00000032496.7	31795.1	5.30588	0.342937	15.4719	5.36991e-54	4.52537e-51
Gm15866	ENSMUSG00000087290.2	76.2158	5.30494	0.574946	9.22686	2.78689e-20	2.03421e-18
Pdcd1	ENSMUSG00000026285.7	3.35433	5.26343	1.65108	3.18786	0.00143328	0.00671713
Cntnap3	ENSMUSG00000033063.8	215.392	5.25415	1.03093	5.09653	3.45929e-07	3.94436e-06
1700016C15Rik	ENSMUSG00000015962.5	3.30982	5.24101	1.09362	4.79237	1.6482e-06	1.61681e-05
Tmprss11d	ENSMUSG00000061259.11	35.6966	5.20379	0.608932	8.54576	1.27691e-17	6.76398e-16
Gtsf1	ENSMUSG00000022487.14	3.08895	5.14091	1.42793	3.60025	0.000317907	0.00180778
Gper1	ENSMUSG00000053647.4	3.06938	5.1328	1.47718	3.47472	0.000511378	0.00274016
Gm7804	ENSMUSG00000103357.1	3.06306	5.1221	1.18541	4.32096	1.55352e-05	0.000121477
Noxa1	ENSMUSG00000036805.13	20.0063	5.08895	0.814695	6.24645	4.19882e-10	8.02796e-09
Dio2	ENSMUSG00000007682.6	689.033	5.06584	0.415796	12.1835	3.80649e-34	9.04773e-32
Il6	ENSMUSG00000025746.11	18.5022	5.06239	1.16457	4.34701	1.38005e-05	0.000109765
Grpr	ENSMUSG00000031364.2	25.3023	5.02337	0.732829	6.85476	7.14348e-12	1.842e-10
Gm40915	ENSMUSG00000114404.1	2.82898	5.00959	1.19067	4.20737	2.58358e-05	0.000192213
Tmem178	ENSMUSG00000024245.4	67.855	5.00811	0.535991	9.34365	9.3065e-21	7.04255e-19
AC140413.1	ENSMUSG00000117655.1	2.73257	4.96093	1.50402	3.29846	0.000972184	0.00481161
Lipk	ENSMUSG00000024771.7	44.9977	4.95781	0.682645	7.26265	3.79579e-13	1.20503e-11
Mkrn2os	ENSMUSG00000068011.4	8.95502	4.94634	0.953161	5.18941	2.10957e-07	2.52985e-06
Tmprss11b	ENSMUSG00000035861.6	2.70202	4.94626	1.19419	4.14193	3.44399e-05	0.000249323
Malrd1	ENSMUSG00000075520.5	1055.59	4.93129	0.419845	11.7455	7.44779e-32	1.45349e-29
Egfl6	ENSMUSG00000000402.2	215.279	4.92411	0.343438	14.3377	1.2721e-46	6.73848e-44
Nppc	ENSMUSG00000026241.5	20.4768	4.90158	0.674556	7.26637	3.6927e-13	1.17836e-11
Bcas1os2	ENSMUSG00000086999.1	3.99991	4.89473	1.09273	4.47936	7.48669e-06	6.36129e-05
Clec4e	ENSMUSG00000030142.10	86.7571	4.87014	1.37411	3.54421	0.00039379	0.00217612
4930412B13Rik	ENSMUSG00000086221.1	3.90503	4.86156	1.12626	4.31654	1.58497e-05	0.00012378
Myh2	ENSMUSG00000033196.17	3.8823	4.85033	1.14821	4.22426	2.39727e-05	0.000179505
AC105304.1	ENSMUSG00000117110.1	2.53536	4.84847	1.18876	4.07859	4.53101e-05	0.00031688
Gm48053	ENSMUSG00000112837.1	3.79208	4.81564	1.10475	4.35904	1.30635e-05	0.00010444
Gm2115	ENSMUSG00000097789.2	32.2822	4.78298	0.494705	9.66834	4.10992e-22	3.64584e-20
Glrp1	ENSMUSG00000062310.7	13.1235	4.77413	0.871805	5.47614	4.347e-08	5.86561e-07
Serpina9	ENSMUSG00000058260.2	12.7977	4.74329	0.862548	5.49916	3.81597e-08	5.19824e-07
Gm6999	ENSMUSG00000097927.2	2.33346	4.74252	1.24633	3.8052	0.000141689	0.000882403
Trdc	ENSMUSG00000104876.1	3.56343	4.73959	1.1071	4.28107	1.85994e-05	0.000142788
Mindy4b-ps	ENSMUSG00000101860.4	2.34371	4.73301	1.24982	3.78696	0.000152504	0.000942161
Thbs1	ENSMUSG00000040152.8	1787.05	4.71803	0.314417	15.0056	6.74587e-51	4.81032e-48
1700029J03Rik	ENSMUSG00000099968.7	23.834	4.71796	0.661406	7.13323	9.80412e-13	2.88521e-11
Btbd17	ENSMUSG00000000202.9	18.9143	4.70593	0.795741	5.9139	3.34101e-09	5.50598e-08
Gm47754	ENSMUSG00000114784.1	321.22	4.69765	0.352788	13.3158	1.87413e-40	6.94926e-38
Slc12a3	ENSMUSG00000031766.4	3.48267	4.69232	1.15232	4.07205	4.66012e-05	0.000324563
Gm36426	ENSMUSG00000113796.1	3.46078	4.68492	1.14663	4.08583	4.39203e-05	0.000308207
E030025P04Rik	ENSMUSG00000078605.2	10.379	4.68465	0.867811	5.39824	6.7297e-08	8.82381e-07
Zbtb12	ENSMUSG00000049823.9	3.42031	4.68154	1.16252	4.02707	5.64751e-05	0.00038608
Elf3	ENSMUSG00000003051.13	220.617	4.66641	0.459435	10.1568	3.08941e-24	3.23603e-22
Galntl5	ENSMUSG00000028938.9	2.19306	4.64395	1.27764	3.63479	0.000278205	0.00161135
Speer9-ps1	ENSMUSG00000107956.1	14.9732	4.63964	0.875521	5.29929	1.16254e-07	1.46522e-06
Tmem54	ENSMUSG00000028786.15	27.0439	4.63141	0.651542	7.10839	1.17408e-12	3.42255e-11
Bglap3	ENSMUSG00000074489.9	4.91162	4.59809	1.22419	3.75603	0.000172629	0.00105177
AI463229	ENSMUSG00000114828.1	30.7957	4.59672	0.636624	7.22046	5.18131e-13	1.6037e-11
Uox	ENSMUSG00000028186.14	33.7809	4.59281	0.930575	4.93546	7.99635e-07	8.39957e-06
Gm15482	ENSMUSG00000086711.1	2.09282	4.57534	1.26897	3.60555	0.00031149	0.00177693
H60c	ENSMUSG00000091618.3	55.8892	4.55227	0.541045	8.41386	3.96729e-17	1.99874e-15
Gm30083	ENSMUSG00000115726.1	2.04123	4.54747	1.28458	3.54004	0.000400062	0.00220551
Gm43821	ENSMUSG00000105219.1	13.5297	4.52221	0.819827	5.51605	3.46696e-08	4.75424e-07
Hsd17b2	ENSMUSG00000031844.8	152.646	4.5102	0.582666	7.74064	9.89212e-15	3.84486e-13
Gm49231	ENSMUSG00000115013.1	1.98	4.49683	1.30909	3.43507	0.000592406	0.00311315
Il1f9	ENSMUSG00000044103.4	41.5317	4.49131	0.754793	5.95038	2.67521e-09	4.47336e-08
Gm28040	ENSMUSG00000115958.1	75.1499	4.48728	0.594937	7.54245	4.61212e-14	1.67009e-12
Gdpd2	ENSMUSG00000019359.14	4.54456	4.48202	1.18013	3.7979	0.00014593	0.000906073
Apobec2	ENSMUSG00000040694.4	13.4178	4.47302	0.696838	6.41903	1.37149e-10	2.83156e-09
Tnc	ENSMUSG00000028364.15	18207.7	4.44944	0.296933	14.9847	9.25053e-51	6.35203e-48
4930578I06Rik	ENSMUSG00000021961.6	2.955	4.44158	1.40468	3.16198	0.00156699	0.00725394
2310069B03Rik	ENSMUSG00000100291.6	6.16689	4.44124	1.40681	3.15696	0.00159423	0.00736714
Itgb6	ENSMUSG00000026971.15	1738.62	4.41719	0.375424	11.7659	5.85241e-32	1.15429e-29
Ccdc33	ENSMUSG00000037716.15	38.1582	4.41386	0.693834	6.36156	1.99719e-10	4.0117e-09
Ddit4	ENSMUSG00000020108.4	2.88123	4.41115	1.13764	3.87745	0.000105556	0.000675062
Gm43150	ENSMUSG00000106777.1	1.85978	4.40939	1.37888	3.19781	0.00138473	0.00652591
Trpv6	ENSMUSG00000029868.13	1281.82	4.40388	0.295743	14.8909	3.77461e-50	2.41315e-47
Chil6	ENSMUSG00000027902.8	8.14731	4.39066	0.966884	4.54105	5.5976e-06	4.90915e-05
Cxcl17	ENSMUSG00000060188.6	223.584	4.37355	0.427566	10.2289	1.47116e-24	1.56755e-22
LOC102637012	ENSMUSG00000111473.1	1.78693	4.34647	1.34368	3.23476	0.00121746	0.00583548
Wnt7b	ENSMUSG00000022382.15	365.592	4.34553	0.377868	11.5001	1.31701e-30	2.282e-28
Gm20663	ENSMUSG00000093378.2	5.84887	4.34448	1.20578	3.60304	0.000314515	0.00179094
2610204G07Rik	ENSMUSG00000084860.1	1.77333	4.33749	1.29317	3.35415	0.000796088	0.00403595
Gm16133	ENSMUSG00000089854.2	16.1685	4.32895	0.666209	6.49788	8.14577e-11	1.74795e-09
Gm12897	ENSMUSG00000083949.1	1.75591	4.32666	1.31252	3.29645	0.000979139	0.00483828
B930018H19Rik	ENSMUSG00000109819.1	10.0356	4.32141	0.818557	5.27931	1.29673e-07	1.61863e-06
Gm33677	ENSMUSG00000112778.1	1.73589	4.31357	1.35458	3.18444	0.00145034	0.00678508
5730419F03Rik	ENSMUSG00000099364.1	31.8889	4.29529	0.479964	8.94919	3.58111e-19	2.30534e-17
Tmem212	ENSMUSG00000043164.3	59.948	4.28115	0.36813	11.6295	2.91902e-31	5.35828e-29
Clca3a2	ENSMUSG00000028262.13	17.0852	4.27948	0.636378	6.72475	1.75898e-11	4.19172e-10
Casp14	ENSMUSG00000005355.9	1.69392	4.26573	1.30463	3.26968	0.0010767	0.00526011
Padi1	ENSMUSG00000025329.3	2929.8	4.26547	0.45692	9.33527	1.00732e-20	7.59177e-19
Trpc5	ENSMUSG00000041710.4	13.5646	4.2346	0.931093	4.54799	5.41612e-06	4.77484e-05
Krt84	ENSMUSG00000044294.8	2.50662	4.20537	1.19134	3.52996	0.000415627	0.00228318
Gm40916	ENSMUSG00000114355.1	5.46057	4.18892	0.955915	4.38211	1.17536e-05	9.49918e-05
Oxtr	ENSMUSG00000049112.9	457.59	4.18768	0.292414	14.3211	1.616e-46	8.3224e-44
Il1f8	ENSMUSG00000026985.1	14.1624	4.18508	0.843862	4.95944	7.06958e-07	7.55012e-06
Atf7ip2	ENSMUSG00000039200.16	14.3729	4.18121	0.613882	6.81111	9.68503e-12	2.443e-10
Gpa33	ENSMUSG00000000544.14	6.94417	4.17365	1.11892	3.73009	0.000191411	0.00115257
Prl2c5	ENSMUSG00000055360.13	3.66071	4.14519	1.19591	3.46615	0.000527969	0.00281766
Grem2	ENSMUSG00000050069.3	219.659	4.13562	0.222735	18.5674	5.89374e-77	1.561e-73
Clu	ENSMUSG00000022037.15	443.061	4.13489	0.348858	11.8527	2.08491e-32	4.49468e-30
Cntnap5b	ENSMUSG00000067028.11	35.2854	4.12703	0.498998	8.27064	1.3324e-16	6.31781e-15
Socs3	ENSMUSG00000053113.3	6.65657	4.11012	1.28697	3.19365	0.00140489	0.00659909
Apol7a	ENSMUSG00000010601.14	111.24	4.10797	0.565152	7.26879	3.62734e-13	1.1595e-11
Fos	ENSMUSG00000021250.13	117.457	4.09036	0.533055	7.67343	1.6746e-14	6.33615e-13
Tinag	ENSMUSG00000032357.12	223.608	4.08703	0.398831	10.2475	1.21421e-24	1.31646e-22
Cfi	ENSMUSG00000058952.12	32.028	4.08425	0.454409	8.98806	2.51639e-19	1.66028e-17
D730001G18Rik	ENSMUSG00000101026.1	3.49246	4.08086	1.20234	3.3941	0.000688534	0.00354595
Trank1	ENSMUSG00000062296.8	33.654	4.05591	0.742618	5.46164	4.71764e-08	6.34265e-07
Gm22000	ENSMUSG00000086932.1	14.9987	4.0458	0.620088	6.52456	6.8201e-11	1.47888e-09
Plekhg4	ENSMUSG00000014782.16	6.47659	4.03314	1.04336	3.86554	0.000110843	0.000706435
Gm40918	ENSMUSG00000114732.1	6.3108	4.02486	1.13939	3.53247	0.000411691	0.00226491
AA467197	ENSMUSG00000033213.16	68.0179	4.02295	1.1195	3.59353	0.000326224	0.00184621
4933402J15Rik	ENSMUSG00000115845.1	6.38495	4.02278	0.93617	4.29706	1.73081e-05	0.000133864
Gm36377	ENSMUSG00000113909.1	4.80435	4.01331	1.09872	3.65271	0.000259484	0.00151714
Togaram2	ENSMUSG00000045761.16	30.5755	3.99299	0.78357	5.09589	3.47099e-07	3.95527e-06
Gm35363	ENSMUSG00000110301.1	2.18848	3.99074	1.24027	3.21764	0.00129251	0.00615069
Unc5cl	ENSMUSG00000043592.15	1118.22	3.98	0.384431	10.353	4.05727e-25	4.64332e-23
Fam213a	ENSMUSG00000021792.15	5363.81	3.97919	0.230437	17.268	8.19164e-67	1.16825e-63
Gm40723	ENSMUSG00000112134.1	3.22762	3.97673	1.14549	3.47164	0.000517281	0.00276779
Il1b	ENSMUSG00000027398.13	69.824	3.95563	1.15128	3.43586	0.000590682	0.00310498
Mroh3	ENSMUSG00000087230.10	70.5123	3.94371	0.492379	8.0095	1.15176e-15	4.89764e-14
Itprid1	ENSMUSG00000037973.6	14.2055	3.94079	0.74469	5.29185	1.21085e-07	1.52094e-06
AL805899.2	ENSMUSG00000117251.1	3.12343	3.89719	1.16149	3.35533	0.000792701	0.00401988
Gm36120	ENSMUSG00000111820.1	20.0272	3.88491	1.19787	3.24318	0.00118203	0.00569512
Gm34068	ENSMUSG00000103305.1	13.4968	3.8834	0.922405	4.21008	2.55279e-05	0.000190228
Gm18857	ENSMUSG00000110055.1	6.13035	3.88091	0.985784	3.93688	8.25496e-05	0.000543105
Cftr	ENSMUSG00000041301.15	4796.91	3.87949	0.590288	6.5722	4.95785e-11	1.10082e-09
Kcnrg	ENSMUSG00000046168.9	3.05257	3.87481	1.19564	3.24079	0.00119198	0.00573084
Gm48427	ENSMUSG00000112234.1	8.86583	3.85493	0.864367	4.45983	8.20245e-06	6.90615e-05
Slc26a4	ENSMUSG00000020651.8	787.663	3.85185	0.442168	8.71129	3.0044e-18	1.71918e-16
Dusp4	ENSMUSG00000031530.6	8.67394	3.84826	0.74173	5.18823	2.12307e-07	2.54274e-06
Naip1	ENSMUSG00000021640.6	1919.3	3.84224	0.673726	5.70297	1.17736e-08	1.79066e-07
Bpifc	ENSMUSG00000050108.12	17.262	3.81239	0.586683	6.49821	8.12792e-11	1.74795e-09
Syt8	ENSMUSG00000031098.18	46.8855	3.81155	0.499543	7.63009	2.34597e-14	8.71631e-13
Grip1os3	ENSMUSG00000085454.1	30.4246	3.80627	0.671487	5.66842	1.44122e-08	2.14864e-07
Gm11149	ENSMUSG00000079564.3	13.4678	3.80559	0.846031	4.49816	6.85431e-06	5.88874e-05
Mab21l3	ENSMUSG00000044313.13	252.738	3.78311	0.523914	7.22085	5.16645e-13	1.60177e-11
Tarm1	ENSMUSG00000053338.9	27.8448	3.78055	0.916718	4.12401	3.72336e-05	0.000266941
Plekhs1	ENSMUSG00000035818.14	655.311	3.78047	0.256633	14.7311	4.07285e-49	2.51702e-46
Lncbate1	ENSMUSG00000110613.1	1.86424	3.75318	1.21159	3.09772	0.00195013	0.00876709
Gm12248	ENSMUSG00000086962.4	85.9005	3.75242	0.478205	7.8469	4.26445e-15	1.70762e-13
AC102496.1	ENSMUSG00000117465.1	389.95	3.7443	0.452275	8.27882	1.24401e-16	5.94431e-15
Serpinb1c	ENSMUSG00000079049.9	5.45719	3.73967	1.01652	3.6789	0.00023424	0.00138438
Scel	ENSMUSG00000022123.9	201.647	3.71227	0.601503	6.17166	6.75777e-10	1.25164e-08
A630031M04Rik	ENSMUSG00000087470.1	4.02691	3.68895	1.08669	3.39466	0.000687129	0.0035397
Adam28	ENSMUSG00000014725.16	292.731	3.68237	0.385872	9.54299	1.38774e-21	1.15895e-19
Ceacam1	ENSMUSG00000074272.10	4631.35	3.6693	0.198429	18.4918	2.4038e-76	5.57081e-73
Ubxn10	ENSMUSG00000043621.13	10.4349	3.65321	0.634716	5.75566	8.63054e-09	1.34012e-07
Slc26a7	ENSMUSG00000040569.13	64.5673	3.62404	0.345602	10.4862	9.99997e-26	1.21176e-23
Gm8439	ENSMUSG00000091297.1	72.7947	3.62259	0.399547	9.06676	1.22611e-19	8.35736e-18
4930556G22Rik	ENSMUSG00000101764.1	46.0151	3.60531	0.565865	6.37132	1.87404e-10	3.7766e-09
Kiss1	ENSMUSG00000116158.1	4.95349	3.60047	0.993201	3.62511	0.000288837	0.00166202
Slc39a4	ENSMUSG00000063354.7	61.8793	3.60012	0.383488	9.38783	6.12479e-21	4.77116e-19
Lrrc66	ENSMUSG00000067206.3	3.65546	3.58531	1.06222	3.37531	0.000737319	0.00376789
Nr6a1os	ENSMUSG00000085201.1	200.105	3.58016	0.365726	9.78917	1.25324e-22	1.15597e-20
Lemd1	ENSMUSG00000079330.8	24.9517	3.57119	0.920395	3.88006	0.000104431	0.000668101
Mmp11	ENSMUSG00000000901.17	1049.07	3.56296	0.277278	12.8498	8.62507e-38	2.71032e-35
Ccdc162	ENSMUSG00000075225.14	1701.22	3.56191	0.472888	7.53226	4.98685e-14	1.79179e-12
Fpr3	ENSMUSG00000079700.7	81.1893	3.55913	1.09513	3.24997	0.00115418	0.00558409
Atp10b	ENSMUSG00000055415.7	1477.17	3.55468	0.338392	10.5046	8.22654e-26	1.01007e-23
Csmd2	ENSMUSG00000028804.20	860.852	3.52982	0.365756	9.65075	4.87975e-22	4.2877e-20
A630023A22Rik	ENSMUSG00000095493.2	239.871	3.5245	0.307071	11.4778	1.70552e-30	2.92782e-28
Cpvl	ENSMUSG00000052955.5	21.0641	3.50799	0.620789	5.65085	1.59653e-08	2.36797e-07
Tspo2	ENSMUSG00000023995.12	7.09863	3.50613	0.837953	4.18417	2.86214e-05	0.00021099
Apoc2	ENSMUSG00000002992.17	8.37064	3.50547	0.936429	3.74344	0.000181516	0.00110049
Muc1	ENSMUSG00000042784.9	78.955	3.49689	0.296815	11.7814	4.86884e-32	9.81178e-30
Celsr2	ENSMUSG00000068740.13	39.2792	3.47393	0.473242	7.3407	2.12479e-13	7.00955e-12
Gm10701	ENSMUSG00000074465.2	1443.43	3.47024	0.328726	10.5566	4.73257e-26	6.00971e-24
Gm867	ENSMUSG00000050157.6	4.41547	3.46964	1.04246	3.32833	0.000873694	0.00438102
1700027A15Rik	ENSMUSG00000101968.6	23.7604	3.46551	0.511943	6.76932	1.29391e-11	3.17316e-10
B230303A05Rik	ENSMUSG00000113701.1	62.627	3.46424	0.509833	6.79486	1.08421e-11	2.71639e-10
B3galt5	ENSMUSG00000074892.9	72.8563	3.46121	0.398882	8.67727	4.05368e-18	2.29833e-16
Galnt13	ENSMUSG00000060988.12	5027.63	3.4487	0.387619	8.89714	5.73053e-19	3.61374e-17
Slc25a48	ENSMUSG00000021509.5	177.524	3.43817	0.500352	6.8715	6.35299e-12	1.6566e-10
Gm43057	ENSMUSG00000104937.1	224.102	3.43189	0.42368	8.10019	5.4874e-16	2.42229e-14
Gm12860	ENSMUSG00000086187.1	23.2308	3.43145	0.48436	7.08451	1.39538e-12	4.03593e-11
Clec4d	ENSMUSG00000030144.4	89.1495	3.40398	0.782135	4.35217	1.34796e-05	0.000107535
Htr2b	ENSMUSG00000026228.6	183.748	3.39309	0.254042	13.3564	1.08654e-40	4.1111e-38
Gm43305	ENSMUSG00000105703.2	168.355	3.39109	0.499292	6.7918	1.10743e-11	2.77082e-10
Cldn23	ENSMUSG00000055976.6	20.1577	3.38586	0.563342	6.0103	1.85179e-09	3.21764e-08
Alpl	ENSMUSG00000028766.10	132.072	3.37609	0.454362	7.4304	1.08271e-13	3.71731e-12
Sspn	ENSMUSG00000030255.13	835.057	3.35667	1.05291	3.18799	0.00143264	0.0067159
Gm10635	ENSMUSG00000111765.1	21.2386	3.33845	0.48081	6.9434	3.82775e-12	1.03299e-10
Sox7	ENSMUSG00000063060.6	45.4033	3.32223	0.396593	8.37693	5.43241e-17	2.70744e-15
Gm30613	ENSMUSG00000105300.1	616.574	3.30128	0.23858	13.8372	1.51985e-43	6.55301e-41
Fer1l6	ENSMUSG00000037106.8	9.46549	3.2867	0.827272	3.97293	7.09924e-05	0.000474991
Gm33782	ENSMUSG00000112290.1	22.5105	3.28428	0.521898	6.29295	3.11491e-10	6.06623e-09
Fermt1	ENSMUSG00000027356.8	808.229	3.28179	0.37168	8.8296	1.0505e-18	6.40668e-17
7420701I03Rik	ENSMUSG00000113620.1	16.7998	3.2812	0.781185	4.20029	2.66578e-05	0.000197537
Ren1	ENSMUSG00000070645.5	4.09238	3.2743	0.958657	3.41551	0.000636629	0.00331641
Gjb2	ENSMUSG00000046352.7	5.95111	3.26816	0.763676	4.27951	1.87307e-05	0.000143677
Lrrc55	ENSMUSG00000075224.9	29.7943	3.26153	0.747611	4.3626	1.28524e-05	0.00010305
Il1rn	ENSMUSG00000026981.15	37.5383	3.25936	0.666813	4.88797	1.01881e-06	1.04763e-05
Muc20	ENSMUSG00000035638.14	80.7105	3.22932	0.709474	4.55171	5.32125e-06	4.71361e-05
Serpine1	ENSMUSG00000037411.10	996.346	3.21351	0.294848	10.8989	1.1672e-27	1.67751e-25
Gm44275	ENSMUSG00000107768.1	9.49287	3.20908	0.803534	3.99371	6.50487e-05	0.000439185
Gm30414	ENSMUSG00000103067.1	138.588	3.20231	0.449204	7.12885	1.01214e-12	2.97385e-11
4930503B20Rik	ENSMUSG00000090202.1	3.75154	3.1888	0.940991	3.38877	0.000702078	0.00360868
Tnn	ENSMUSG00000026725.17	6.88149	3.18656	1.00443	3.17249	0.00151136	0.00703329
AC183097.1	ENSMUSG00000116719.1	21.1737	3.17671	0.410845	7.73214	1.0575e-14	4.1017e-13
Ltbp1	ENSMUSG00000001870.16	52549.8	3.16267	0.17831	17.7369	2.17658e-70	4.03539e-67
4930433N12Rik	ENSMUSG00000042360.12	12.9153	3.16265	0.587456	5.38364	7.29949e-08	9.51706e-07
Kcnh1	ENSMUSG00000058248.12	220.98	3.16113	0.200037	15.8027	2.97976e-56	2.6307e-53
S100g	ENSMUSG00000040808.4	22.1574	3.14239	0.590179	5.32447	1.01247e-07	1.29456e-06
4732490B19Rik	ENSMUSG00000085421.1	4.66336	3.14183	0.807945	3.88867	0.000100795	0.000647516
Lrrc2	ENSMUSG00000032495.8	5.36659	3.13057	1.00237	3.12318	0.0017891	0.0081476
AC165291.1	ENSMUSG00000117019.1	26.5309	3.12478	0.442688	7.05865	1.68131e-12	4.759e-11
Hmgcll1	ENSMUSG00000007908.14	1563.01	3.11243	0.162733	19.126	1.53317e-81	5.68499e-78
Gsto1	ENSMUSG00000025068.7	373.955	3.10771	0.263508	11.7936	4.21268e-32	8.77564e-30
1700027J07Rik	ENSMUSG00000111422.1	82.3208	3.10528	0.553767	5.60757	2.05191e-08	2.97297e-07
Ttc9	ENSMUSG00000042734.6	384.05	3.10314	0.187563	16.5445	1.75388e-61	2.0323e-58
AC183097.4	ENSMUSG00000116992.1	11.9054	3.09617	0.552397	5.60497	2.08287e-08	3.0122e-07
Odaph	ENSMUSG00000096035.2	8.99858	3.07908	0.600969	5.12353	2.99875e-07	3.46754e-06
Sftpd	ENSMUSG00000021795.10	125.385	3.07327	0.416551	7.37791	1.608e-13	5.41793e-12
Slc16a11	ENSMUSG00000040938.16	64.1417	3.07084	0.534697	5.74315	9.29338e-09	1.43583e-07
Plet1	ENSMUSG00000032068.14	365.788	3.06635	0.506604	6.05276	1.42388e-09	2.51416e-08
Tmprss7	ENSMUSG00000033177.13	42.1583	3.0649	0.512593	5.97921	2.24226e-09	3.8139e-08
Dgat2	ENSMUSG00000030747.5	497.446	3.0592	0.307767	9.93998	2.78883e-23	2.76496e-21
Gm4610	ENSMUSG00000104554.1	3.54479	3.05141	0.960356	3.17737	0.00148618	0.00693003
Rnf183	ENSMUSG00000063851.12	19.3299	3.04514	0.503855	6.04367	1.50648e-09	2.64991e-08
Ptprz1	ENSMUSG00000068748.7	6625.39	3.03612	0.336451	9.02398	1.8137e-19	1.21394e-17
Nmur2	ENSMUSG00000037393.2	81.8845	3.02893	0.377755	8.01825	1.07262e-15	4.5892e-14
AC167249.1	ENSMUSG00000116868.1	4.30067	3.0231	0.827359	3.65392	0.00025827	0.00151051
Kcnd3os	ENSMUSG00000074346.6	28.146	3.02131	0.407323	7.41749	1.19357e-13	4.07214e-12
Gm26569	ENSMUSG00000097313.2	75.3946	3.01277	0.325754	9.2486	2.27457e-20	1.66682e-18
Gm38403	ENSMUSG00000112854.1	20.7316	3.00951	0.415146	7.24927	4.19019e-13	1.32119e-11
BC030870	ENSMUSG00000074300.4	11.1344	3.00265	0.602005	4.98775	6.10877e-07	6.60388e-06
8030451A03Rik	ENSMUSG00000073821.11	47.6545	3.00177	0.410926	7.30489	2.77494e-13	9.01004e-12
Tnfrsf11b	ENSMUSG00000063727.3	1020.66	2.9984	0.261985	11.4449	2.49323e-30	4.16436e-28
Inhba	ENSMUSG00000041324.14	177.482	2.9925	0.351522	8.51299	1.695e-17	8.92764e-16
Mei4	ENSMUSG00000043289.12	24.3526	2.99242	0.445513	6.71679	1.85769e-11	4.41496e-10
Rgs1	ENSMUSG00000026358.13	1238.86	2.99029	0.38985	7.67035	1.71528e-14	6.47683e-13
2020-03-04	ENSMUSG00000039372.5	19.5859	2.98484	0.427613	6.98025	2.94659e-12	8.04563e-11
Tnr	ENSMUSG00000015829.13	31.4926	2.97964	0.407132	7.3186	2.50564e-13	8.19306e-12
F830045P16Rik	ENSMUSG00000043727.5	102.95	2.97476	0.288257	10.3198	5.73294e-25	6.48102e-23
Gm11685	ENSMUSG00000086733.1	5.05069	2.97231	0.868711	3.42151	0.000622734	0.00325592
Ccdc73	ENSMUSG00000045106.12	11.5019	2.9608	0.686761	4.31126	1.62328e-05	0.000126558
Lbh	ENSMUSG00000024063.13	1681.41	2.95518	0.157374	18.7781	1.14148e-78	3.52717e-75
Hgfac	ENSMUSG00000029102.9	193.336	2.95357	0.426644	6.92279	4.42835e-12	1.18473e-10
Gpr45	ENSMUSG00000041907.9	6.51857	2.94345	0.770452	3.82042	0.000133223	0.000836705
Gm43302	ENSMUSG00000079362.5	415.707	2.93448	0.943293	3.11089	0.00186523	0.00843654
Gm14040	ENSMUSG00000086637.1	82.8345	2.92966	0.300699	9.74281	1.98004e-22	1.79951e-20
Cemip	ENSMUSG00000052353.13	597.726	2.92687	0.443828	6.59462	4.26358e-11	9.6047e-10
Ass1	ENSMUSG00000076441.9	134.558	2.91453	0.359903	8.09808	5.58315e-16	2.45871e-14
Ctgf	ENSMUSG00000019997.11	189.545	2.9046	0.337085	8.61681	6.88466e-18	3.75416e-16
Gadd45b	ENSMUSG00000015312.9	9.13165	2.89804	0.74412	3.89459	9.83656e-05	0.000633889
Hbegf	ENSMUSG00000024486.5	43.399	2.89475	0.348141	8.31488	9.18437e-17	4.44591e-15
Dnase1l3	ENSMUSG00000025279.7	9.73029	2.89183	0.925888	3.1233	0.00178833	0.00814635
Slc23a4	ENSMUSG00000029847.13	337.778	2.87847	0.29063	9.90423	3.99023e-23	3.89363e-21
Gm26903	ENSMUSG00000097836.1	10.9791	2.87132	0.615438	4.66549	3.07882e-06	2.87998e-05
AU022754	ENSMUSG00000097209.2	11.0769	2.86528	0.82416	3.4766	0.000507816	0.00272501
Dyrk3	ENSMUSG00000016526.8	15.6908	2.85323	0.54937	5.19364	2.06222e-07	2.47466e-06
Nrg1	ENSMUSG00000062991.7	116431	2.84856	0.24549	11.6036	3.95128e-31	7.18203e-29
Ddit4l	ENSMUSG00000046818.7	34.4433	2.84375	0.413431	6.87842	6.05206e-12	1.58258e-10
Serinc2	ENSMUSG00000023232.17	541.101	2.83446	0.409287	6.92537	4.3484e-12	1.16671e-10
Gm20186	ENSMUSG00000106874.1	52.0877	2.82955	0.344977	8.20212	2.36177e-16	1.08116e-14
Gm44805	ENSMUSG00000109350.1	10.758	2.82596	0.777793	3.63331	0.000279811	0.00161812
Dlx5	ENSMUSG00000029755.10	34.9937	2.81957	0.414953	6.79491	1.08376e-11	2.71639e-10
Epcam	ENSMUSG00000045394.9	344.888	2.81955	0.398426	7.07672	1.47606e-12	4.2494e-11
Dclk3	ENSMUSG00000032500.10	61.2896	2.81775	0.785065	3.58919	0.000331709	0.00187447
Arhgef38	ENSMUSG00000040969.14	1641.7	2.81483	0.334302	8.42002	3.76409e-17	1.90673e-15
Cdh17	ENSMUSG00000028217.11	7.14745	2.8079	0.902006	3.11296	0.00185223	0.00839002
Mfsd4a	ENSMUSG00000059149.17	4500.58	2.80213	0.244194	11.475	1.76077e-30	2.99493e-28
Gm45145	ENSMUSG00000109076.1	14.3263	2.79903	0.907446	3.08451	0.00203886	0.00909979
Gprc5a	ENSMUSG00000046733.7	72.3641	2.79535	0.317806	8.79576	1.42088e-18	8.41631e-17
Fam3b	ENSMUSG00000022938.8	41.2402	2.79223	0.462503	6.03721	1.56801e-09	2.75292e-08
Rnf128	ENSMUSG00000031438.11	2472.04	2.78825	0.340372	8.19176	2.57432e-16	1.17556e-14
AC165271.1	ENSMUSG00000116641.1	53.0027	2.77325	0.354812	7.8161	5.44849e-15	2.17236e-13
Chchd10	ENSMUSG00000049422.7	5.39855	2.77089	0.785126	3.52923	0.000416778	0.00228882
Cd24a	ENSMUSG00000047139.9	168.915	2.76301	0.328137	8.4203	3.75528e-17	1.90673e-15
Macc1	ENSMUSG00000041886.7	1596.88	2.76129	0.341918	8.07589	6.6989e-16	2.9223e-14
Clmn	ENSMUSG00000021097.15	2314.51	2.75938	0.639413	4.31548	1.59254e-05	0.000124319
Dusp10	ENSMUSG00000039384.8	363.44	2.75531	0.218393	12.6163	1.71738e-36	5.054e-34
AC183097.2	ENSMUSG00000116812.1	35.313	2.75211	0.316685	8.69035	3.61311e-18	2.05482e-16
4930519L02Rik	ENSMUSG00000105652.1	4.46288	2.75132	0.847508	3.24637	0.00116887	0.0056449
Slc34a2	ENSMUSG00000029188.14	182.956	2.74915	0.566442	4.85336	1.21387e-06	1.22711e-05
Kng1	ENSMUSG00000022875.18	43.2857	2.72461	0.448229	6.07861	1.21226e-09	2.16734e-08
Grip1	ENSMUSG00000034813.17	22193.3	2.723	0.43015	6.33036	2.44596e-10	4.83455e-09
Msc	ENSMUSG00000025930.6	55.9985	2.71787	0.387904	7.00656	2.44255e-12	6.77918e-11
Gm20547	ENSMUSG00000092511.7	766.783	2.71526	0.822259	3.3022	0.000959299	0.004758
Myb	ENSMUSG00000019982.15	751.031	2.69691	0.44083	6.11779	9.48835e-10	1.71666e-08
4833423E24Rik	ENSMUSG00000075217.1	118.835	2.69227	0.272733	9.87144	5.53635e-23	5.31834e-21
Rassf6	ENSMUSG00000029370.10	198.176	2.69114	0.480789	5.59733	2.17676e-08	3.14063e-07
Slc6a14	ENSMUSG00000031089.7	19.9682	2.67096	0.633351	4.21718	2.47375e-05	0.000184933
Atf3	ENSMUSG00000026628.13	987.784	2.66629	0.408902	6.52062	7.00182e-11	1.51475e-09
Adamdec1	ENSMUSG00000022057.8	5.56462	2.66136	0.821221	3.24073	0.00119222	0.00573084
Efna4	ENSMUSG00000028040.7	14.1785	2.65601	0.539659	4.92165	8.58189e-07	8.96385e-06
Il1a	ENSMUSG00000027399.1	101.922	2.65256	0.512336	5.17738	2.25025e-07	2.67949e-06
1700086L19Rik	ENSMUSG00000071265.10	6.54519	2.65058	0.864528	3.06593	0.00216995	0.00959201
Gm47499	ENSMUSG00000110923.1	77.1646	2.64706	0.357065	7.41337	1.23129e-13	4.18866e-12
Scin	ENSMUSG00000002565.16	534.794	2.64639	0.395311	6.69445	2.16482e-11	5.08048e-10
3830432H09Rik	ENSMUSG00000101731.1	9.69843	2.64541	0.714156	3.70425	0.000212016	0.00126351
Sgcg	ENSMUSG00000035296.14	65.0759	2.64279	0.465559	5.67659	1.37408e-08	2.06446e-07
Rmst	ENSMUSG00000112117.1	1995.32	2.64269	0.392526	6.73251	1.66755e-11	3.99437e-10
Cfb	ENSMUSG00000090231.10	671.342	2.642	0.775107	3.40856	0.000653062	0.00339248
Krt19	ENSMUSG00000020911.14	460.875	2.62149	0.410324	6.38884	1.67153e-10	3.3832e-09
Slc44a4	ENSMUSG00000007034.15	248.5	2.61811	0.384194	6.81454	9.45685e-12	2.39195e-10
Gm17171	ENSMUSG00000091457.1	189.613	2.61566	0.813916	3.21367	0.00131051	0.00622038
1700016P03Rik	ENSMUSG00000085609.1	13.5769	2.61551	0.505496	5.17414	2.28963e-07	2.71418e-06
Trim6	ENSMUSG00000072244.11	207.091	2.61454	0.305486	8.55865	1.14202e-17	6.0842e-16
Gm39214	ENSMUSG00000109754.1	24.7413	2.61313	0.528628	4.94322	7.68427e-07	8.11774e-06
Cers3	ENSMUSG00000030510.11	104.432	2.60919	0.479017	5.44697	5.12357e-08	6.86351e-07
Cfap161	ENSMUSG00000011154.17	27.4763	2.60526	0.464305	5.6111	2.01046e-08	2.92431e-07
Sytl3	ENSMUSG00000041831.16	593.942	2.60262	0.211986	12.2773	1.1993e-34	2.96467e-32
Tmc1	ENSMUSG00000024749.8	11.5438	2.60146	0.503445	5.16732	2.37473e-07	2.80251e-06
Erich3	ENSMUSG00000078161.8	99.4113	2.60077	0.492507	5.28069	1.28698e-07	1.60786e-06
Nr4a3	ENSMUSG00000028341.9	402.802	2.59359	0.305935	8.47759	2.29909e-17	1.19398e-15
Spag6l	ENSMUSG00000022783.11	19.757	2.58959	0.614674	4.21294	2.5207e-05	0.000188063
Gm30873	ENSMUSG00000109341.1	5.2362	2.58635	0.731587	3.53527	0.000407364	0.0022431
Gm45304	ENSMUSG00000110329.1	17.6324	2.57912	0.5752	4.48388	7.32992e-06	6.25387e-05
Slc37a1	ENSMUSG00000024036.15	478.071	2.5769	0.287845	8.95238	3.47891e-19	2.24735e-17
Plat	ENSMUSG00000031538.6	863.426	2.5656	0.142023	18.0646	6.05086e-73	1.24648e-69
Krt8	ENSMUSG00000049382.10	93.8059	2.56127	0.363907	7.03827	1.94644e-12	5.48436e-11
Adm	ENSMUSG00000030790.15	8.16573	2.55136	0.712745	3.57962	0.000344092	0.00193669
Gja1	ENSMUSG00000050953.10	11165.7	2.54192	0.256186	9.92216	3.33451e-23	3.28839e-21
Adgrg5	ENSMUSG00000061577.12	26.8273	2.5414	0.820686	3.09667	0.00195705	0.00879394
Gm28818	ENSMUSG00000101211.1	7.6892	2.53688	0.762197	3.32838	0.000873541	0.00438102
Ldhd	ENSMUSG00000031958.16	41.2023	2.5287	0.392886	6.43623	1.22481e-10	2.56009e-09
Filip1l	ENSMUSG00000043336.14	6285.56	2.52818	0.571135	4.42659	9.57339e-06	7.90957e-05
Gm8075	ENSMUSG00000113321.1	6.94942	2.52241	0.762517	3.30801	0.000939624	0.00467417
Has1	ENSMUSG00000003665.7	119.305	2.51305	0.413111	6.08325	1.17773e-09	2.11171e-08
Parvaos	ENSMUSG00000085049.1	8.91064	2.51247	0.54957	4.5717	4.83775e-06	4.33294e-05
Rgs4	ENSMUSG00000038530.11	125.254	2.50934	0.27077	9.26742	1.90702e-20	1.40861e-18
Cblc	ENSMUSG00000040525.13	250.975	2.50897	0.563775	4.4503	8.5749e-06	7.17089e-05
E030013I19Rik	ENSMUSG00000086843.3	148.739	2.50279	0.343488	7.28641	3.1833e-13	1.02819e-11
Snhg7os	ENSMUSG00000086775.7	11.4022	2.49732	0.802508	3.11189	0.00185893	0.00841831
Wfdc8	ENSMUSG00000070533.11	32.2152	2.49563	0.683598	3.65073	0.000261497	0.00152794
Fosb	ENSMUSG00000003545.3	98.6089	2.4946	0.589595	4.23104	2.32615e-05	0.000174744
Slco4a1	ENSMUSG00000038963.15	808.589	2.49321	0.503613	4.95064	7.39689e-07	7.85893e-06
Tmprss11g	ENSMUSG00000079451.9	106.913	2.49263	0.403276	6.18095	6.37188e-10	1.18371e-08
Aoc1	ENSMUSG00000029811.14	21.5587	2.49208	0.587816	4.23955	2.23972e-05	0.000168867
Pigr	ENSMUSG00000026417.13	367.889	2.48947	0.503595	4.9434	7.67716e-07	8.11485e-06
Inhbb	ENSMUSG00000037035.5	155.827	2.48569	0.316548	7.85249	4.07868e-15	1.64747e-13
Noxo1	ENSMUSG00000019320.14	98.0074	2.48559	0.51788	4.79954	1.5903e-06	1.56747e-05
Map3k7cl	ENSMUSG00000025610.7	169.577	2.48469	0.334983	7.41735	1.19484e-13	4.07214e-12
Galnt3	ENSMUSG00000026994.9	236.773	2.48117	0.302974	8.18941	2.62514e-16	1.1929e-14
Plch1	ENSMUSG00000036834.16	11881.6	2.47512	0.29746	8.32086	8.73297e-17	4.24959e-15
Tmem45b	ENSMUSG00000041737.8	1137.27	2.47472	0.403959	6.12618	9.0014e-10	1.63453e-08
Cldn7	ENSMUSG00000018569.12	384.472	2.47059	0.380678	6.48996	8.58596e-11	1.8318e-09
Mal2	ENSMUSG00000024479.3	267.356	2.46828	0.378924	6.51393	7.32098e-11	1.58195e-09
Fer1l4	ENSMUSG00000013338.16	126.232	2.45858	0.445221	5.52216	3.34851e-08	4.60886e-07
Aloxe3	ENSMUSG00000020892.10	23.5823	2.45703	0.465416	5.27922	1.29734e-07	1.61863e-06
Vmn1r39	ENSMUSG00000093755.2	28.4119	2.44266	0.540278	4.52111	6.15149e-06	5.34687e-05
Gm44698	ENSMUSG00000109366.1	6.65198	2.44097	0.640256	3.81249	0.000137572	0.000861393
Gm45397	ENSMUSG00000109973.1	76.5897	2.42704	0.268928	9.02487	1.79906e-19	1.2085e-17
4933417E11Rik	ENSMUSG00000101848.1	69.6621	2.4256	0.491547	4.93463	8.03046e-07	8.43062e-06
Kcnc2	ENSMUSG00000035681.7	9709.55	2.42474	0.407394	5.95182	2.6518e-09	4.44123e-08
Tnip3	ENSMUSG00000044162.12	486.029	2.42409	0.787084	3.07983	0.00207119	0.00921964
Bhlhe40	ENSMUSG00000030103.11	158.198	2.42173	0.237537	10.1952	2.08315e-24	2.20694e-22
Doc2b	ENSMUSG00000020848.7	5.96705	2.41311	0.672054	3.59065	0.000329861	0.00186565
Tjp3	ENSMUSG00000034917.8	283.25	2.40936	0.410303	5.87216	4.30165e-09	6.97749e-08
Enpp3	ENSMUSG00000019989.8	1585.94	2.40756	0.221653	10.8619	1.75137e-27	2.45988e-25
Dsp	ENSMUSG00000054889.10	469.176	2.40719	0.391087	6.15513	7.50146e-10	1.37973e-08
Gm13986	ENSMUSG00000087203.7	481.611	2.40424	0.205968	11.6729	1.75364e-31	3.3176e-29
Megf11	ENSMUSG00000036466.17	370.829	2.40056	0.340041	7.05962	1.66959e-12	4.74032e-11
Bdnf	ENSMUSG00000048482.14	1794.84	2.38812	0.350517	6.81312	9.55049e-12	2.41234e-10
Tenm1	ENSMUSG00000016150.15	222.88	2.38535	0.384782	6.19923	5.67406e-10	1.05939e-08
Ildr1	ENSMUSG00000022900.14	783.056	2.38385	0.669673	3.55972	0.000371247	0.00206686
A230108P19Rik	ENSMUSG00000087125.1	12.3533	2.37913	0.566689	4.19831	2.6892e-05	0.000199192
F5	ENSMUSG00000026579.8	63.8058	2.36386	0.384378	6.14984	7.75625e-10	1.42236e-08
Add2	ENSMUSG00000030000.10	333.981	2.34894	0.29918	7.85126	4.11879e-15	1.66005e-13
Cilp	ENSMUSG00000042254.14	61.5951	2.34501	0.420049	5.5827	2.36813e-08	3.38774e-07
Gm21847	ENSMUSG00000094230.5	309.323	2.34214	0.288956	8.10554	5.25123e-16	2.32913e-14
Dennd2d	ENSMUSG00000027901.12	227.758	2.33534	0.2347	9.95033	2.51344e-23	2.50533e-21
Gm43391	ENSMUSG00000106004.4	161.305	2.32698	0.352433	6.60261	4.03986e-11	9.13402e-10
Inava	ENSMUSG00000041605.16	296.338	2.3266	0.431938	5.38643	7.18705e-08	9.38366e-07
Nr4a1	ENSMUSG00000023034.7	309.059	2.32631	0.217723	10.6847	1.1999e-26	1.58902e-24
Cpm	ENSMUSG00000020183.11	269.368	2.32049	0.435098	5.33327	9.64614e-08	1.23781e-06
Gm26799	ENSMUSG00000097579.1	53.708	2.31781	0.267291	8.67147	4.26573e-18	2.38378e-16
Gm15283	ENSMUSG00000087700.2	58.2907	2.31588	0.432716	5.35197	8.70032e-08	1.12407e-06
Krt7	ENSMUSG00000023039.17	2030.32	2.30841	0.406268	5.68198	1.33147e-08	2.01022e-07
Gadd45g	ENSMUSG00000021453.2	147.49	2.30049	0.304729	7.5493	4.37617e-14	1.59399e-12
Lrp8	ENSMUSG00000028613.14	442.495	2.2988	0.186095	12.3528	4.70178e-35	1.21071e-32
Cyp26b1	ENSMUSG00000063415.12	104.777	2.2912	0.63591	3.60303	0.000314525	0.00179094
Lrrc36	ENSMUSG00000054320.16	910.949	2.28155	0.486819	4.68665	2.77709e-06	2.62422e-05
Cdh1	ENSMUSG00000000303.12	1545.39	2.2736	0.394366	5.76519	8.1568e-09	1.2751e-07
Tmeff1	ENSMUSG00000028347.14	741.866	2.27114	0.148751	15.268	1.24927e-52	9.65058e-50
4930430E12Rik	ENSMUSG00000085295.7	24.6559	2.27108	0.73063	3.10839	0.00188112	0.00849598
Gm45716	ENSMUSG00000110344.1	67.6005	2.26283	0.244326	9.26153	2.01525e-20	1.48265e-18
Rspo2	ENSMUSG00000051920.7	10.4203	2.25583	0.570768	3.95227	7.74147e-05	0.000512413
Dsg2	ENSMUSG00000044393.15	454.02	2.2535	0.407113	5.53532	3.10668e-08	4.31445e-07
Ppm1j	ENSMUSG00000002228.7	14.6568	2.25315	0.430556	5.2331	1.66687e-07	2.03717e-06
Gm34829	ENSMUSG00000111610.1	7.42048	2.25196	0.735385	3.06229	0.00219651	0.009695
Megf10	ENSMUSG00000024593.15	15.67	2.24929	0.633332	3.55152	0.000383017	0.00212291
Urah	ENSMUSG00000025481.12	81.1959	2.24877	0.414364	5.42703	5.72989e-08	7.60431e-07
Mex3a	ENSMUSG00000074480.4	8.69675	2.24738	0.50754	4.42799	9.51175e-06	7.86214e-05
Bcas1	ENSMUSG00000013523.13	24.2606	2.24233	0.69821	3.21154	0.00132024	0.00625859
6430562O15Rik	ENSMUSG00000097828.2	26.2659	2.24007	0.313723	7.14027	9.31492e-13	2.75436e-11
Fcgbp	ENSMUSG00000047730.17	74.5806	2.23957	0.405779	5.51918	3.40594e-08	4.6775e-07
Mpzl2	ENSMUSG00000032092.5	39.1666	2.2388	0.389238	5.75175	8.83221e-09	1.368e-07
Gm40614	ENSMUSG00000085451.2	7.70831	2.23791	0.688161	3.25201	0.00114592	0.00555143
Speer4cos	ENSMUSG00000089871.1	55.5527	2.23524	0.427429	5.2295	1.69972e-07	2.07049e-06
AL805899.1	ENSMUSG00000117123.1	594.134	2.22781	0.379486	5.87059	4.34247e-09	7.03753e-08
Gck	ENSMUSG00000041798.15	46.768	2.22508	0.449477	4.95037	7.40724e-07	7.86542e-06
Ephx4	ENSMUSG00000033805.12	184.351	2.21436	0.392338	5.64401	1.66133e-08	2.45623e-07
Fam135b	ENSMUSG00000036800.8	261.396	2.20525	0.512363	4.30409	1.67675e-05	0.000130399
Gm42788	ENSMUSG00000107388.1	8.32535	2.20299	0.555199	3.96793	7.24982e-05	0.000484716
Ankrd37	ENSMUSG00000050914.16	50.6328	2.20099	0.392098	5.61335	1.98445e-08	2.89243e-07
Tmem200a	ENSMUSG00000049420.9	2754.16	2.19063	0.252637	8.67105	4.28143e-18	2.38378e-16
Lad1	ENSMUSG00000041782.14	90.4874	2.1857	0.523338	4.17646	2.96082e-05	0.000217832
Fank1	ENSMUSG00000053111.13	91.3421	2.18153	0.39221	5.56213	2.66496e-08	3.7774e-07
Nts	ENSMUSG00000019890.4	6.52623	2.1795	0.671163	3.24736	0.00116483	0.00562833
Col12a1	ENSMUSG00000032332.17	8078.66	2.17874	0.232638	9.36534	7.58044e-21	5.88039e-19
Sectm1a	ENSMUSG00000025165.12	78.8343	2.17806	0.697399	3.12311	0.00178948	0.0081476
Pmepa1	ENSMUSG00000038400.15	5139.85	2.17541	0.12454	17.4676	2.52862e-68	3.90672e-65
Cdcp1	ENSMUSG00000035498.10	976.928	2.17279	0.366289	5.9319	2.99443e-09	4.95684e-08
0610040J01Rik	ENSMUSG00000060512.7	1718.49	2.17046	0.207618	10.4541	1.40357e-25	1.66809e-23
2010300C02Rik	ENSMUSG00000026090.16	901.437	2.16679	0.440611	4.91768	8.75737e-07	9.13684e-06
Wwc1	ENSMUSG00000018849.6	2760.45	2.16307	0.597278	3.62155	0.000292839	0.00168192
Wdr72	ENSMUSG00000044976.17	1461.13	2.16196	0.288667	7.48944	6.91686e-14	2.44264e-12
Ifi47	ENSMUSG00000078920.3	431.854	2.16191	0.550045	3.93043	8.47939e-05	0.000555701
A230001M10Rik	ENSMUSG00000105891.4	7.66616	2.15915	0.594796	3.63007	0.00028334	0.00163424
Tnfaip3	ENSMUSG00000019850.11	385.665	2.15892	0.538288	4.01072	6.05338e-05	0.000412457
Mannr	ENSMUSG00000102590.1	325.236	2.15798	0.249085	8.66364	4.56953e-18	2.5365e-16
Slc16a3	ENSMUSG00000025161.16	215.338	2.15506	0.506211	4.25724	2.06967e-05	0.000157281
Tnfsf10	ENSMUSG00000039304.11	1429.14	2.15502	0.299931	7.18505	6.71833e-13	2.03194e-11
Arid5a	ENSMUSG00000037447.16	1905.99	2.14398	0.146989	14.586	3.44916e-48	1.99836e-45
Spns2	ENSMUSG00000040447.15	3650.28	2.14293	0.235046	9.11705	7.71963e-20	5.34037e-18
Far2os2	ENSMUSG00000086777.3	19.7819	2.14292	0.386823	5.53979	3.02836e-08	4.21515e-07
Ppp1r14c	ENSMUSG00000040653.6	188.007	2.13941	0.458339	4.66774	3.04525e-06	2.85146e-05
Nfe2l3	ENSMUSG00000029832.16	195.218	2.13924	0.480287	4.45409	8.42508e-06	7.06153e-05
Smtnl2	ENSMUSG00000045667.14	137.117	2.13754	0.464832	4.59853	4.25488e-06	3.86125e-05
Sh2d6	ENSMUSG00000052631.15	45.0289	2.13263	0.524238	4.06806	4.74068e-05	0.000329678
Tmie	ENSMUSG00000049555.10	20.4309	2.1313	0.472928	4.50661	6.58723e-06	5.68298e-05
Mecomos	ENSMUSG00000085702.8	6.21013	2.12917	0.615296	3.46039	0.000539388	0.00286622
Trpm6	ENSMUSG00000024727.8	1699.82	2.12377	0.36548	5.8109	6.21393e-09	9.92301e-08
Pard3bos3	ENSMUSG00000085400.1	67.1191	2.121	0.306341	6.92367	4.4009e-12	1.17909e-10
Mmp12	ENSMUSG00000049723.14	25.3684	2.1197	0.614433	3.44984	0.000560915	0.00296616
Car2	ENSMUSG00000027562.12	172.441	2.11729	0.251128	8.43115	3.42281e-17	1.74818e-15
Hrasls	ENSMUSG00000022525.13	8.04278	2.11305	0.688049	3.07107	0.00213292	0.00945359
6430571L13Rik	ENSMUSG00000037977.6	11.3294	2.10955	0.576699	3.65797	0.000254216	0.00148868
Dlx6	ENSMUSG00000029754.13	19.7065	2.10781	0.619957	3.39993	0.000674022	0.00348379
E230016K23Rik	ENSMUSG00000051832.7	31.6346	2.10501	0.321293	6.55168	5.68939e-11	1.24978e-09
Sncaip	ENSMUSG00000024534.15	16572.6	2.10451	0.228129	9.2251	2.83298e-20	2.05974e-18
Epb41l4b	ENSMUSG00000028434.12	1550.45	2.10306	0.394231	5.3346	9.57545e-08	1.23028e-06
Mtus2	ENSMUSG00000029651.16	277.083	2.0968	0.222572	9.42074	4.47901e-21	3.61048e-19
Chrdl2	ENSMUSG00000030732.13	245.775	2.09621	0.350228	5.98528	2.16017e-09	3.6844e-08
Ano4	ENSMUSG00000035189.16	5082.65	2.09161	0.310099	6.74496	1.53072e-11	3.68566e-10
Olfr56	ENSMUSG00000040328.15	3478.59	2.08	0.643197	3.23384	0.00122137	0.00585043
Nol4	ENSMUSG00000041923.15	41.572	2.07521	0.375757	5.52275	3.33734e-08	4.60031e-07
Cpe	ENSMUSG00000037852.8	681.474	2.06842	0.159002	13.0088	1.09052e-38	3.61041e-36
Wfdc2	ENSMUSG00000017723.11	1493.25	2.06785	0.418162	4.94509	7.61095e-07	8.05909e-06
Gpr176	ENSMUSG00000040133.2	163.728	2.05744	0.313428	6.56431	5.22744e-11	1.15334e-09
Gm38139	ENSMUSG00000103204.1	13.2937	2.04052	0.651637	3.13137	0.00173993	0.00796306
P2ry2	ENSMUSG00000032860.5	117.242	2.03581	0.341273	5.96533	2.44139e-09	4.11112e-08
Rgs16	ENSMUSG00000026475.7	16.4173	2.03475	0.50054	4.06512	4.80075e-05	0.000332981
Il23r	ENSMUSG00000049093.9	43.6769	2.0331	0.290764	6.99227	2.70483e-12	7.42925e-11
Lamb3	ENSMUSG00000026639.18	481.486	2.03059	0.243025	8.35546	6.51801e-17	3.2129e-15
2010001K21Rik	ENSMUSG00000051606.5	81.0065	2.02849	0.267375	7.5867	3.28155e-14	1.21195e-12
Reep6	ENSMUSG00000035504.16	14.9086	2.02619	0.636008	3.1858	0.00144356	0.00676018
2810408A11Rik	ENSMUSG00000018570.17	19.2092	2.02155	0.607153	3.32956	0.000869847	0.00436572
Ikzf3	ENSMUSG00000018168.8	270.011	2.02117	0.283063	7.14035	9.30915e-13	2.75436e-11
Lrriq1	ENSMUSG00000019892.13	70.0846	2.01987	0.391395	5.1607	2.46032e-07	2.89065e-06
Serpina1e	ENSMUSG00000072849.10	112.481	2.01776	0.371473	5.43178	5.57937e-08	7.41516e-07
Pkhd1	ENSMUSG00000043760.16	2648.62	2.01532	0.453007	4.44876	8.63692e-06	7.2195e-05
Fam167a	ENSMUSG00000035095.11	8.571	2.01254	0.617434	3.25952	0.00111601	0.00542495
Ccdc192	ENSMUSG00000058925.11	79.2809	2.01146	0.247439	8.12913	4.32399e-16	1.92709e-14
Fam83b	ENSMUSG00000032358.12	76.0039	2.01138	0.282389	7.12271	1.05826e-12	3.10444e-11
Dlx6os2	ENSMUSG00000094868.1	10.0684	2.00683	0.630663	3.18209	0.00146215	0.00683519
Tgfbi	ENSMUSG00000035493.10	1251.55	2.00142	0.24064	8.31706	9.01722e-17	4.37642e-15
