# Supplementary material for: The pregnant myometrium is epigenetically activated at contractility-driving gene loci prior to the onset of labor in mice
Source: PLoS Biol. 2020 Jul 15;18(7):e3000710. doi: 10.1371/journal.pbio.3000710 (PMC7384763; doi:10.1371/journal.pbio.3000710)
Supplement: S7 Data — H3K4me3, H3 trimethylation of lysine residue 4. (XLSX) [file pbio.3000710.s015.xlsx]

## Sheet: K4me3_norm_input_UP_genes_corr1
Probe	Chromosome	Start	End	Probe Strand	K4me3_D15	K4me3_TNIL	K4me3_LAB	K4me3_1PP
Gm30414_upstream	1	7495968	7499968	+	1.02429	0.786944	0.921209	0.916462
Msc_upstream	1	14753992	14757992	-	3.11694	3.67109	3.296	5.77926
Pkhd1_upstream	1	20616064	20620064	-	1.06398	1.66357	1.03352	1.61029
Arid5a_upstream	1	36305733	36309733	+	4.98434	5.72487	7.08157	6.78669
2010300C02Rik_upstream	1	37718085	37722085	-	4.72605	6.0053	3.76767	5.27534
Gpr45_upstream	1	42950872	42954872	+	1.54954	2.24306	2.07618	2.59804
Pard3bos3_upstream	1	62497261	62501261	-	1.60947	1.25041	1.32068	0.958176
Gm28818_upstream	1	71915125	71919125	-	0.810683	0.773273	0.828656	0.843177
4933417E11Rik_upstream	1	72003195	72007195	-	0.646511	0.963556	0.949106	0.739008
4930556G22Rik_upstream	1	72036731	72040731	-	0.631138	0.900373	0.554947	0.83374
March4_upstream	1	72534930	72538930	-	0.765656	1.04819	0.988091	0.870317
1700027A15Rik_upstream	1	72982844	72986844	+	0.758758	1.15123	0.712576	0.528497
Ptprn_upstream	1	75262502	75266502	-	0.704489	1.19725	0.996068	0.541454
5730419F03Rik_upstream	1	78607508	78611508	-	0.830051	1.06519	1.18643	0.73951
Nyap2_upstream	1	81074950	81078950	+	0.827171	0.605187	0.940995	0.901043
Slc16a14_upstream	1	84933134	84937134	-	3.79344	4.25581	4.06068	3.98654
Htr2b_upstream	1	86109970	86113970	-	1.32741	1.97037	1.28155	1.11762
Nppc_upstream	1	86668571	86672571	-	2.37687	2.10292	2.50459	3.54258
Glrp1_upstream	1	88508066	88512066	-	0.5392	0.644619	0.787367	1.08898
2310007B03Rik_upstream	1	93158948	93162948	-	0.264371	0.30225	0.75216	0.453178
Pdcd1_upstream	1	94050553	94054553	-	0.509018	0.458674	0.408282	0.586719
Cntnap5b_upstream	1	99770765	99774765	+	0.924463	1.19701	0.880277	0.83374
Inhbb_upstream	1	119420248	119424248	-	8.06916	6.7042	7.81779	7.8148
3830432H09Rik_upstream	1	119534165	119538165	-	0.527853	0.481349	0.444367	0.607308
Pigr_upstream	1	130824684	130828684	+	0.99199	1.2034	1.38885	0.678984
Il24_upstream	1	130885454	130889454	-	0.530602	0.641729	0.83102	0.633084
Dyrk3_upstream	1	131136340	131140340	-	8.29683	9.13233	5.92453	7.53689
Mfsd4a_upstream	1	132066062	132070062	-	2.18125	1.81456	2.69351	2.96456
Lemd1_upstream	1	132189431	132193431	+	1.63936	1.6697	1.58416	2.24351
Golt1a_upstream	1	133307800	133311800	+	0.39642	0.455845	0.569819	0.65189
Gm28040_upstream	1	133307827	133311827	+	0.39642	0.441439	0.569819	0.639845
Kiss1_upstream	1	133319875	133323875	+	0.317497	0.286641	0.448892	0.443362
Ren1_upstream	1	133348510	133352510	+	0.35709	0.302907	0.518877	0.508473
Elf3_upstream	1	135256568	135260568	-	0.76741	1.66835	1.93298	1.51599
Lad1_upstream	1	135816598	135820598	+	1.2913	2.30773	1.69671	1.66498
Mroh3_upstream	1	136210828	136214828	-	0.415344	0.42391	0.533601	0.489329
Inava_upstream	1	136232264	136236264	-	3.39524	2.87667	2.52066	3.09124
Rgs1_upstream	1	144247242	144251242	-	4.20807	4.681	1.68316	3.25543
Ptgs2_upstream	1	150098031	150102031	+	2.97458	4.71997	2.77307	4.43882
Rgs16_upstream	1	153738349	153742349	+	1.89981	2.31342	2.02375	2.04243
Tnr_upstream	1	159521769	159525769	+	0.448983	0.777435	0.794241	0.633084
Tnn_upstream	1	160151580	160155580	-	0.633794	0.496279	0.602464	0.663383
F5_upstream	1	164149838	164153838	+	0.651515	1.66024	1.03735	1.16318
Gpa33_upstream	1	166128238	166132238	+	0.510921	0.324304	0.569787	0.612722
Rgs4_upstream	1	169745642	169749642	-	2.76567	2.88554	2.23861	1.92799
Gm7804_upstream	1	172456569	172460569	+	0.612253	0.605841	0.759488	0.438774
Ifi202b_upstream	1	173980744	173984744	-	0.804836	0.707007	0.76581	0.871428
Grem2_upstream	1	174919819	174923819	-	1.45853	1.37787	1.47899	1.72303
1700016C15Rik_upstream	1	177727814	177731814	+	0.675739	0.878782	0.754473	0.560245
Gm34068_upstream	1	183746977	183750977	+	0.730026	0.682712	0.770896	0.788991
Dusp10_upstream	1	184011302	184015302	+	0.588252	0.666681	0.846857	0.725755
Atf3_upstream	1	191216039	191220039	-	0.665192	0.827641	1.06121	0.876099
Kcnh1_upstream	1	192188774	192192774	+	1.2674	1.58452	1.49589	1.46334
Lamb3_upstream	1	193205699	193209699	+	0.869795	0.737822	0.514042	0.585457
A230108P19Rik_upstream	2	6191251	6195251	+	0.404037	0.415644	0.616151	0.529777
E030013I19Rik_upstream	2	12298946	12302946	+	6.8414	5.11403	4.36128	5.23102
Malrd1_upstream	2	15524479	15528479	+	1.34871	1.33625	1.51836	1.43413
Gm17171_upstream	2	20322670	20326670	-	0.907562	1.28204	0.85468	0.914802
Tbpl2_upstream	2	24094595	24098595	-	0.83907	0.691247	0.949314	0.700237
Il1f8_upstream	2	24151161	24155161	+	0.934615	1.23339	0.980049	1.31478
Il1f9_upstream	2	24184476	24188476	+	1.40182	0.950525	1.24012	0.976745
Il1f6_upstream	2	24213418	24217418	+	0.885325	0.894532	0.966313	0.803627
Il1rn_upstream	2	24334853	24338853	+	0.521322	0.691247	1.11779	0.691503
Entpd8_upstream	2	25078304	25082304	+	0.46726	0.415644	0.569755	0.450277
Noxa1_upstream	2	25093149	25097149	-	0.620104	0.416309	0.977328	0.556216
Snhg7os_upstream	2	26638372	26642372	+	6.34761	4.28899	4.01673	5.80592
Ass1_upstream	2	31468207	31472207	+	2.19473	1.70339	2.13645	2.44574
Lcn2_upstream	2	32386252	32390252	-	0.581262	0.554308	1.37949	1.05477
Nr6a1os_upstream	2	38821257	38825257	+	8.39512	6.10066	4.38055	4.15139
Galnt13_upstream	2	54434317	54438317	+	1.60014	1.49227	2.52635	2.14333
Itgb6_upstream	2	60720643	60724643	-	0.714496	0.864207	0.570093	0.640022
Galnt3_upstream	2	66122994	66126994	-	6.58129	7.03139	7.93583	8.92225
Scn9a_upstream	2	66632962	66636962	-	0.670017	1.27394	1.01627	1.21249
Myo3b_upstream	2	70037126	70041126	+	0.484396	0.688674	0.653202	0.755495
Lrrc55_upstream	2	85195197	85199197	-	0.509701	0.420839	0.9701	0.784055
4833423E24Rik_upstream	2	85517024	85521024	-	1.0804	1.14673	1.18087	1.13728
Ccdc73_upstream	2	104865805	104869805	+	0.612253	0.62718	0.585643	0.655914
Bdnf_upstream	2	109672700	109676700	+	1.13574	1.05087	0.936625	0.991457
4930412B13Rik_upstream	2	117819928	117823928	+	0.75803	1.18231	1.13873	0.569267
Gm13986_upstream	2	118109202	118113202	-	4.09595	3.81805	3.97757	4.85577
Thbs1_upstream	2	118109876	118113876	+	4.75224	4.03835	4.7801	6.20287
Gpr176_upstream	2	118371419	118375419	-	4.42689	4.51828	4.02241	4.80877
AA467197_upstream	2	122634986	122638986	+	1.41106	1.67741	1.31808	1.44954
Il1a_upstream	2	129307972	129311972	-	0.948865	1.89329	1.26266	1.16549
Il1b_upstream	2	129369139	129373139	-	0.620861	0.653171	0.715803	0.517283
Gm14040_upstream	2	129513807	129517807	-	0.776148	0.759228	1.16721	0.565753
F830045P16Rik_upstream	2	129534602	129538602	-	0.459185	0.375552	0.537518	0.639913
Fermt1_upstream	2	132943906	132947906	-	1.21066	1.43732	1.88654	1.92732
Fer1l4_upstream	2	156050947	156054947	-	0.511214	0.656159	0.788149	0.842123
Ghrh_upstream	2	157345506	157349506	-	0.542766	0.336826	0.436964	0.541454
Wfdc2_upstream	2	164560413	164564413	+	1.33105	1.43176	1.71757	1.69047
Wfdc8_upstream	2	164611626	164615626	-	0.336279	0.407694	0.768119	0.490783
Bcas1os2_upstream	2	170354361	170358361	+	0.549871	0.408634	0.708756	0.599989
Bcas1_upstream	2	170425845	170429845	-	0.397138	0.432329	0.610924	0.487812
Pmepa1_upstream	2	173274533	173278533	-	6.79536	6.51999	8.30823	10.6476
Slco4a1_upstream	2	180454245	180458245	+	2.29981	3.10935	2.50858	2.22831
Car2_upstream	3	14884273	14888273	+	7.49822	6.66463	5.50269	5.84292
Tnfsf10_upstream	3	27315028	27319028	+	4.4075	3.96933	3.49578	3.80193
Tmem212_upstream	3	27894368	27898368	-	0.378231	0.413471	0.630274	0.77562
Mannr_upstream	3	29889014	29893014	+	1.82911	2.26943	2.23516	1.85799
Mecomos_upstream	3	30010379	30014379	+	3.91695	3.53115	3.39511	3.65484
Gm43821_upstream	3	38128191	38132191	-	0.762393	0.769651	1.22293	0.582948
Mindy4b-ps_upstream	3	58820311	58824311	-	1.16822	1.20072	1.08776	1.1011
Plch1_upstream	3	63897472	63901472	-	4.85888	5.64253	5.33619	6.16668
Bglap3_upstream	3	88370743	88374743	-	0.932925	0.373254	0.555627	0.644115
Mex3a_upstream	3	88530395	88534395	+	6.95828	6.0678	6.01476	7.2506
Muc1_upstream	3	89227057	89231057	+	1.51792	1.56536	2.43595	2.52334
Efna4_upstream	3	89336028	89340028	-	4.15035	2.68982	3.42009	4.2772
Sprr2f_upstream	3	92363187	92367187	+	0.869746	1.23835	1.0779	1.15717
Mab21l3_upstream	3	101846959	101850959	-	0.72625	0.603346	0.846232	0.541809
A230001M10Rik_upstream	3	102260405	102264405	+	0.452257	0.501282	0.750671	0.59168
Bcl2l15_upstream	3	103830601	103834601	+	1.09035	0.972396	1.11707	0.918508
Ppm1j_upstream	3	104779056	104783056	+	3.02428	2.8607	2.6857	3.27846
Kcnd3os_upstream	3	105450955	105454955	-	3.09994	3.00386	3.3222	4.13538
Chil6_upstream	3	106404182	106408182	-	1.30033	1.04825	0.990464	1.19523
Dennd2d_upstream	3	106480405	106484405	+	5.76451	5.7069	3.73621	5.44784
Celsr2_upstream	3	108413552	108417552	-	1.95553	2.70363	3.24128	2.89603
Gm4610_upstream	3	122389811	122393811	-	0.568357	0.758073	0.70409	0.527242
Cfi_upstream	3	129833884	129837884	+	1.04375	0.902142	0.983007	1.28228
Arhgef38_upstream	3	133232949	133236949	-	0.90099	1.92021	1.58327	1.8823
Ddit4l_upstream	3	137619612	137623612	+	0.963669	1.14703	1.46033	1.2818
Gbp2b_upstream	3	142592847	142596847	+	1.0757	1.61609	0.77218	0.774719
4930519L02Rik_upstream	3	143015660	143019660	+	0.928888	0.972796	0.875126	0.659881
Clca3a2_upstream	3	144817494	144821494	-	0.821144	1.0935	0.949885	0.829817
Clca3b_upstream	3	144847357	144851357	-	0.623795	0.709605	0.903709	0.758161
Clca1_upstream	3	145030776	145034776	-	0.777077	0.727058	0.765109	0.576196
Uox_upstream	3	146568426	146572426	+	0.609457	0.686128	0.611647	0.702935
4930503B20Rik_upstream	3	146649317	146653317	-	0.663335	0.653702	0.535677	0.560111
Gm38139_upstream	3	154654701	154658701	+	0.412841	0.377586	0.486999	0.472128
Erich3_upstream	3	154661859	154665859	+	0.859349	0.772779	1.01945	1.16205
4930430E12Rik_upstream	4	6355530	6359530	-	1.13023	1.18681	1.06287	1.01795
Cdh17_upstream	4	11756147	11760147	+	0.757225	1.24679	1.00276	0.804921
Slc26a7_upstream	4	14619805	14623805	-	2.56002	2.69442	2.59035	1.9124
Nr4a3_upstream	4	48043153	48047153	+	9.87476	8.99255	11.1388	11.0539
Tmeff1_upstream	4	48583174	48587174	+	6.20572	5.27875	5.36196	8.5741
Epb41l4b_upstream	4	57141437	57145437	-	3.63984	3.48846	5.27961	4.30935
Rnf183_upstream	4	62433252	62437252	-	0.570406	0.574978	0.955346	1.06794
8030451A03Rik_upstream	4	63977854	63981854	+	0.704489	0.728637	0.791191	0.606361
Tnc_upstream	4	64045015	64049015	-	2.38043	2.19534	2.68559	3.04964
AL805899.1_upstream	4	88936521	88940521	-	3.44498	4.14343	3.08091	4.44311
AL805899.2_upstream	4	89037192	89041192	-	0.641818	0.972796	1.11247	0.936489
Lrp8_upstream	4	107800261	107804261	+	4.38087	4.88067	4.77491	5.33417
Tspan1_upstream	4	116165601	116169601	-	0.663335	1.0391	0.948553	0.852528
Gm8439_upstream	4	120586745	120590745	+	0.598377	0.517171	0.755613	0.560111
Gm12860_upstream	4	120613840	120617840	+	0.303433	0.411157	0.676311	0.448316
Gm12897_upstream	4	122185748	122189748	+	1.13039	1.02872	1.14179	1
A630031M04Rik_upstream	4	127543101	127547101	+	0.379457	0.517763	0.831213	0.535535
Csmd2_upstream	4	127985857	127989857	+	0.627701	0.571086	1.44897	1.13319
Tmem54_upstream	4	129103548	129107548	+	0.616615	0.603686	0.602762	0.731796
Serinc2_upstream	4	130277205	130281205	-	0.320177	0.395221	0.513608	0.69181
Alpl_upstream	4	137794384	137798384	-	0.783963	0.671584	1.07476	0.975235
Ubxn10_upstream	4	138735167	138739167	-	0.396201	0.322878	0.537518	0.3812
Padi3_upstream	4	140808648	140812648	-	0.292251	0.271881	0.529019	0.488659
Padi1_upstream	4	140843778	140847778	-	0.548973	0.661272	1.30343	1.22775
Gm43391_upstream	5	15462171	15466171	+	1.19664	0.731386	0.680354	0.767304
Gm21847_upstream	5	15514489	15518489	+	1.04032	0.907039	1.04008	0.757253
Gm30613_upstream	5	15603066	15607066	-	1.01248	0.972796	0.670687	0.958044
Speer4cos_upstream	5	15678710	15682710	+	0.706446	0.798158	0.687389	0.593083
Galntl5_upstream	5	25179460	25183460	+	0.492589	0.46341	0.606106	0.554072
Il6_upstream	5	30011114	30015114	+	1.7189	1.57397	1.0247	1.14204
Hgfac_upstream	5	35039509	35043509	+	0.522832	0.311951	0.697719	0.685416
Gm15866_upstream	5	43599731	43603731	-	0.948786	1.73552	0.825393	1.50098
Slc34a2_upstream	5	53036081	53040081	+	0.613279	0.844605	0.87598	0.45913
0610040J01Rik_upstream	5	63810363	63814363	+	3.71977	5.56968	3.52664	4.54309
Lrrc66_upstream	5	73630526	73634526	-	0.857655	0.860557	0.775417	1.04492
Tmprss11d_upstream	5	86371420	86375420	-	1.60222	1.13489	1.17592	1.56077
Tmprss11g_upstream	5	86516600	86520600	-	1.52785	1.08016	1.37158	1.30922
Tmprss11b_upstream	5	86674362	86678362	-	1.70356	1.48398	1.24762	1.03324
Gm43057_upstream	5	86781033	86785033	-	0.895115	1.15469	0.904508	1.66224
Sult1e1_upstream	5	87589594	87593594	-	1.21151	1.41211	1.35325	1.2132
Rassf6_upstream	5	90638657	90642657	-	1.00832	1.29608	1.23854	1.31729
Cxcl2_upstream	5	90901871	90905871	+	0.86697	1.11054	1.13801	1.3548
Odaph_upstream	5	91985475	91989475	+	0.713391	0.937079	0.835703	0.794751
Gm43302_upstream	5	105291695	105295695	-	1.96819	2.17251	1.46821	1.80991
Ephx4_upstream	5	107400736	107404736	+	3.71452	6.24662	3.79911	4.60283
Serpine1_upstream	5	137070268	137074268	-	1.00014	0.847062	1.37513	1.95059
Gper1_upstream	5	139421151	139425151	+	0.840207	0.423356	0.941391	0.787358
Mtus2_upstream	5	147955320	147959320	+	1.64069	1.60356	1.72586	2.27024
Gm42788_upstream	5	149142263	149146263	+	0.784475	0.745353	1.22323	0.736133
Gm43150_upstream	5	149426962	149430962	-	0.587746	0.79177	0.785583	0.446075
Dlx6_upstream	6	6861334	6865334	+	1.51638	1.91076	2.61943	2.3851
Dlx6os2_upstream	6	6863150	6867150	-	2.00987	2.11287	2.69978	2.22134
Dlx5_upstream	6	6880085	6884085	-	1.31424	1.74094	1.387	1.72129
Cftr_upstream	6	18168687	18172687	+	1.99881	1.83536	1.87672	2.07282
Gm20186_upstream	6	18846207	18850207	-	9.11732	6.73038	6.00484	9.44595
Ptprz1_upstream	6	22873502	22877502	+	3.35383	2.70518	2.90493	3.39808
Slc23a4_upstream	6	34986404	34990404	-	0.457231	0.400242	0.580862	0.947122
Trpv6_upstream	6	41634405	41638405	-	0.733603	0.91851	1.8955	1.25921
Aoc1_upstream	6	48870896	48874896	+	0.52478	0.559092	0.768119	0.511587
Nfe2l3_upstream	6	51430670	51434670	+	2.55294	3.09281	2.34469	2.61545
Cpvl_upstream	6	53976671	53980671	-	1.14337	0.939353	0.805814	0.83374
Itprid1_upstream	6	55834895	55838895	+	0.530333	0.608885	0.784481	0.571558
Tnip3_upstream	6	65523313	65527313	+	1.22447	1.24526	0.794016	0.914802
Vmn1r39_upstream	6	66808609	66812609	-	1.141	1.6868	1.22059	1.65194
Il23r_upstream	6	67489855	67493855	-	1.19202	0.920387	1.08521	0.625473
Sh2d6_upstream	6	72519707	72523707	-	0.525376	0.471736	0.681092	0.671755
2310069B03Rik_upstream	6	82879853	82883853	-	0.638307	0.54869	0.817734	0.576087
Gm45145_upstream	6	82903214	82907214	-	0.50702	0.418729	0.754912	0.64379
Cyp26b1_upstream	6	84591908	84595908	-	0.329838	0.377484	0.558396	0.41708
Add2_upstream	6	86026681	86030681	+	1.21276	1.78603	1.4785	1.63629
Gm1965_upstream	6	89138994	89142994	+	0.642113	0.469476	0.662384	0.725755
Wnt7a_upstream	6	91409363	91413363	-	0.774925	0.924356	1.96071	1.22988
Bhlhe40_upstream	6	108658629	108662629	+	6.9927	6.13158	6.46873	8.65385
Oxtr_upstream	6	112487943	112491943	-	3.60833	3.07835	4.2717	8.54571
Gm26799_upstream	6	112694777	112698777	+	6.99538	6.60903	4.24075	8.62045
Mkrn2os_upstream	6	115590576	115594576	-	0.833865	0.573123	0.903248	0.782035
Clec4d_upstream	6	123260111	123264111	+	1.46284	1.01031	1.39738	1.37809
Clec4e_upstream	6	123287870	123291870	-	1.32741	0.911775	1.42278	1.43489
Gm10415_upstream	6	126326686	126330686	-	0.636846	0.897877	1.05157	0.813772
Clec2e_upstream	6	129098913	129102913	-	1.58926	1.30706	1.73725	1.43413
Kap_upstream	6	133851762	133855762	-	0.637655	0.780147	0.995915	0.689751
Gprc5a_upstream	6	135063651	135067651	+	1.99063	1.89213	1.86224	2.69985
Gm44275_upstream	6	135317561	135321561	-	0.431651	0.52702	0.854092	0.471721
Sspn_upstream	6	145929641	145933641	+	0.416784	0.430803	0.942866	0.538791
Far2os2_upstream	6	148045339	148049339	-	0.924002	1.23717	1.24491	0.986762
Speer9-ps1_upstream	7	3126146	3130146	+	1.26783	0.710265	0.814293	0.729995
Tarm1_upstream	7	3500624	3504624	-	0.855194	1.02926	1.04817	0.940732
Ptprh_upstream	7	4602041	4606041	-	0.588252	0.605595	0.722459	0.59236
Fosb_upstream	7	19308051	19312051	-	8.94519	6.90526	6.3885	8.88214
Gm44698_upstream	7	19331129	19335129	+	2.1452	2.40051	2.58945	2.25944
Apoc2_upstream	7	19675941	19679941	-	0.420526	0.353549	0.788611	0.509046
Gm44805_upstream	7	19679423	19683423	-	0.52004	0.39165	0.667053	0.430726
Cblc_upstream	7	19794809	19798809	-	0.998238	1.20825	1.51641	1.61047
Cxcl17_upstream	7	25410886	25414886	-	0.561209	1.40617	1.04113	1.13683
Ceacam1_upstream	7	25475603	25479603	-	1.11911	1.06834	1.51668	1.74045
Fcgbp_upstream	7	28069236	28073236	+	0.433801	0.519715	0.794636	0.543516
LOC102637012_upstream	7	47072687	47076687	-	0.402359	0.441457	0.627742	0.457759
Cers3_upstream	7	66741504	66745504	+	0.452458	0.452454	0.748884	0.731581
Cfap161_upstream	7	83792880	83796880	-	0.486779	0.55106	0.776486	0.636608
Cemip_upstream	7	84084502	84088502	-	0.94075	1.06996	1.93039	1.18905
Gm30873_upstream	7	84336095	84340095	+	0.586898	0.701294	0.68668	0.666497
Gm2115_upstream	7	84526954	84530954	+	1.37663	1.81312	1.46049	1.2865
Dgat2_upstream	7	99180719	99184719	-	3.32005	4.71062	2.60308	3.36963
Gm45012_upstream	7	99200366	99204366	+	0.309942	0.402494	0.569543	0.54565
Chrdl2_upstream	7	100004172	100008172	+	1.44402	0.910416	1.7735	1.76953
P2ry2_upstream	7	101010866	101014866	-	2.88903	2.43662	2.16357	2.29321
Gm35363_upstream	7	101536330	101540330	-	1.65737	1.90253	1.68801	1.61745
Trim6_upstream	7	104216793	104220793	+	3.46329	2.3917	2.32413	2.78906
Gm20663_upstream	7	105899568	105903568	+	1	1	1	1
Adm_upstream	7	110625661	110629661	+	5.64419	4.86134	5.61466	8.32249
Parvaos_upstream	7	112533683	112537683	-	0.736008	0.74125	0.680905	0.662675
Fank1_upstream	7	133774861	133778861	+	6.5913	8.33735	4.26758	6.8551
Gm45397_upstream	7	137562588	137566588	-	1.37988	1.22715	1.06528	1.05409
Kndc1_upstream	7	139892696	139896696	+	0.540965	0.568703	0.977328	1.02727
Urah_upstream	7	140833018	140837018	+	0.567898	0.765519	1.13783	0.910318
Syt8_upstream	7	142432850	142436850	+	0.394753	0.416309	0.50416	0.610831
Plat_upstream	8	22755727	22759727	+	2.49438	3.20221	2.36209	2.88211
Gm45304_upstream	8	31661828	31665828	-	1.14337	1.05565	0.808813	0.811451
Nrg1_upstream	8	32882029	32886029	-	1.48962	1.92716	2.07567	1.88387
B930018H19Rik_upstream	8	34638316	34642316	-	0.690114	0.684231	0.878681	0.71238
Dusp4_upstream	8	34805297	34809297	+	5.25826	4.36829	7.76815	8.50658
Cldn23_upstream	8	35824559	35828559	-	3.49602	3.88876	4.0984	5.5206
Ankrd37_upstream	8	46003707	46007707	-	1.04952	1.17412	1.06034	0.909073
5330439A09Rik_upstream	8	54598987	54602987	-	1.36935	1.59092	1.32068	1.97746
Cpe_upstream	8	64691054	64695054	-	4.1385	3.65475	3.39511	4.09233
BC030870_upstream	8	65127563	65131563	-	0.517082	0.847297	0.724856	0.881483
Frem3_upstream	8	80609080	80613080	+	0.519729	0.448091	0.804475	0.462871
Gm39214_upstream	8	85728816	85732816	+	1.26783	1.25041	1.02085	1.39907
Slc12a3_upstream	8	94327201	94331201	+	0.322951	0.336826	0.716435	0.480309
Adgrg5_upstream	8	94921694	94925694	+	0.59122	0.585154	0.683514	0.561579
Plekhg4_upstream	8	105371274	105375274	+	0.544191	0.453305	0.770186	0.808777
Lrrc36_upstream	8	105411571	105415571	+	1.16433	1.49141	0.954612	1.20606
Cdh1_upstream	8	106601351	106605351	+	1.62569	1.95908	2.59822	2.26317
Lncbate1_upstream	8	108582595	108586595	-	0.859411	0.716716	0.722459	0.585457
Ldhd_upstream	8	111628374	111632374	-	1.30564	1.4957	1.48294	1.8223
Hsd17b2_upstream	8	117699904	117703904	+	0.425458	0.427038	0.613387	0.639828
4930433N12Rik_upstream	9	3197799	3201799	-	0.74241	0.952409	1.43234	0.81419
Mmp12_upstream	9	7342381	7346381	+	0.925283	1.49248	1.05762	0.828055
Mmp7_upstream	9	7690090	7694090	+	0.646726	1.00777	1.10748	0.986762
Gm15600_upstream	9	24298257	24302257	-	0.548687	0.537238	0.631688	0.753741
Gm10701_upstream	9	24339657	24343657	+	1.59285	2.96724	1.52639	1.88627
Tmem45b_upstream	9	31462462	31466462	-	0.765656	1.27653	1.52513	1.62799
Mpzl2_upstream	9	45037799	45041799	+	0.728783	0.718015	1.03812	0.762544
Gm11149_upstream	9	49516288	49520288	+	0.42877	0.290563	0.549957	0.512701
Plet1_upstream	9	50492525	50496525	+	0.849073	1.33847	1.90146	1.21891
Ccdc33_upstream	9	58116823	58120823	-	0.525682	0.376134	0.791191	0.713492
Megf11_upstream	9	64383626	64387626	+	1.25719	1.69534	1.8128	1.5436
Cilp_upstream	9	65263180	65267180	+	0.459164	0.485351	0.979441	0.799403
Wdr72_upstream	9	74108356	74112356	+	0.957699	1.92986	1.3623	1.67589
Hmgcll1_upstream	9	76012855	76016855	+	1.33811	1.60996	1.51241	2.21877
Gm26903_upstream	9	76013192	76017192	-	1.39994	1.64366	1.48824	2.15374
Fam83b_upstream	9	76565116	76569116	-	1.67327	1.55114	2.35904	1.61173
Tinag_upstream	9	77043794	77047794	-	1.25229	2.03683	1.13912	1.30204
Gm34829_upstream	9	77990599	77994599	+	0.535312	0.46188	0.532849	0.733683
Gm47499_upstream	9	79200007	79204007	-	1.00188	1.34024	1.16277	0.806368
Gm10635_upstream	9	79517302	79521302	-	0.671974	0.96009	0.82274	0.665669
Col12a1_upstream	9	79716831	79720831	-	4.67276	2.96799	3.02746	3.61079
Mei4_upstream	9	81861670	81865670	+	2.63442	3.46937	3.26813	2.73268
Gm36120_upstream	9	83685525	83689525	-	0.844982	0.702439	0.832295	0.82213
C430002N11Rik_upstream	9	96763562	96767562	+	0.945775	0.80591	1.00472	0.944582
6430571L13Rik_upstream	9	107338602	107342602	+	2.53672	3.2387	2.05344	2.61482
Tmie_upstream	9	110878113	110882113	-	3.71827	2.89132	3.39092	4.11083
Lrrc2_upstream	9	110949545	110953545	+	0.789528	0.775836	0.675666	0.597542
Ltf_upstream	9	111017271	111021271	+	0.395793	0.369424	0.811535	0.686778
Trank1_upstream	9	111309739	111313739	+	2.23573	2.29056	3.07476	2.59693
Dclk3_upstream	9	111437081	111441081	+	0.687077	1.45511	1.45578	0.950096
Cdcp1_upstream	9	123214038	123218038	-	0.897887	1.14364	1.29279	1.33099
H60c_upstream	10	3265771	3269771	-	0.562147	0.692001	1.0974	0.667614
Ppp1r14c_upstream	10	3364057	3368057	+	2.77167	4.52252	2.77716	2.81583
Tnfaip3_upstream	10	19013657	19017657	-	9.20501	6.57091	4.23	7.83787
Myb_upstream	10	21158984	21162984	-	6.64115	9.33463	7.26846	8.67042
Gm40614_upstream	10	24130480	24134480	-	1.41875	1.93477	0.982024	1.14612
Ctgf_upstream	10	24593442	24597442	+	5.89466	5.28669	4.44224	6.48876
Enpp3_upstream	10	24840823	24844823	-	0.77691	0.980828	1.02118	0.719622
Arg1_upstream	10	24925484	24929484	-	1.13741	1.13671	1.15307	1.26212
Tmem200a_upstream	10	26077052	26081052	-	5.82288	6.91804	4.21055	7.7293
Ccdc162_upstream	10	41714634	41718634	-	0.744851	0.832445	1.30422	1.09564
Cd24a_upstream	10	43576284	43580284	+	3.66912	3.82619	3.67687	6.03049
1700027J07Rik_upstream	10	43743809	43747809	+	0.525682	0.579849	0.557305	0.566476
Gja1_upstream	10	56375330	56379330	+	11.7828	11.1429	6.86074	9.54266
Gm48053_upstream	10	56912765	56916765	-	1.10955	1.16377	0.769821	1.28413
Ddit4_upstream	10	59949834	59953834	-	6.74484	5.53816	5.10237	7.43886
Chchd10_upstream	10	75931130	75935130	+	2.2312	2.22292	2.26162	3.96567
Mmp11_upstream	10	75934496	75938496	-	1.57824	2.20565	2.27377	2.68567
Gm867_upstream	10	75938672	75942672	-	0.513374	0.35202	0.509433	0.567397
Casp14_upstream	10	78716294	78720294	-	0.745555	0.623977	0.943256	1.07762
Reep6_upstream	10	80327953	80331953	+	1.10596	0.881182	1.2593	1.28917
Gadd45b_upstream	10	80928073	80932073	+	6.04019	6.25315	5.23595	8.28583
Tjp3_upstream	10	81289581	81293581	-	3.08512	3.73647	3.23262	4.76174
Gm40723_upstream	10	83342513	83346513	+	0.609457	0.894112	0.669523	0.750281
Bpifc_upstream	10	86009895	86013895	-	0.925787	0.894532	0.904508	0.558304
Ano4_upstream	10	89342762	89346762	-	1.75413	1.61768	1.53416	1.87696
Rmst_upstream	10	92163170	92167170	-	1.58118	2.11682	0.853932	0.779287
4930459C07Rik_upstream	10	96224020	96228020	+	1.0178	1.33554	0.845446	0.83904
Gm48427_upstream	10	96307345	96311345	+	0.953655	0.773145	0.737493	0.639934
Gm33782_upstream	10	96308131	96312131	+	1.01066	0.87819	0.85468	0.610989
Nts_upstream	10	102488486	102492486	-	1.24609	1.27929	1.19957	1.09025
Lrriq1_upstream	10	103234322	103238322	-	2.48755	3.51084	2.4054	2.92034
Kcnc2_upstream	10	112269121	112273121	+	3.25909	3.2414	3.14459	2.56051
Cpm_upstream	10	117627500	117631500	+	2.7949	5.11254	3.55839	4.27319
Gm38403_upstream	10	118925143	118929143	-	0.866579	1.12241	1.00472	0.863049
Gm33677_upstream	10	119048499	119052499	-	0.890015	0.87819	0.91146	0.742745
Grip1_upstream	10	119451830	119455830	+	3.04694	3.83623	3.20769	3.15219
Grip1os3_upstream	10	119453379	119457379	-	3.20019	4.21535	3.22034	4.29086
Gck_upstream	11	5948081	5952081	-	0.51696	0.598059	0.442232	0.758563
Wwc1_upstream	11	35978527	35982527	-	2.38137	3.92412	4.76184	2.82446
Atp10b_upstream	11	43147877	43151877	+	1.49089	1.35723	1.25255	0.573526
Olfr56_upstream	11	48976889	48980889	+	1.78234	1.3434	1.27229	1.39244
Ifi47_upstream	11	49074587	49078587	+	1.43245	1.52804	1.05157	1.17504
Nmur2_upstream	11	56039010	56043010	-	0.842125	0.78114	1.02142	1.43739
Gm12248_upstream	11	58091134	58095134	-	1.57888	1.8966	1.26793	1.94091
Myh2_upstream	11	67169027	67173027	+	0.524025	0.800482	1.02502	0.679778
Aloxe3_upstream	11	69123896	69127896	+	5.34788	4.44163	4.17568	4.99426
2810408A11Rik_upstream	11	69898987	69902987	-	5.68608	6.48319	4.07634	8.37838
Cldn7_upstream	11	69962779	69966779	+	1.54143	2.07483	1.9162	2.03323
Slc16a11_upstream	11	70210752	70214752	+	1.02779	1.41223	1.34799	1.02638
Alox12e_upstream	11	70320628	70324628	-	0.433985	0.388956	0.810201	0.839258
Alox15_upstream	11	70350031	70354031	-	0.850888	0.721715	1.21031	0.851853
Smtnl2_upstream	11	72409713	72413713	-	2.48986	2.20598	2.45044	2.70285
Spns2_upstream	11	72487904	72491904	-	4.32241	4.92469	5.06296	5.26755
1700016P03Rik_upstream	11	75170560	75174560	+	3.794	4.1898	3.85672	4.18411
Doc2b_upstream	11	75794049	75798049	-	1.43821	1.13748	1.98369	1.85177
E230016K23Rik_upstream	11	83580056	83584056	+	0.544983	0.894983	0.624136	0.82417
Gm45716_upstream	11	90185683	90189683	+	0.962661	0.526195	0.828656	0.72733
Ikzf3_upstream	11	98544031	98548031	-	2.91507	2.64359	3.05738	2.37745
Krt20_upstream	11	99436150	99440150	-	0.627437	0.501282	0.603833	0.95869
Krt19_upstream	11	100146665	100150665	-	0.81949	0.584241	0.860573	0.690457
Gm22000_upstream	11	104563661	104567661	-	0.606173	0.484257	0.70474	0.457662
E030025P04Rik_upstream	11	109142369	109146369	-	0.571838	0.451012	0.989227	0.623039
Gm11685_upstream	11	109614320	109618320	+	0.931241	0.660622	0.825697	1.01488
4732490B19Rik_upstream	11	113207669	113211669	-	0.745581	0.7495	0.898069	0.650513
Btbd17_upstream	11	114793945	114797945	-	0.716356	0.468563	0.831839	0.572003
Socs3_upstream	11	117968047	117972047	-	6.62516	5.25276	4.95863	7.07174
Slc16a3_upstream	11	120946480	120950480	+	2.88496	2.19587	3.16983	3.00912
Sectm1a_upstream	11	121079220	121083220	-	0.634879	0.661136	0.628302	0.574513
7420701I03Rik_upstream	12	11045813	11049813	+	1.03844	1.13124	1.24762	1.02918
Slc26a4_upstream	12	31557969	31561969	-	2.17318	2.86379	3.09585	2.93045
Scin_upstream	12	40132228	40136228	-	3.17863	3.06206	2.81404	3.20676
Gm8075_upstream	12	73791483	73795483	+	0.618366	0.564346	0.871955	0.728488
Gm15283_upstream	12	73947814	73951814	-	1.44807	1.93477	1.47559	1.68402
Syt16_upstream	12	73995661	73999661	+	0.979487	1.4746	1.74967	1.36532
1700086L19Rik_upstream	12	74282242	74286242	+	1.57969	2.10113	1.84781	2.02687
Ttc9_upstream	12	81629249	81633249	+	2.39248	3.77377	3.43231	4.06939
Gm29530_upstream	12	83096874	83100874	-	0.471631	0.784877	0.894906	0.681869
Gm40477_upstream	12	85434249	85438249	-	0.651846	0.494454	0.992796	0.799403
Fos_upstream	12	85471890	85475890	+	8.62926	6.48612	7.33585	12.2727
Oog1_upstream	12	87600688	87604688	+	0.648307	0.799246	0.769011	0.705608
Dio2_upstream	12	90736438	90740438	-	4.097	3.92774	3.48248	7.89243
Serpina1e_upstream	12	103956975	103960975	-	0.700186	1.00409	0.690694	0.767493
Serpina9_upstream	12	104011755	104015755	-	0.433801	0.527299	0.580862	0.671778
Clmn_upstream	12	104863076	104867076	-	2.37053	2.32908	2.93146	2.40384
Macc1_upstream	12	119312270	119316270	+	1.39784	1.66365	0.991144	1.04185
Gm18857_upstream	13	4033245	4037245	+	1.14435	1.10545	1.19097	1.25904
Prl2c2_upstream	13	13003383	13007383	-	0.751461	1.10641	1.18155	1.17664
Prl2c5_upstream	13	13180715	13184715	+	1.02176	0.956761	1.22059	0.73951
Inhba_upstream	13	16009851	16013851	+	3.75855	3.30312	2.9325	4.30805
B230303A05Rik_upstream	13	16021423	16025423	-	0.910857	0.761133	0.983521	0.942601
Prl8a6_upstream	13	27436688	27440688	-	1.04032	1.37617	1.36768	1.12591
Prl7b1_upstream	13	27608582	27612582	-	1.07282	1.18345	1.61444	1.39244
Prl2a1_upstream	13	27799654	27803654	+	1.39784	1.12165	1.17855	1.14007
Serpinb1c_upstream	13	32896211	32900211	-	0.642113	0.386625	0.508734	0.436916
Gm47754_upstream	13	37579077	37583077	+	1.00121	0.859008	1.02446	1.21043
Gm40915_upstream	13	37625603	37629603	-	0.402668	0.422318	0.668662	0.58005
Gm40916_upstream	13	37646236	37650236	-	0.704489	0.621759	0.680905	0.44779
AI463229_upstream	13	37665734	37669734	-	0.663335	0.570553	0.916381	0.719623
Gm40918_upstream	13	37715648	37719648	-	0.387739	0.674741	0.436929	0.421743
Dsp_upstream	13	38149294	38153294	+	1.36009	2.89219	2.66882	2.61545
Gm26877_upstream	13	41357971	41361971	+	7.25961	6.51878	4.5576	6.23286
2010001K21Rik_upstream	13	46977908	46981908	+	0.736008	0.559092	0.750162	0.612722
Gm35733_upstream	13	47359386	47363386	+	0.421106	0.538829	0.716435	0.788991
Gadd45g_upstream	13	51844678	51848678	+	11.1712	6.74678	8.02149	9.90056
Slc25a48_upstream	13	56436355	56440355	+	0.960119	1.13696	1.5268	1.18473
Tgfbi_upstream	13	56607523	56611523	+	2.29007	1.902	2.32522	2.49139
Gm16133_upstream	13	63327556	63331556	+	0.403325	0.434353	0.436289	0.576048
Cntnap3_upstream	13	64901955	64905955	-	0.795764	0.716585	0.835754	0.854489
Gm36377_upstream	13	70653787	70657787	-	0.540804	0.756085	0.794535	0.69181
Gm36426_upstream	13	70679966	70683966	-	0.303915	0.966228	0.633968	0.480298
6430562O15Rik_upstream	13	99410876	99414876	-	0.534717	0.680048	1.0369	0.901218
Naip1_upstream	13	100450869	100454869	-	1.19417	2.8677	1.73047	2.13716
2610204G07Rik_upstream	13	104682931	104686931	+	1.0704	1.17361	1.20442	0.83904
4930544M13Rik_upstream	13	114605237	114609237	+	0.594996	0.473566	0.64741	0.492124
Dnase1l3_upstream	14	7992573	7996573	-	0.368777	0.282675	0.538634	0.443491
Gm30083_upstream	14	34013182	34017182	-	0.387635	0.579119	0.545685	0.470576
A630023A22Rik_upstream	14	34100754	34104754	-	0.54298	0.375552	0.811535	0.609171
Fam213a_upstream	14	41011788	41015788	-	3.32005	3.43718	2.60709	4.51813
Sftpd_upstream	14	41183149	41187149	-	1.07726	1.68591	1.2804	0.987585
Trdc_upstream	14	54140851	54144851	+	1.11631	1.10545	1.0016	0.958334
Gm43305_upstream	14	54295456	54299456	-	1.20677	0.903849	1.28232	0.784681
Gjb2_upstream	14	57102702	57106702	-	3.44548	5.08501	3.82265	4.75026
Sgcg_upstream	14	61256490	61260490	-	0.90678	0.855106	0.87598	1.13728
Kcnrg_upstream	14	61605457	61609457	+	0.918339	1.31077	0.930387	0.978982
Fam167a_upstream	14	63434394	63438394	+	1.44536	1.47626	1.30811	1.35558
Sox7_upstream	14	63941673	63945673	+	2.43357	2.82386	3.57998	3.30413
4930578I06Rik_upstream	14	63985790	63989790	-	0.279069	0.405646	0.526006	0.34458
Rp1l1_upstream	14	63990506	63994506	+	0.495541	0.305143	0.644685	0.488817
Pnoc_upstream	14	65423472	65427472	-	0.67801	0.637488	1.10079	0.682806
Clu_upstream	14	65966483	65970483	+	1.45741	1.44023	1.70567	1.8965
Gm30806_upstream	14	67167588	67171588	+	0.594051	1.15046	0.569926	0.605727
Adamdec1_upstream	14	68580095	68584095	-	1.49535	0.811585	0.86307	0.958113
Adam28_upstream	14	68653842	68657842	-	0.761085	1.00505	1.63286	1.00792
Gm9195_upstream	14	72489838	72493838	-	0.499995	0.521215	0.81942	0.586719
4933402J15Rik_upstream	14	74353527	74357527	+	1.05281	0.922343	1.02973	0.844545
Gm6999_upstream	14	79834712	79838712	+	0.757225	0.538829	0.787598	0.711385
Olfm4_upstream	14	79982081	79986081	+	0.647318	0.675642	0.914692	0.895986
Acod1_upstream	14	103044977	103048977	+	0.776615	0.829824	1.25613	0.650513
Scel_upstream	14	103511342	103515342	+	0.654659	0.893721	1.01627	1.12906
D130009I18Rik_upstream	14	104610791	104614791	+	0.835761	0.768768	0.754195	0.671814
Gm49231_upstream	15	3126564	3130564	+	0.77888	0.875442	0.927667	0.671935
Gm35019_upstream	15	37897716	37901716	-	0.671974	0.695496	0.917385	0.83374
Gm45924_upstream	15	38726516	38730516	-	0.693094	0.548051	0.418475	0.679778
Rspo2_upstream	15	43168826	43172826	-	1.38906	2.39373	2.38464	2.2172
Tnfrsf11b_upstream	15	54276484	54280484	-	4.2298	3.43492	3.56318	6.00816
Mal2_upstream	15	54569192	54573192	+	1.51877	2.35791	2.30996	1.85743
Fer1l6_upstream	15	58508048	58512048	+	0.818609	1.0935	0.86307	0.753741
Fam135b_upstream	15	71725838	71729838	-	0.963469	1.15245	1.15559	1.1178
D730001G18Rik_upstream	15	74776859	74780859	-	0.379879	0.321581	0.518335	0.597542
Slc39a4_upstream	15	76615384	76619384	-	0.445917	0.618655	0.920292	0.816889
Apol7a_upstream	15	77397110	77401110	-	0.698456	0.559889	1.28104	1.07168
Cyp2d10_upstream	15	82405195	82409195	-	0.548687	0.536214	0.76581	0.329595
Gm49431_upstream	15	82619092	82623092	+	0.534504	0.337669	0.569819	0.650513
AU022754_upstream	15	85578252	85582252	+	1.39035	2.05945	2.70586	3.00803
Wnt7b_upstream	15	85580473	85584473	-	1.49006	1.83308	3.23035	2.60525
Nr4a1_upstream	15	101252269	101256269	+	1.80851	2.09596	2.26029	2.58456
Krt7_upstream	15	101409043	101413043	+	0.475289	1.0824	1.54976	1.18575
Krt84_upstream	15	101530820	101534820	-	0.339096	0.297123	0.570006	0.541454
Krt8_upstream	15	102002482	102006482	-	1.00427	1.2946	1.48824	1.59729
Gtsf1_upstream	15	103428470	103432470	-	0.730026	0.659888	0.816827	0.526931
Atf7ip2_upstream	16	10190712	10194712	+	1.88213	2.25036	1.74747	2.06619
Spag6l_upstream	16	16827456	16831456	-	1.78262	3.04073	2.4365	1.78423
Kng1_upstream	16	23055865	23059865	+	0.842748	1.01097	0.85468	1.03324
Hrasls_upstream	16	29207695	29211695	+	1.32042	1.23344	1.46249	1.44954
Gm26569_upstream	16	29944754	29948754	-	1.19876	1.26481	1.07452	1.43739
Muc4_upstream	16	32733886	32737886	+	0.763753	0.752779	0.787367	0.981073
Muc20_upstream	16	32795435	32799435	-	0.618366	0.558582	0.786485	0.663052
Ildr1_upstream	16	36691978	36695978	+	1.17372	2.40262	1.56997	1.7068
BC016579_upstream	16	45652068	45656068	-	1.18801	1.14475	2.16424	1.6757
Tmprss7_upstream	16	45691658	45695658	-	0.647318	0.74385	0.770896	0.92014
Adgrg7_upstream	16	56793855	56797855	-	1.50271	0.972796	0.987167	1.11711
Filip1l_upstream	16	57351093	57355093	+	0.761555	0.66643	0.688874	0.659836
1700063K16Rik_upstream	16	76839784	76843784	-	0.90014	0.952473	0.552875	0.62625
1700041M19Rik_upstream	16	77008897	77012897	-	1.98288	1.03584	0.833206	1.05341
Map3k7cl_upstream	16	87551330	87555330	+	1.69288	1.88848	1.34323	1.69849
1700029J03Rik_upstream	16	93456872	93460872	-	0.415585	0.305215	0.559288	0.771633
AC165271.1_upstream	16	94719894	94723894	+	0.450799	0.399593	0.694708	0.795456
B3galt5_upstream	16	96233801	96237801	+	0.517227	0.504117	0.787598	0.623964
Fam3b_upstream	16	97512816	97516816	-	0.646726	0.548402	0.701242	0.621203
AC183097.2_upstream	17	6359848	6363848	-	0.877807	0.907039	1.01946	0.779134
AC183097.4_upstream	17	6409531	6413531	-	1.05523	0.932729	1.21139	0.904935
AC183097.1_upstream	17	6409834	6413834	-	0.99386	0.903849	0.990464	0.931409
AC167249.1_upstream	17	6580703	6584703	-	0.70325	0.531992	0.712906	0.690975
Sytl3_upstream	17	6657093	6661093	+	1.07957	0.998039	1.00669	1.02537
AC105304.1_upstream	17	9862419	9866419	+	0.701834	0.800482	0.821001	0.726865
Has1_upstream	17	17853205	17857205	-	1.86893	1.117	1.51108	1.69042
Fpr3_upstream	17	17885852	17889852	+	1.53254	1.70879	0.915681	1.6029
Prss32_upstream	17	23841855	23845855	+	0.393924	0.426801	0.593484	0.612319
Prss22_upstream	17	23996100	24000100	-	0.260356	0.241363	0.841024	0.642271
Noxo1_upstream	17	24694234	24698234	+	4.36799	6.10278	3.45322	5.15249
Slc37a1_upstream	17	31293483	31297483	+	5.17239	4.4698	3.99859	6.14496
Cfb_upstream	17	34860518	34864518	-	0.528094	0.495051	0.645234	0.951563
Zbtb12_upstream	17	34877483	34881483	+	0.728026	0.737087	0.791717	0.602318
Gm20547_upstream	17	34880042	34884042	-	0.650947	0.593137	0.610924	0.850104
Slc44a4_upstream	17	34912466	34916466	+	0.415585	0.565611	0.704681	0.917726
Trim15_upstream	17	36865210	36869210	-	0.963669	1.00326	1.19341	1.07329
Trim40_upstream	17	36888123	36892123	-	0.615587	0.681388	0.677732	0.527124
Apobec2_upstream	17	48430930	48434930	-	0.439259	0.463972	0.570189	0.632637
Tspo2_upstream	17	48449522	48453522	-	0.379304	0.36691	0.462502	0.360494
Unc5cl_upstream	17	48452901	48456901	+	0.396201	0.572972	0.848143	1.01871
AC165291.1_upstream	17	48554733	48558733	+	0.650821	0.46728	1.00586	0.504174
Togaram2_upstream	17	71671261	71675261	+	0.380795	0.360309	0.823619	0.581045
Lbh_upstream	17	72916305	72920305	+	7.78433	7.29299	7.06866	11.1759
Ltbp1_upstream	17	75003568	75007568	+	7.60427	7.54762	6.42929	7.2792
Tmem178_upstream	17	80942632	80946632	+	3.06311	3.13558	3.14648	2.35369
Epcam_upstream	17	87633979	87637979	+	2.6924	2.5217	2.69643	3.59515
Dsg3_upstream	18	20508274	20512274	+	0.596076	1.1057	0.988015	0.615074
Dsg2_upstream	18	20556074	20560074	+	2.57203	3.36554	2.31756	2.69458
Nol4_upstream	18	23039653	23043653	-	2.23046	2.00028	2.26029	2.09652
AC102496.1_upstream	18	30265249	30269249	+	2.39828	1.95728	2.92757	3.51708
Hbegf_upstream	18	36513805	36517805	-	2.9433	3.21507	2.21377	2.79502
Sncaip_upstream	18	52765709	52769709	+	8.99889	7.4509	5.13714	6.66757
Megf10_upstream	18	57131090	57135090	+	1.28898	1.65793	1.74296	1.57905
Ctxn3_upstream	18	57466516	57470516	+	0.600765	0.714966	0.783555	0.652176
Ccdc192_upstream	18	57531780	57535780	+	0.855194	1.06936	0.787598	1.02957
Ptgdr2_upstream	19	10935160	10939160	+	0.671302	0.475237	0.598923	0.70048
Trpm6_upstream	19	18747983	18751983	+	2.25036	3.40823	1.97425	3.31427
Tmc1_upstream	19	20952202	20956202	-	0.827171	0.978011	0.976514	1.15336
Lipk_upstream	19	34006290	34010290	+	0.924463	1.02909	1.38871	0.858842
Lipm_upstream	19	34098943	34102943	+	0.935997	1.08016	1.13923	0.819064
Gsto1_upstream	19	47852970	47856970	+	4.87926	5.60107	5.0988	6.32996
Plekhs1_upstream	19	56459640	56463640	+	0.776051	0.879511	1.15149	0.848385
AC140413.1_upstream	19	57495390	57499390	+	0.616031	0.501705	0.759355	0.606734
Ccnb3_upstream	X	7039619	7043619	-	1.04608	0.85758	1.16653	0.867259
Slc6a14_upstream	X	21712896	21716896	+	1.16507	1.72345	1.55938	1.28348
Tenm1_upstream	X	43427126	43431126	-	1.29904	1.38447	1.65104	1.47248
Gm15482_upstream	X	53973000	53977000	-	1.76456	1.32736	1.90558	2.40659
Gdpd2_upstream	X	100727873	100731873	+	0.646332	0.768169	0.835703	0.714061
Gm6325_upstream	X	106382071	106386071	-	1.16951	1.04825	0.884236	0.904935
Taf7l_upstream	X	134474490	134478490	-	0.546364	0.568321	0.91113	0.668927
Rnf128_upstream	X	139561316	139565316	+	1.25384	2.74578	2.30178	2.0548
Trpc5_upstream	X	144686180	144690180	-	1.1318	1.02685	1.25132	1.09575
S100g_upstream	X	162962599	162966599	-	0.552532	0.75193	0.93865	0.847039
Grpr_upstream	X	163547677	163551677	-	0.952358	0.632938	1.0103	1.01563
Glra2_upstream	X	165325393	165329393	-	1.33966	1.57064	1.53196	2.32178
Egfl6_upstream	X	166583720	166587720	-	1.1274	1.0227	0.948457	0.71076
