# Supplementary material for: The pregnant myometrium is epigenetically activated at contractility-driving gene loci prior to the onset of labor in mice
Source: PLOS journal article supplement (doi:10.1371/journal.pbio.3000710), 2020-07-15
Supplement: S8 (10.1371/journal.pbio.3000710.s008) [file journal.pbio.3000710.s008]

| Rank | Motif                                                                               | Name                                                        | P-value | log P-value | q-value (Benjamini) | # Target Sequences with Motif | % of Targets Sequences with Motif | # Background Sequences with Motif | % of Background Sequences with Motif |
|------|-------------------------------------------------------------------------------------|-------------------------------------------------------------|---------|-------------|---------------------|-------------------------------|-----------------------------------|-----------------------------------|--------------------------------------|
| 1    |    | Fra1(bZIP)/BT549-Fra1-ChIP-Seq(GSE46166)/Homer              | 1e-4    | -1.126e+01  | 0.0056              | 103.0                         | 26.01%                            | 5183.0                            | 17.38%                               |
| 2    |    | E2A(bHLH)/near_PU.1/Bcell-PU.1-ChIP-Seq(GSE21512)/Homer     | 1e-4    | -1.077e+01  | 0.0056              | 228.0                         | 57.58%                            | 14044.6                           | 47.10%                               |
| 3    |    | CTCF(Zf)/CD4+-CTCF-ChIP-Seq(Barski_et_al)/Homer             | 1e-4    | -1.039e+01  | 0.0056              | 41.0                          | 10.35%                            | 1548.6                            | 5.19%                                |
| 4    |    | Fra2(bZIP)/Striatum-Fra2-ChIP-Seq(GSE43429)/Homer           | 1e-4    | -9.835e+00  | 0.0059              | 89.0                          | 22.47%                            | 4462.7                            | 14.97%                               |
| 5    |    | BORIS(Zf)/K562-CTCF-ChIP-Seq(GSE32465)/Homer                | 1e-4    | -9.772e+00  | 0.0059              | 58.0                          | 14.65%                            | 2561.2                            | 8.59%                                |
| 6    |    | AP-1(bZIP)/ThioMac-PU.1-ChIP-Seq(GSE21512)/Homer            | 1e-4    | -9.317e+00  | 0.0066              | 126.0                         | 31.82%                            | 6976.5                            | 23.40%                               |
| 7    |    | NFkB-p65-Rel(RHD)/ThioMac-LPS-Expression(GSE23622)/Homer    | 1e-3    | -8.971e+00  | 0.0080              | 23.0                          | 5.81%                             | 713.8                             | 2.39%                                |
| 8    |    | Fos(bZIP)/TSC-Fos-ChIP-Seq(GSE110950)/Homer                 | 1e-3    | -8.007e+00  | 0.0183              | 100.0                         | 25.25%                            | 5430.3                            | 18.21%                               |
| 9    |    | JunB(bZIP)/DendriticCells-JunB-ChIP-Seq(GSE36099)/Homer     | 1e-3    | -7.648e+00  | 0.0233              | 95.0                          | 23.99%                            | 5153.5                            | 17.28%                               |
| 10   |    | Fos12(bZIP)/3T3L1-Fos12-ChIP-Seq(GSE56872)/Homer            | 1e-3    | -7.546e+00  | 0.0233              | 63.0                          | 15.91%                            | 3104.2                            | 10.41%                               |
| 11   |    | COUP-TFII(NR)/Artia-Nr2F2-ChIP-Seq(GSE46497)/Homer          | 1e-3    | -7.445e+00  | 0.0234              | 242.0                         | 61.11%                            | 15751.3                           | 52.83%                               |
| 12   |    | Snail1(Zf)/LS174T-SNAIL1.HA-ChIP-Seq(GSE127183)/Homer       | 1e-3    | -7.320e+00  | 0.0243              | 153.0                         | 38.64%                            | 9204.1                            | 30.87%                               |
| 13   |    | STAT4(Stat1)/CD4-Stat4-ChIP-Seq(GSE22104)/Homer             | 1e-3    | -7.248e+00  | 0.0243              | 172.0                         | 43.43%                            | 10581.6                           | 35.49%                               |
| 14   |   | Slug(Zf)/Mesoderm-Snai2-ChIP-Seq(GSE61475)/Homer            | 1e-3    | -7.120e+00  | 0.0254              | 108.0                         | 27.27%                            | 6111.7                            | 20.50%                               |
| 15   |  | Atf3(bZIP)/GBM-ATF3-ChIP-Seq(GSE3912)/Homer                 | 1e-2    | -6.872e+00  | 0.0304              | 107.0                         | 27.02%                            | 6086.9                            | 20.41%                               |
| 16   |  | Sox6(HMG)/Myotubes-Sox6-ChIP-Seq(GSE32627)/Homer            | 1e-2    | -5.901e+00  | 0.0752              | 225.0                         | 56.82%                            | 14811.9                           | 49.67%                               |
| 17   |  | ZEB1(Zf)/PDAC-ZEB1-ChIP-Seq(GSE64557)/Homer                 | 1e-2    | -5.886e+00  | 0.0752              | 246.0                         | 62.12%                            | 16416.5                           | 55.06%                               |
| 18   |  | Pax8(Paired,Homeobox)/Thyroid-Pax8-ChIP-Seq(GSE26938)/Homer | 1e-2    | -5.518e+00  | 0.0982              | 64.0                          | 16.16%                            | 3446.7                            | 11.56%                               |
| 19   |  | CEBPAP1(bZIP)/ThioMac-CEBPb-ChIP-Seq(GSE21512)/Homer        | 1e-2    | -5.352e+00  | 0.1097              | 121.0                         | 30.56%                            | 7351.9                            | 24.66%                               |
| 20   |  | BATF(bZIP)/Th17-BATF-ChIP-Seq(GSE39756)/Homer               | 1e-2    | -4.928e+00  | 0.1593              | 102.0                         | 25.76%                            | 6117.2                            | 20.52%                               |
| 21   |  | PAX5(Paired,Homeobox)/GM12878-PAX5-ChIP-Seq(GSE32465)/Homer | 1e-2    | -4.834e+00  | 0.1667              | 69.0                          | 17.42%                            | 3889.7                            | 13.04%                               |
| 22   |  | COUP-TFII(NR)/K562-NR2F1-ChIP-Seq(Encode)/Homer             | 1e-2    | -4.832e+00  | 0.1667              | 212.0                         | 53.54%                            | 14108.7                           | 47.32%                               |
| 23   |  | Jun-AP1(bZIP)/K562-cJun-ChIP-Seq(GSE31477)/Homer            | 1e-2    | -4.724e+00  | 0.1699              | 42.0                          | 10.61%                            | 2151.0                            | 7.21%                                |
| 24   |  | RARa(NR)/K562-RARa-ChIP-Seq(Encode)/Homer                   | 1e-2    | -4.722e+00  | 0.1699              | 316.0                         | 79.80%                            | 22230.8                           | 74.56%                               |

**S8 Fig. Motif enrichment at promoters of labour upregulated genes.** Motif enrichment at promoters (1 kb upstream of TSS) of genes with increased expression in labour based on intron reads. Data associated with this figure can be found in S6 DATA.
